# Supplementary material for: Synthesis and structure of azole-fused indeno[2,1-c]quinolines and their anti-mycobacterial properties
Source: Royal Society of Chemistry journal article supplement (doi:10.1039/c0ob00445f), 2010-01-01
Supplement: c0ob00445f.pdf [file c0ob00445f.pdf]

## **Supporting Information**

### Synthesis and Structure of Azole-Fused Indeno[2,1-c]Quinolines and their Antimycobacterial properties

Ram Shankar Upadhayaya<sup>a</sup>, Popat D. Shinde<sup>a</sup>, Aftab Y. Sayyed<sup>a</sup>, Sandip A. Kadam<sup>a</sup>, Amit N. Bawane<sup>a</sup>, Avijit Poddar<sup>b</sup>, Oleksandr Plashkevych<sup>c</sup>, Andras Földesi<sup>c</sup> and Jyoti Chattopadhyaya<sup>\*.c</sup>

<sup>a</sup>*Institute of Molecular Medicine, Pune 411 057, India.*

<sup>b</sup>*Institute of Molecular Medicine, Calcutta 700 091, India.*

<sup>c</sup>*Bioorganic Chemistry Program, Department of Cell and Molecular Biology, Biomedical Centre, Uppsala University, SE-75123 Uppsala, Sweden.*

*\* Corresponding Author*

*Phone: +46-18-4714577, Fax: +46-18-554495*

*Email: [jyoti@boc.uu.se](mailto:jyoti@boc.uu.se)*

**Table of Contents**

| <b>Sr. No.</b> | <b>Contents</b>                                              | <b>Page No.</b> |
|----------------|--------------------------------------------------------------|-----------------|
| 1              | <sup>1</sup> H-NMR spectrum of compound <b>7</b>             | S9              |
| 2              | COSY-spectrum of compound <b>7</b>                           | S10             |
| 3              | MASS spectrum of compound <b>7</b>                           | S11             |
| 4              | LCMS spectrum of compound <b>7</b>                           | S12             |
| 5              | HPLC chromatogram of compound <b>7</b>                       | S13             |
| 6              | IR spectrum of compound <b>7</b>                             | S14             |
| 7              | <sup>1</sup> H-NMR spectrum of compound <b>8</b>             | S15             |
| 8              | <sup>1</sup> H-NMR spectrum of compound <b>8 (expansion)</b> | S16             |
| 9              | COSY spectrum of compound <b>8</b>                           | S17             |
| 10             | HSQC spectrum of compound <b>8</b>                           | S18             |
| 11             | HMBC spectrum of compound <b>8</b>                           | S19             |
| 12             | MASS spectrum of compound <b>8</b>                           | S20             |
| 13             | LCMS spectrum of compound <b>8</b>                           | S21             |
| 14             | HPLC chromatogram of compound <b>8</b>                       | S22             |
| 15             | IR spectrum of compound <b>8</b>                             | S23             |
| 16             | <sup>1</sup> H-NMR spectrum of compound <b>9</b>             | S24             |
| 17             | <sup>1</sup> H-NMR spectrum of compound <b>9(expansion)</b>  | S25             |
| 18             | COSY spectrum of compound <b>9</b>                           | S26             |
| 19             | HSQC spectrum of compound <b>9</b>                           | S27             |
| 20             | HMBC spectrum of compound <b>9</b>                           | S28             |
| 21             | HMBC spectrum of compound <b>9(expansion)</b>                | S29             |
| 22             | MASS spectrum of compound <b>9</b>                           | S30             |
| 23             | LCMS spectrum of compound <b>9</b>                           | S31             |
| 24             | HPLC chromatogram of compound <b>9</b>                       | S32             |
| 25             | IR spectrum of compound <b>9</b>                             | S33             |
| 26             | <sup>1</sup> H-NMR spectrum of compound <b>10</b>            | S34             |
| 27             | D <sub>2</sub> O exchange spectrum of compound <b>10</b>     | S35             |
| 28             | <sup>13</sup> C-NMR spectrum of compound <b>10</b>           | S36             |
| 29             | MASS spectrum of compound <b>10</b>                          | S37             |
| 30             | LCMS spectrum of compound <b>10</b>                          | S38             |

|    |                                                    |     |
|----|----------------------------------------------------|-----|
| 31 | HPLC chromatogram of compound <b>10</b>            | S39 |
| 32 | IR spectrum of compound <b>10</b>                  | S40 |
| 33 | <sup>1</sup> H-NMR spectrum of compound <b>11</b>  | S41 |
| 34 | <sup>13</sup> C-NMR spectrum of compound <b>11</b> | S42 |
| 35 | MASS spectrum of compound <b>11</b>                | S43 |
| 36 | LCMS spectrum of compound <b>11</b>                | S44 |
| 37 | HPLC chromatogram of compound <b>11</b>            | S45 |
| 38 | IR spectrum of compound <b>11</b>                  | S46 |
| 39 | <sup>1</sup> H-NMR spectrum of compound <b>12</b>  | S47 |
| 40 | <sup>13</sup> C-NMR spectrum of compound <b>12</b> | S48 |
| 41 | MASS spectrum of compound <b>12</b>                | S49 |
| 42 | LCMS spectrum of compound <b>12</b>                | S50 |
| 43 | HPLC chromatogram of compound <b>12</b>            | S51 |
| 44 | IR spectrum of compound <b>12</b>                  | S52 |
| 45 | <sup>1</sup> H-NMR spectrum of compound <b>13</b>  | S53 |
| 46 | <sup>1</sup> H-NMR spectrum of compound <b>13</b>  | S54 |
| 47 | <sup>13</sup> C-NMR spectrum of compound <b>13</b> | S55 |
| 48 | COSY spectrum of compound <b>13</b>                | S56 |
| 49 | COSY spectrum of compound <b>13 (expansion)</b>    | S57 |
| 50 | HSQC spectrum of compound <b>13</b>                | S58 |
| 51 | HSQC spectrum of compound <b>13 (expansion)</b>    | S59 |
| 52 | HMBC spectrum of compound <b>13</b>                | S60 |
| 53 | HMBC spectrum of compound <b>13 (expansion)</b>    | S61 |
| 54 | HMBC spectrum of compound <b>13 (expansion)</b>    | S62 |
| 55 | HMBC spectrum of compound <b>13 (expansion)</b>    | S63 |
| 56 | HMBC spectrum of compound <b>13 (expansion)</b>    | S64 |
| 57 | MASS spectrum of compound <b>13</b>                | S65 |
| 58 | LCMS spectrum of compound <b>13</b>                | S66 |
| 59 | HPLC chromatogram of compound <b>13</b>            | S67 |
| 60 | IR spectrum of compound <b>13</b>                  | S68 |
| 61 | <sup>1</sup> H-NMR spectrum of compound <b>14</b>  | S69 |

|    |                                                               |      |
|----|---------------------------------------------------------------|------|
| 62 | D <sub>2</sub> O exchanged spectrum of compound <b>14</b>     | S70  |
| 63 | LCMS spectrum of compound <b>14</b>                           | S71  |
| 64 | IR spectrum of compound <b>14</b>                             | S72  |
| 65 | <sup>1</sup> H-NMR spectrum of compound <b>15</b>             | S73  |
| 66 | <sup>13</sup> C-NMR spectrum of compound <b>15</b>            | S74  |
| 67 | COSY spectrum of compound <b>15</b>                           | S75  |
| 68 | COSY spectrum of compound <b>15 (expansion)</b>               | S76  |
| 69 | HSQC spectrum of compound <b>15</b>                           | S77  |
| 70 | HMBC spectrum of compound <b>15</b>                           | S78  |
| 71 | HMBC spectrum of compound <b>15 (expansion)</b>               | S79  |
| 72 | HMBC spectrum of compound <b>15 (expansion)</b>               | S80  |
| 73 | MASS spectrum of compound <b>15</b>                           | S81  |
| 74 | LCMS spectrum of compound <b>15</b>                           | S82  |
| 75 | HPLC chromatogram of compound <b>15</b>                       | S83  |
| 76 | IR spectrum of compound <b>15</b>                             | S84  |
| 77 | <sup>1</sup> H-NMR spectrum of compound <b>16</b>             | S85  |
| 78 | D <sub>2</sub> O exchanged spectrum of compound <b>16</b>     | S86  |
| 79 | <sup>13</sup> C-NMR spectrum of compound <b>16</b>            | S87  |
| 80 | MASS spectrum of compound <b>16</b>                           | S88  |
| 81 | LCMS spectrum of compound <b>16</b>                           | S89  |
| 82 | HPLC chromatogram of compound <b>16</b>                       | S90  |
| 83 | IR spectrum of compound <b>16</b>                             | S91  |
| 84 | <sup>1</sup> H-NMR spectrum of compound <b>17</b>             | S92  |
| 85 | <sup>1</sup> H-NMR spectrum of compound <b>17(expansion)</b>  | S93  |
| 86 | <sup>1</sup> H-NMR spectrum of compound <b>17(expansion)</b>  | S94  |
| 87 | COSY spectrum of compound <b>17</b>                           | S95  |
| 88 | <sup>13</sup> C-NMR spectrum of compound <b>17</b>            | S96  |
| 89 | <sup>13</sup> C-NMR spectrum of compound <b>17(expansion)</b> | S97  |
| 90 | HSQC spectrum of compound <b>17</b>                           | S98  |
| 91 | HSQC spectrum of compound <b>17(expansion)</b>                | S99  |
| 92 | HMBC spectrum of compound <b>17</b>                           | S100 |



|     |                                                    |      |
|-----|----------------------------------------------------|------|
| 93  | HMBC spectrum of compound <b>17(expansion)</b>     | S101 |
| 94  | HMBC spectrum of compound <b>17(expansion)</b>     | S102 |
| 95  | HMBC spectrum of compound <b>17(expansion)</b>     | S103 |
| 96  | MASS spectrum of compound <b>17</b>                | S104 |
| 97  | LCMS spectrum of compound <b>17</b>                | S105 |
| 98  | HPLC chromatogram of compound <b>17</b>            | S106 |
| 99  | IR spectrum of compound <b>17</b>                  | S107 |
| 100 | <sup>1</sup> H-NMR spectrum of compound <b>18</b>  | S108 |
| 101 | <sup>13</sup> C-NMR spectrum of compound <b>18</b> | S109 |
| 102 | DEPT spectrum of compound <b>18</b>                | S110 |
| 103 | MASS spectrum of compound <b>18</b>                | S111 |
| 104 | LCMS spectrum of compound <b>18</b>                | S112 |
| 105 | HPLC chromatogram of compound <b>18</b>            | S113 |
| 106 | IR spectrum of compound <b>18</b>                  | S114 |
| 107 | <sup>1</sup> H-NMR spectrum of compound <b>19</b>  | S115 |
| 108 | <sup>13</sup> C-NMR spectrum of compound <b>19</b> | S116 |
| 109 | DEPT spectrum of compound <b>19</b>                | S117 |
| 110 | MASS spectrum of compound <b>19</b>                | S118 |
| 111 | LCMS spectrum of compound <b>19</b>                | S119 |
| 112 | HPLC chromatogram of compound <b>19</b>            | S120 |
| 113 | IR spectrum of compound <b>19</b>                  | S121 |
| 114 | <sup>1</sup> H-NMR spectrum of compound <b>20</b>  | S122 |
| 115 | <sup>13</sup> C-NMR spectrum of compound <b>20</b> | S123 |
| 116 | DEPT spectrum of compound <b>20</b>                | S124 |
| 117 | MASS spectrum of compound <b>20</b>                | S125 |
| 118 | LCMS spectrum of compound <b>20</b>                | S126 |
| 119 | HPLC chromatogram of compound <b>20</b>            | S127 |
| 120 | IR spectrum of compound <b>20</b>                  | S128 |
| 121 | <sup>1</sup> H-NMR spectrum of compound <b>21</b>  | S129 |
| 122 | <sup>13</sup> C-NMR spectrum of compound <b>21</b> | S130 |
| 123 | DEPT spectrum of compound <b>21</b>                | S131 |

|     |                                                                |      |
|-----|----------------------------------------------------------------|------|
| 124 | MASS spectrum of compound <b>21</b>                            | S132 |
| 125 | LCMS spectrum of compound <b>21</b>                            | S133 |
| 126 | HPLC chromatogram of compound <b>21</b>                        | S134 |
| 127 | IR spectrum of compound <b>21</b>                              | S135 |
| 128 | <sup>1</sup> H-NMR spectrum of compound <b>22</b>              | S136 |
| 129 | <sup>13</sup> C-NMR spectrum of compound <b>22</b>             | S137 |
| 130 | MASS spectrum of compound <b>22</b>                            | S138 |
| 131 | LCMS spectrum of compound <b>22</b>                            | S139 |
| 132 | HPLC chromatogram of compound <b>22</b>                        | S140 |
| 133 | IR spectrum of compound <b>22</b>                              | S141 |
| 134 | <sup>1</sup> H-NMR spectrum of compound <b>23</b>              | S142 |
| 135 | D <sub>2</sub> O exchange spectrum of compound <b>23</b>       | S143 |
| 136 | COSY spectrum of compound <b>23</b>                            | S144 |
| 137 | <sup>13</sup> C-NMR spectrum of compound <b>23</b>             | S145 |
| 138 | <sup>13</sup> C-NMR spectrum of compound <b>23 (expansion)</b> | S146 |
| 139 | HSQC spectrum of compound <b>23</b>                            | S147 |
| 140 | HMBC spectrum of compound <b>23</b>                            | S148 |
| 141 | HMBC spectrum of compound <b>23 (expansion)</b>                | S149 |
| 142 | HMBC spectrum of compound <b>23 (expansion)</b>                | S150 |
| 143 | HMBC spectrum of compound <b>23 (expansion)</b>                | S151 |
| 144 | MASS spectrum of compound <b>23</b>                            | S152 |
| 145 | LCMS spectrum of compound <b>23</b>                            | S153 |
| 146 | IR spectrum of compound <b>23</b>                              | S154 |
| 147 | <sup>1</sup> H-NMR spectrum of compound <b>24</b>              | S155 |
| 148 | D <sub>2</sub> O exchange spectrum of compound <b>24</b>       | S156 |
| 149 | <sup>13</sup> C-NMR spectrum of compound <b>24</b>             | S157 |
| 150 | DEPT spectrum of compound <b>24</b>                            | S158 |
| 151 | MASS spectrum of compound <b>24</b>                            | S159 |
| 152 | LCMS spectrum of compound <b>24</b>                            | S160 |
| 153 | HPLC chromatogram of compound <b>24</b>                        | S161 |
| 154 | IR spectrum of compound <b>24</b>                              | S162 |

|     |                                                               |      |
|-----|---------------------------------------------------------------|------|
| 155 | <sup>1</sup> H-NMR spectrum of compound <b>25</b>             | S163 |
| 156 | <sup>1</sup> H-NMR spectrum of compound <b>25 (expansion)</b> | S164 |
| 157 | <sup>13</sup> C-NMR spectrum of compound <b>25</b>            | S165 |
| 158 | DEPT spectrum of compound <b>25</b>                           | S166 |
| 159 | COSY spectrum of compound <b>25</b>                           | S167 |
| 160 | COSY spectrum of compound <b>25 (expansion)</b>               | S168 |
| 161 | HSQC spectrum of compound <b>25</b>                           | S169 |
| 162 | HSQC spectrum of compound <b>25 (expansion)</b>               | S170 |
| 163 | HMBC spectrum of compound <b>25</b>                           | S171 |
| 164 | HMBC spectrum of compound <b>25 (expansion)</b>               | S172 |
| 165 | HMBC spectrum of compound <b>25 (expansion)</b>               | S173 |
| 166 | COSY spectrum of compound <b>25 +H</b>                        | S174 |
| 167 | COSY spectrum of compound <b>25 +H (expansion)</b>            | S175 |
| 168 | MASS spectrum of compound <b>25</b>                           | S176 |
| 169 | LCMS spectrum of compound <b>25</b>                           | S177 |
| 170 | HPLC chromatogram of compound <b>25</b>                       | S178 |
| 171 | IR spectrum of compound <b>25</b>                             | S179 |
| 172 | <sup>1</sup> H-NMR spectrum of compound <b>26</b>             | S180 |
| 173 | D <sub>2</sub> O exchanged spectrum of compound <b>26</b>     | S181 |
| 174 | <sup>13</sup> C-NMR spectrum of compound <b>26</b>            | S182 |
| 175 | DEPT spectrum of compound <b>26</b>                           | S183 |
| 176 | MASS spectrum of compound <b>26</b>                           | S184 |
| 177 | LCMS spectrum of compound <b>26</b>                           | S185 |
| 178 | HPLC chromatogram of compound <b>26</b>                       | S186 |
| 179 | IR spectrum of compound <b>26</b>                             | S187 |
| 180 | <sup>1</sup> H-NMR spectrum of compound <b>27</b>             | S188 |
| 181 | <sup>13</sup> C-NMR spectrum of compound <b>27</b>            | S189 |
| 182 | DEPT spectrum of compound <b>27</b>                           | S190 |
| 183 | MASS spectrum of compound <b>27</b>                           | S191 |
| 184 | LCMS spectrum of compound <b>27</b>                           | S192 |
| 185 | HPLC chromatogram of compound <b>27</b>                       | S193 |

|     |                                                                                                                                                                  |              |
|-----|------------------------------------------------------------------------------------------------------------------------------------------------------------------|--------------|
| 186 | IR spectrum of compound <b>27</b>                                                                                                                                | S194         |
| 187 | <sup>1</sup> H-NMR spectrum of compound <b>28</b>                                                                                                                | S195         |
| 188 | <sup>13</sup> C-NMR spectrum of compound <b>28</b>                                                                                                               | S196         |
| 189 | DEPT spectrum of compound <b>28</b>                                                                                                                              | S197         |
| 190 | MASS spectrum of compound <b>28</b>                                                                                                                              | S198         |
| 191 | LCMS spectrum of compound <b>28</b>                                                                                                                              | S199         |
| 192 | HPLC chromatogram of compound <b>28</b>                                                                                                                          | S200         |
| 193 | IR spectrum of compound <b>28</b>                                                                                                                                | S201         |
| 194 | <sup>1</sup> H-NMR spectrum of compound <b>29</b>                                                                                                                | S202         |
| 195 | D <sub>2</sub> O exchanged spectrum of compound <b>29</b>                                                                                                        | S203         |
| 196 | <sup>13</sup> C-NMR spectrum of compound <b>29</b>                                                                                                               | S204         |
| 197 | DEPT spectrum of compound <b>29</b>                                                                                                                              | S205         |
| 198 | LCMS spectrum of compound <b>29</b>                                                                                                                              | S206         |
| 199 | HPLC chromatogram of compound <b>29</b>                                                                                                                          | S207         |
| 200 | IR spectrum of compound <b>29</b>                                                                                                                                | S208         |
| 201 | Comparison of Chemical shift values ( $\delta$ ) of quinoline ring protons after formation of fused ring system ( <b>Table S1</b> )                              | S209         |
| 202 | Plot of aromatic <sup>1</sup> H Chemical shifts for various fused azoles ( <b>Figure S1</b> )                                                                    | S215         |
| 203 | <b>Computational details</b><br>Thiol-thione tautomerism of compound <b>23</b><br><i>Ab initio</i> simulation of proton chemical shifts                          | S216<br>S217 |
| 204 | Comparison between theoretical and experimental proton chemical shifts of all protons ( <b>Figure S2</b> )                                                       | S218         |
| 205 | Hartree-Fock energy of thiol and thione tautomeric forms of compound <b>23</b> ( <b>Table S2</b> )                                                               | S219         |
| 206 | Comparison between theoretical and experimental chemical shifts ( <b>Table-S3</b> )                                                                              | S220         |
| 207 | Coordinates, charge, multiplicity, Hartree-Fock energy and dipole moment of <i>ab initio</i> optimized geometries (HF/6-31G**, Gaussian 03). ( <b>Table S4</b> ) | S223         |
| 208 | References                                                                                                                                                       | S237         |

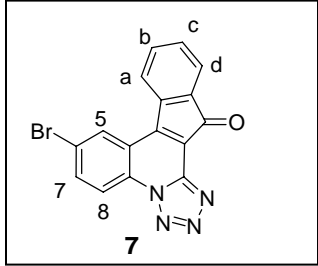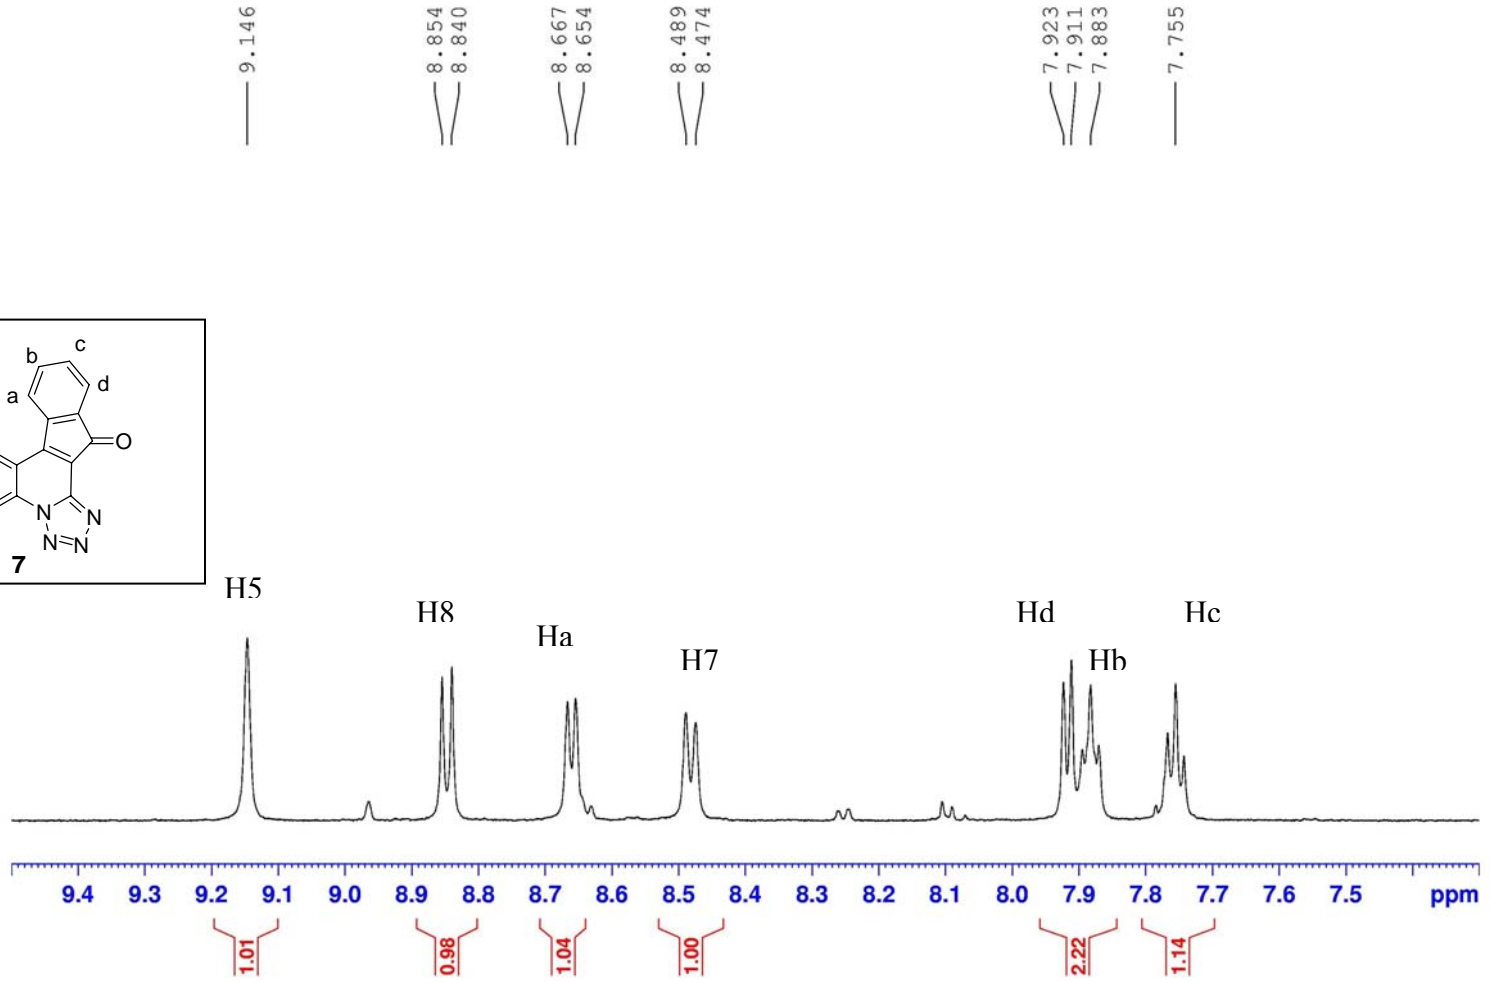

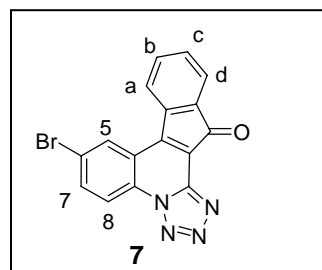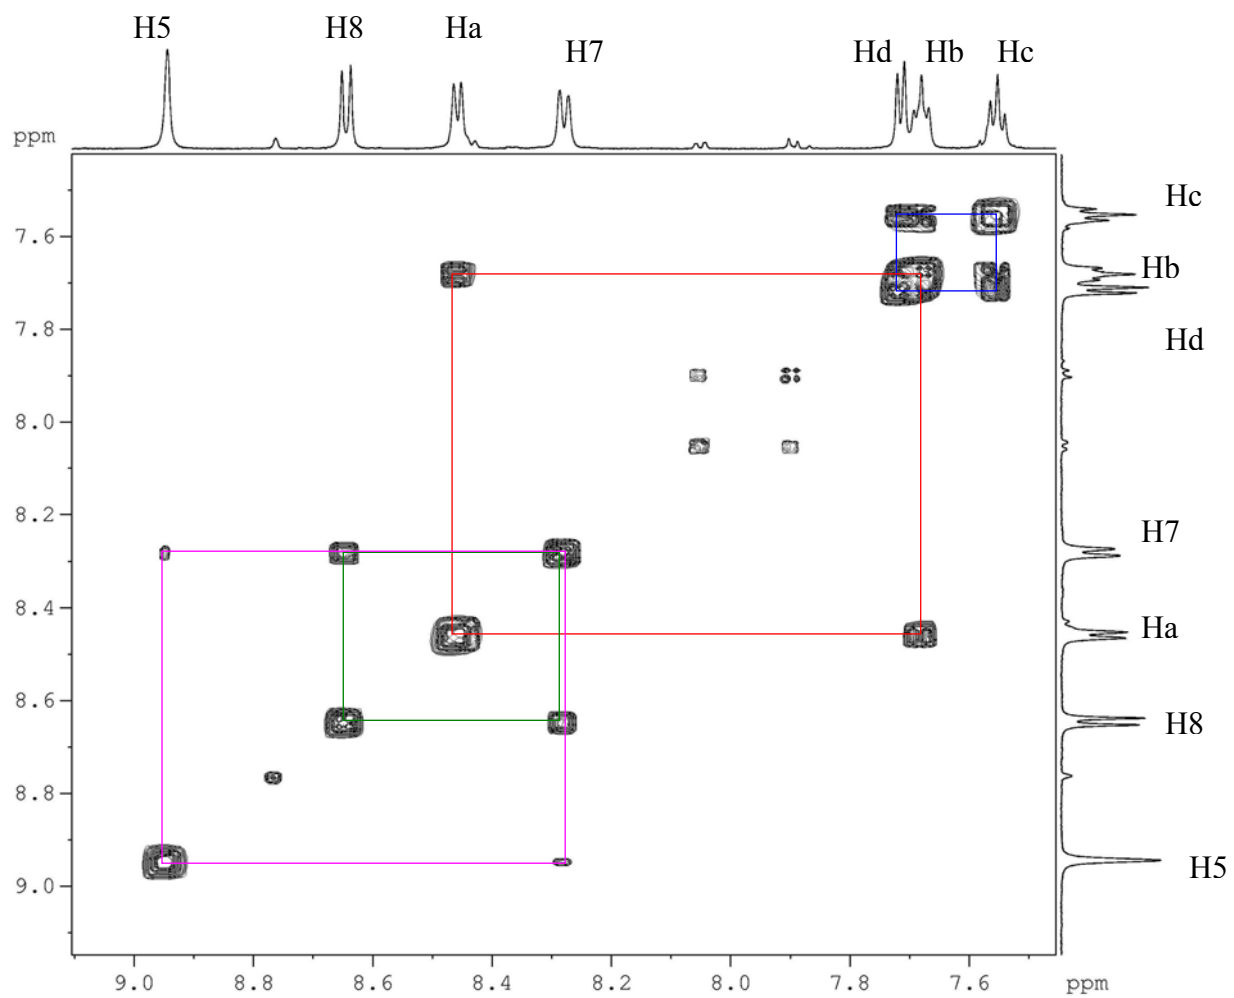

Sample Name: CR080-78-91-91A

INDIA  
Acq. Time: 12:15

Acq. Date: Friday, March 12, 2010

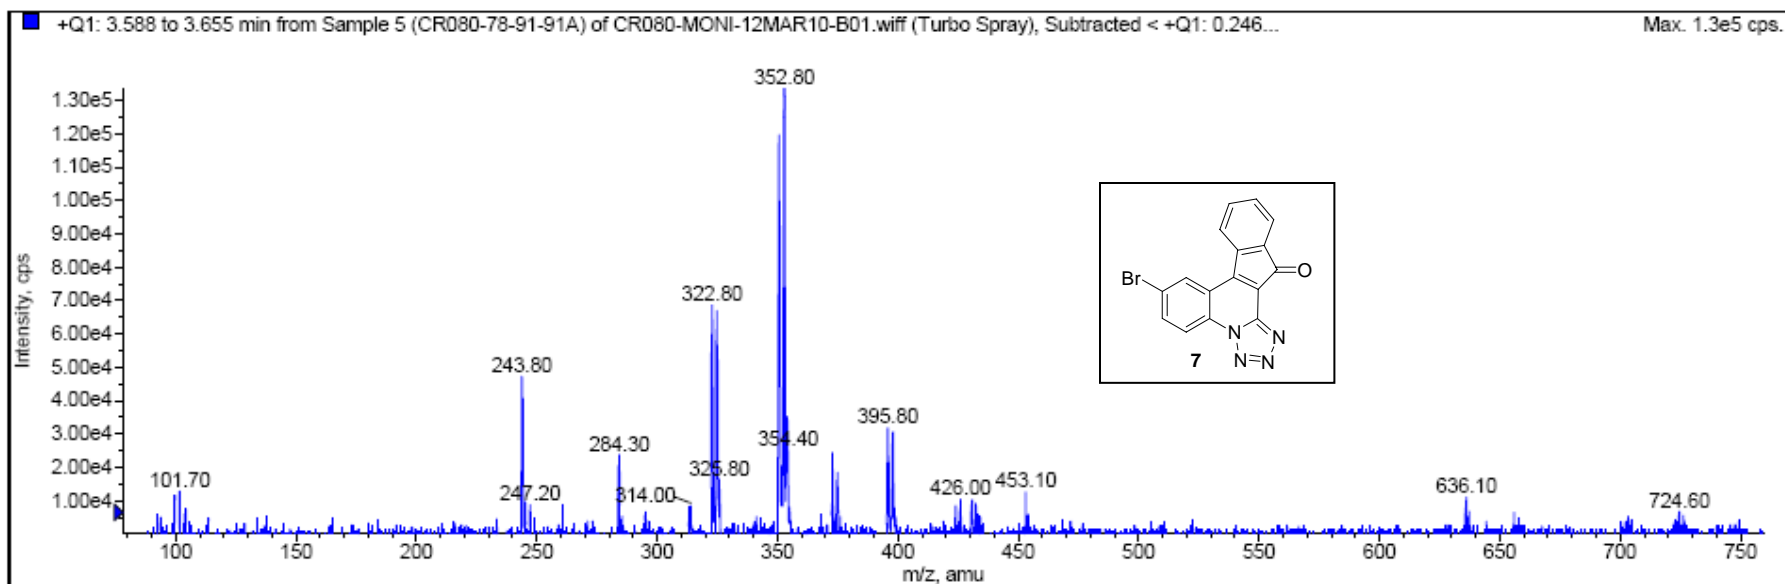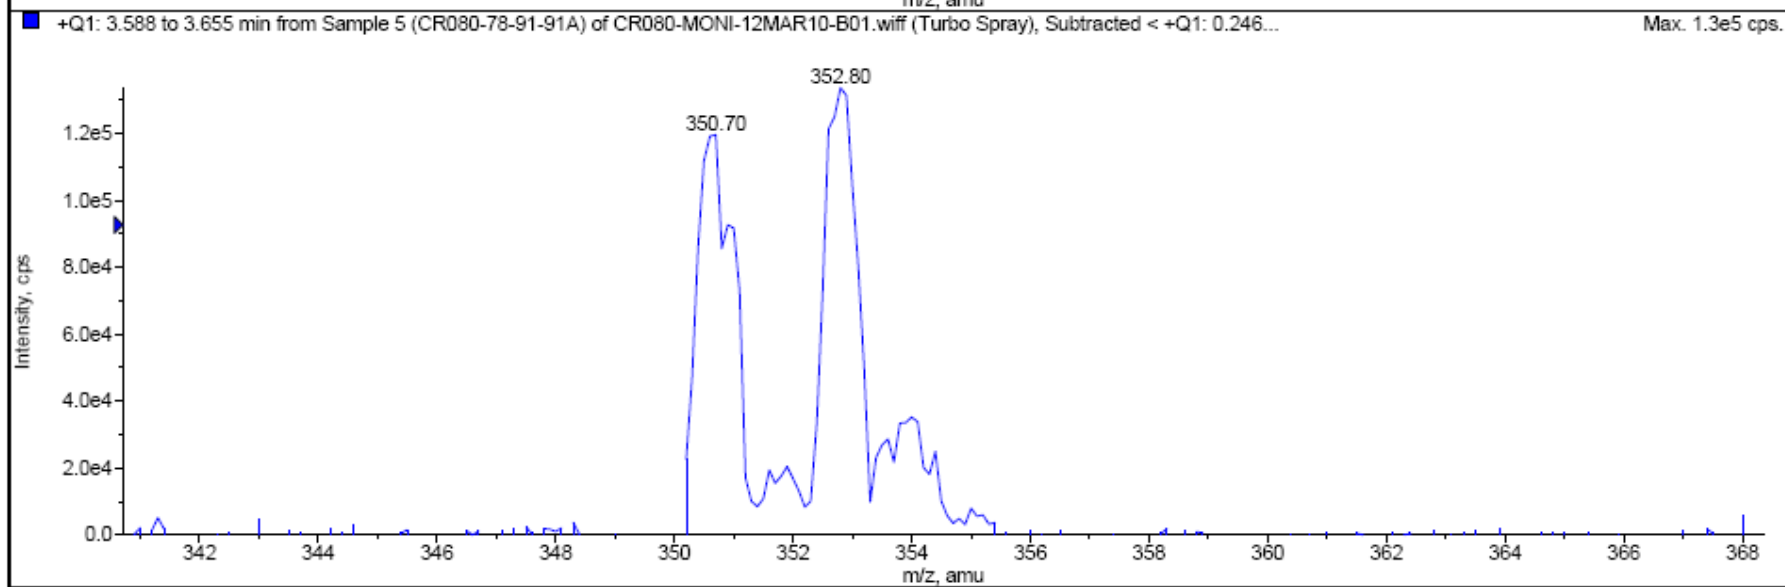

\*Sample Comment: [M+H] Expected 351 \*\*Analyzed By : \*\*Checked By :

Sample Name: CR080-78-91-91 RM

CHEMBIOTEK A TCG Lifesciences Enterprise, PUNE

Acq. Date: Wednesday, June 03, 2009

Acq. Time: 14:48

TIC of +Q1: from Sample 1 (CR080-78-91-91 RM) of CR080-MONI-03JUNE09-B02.wiff (Turbo S... Max. 9.1e7 cps.

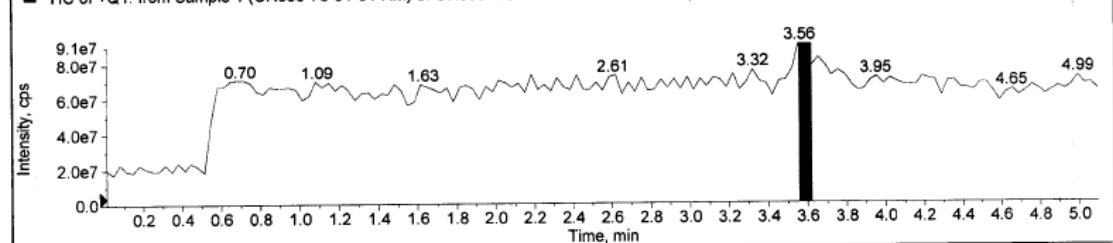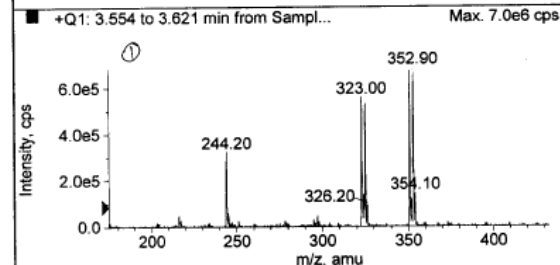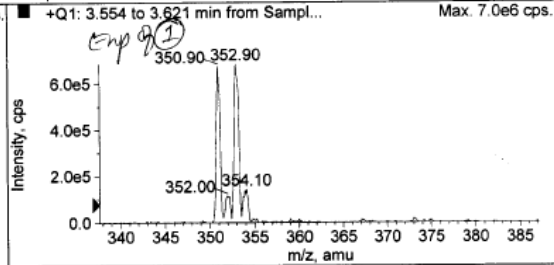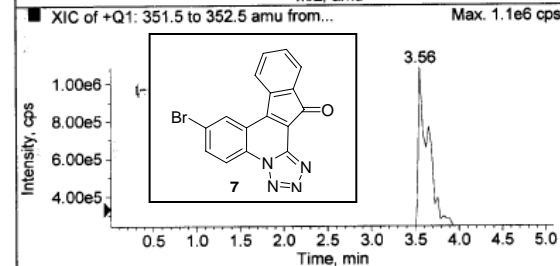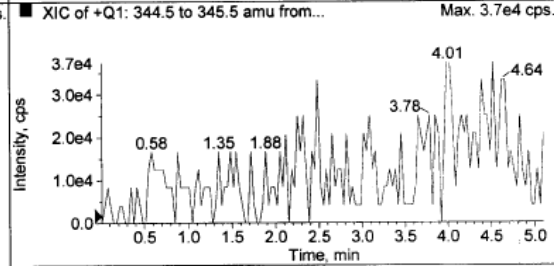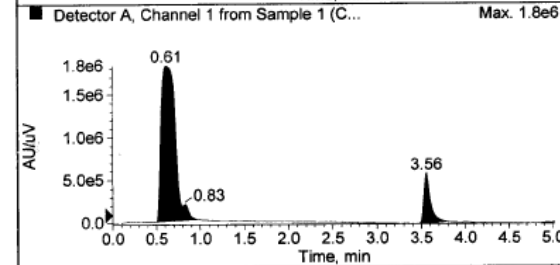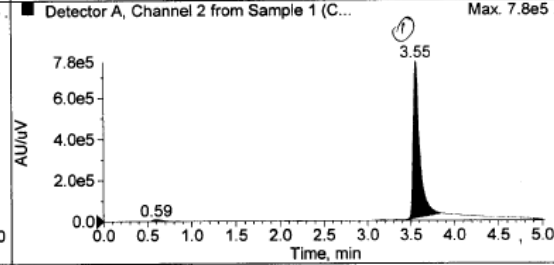

Peak List for "Detector A, Channel 1 from Sample 1 (CR080-78-91-91 RM) of CR080-MONI-03JUNE09-B02.wiff (Turbo S...)

| Peak | Time (min) | Area (counts) | %Area   | Height   |
|------|------------|---------------|---------|----------|
| 1    | 0.6134     | 2.0834e7      | 85.7984 | 1.8207e6 |
| 2    | 0.8282     | 4.1998e5      | 1.7296  | 9.5119e4 |
| 3    | 3.5558     | 3.0285e6      | 12.4720 | 5.8564e5 |

Peak List for "Detector A, Channel 2 from Sample 1 (CR080-78-91-91 RM) of CR080-MONI-03JUNE09-B02.wiff (Turbo S...)

| Peak | Time (min) | Area (counts) | %Area   | Height    |
|------|------------|---------------|---------|-----------|
| 1    | 0.5948     | 2.5812e4      | 0.6102  | 5497.6043 |
| 2    | 3.5545     | 4.2043e6      | 99.3898 | 7.6826e5  |



Sample Name : CR080-78-91-91A  
 Sample ID : CR080-78-91-91A  
 Column : Gemini C-18 (150 x 4.6 mm)  
 Vial # : 61  
 Inj. Volume : 25 uL  
 Tray # : 1  
 Acquired by : AVINASH

Data File Name : 15-02-10\_CR080-78-91-91A\_03.lcd  
 Method File Name : GENERAL\_B2.lcm  
 Batch File Name : 150210.lcb  
 Data Acquired : 2/15/2010 2:48:06 PM  
 Data Processed : 2/15/2010 3:13:10 PM  
 Ref.No.: DI/A0257/95

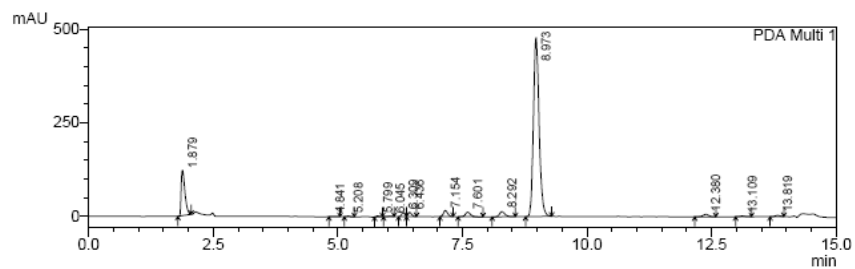

1 PDA Multi 1/246nm 4nm

PeakTable

| Peak# | Ret. Time | Area    | Area % | Height |
|-------|-----------|---------|--------|--------|
| 1     | 1.88      | 634154  | 12.87  | 121353 |
| 2     | 4.84      | 1957    | 0.04   | 296    |
| 3     | 5.21      | 7937    | 0.16   | 1666   |
| 4     | 5.80      | 11282   | 0.23   | 2390   |
| 5     | 6.04      | 4739    | 0.10   | 752    |
| 6     | 6.31      | 53977   | 1.10   | 11220  |
| 7     | 6.44      | 59610   | 1.21   | 11560  |
| 8     | 7.15      | 95106   | 1.93   | 16623  |
| 9     | 7.60      | 87951   | 1.79   | 12261  |
| 10    | 8.29      | 101689  | 2.06   | 14042  |
| 11    | 8.97      | 3778861 | 76.71  | 478496 |
| 12    | 12.38     | 53693   | 1.09   | 6633   |
| 13    | 13.11     | 12458   | 0.25   | 1831   |
| 14    | 13.82     | 22763   | 0.46   | 3460   |
| Total |           | 4926178 | 100.00 | 682582 |

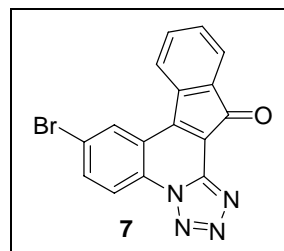

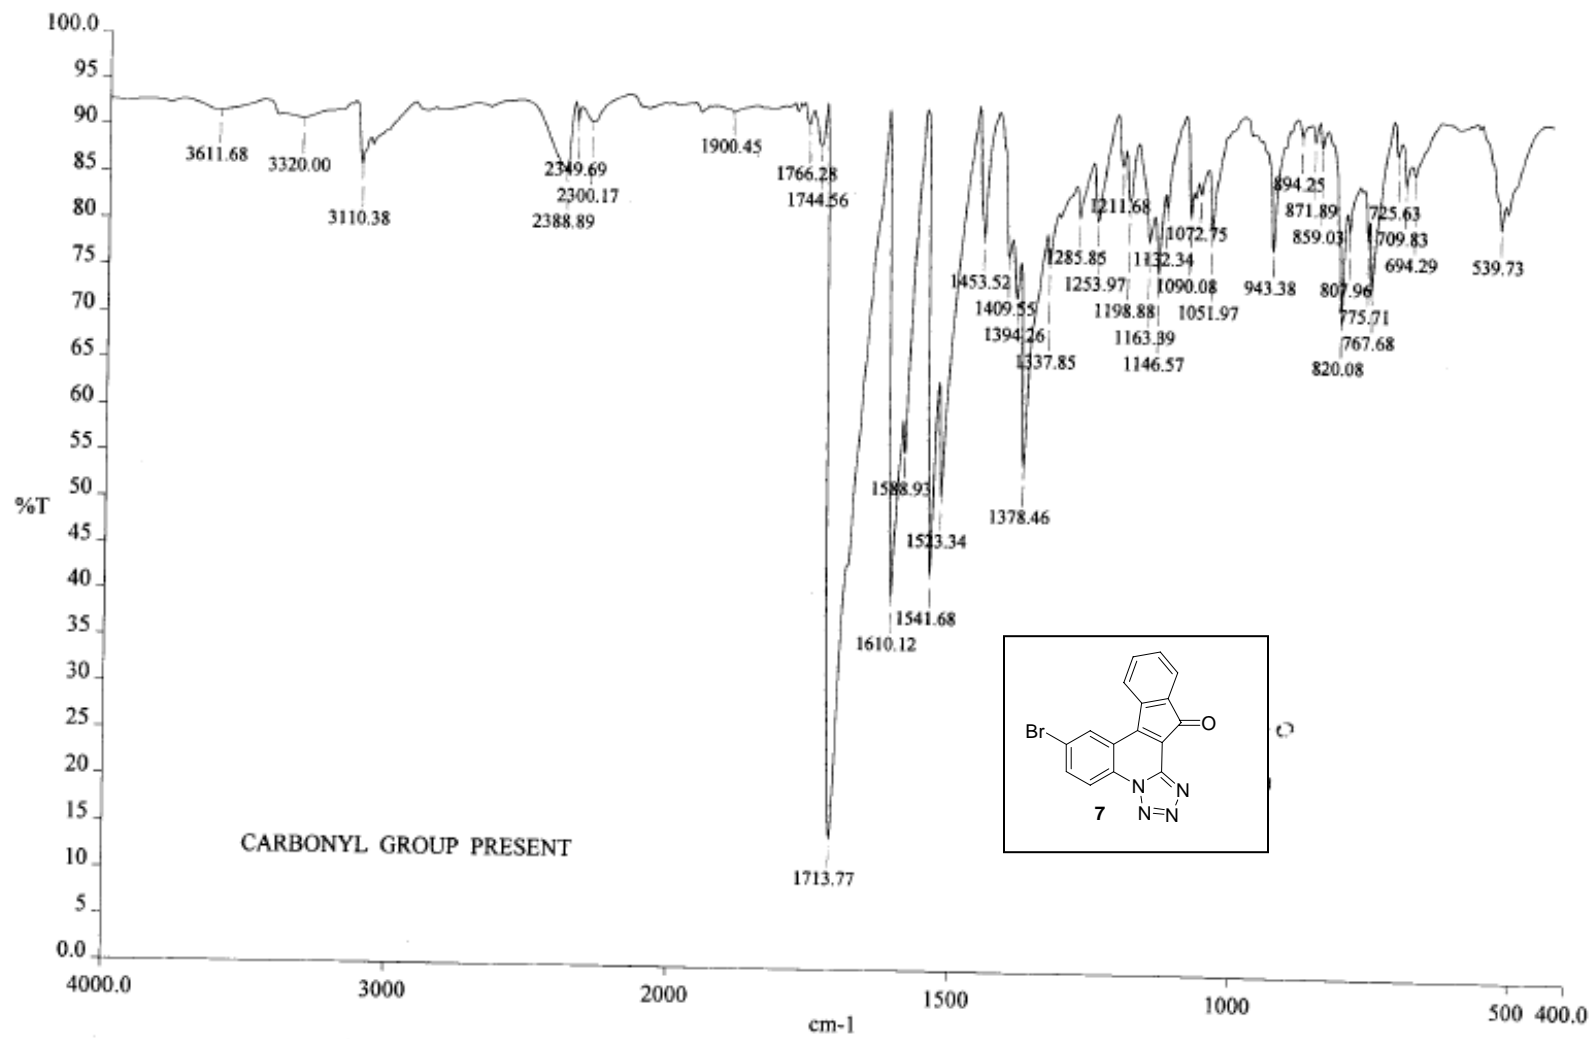

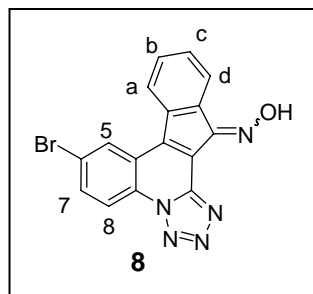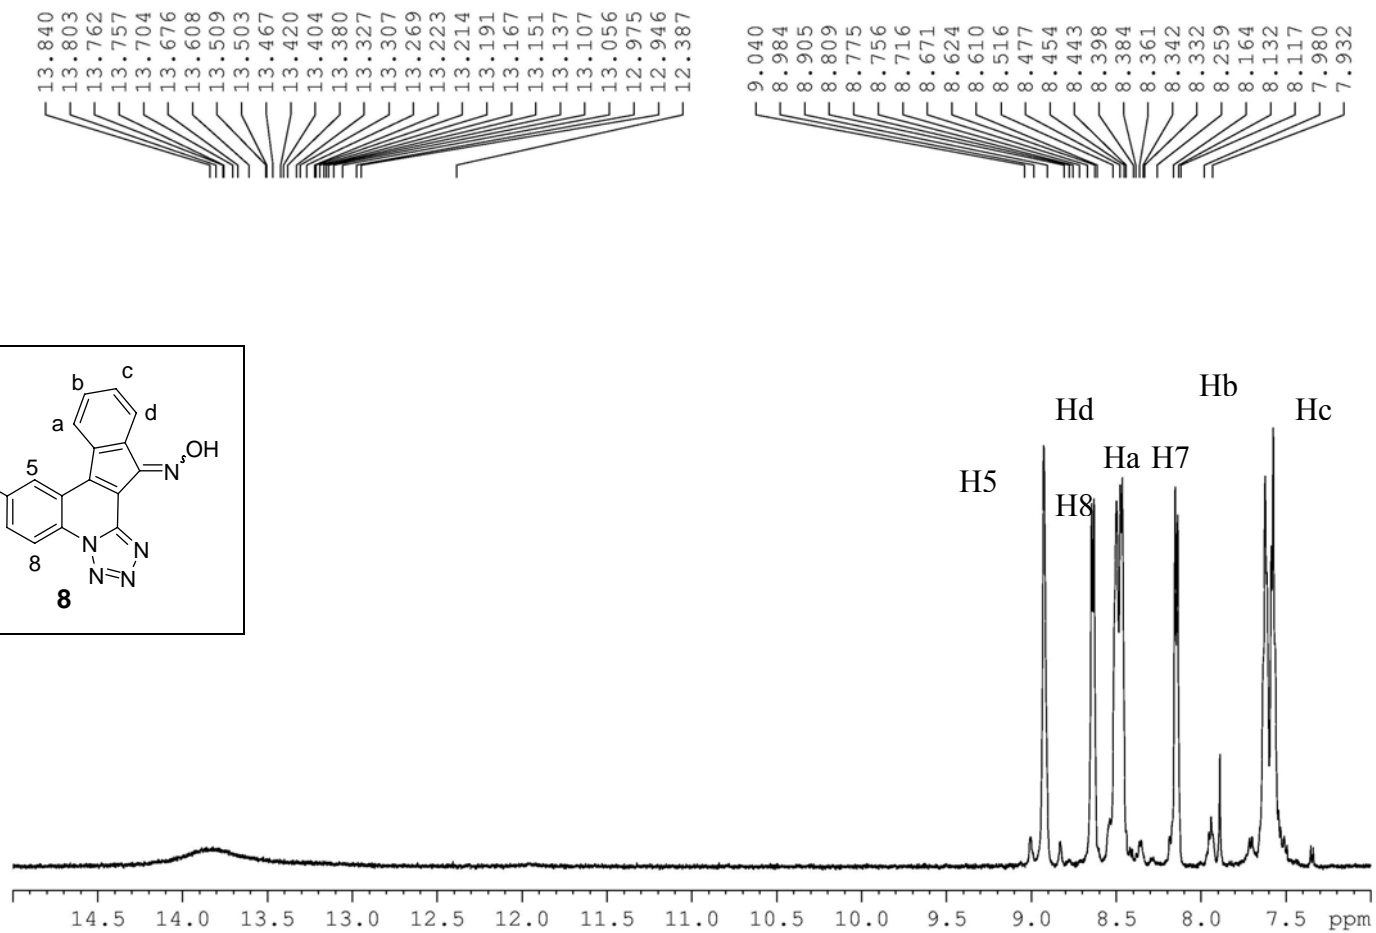

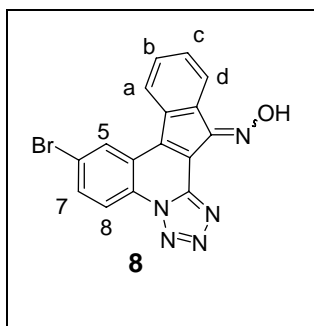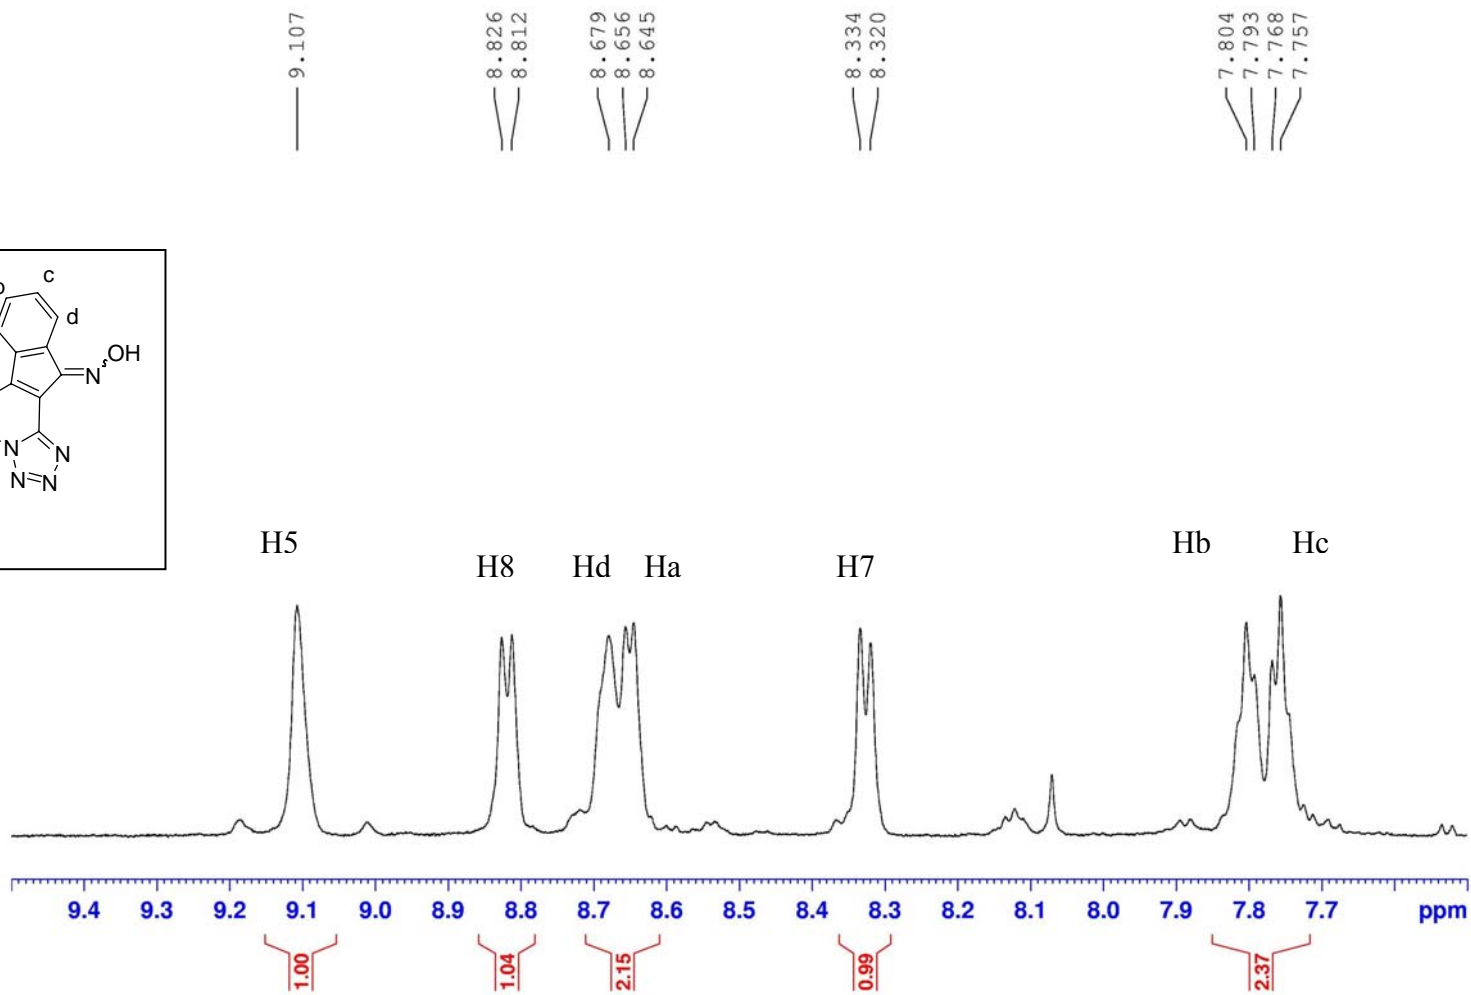

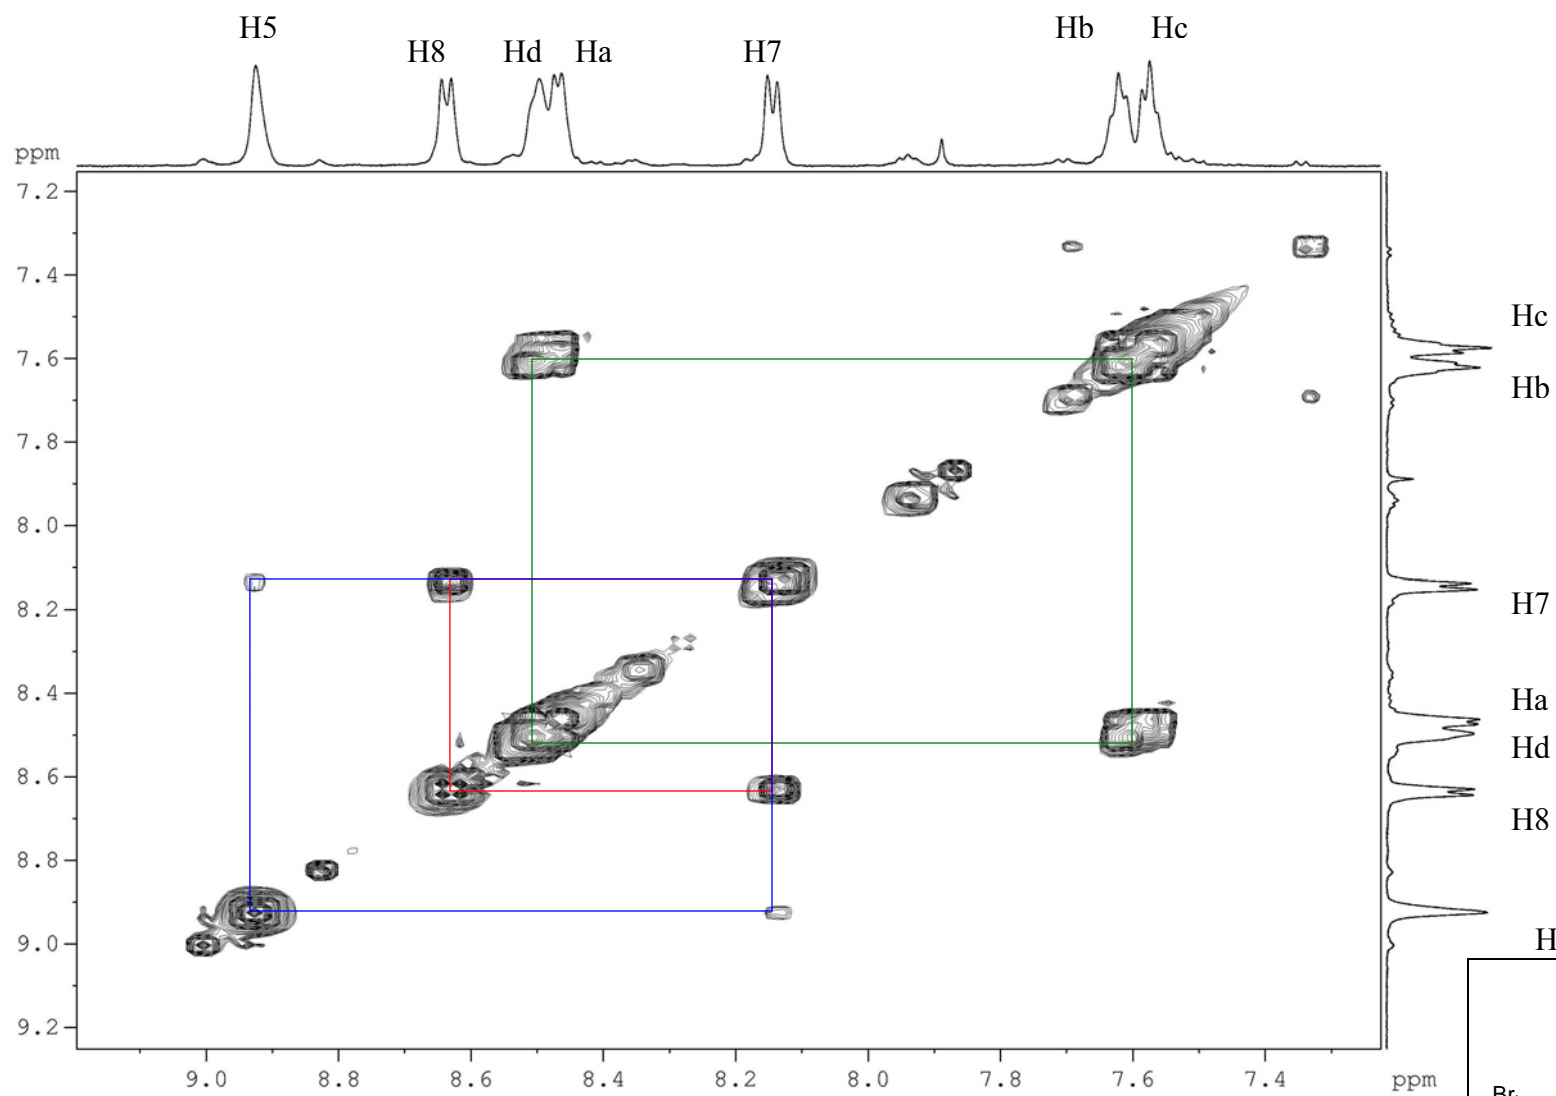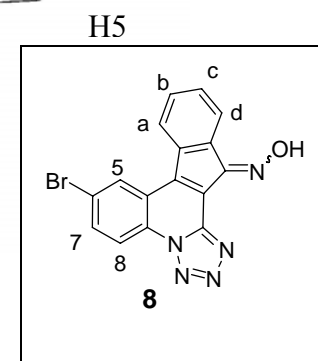

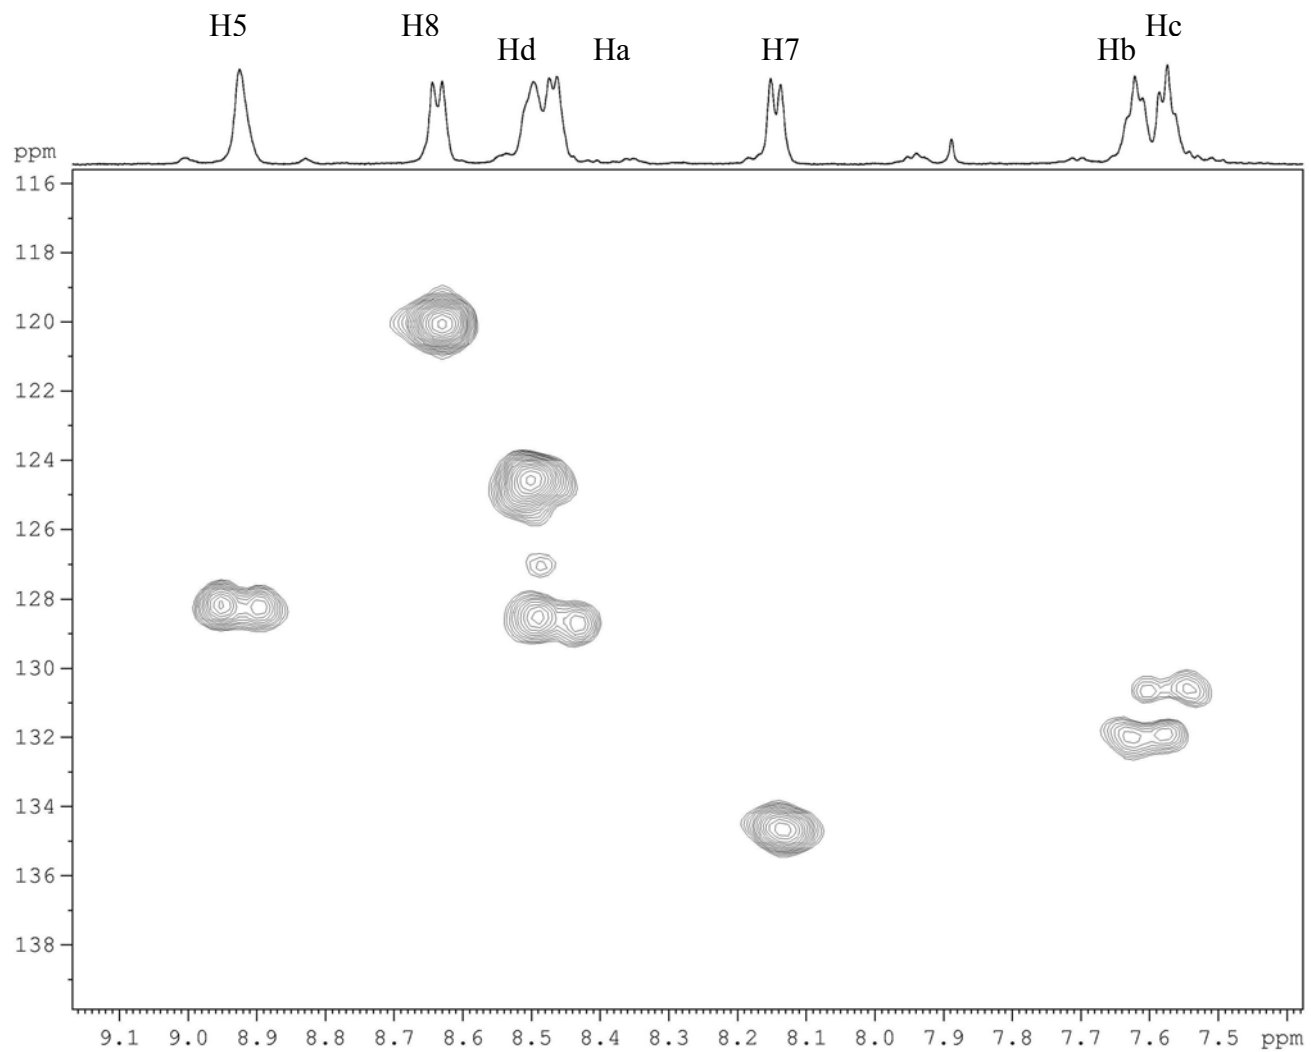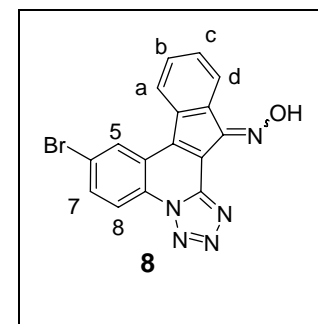

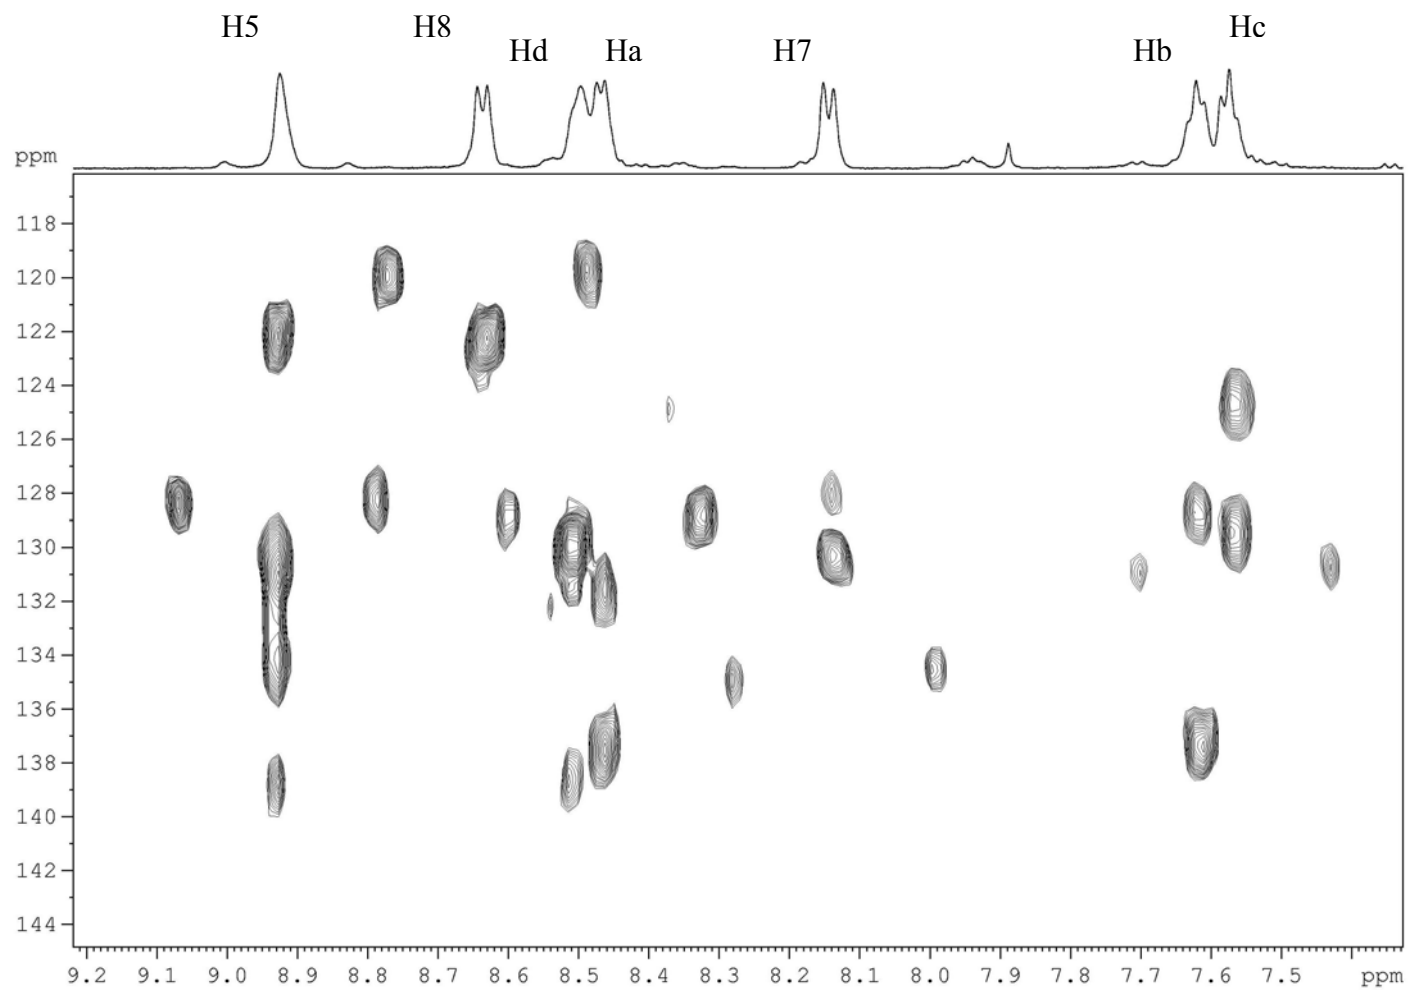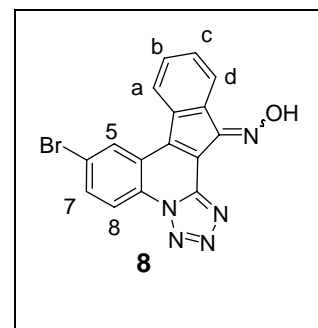

Sample Name: CR080-78-199-195B

Acq. Time: 10:30

Acq. Date: Thursday, October 29, 2009

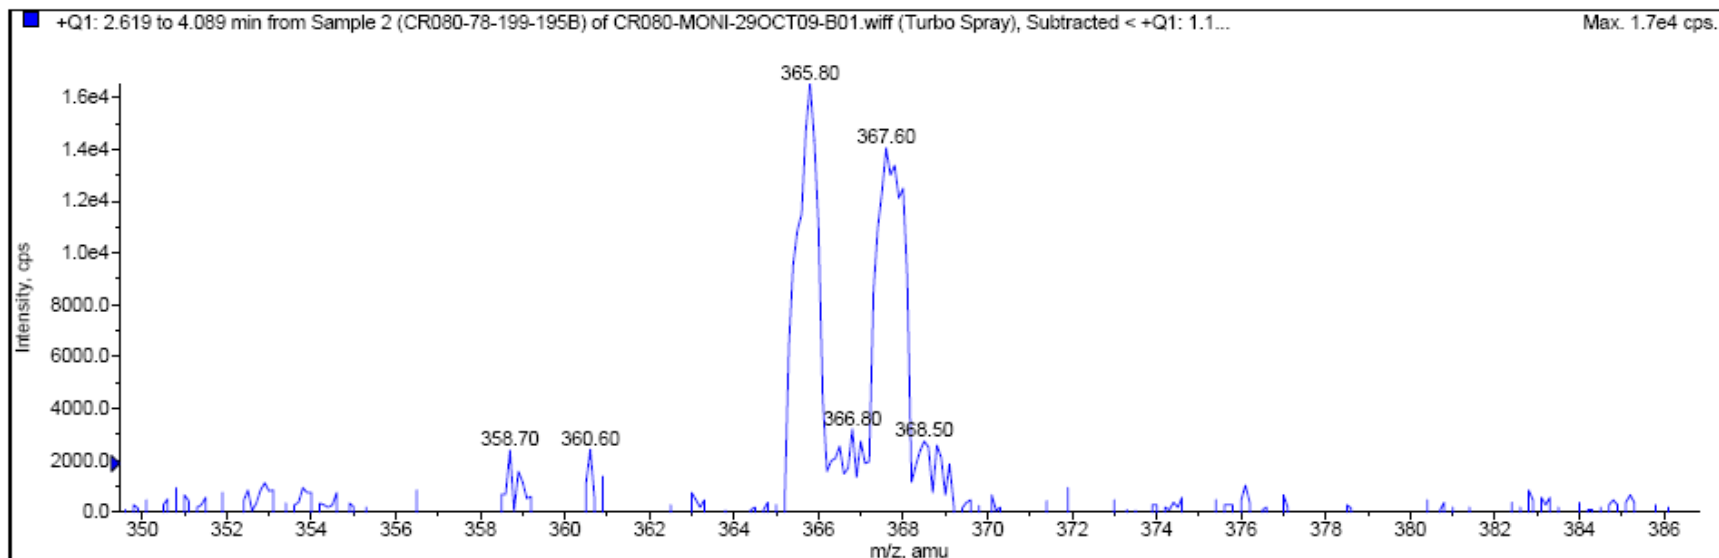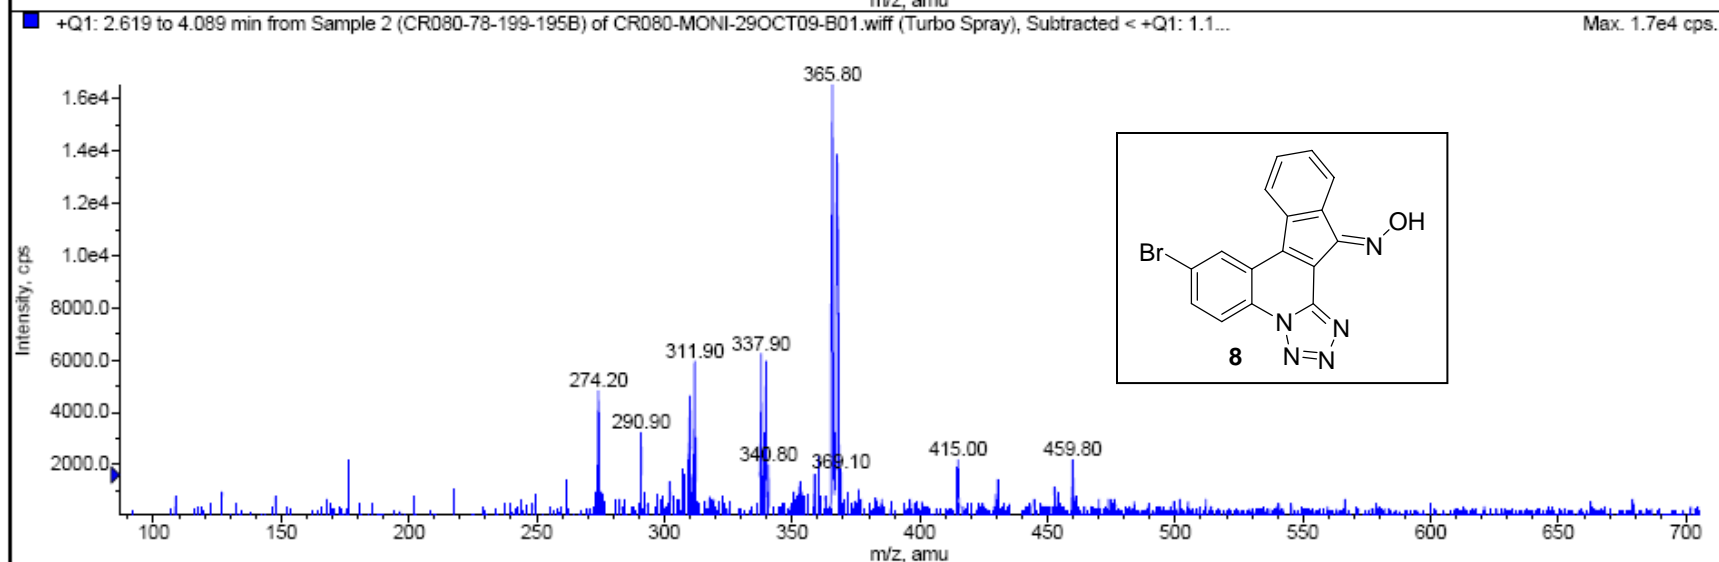

\*Sample Comment: [M+H]366

Expected

\*\*Analyzed By :

\*\*Checked By :



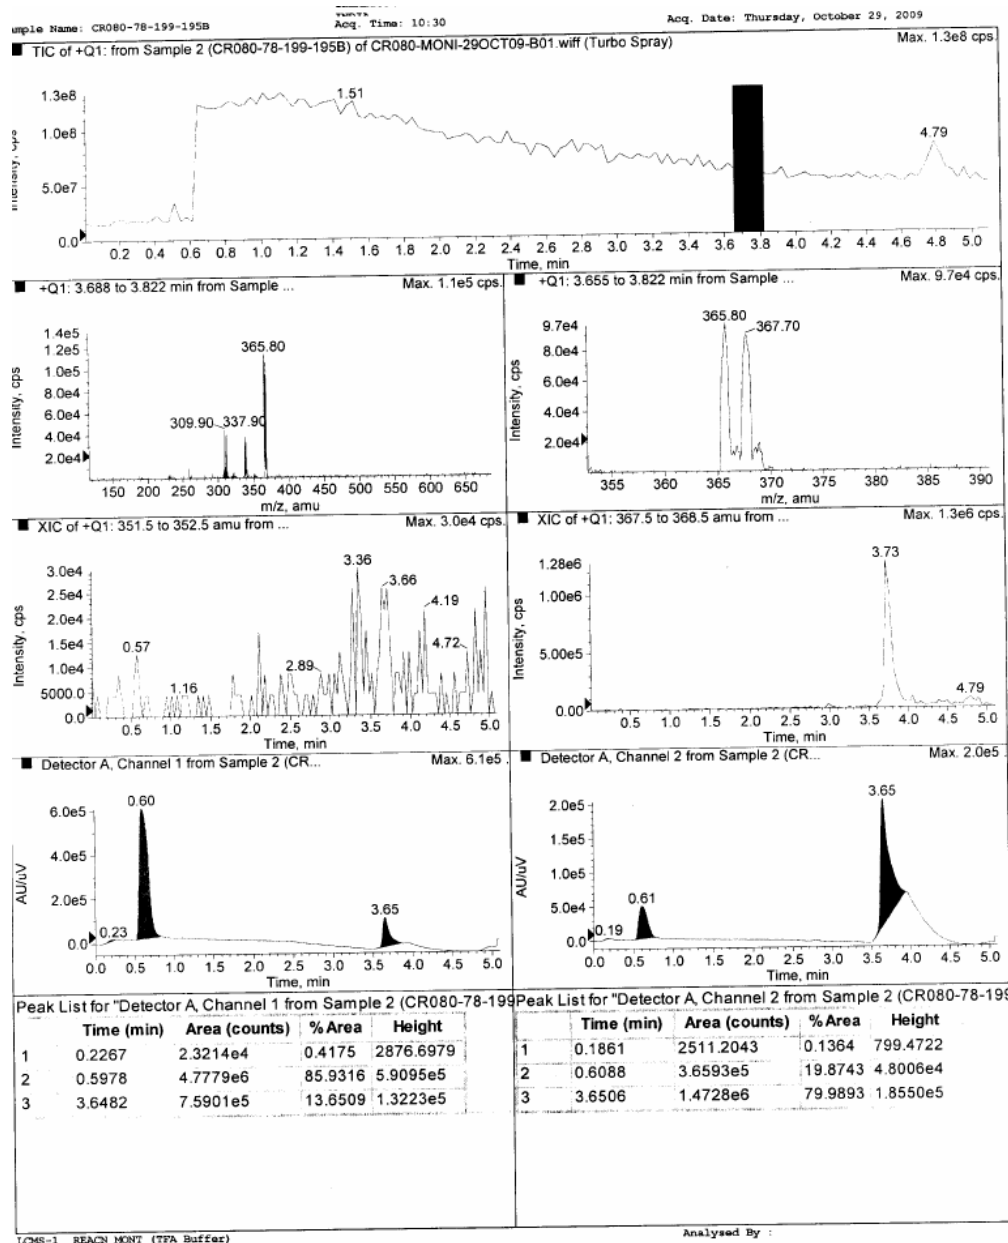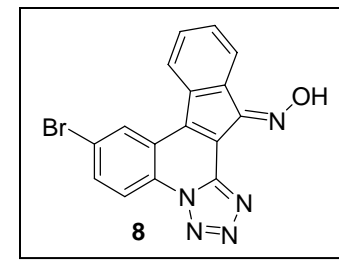

```

=====
Sample:CR080-78-199-195 B                                     ->
Column: XTERRA RP(250X4.6)mm 5µ
Injection date   : Mon, 15. Feb. 2010                       Location   : Vial 22
Sample Name     : CR080-78-199-195 B                       Inj. No.   : 1
Acq Operator    : BHUSHAN                                  Inj. Vol.  : 3 µl
Analysis Method : C:\CHEM32\2\METHODS\UPLC_GENERAL_GRAD_1.M
Last Changed    : Mon, 15. Feb. 2010,
Acq. Method     : C:\Chem32\2\DATA\FEB-10\150210A 2010-02-15 08-51-54\
                  UPLC_GENERAL_GRAD_1.M
Method ref      : DI/A0257/92
=====

```

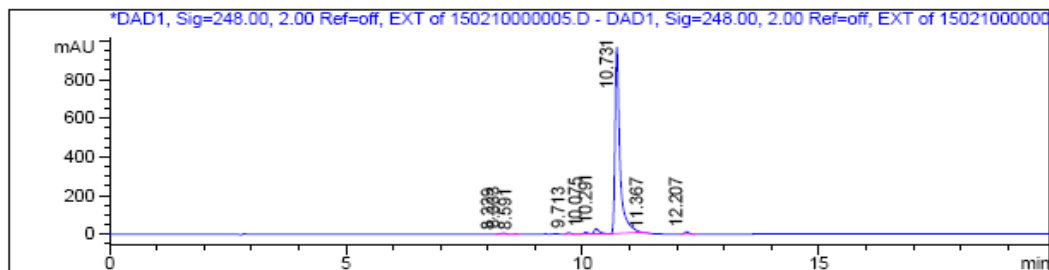

DAD1, Sig=248.00, 2.00 Ref=off, EXT

| Peak # | RT (Min) | Width (Min) | Area    | Area % |
|--------|----------|-------------|---------|--------|
| 1      | 8.229    | 0.070       | 5.980   | 0.080  |
| 2      | 8.333    | 0.083       | 31.004  | 0.416  |
| 3      | 8.591    | 0.078       | 6.119   | 0.082  |
| 4      | 9.713    | 0.096       | 45.518  | 0.611  |
| 5      | 10.075   | 0.086       | 48.980  | 0.657  |
| 6      | 10.291   | 0.127       | 208.882 | 2.802  |
| 7      | 10.731   | 0.121       | 7.020e3 | 94.185 |
| 8      | 11.367   | 0.074       | 8.972   | 0.120  |
| 9      | 12.207   | 0.106       | 78.009  | 1.047  |

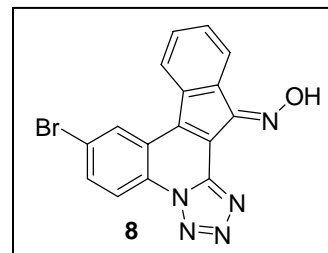

\*\*\* End of Report\*\*\*

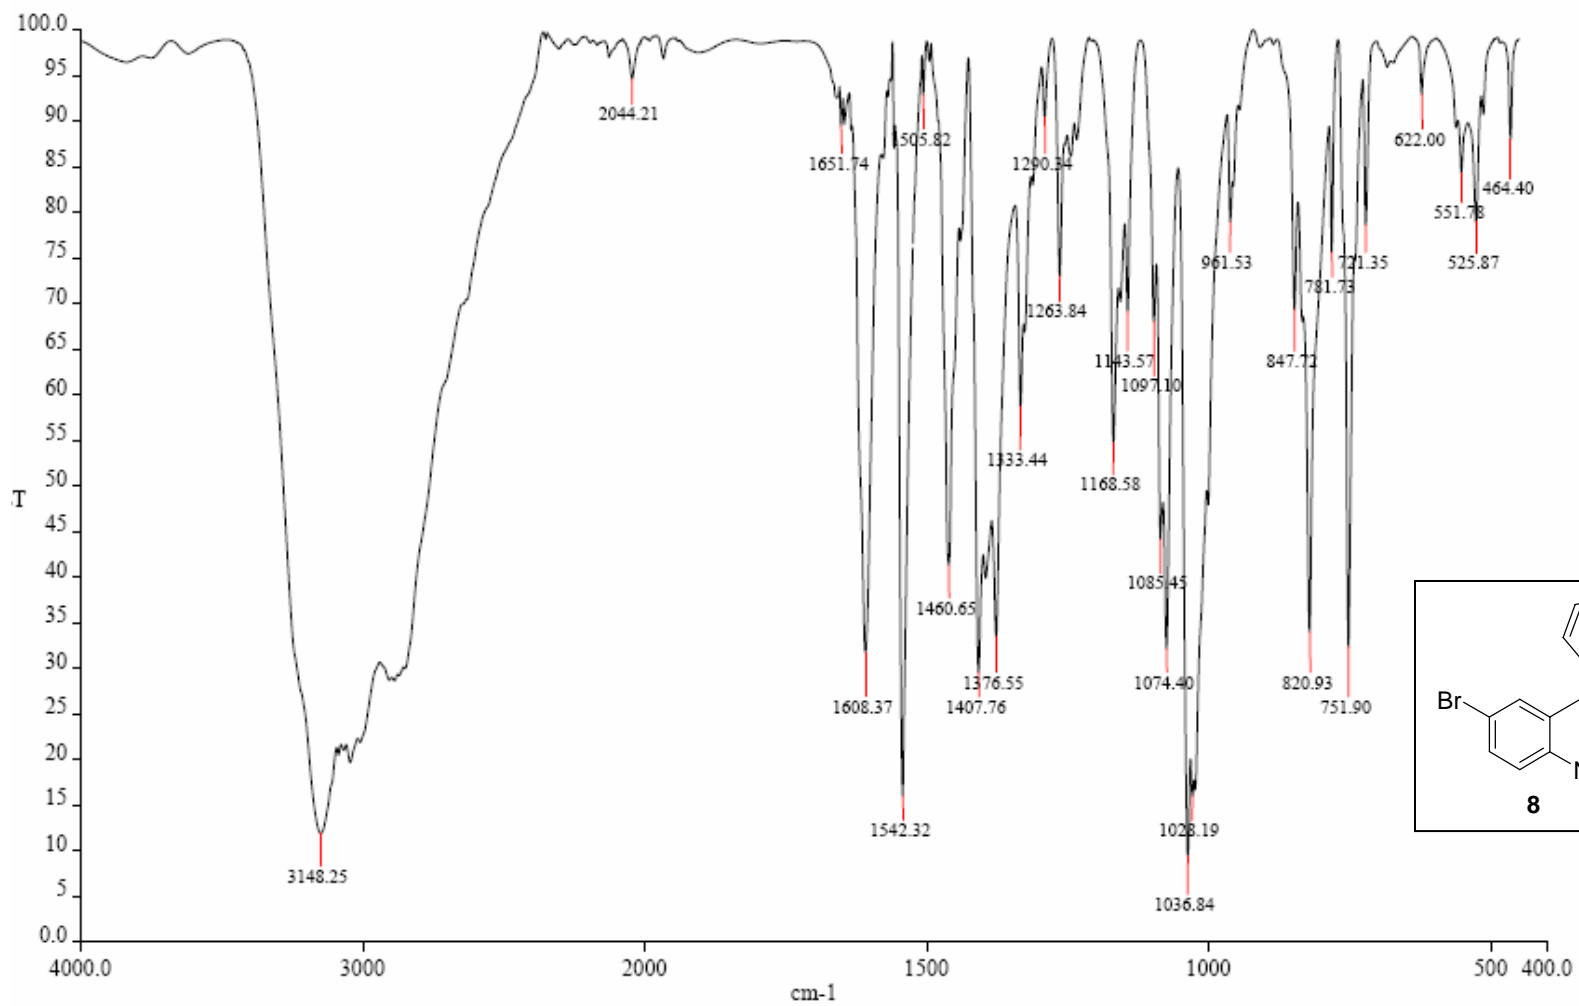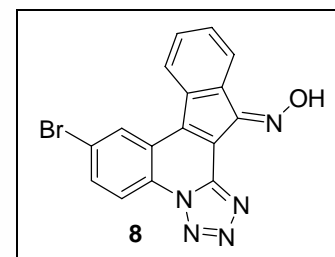

NAME CR080-07-09-09 LOWER SPOT  
 EXPNO 1  
 PROCNO 1  
 Date\_ 20091105  
 Time\_ 9.54  
 INSTRUM spect  
 PROBHD 5 mm DUL 13C-1  
 PULPROG zg30  
 TD 32768  
 SOLVENT DMSO  
 NS 4  
 DS 0  
 SWH 8278.148 Hz  
 FIDRES 0.232629 Hz  
 AQ 1.9792372 sec  
 RG 845.1  
 DW 66.400 usec  
 DE 6.00 usec  
 TE 292.3 K  
 D1 3.0000000 sec  
 TDO 1  
 ----- CHANNEL f1 -----  
 NUC1 1H  
 P1 12.50 usec  
 PL1 -1.00 dB  
 SFO1 400.1324710 MHz  
 SI 18384  
 SF 400.1300015 MHz  
 WDW EM  
 SSB 0  
 LB 0.30 Hz  
 GB 0  
 PC 0.50

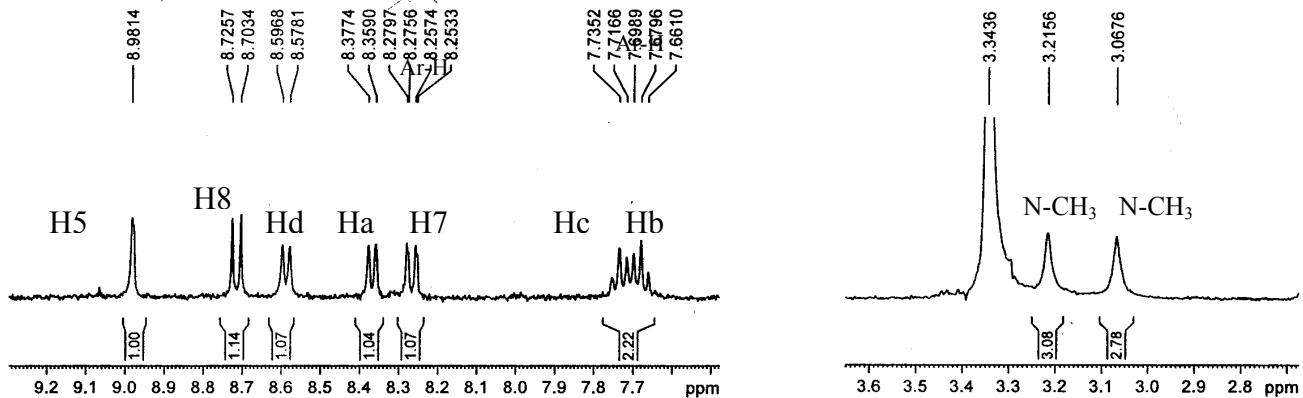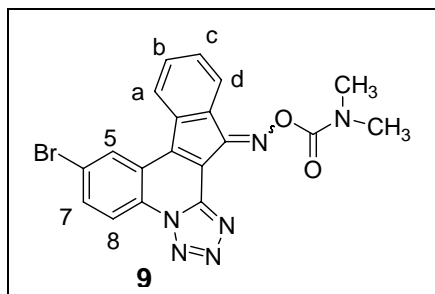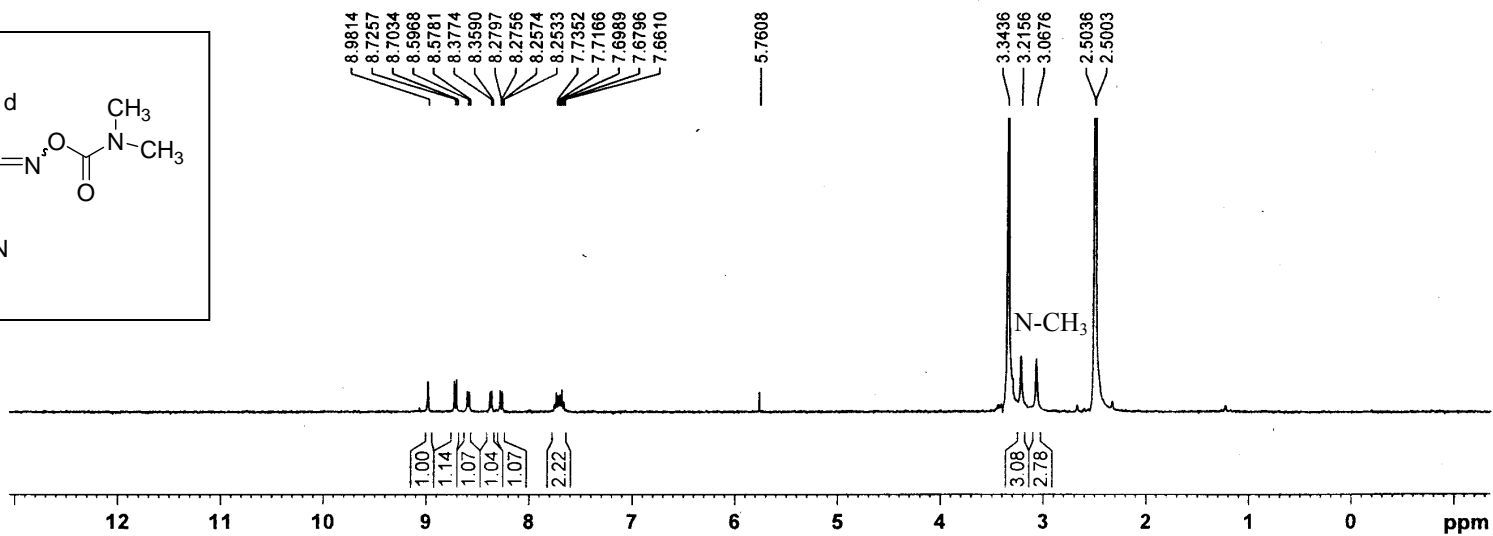

9.009  
9.006

8.734  
8.719

8.621  
8.608

8.401  
8.389

8.282  
8.278  
8.267  
8.264

7.756  
7.754  
7.743  
7.709  
7.697

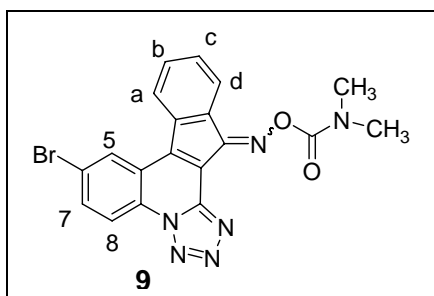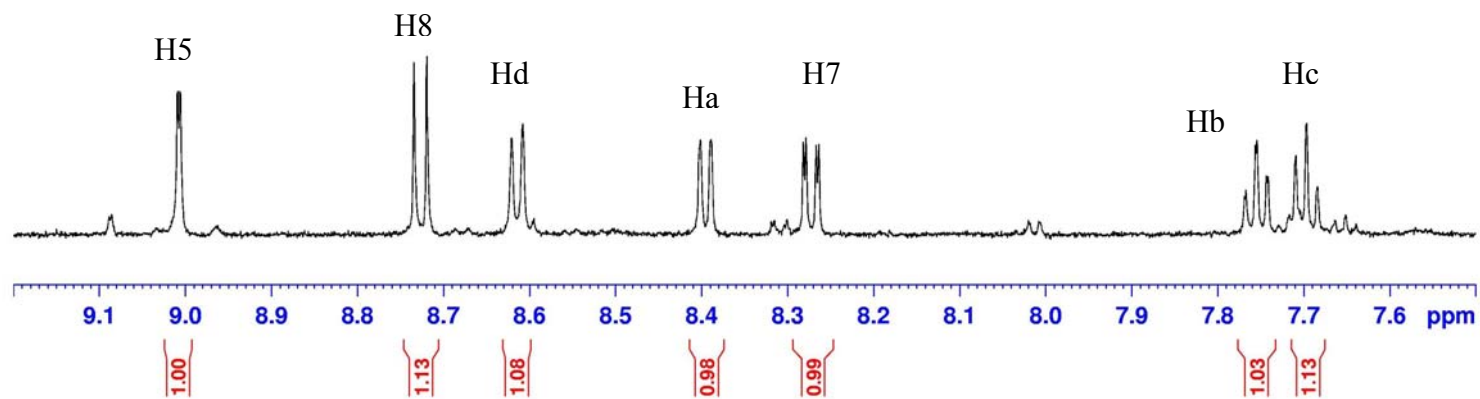

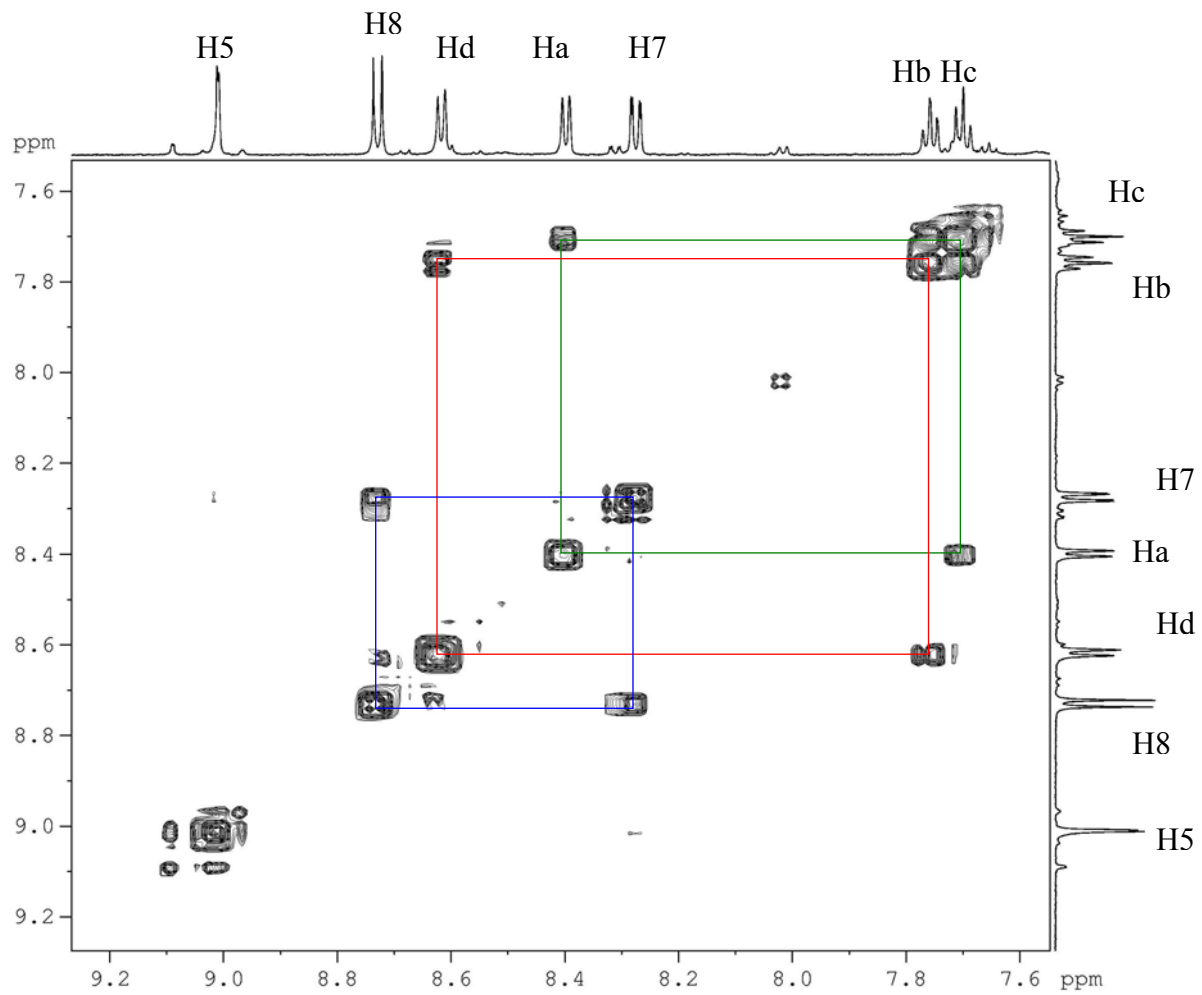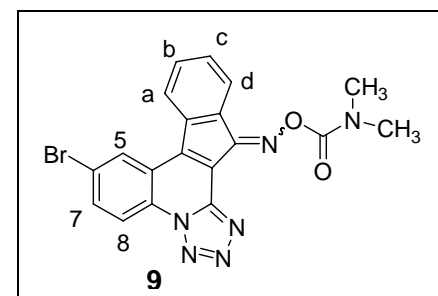

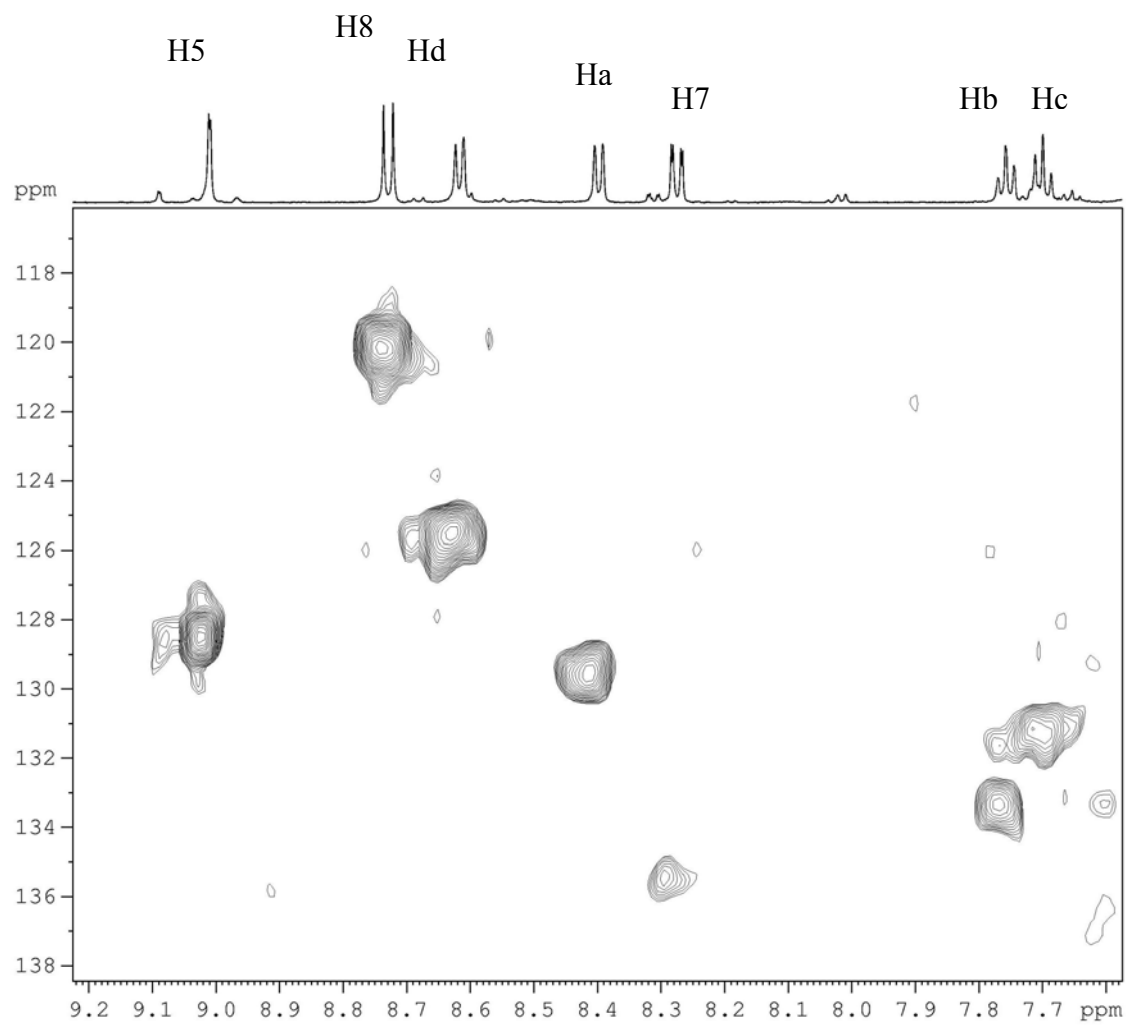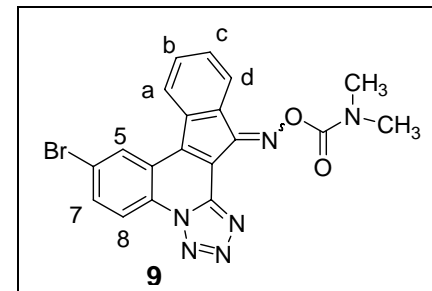

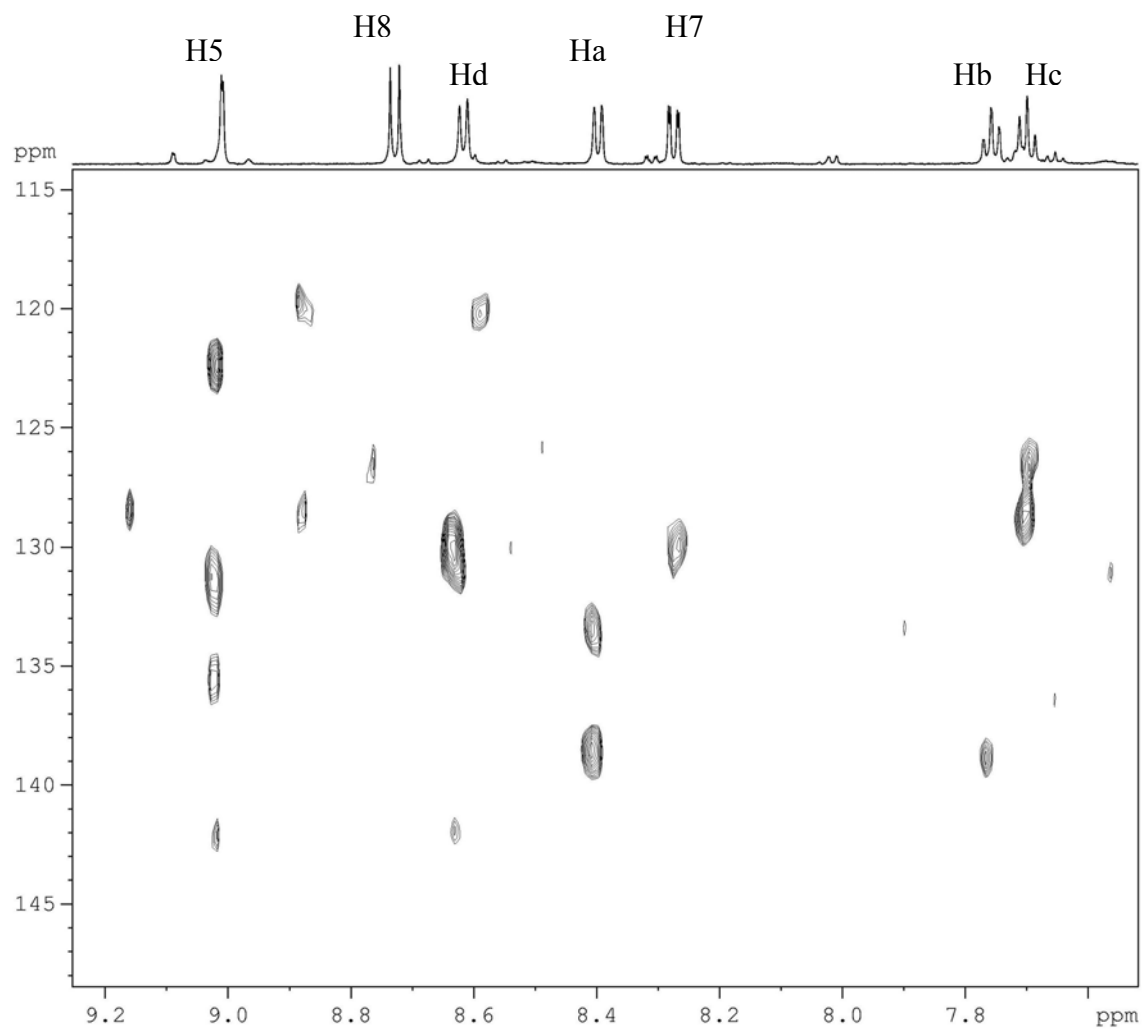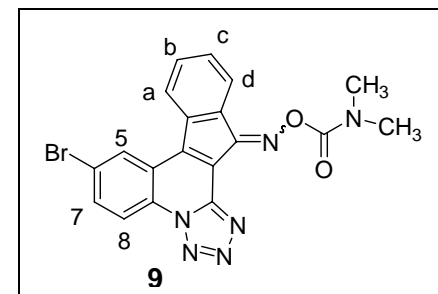



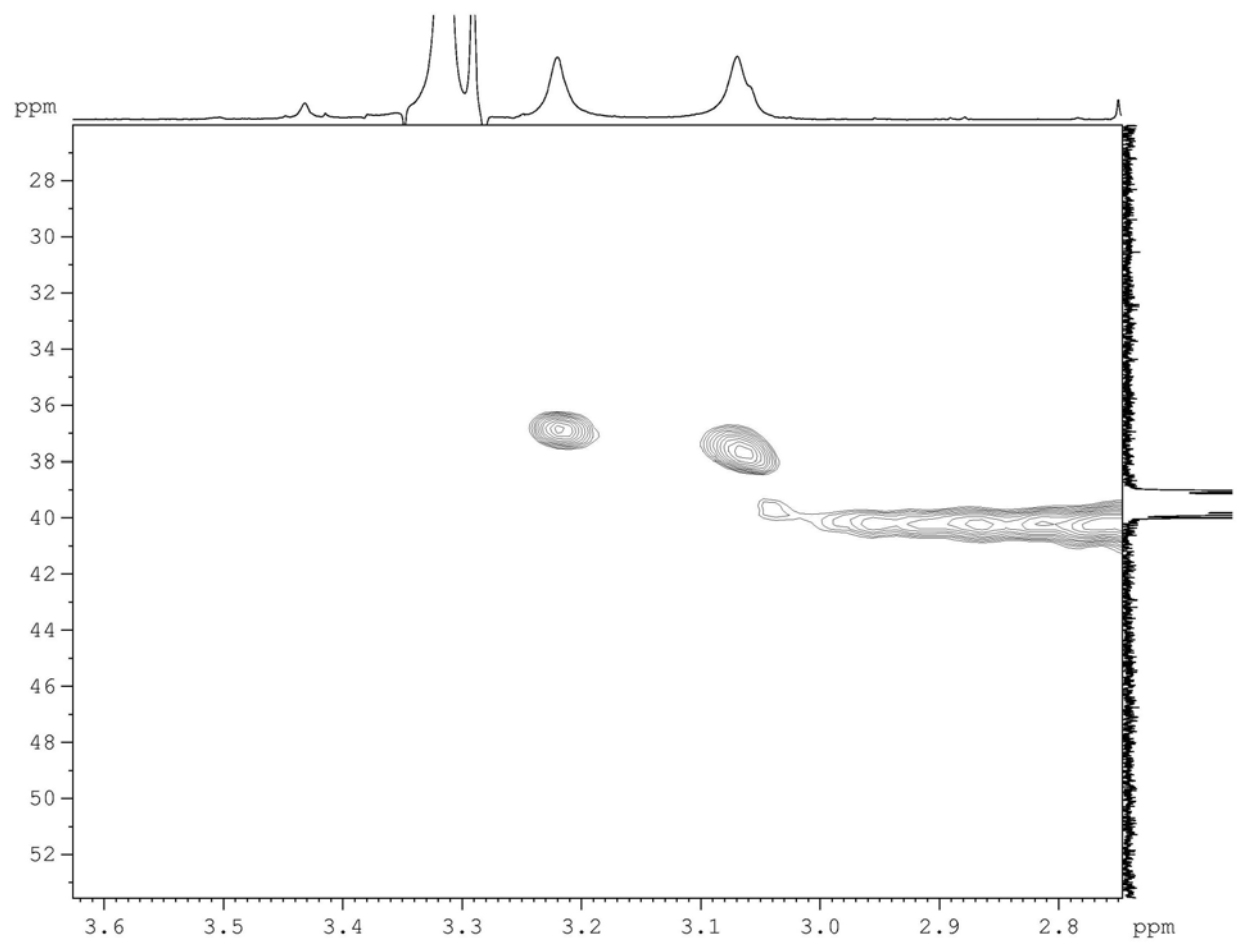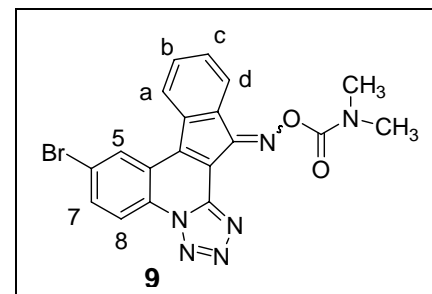

Sample Name: CR080-97-09-09 LOWER SPOT

Acq. Time: 11:08

Acq. Date: Thursday, November 05, 2009

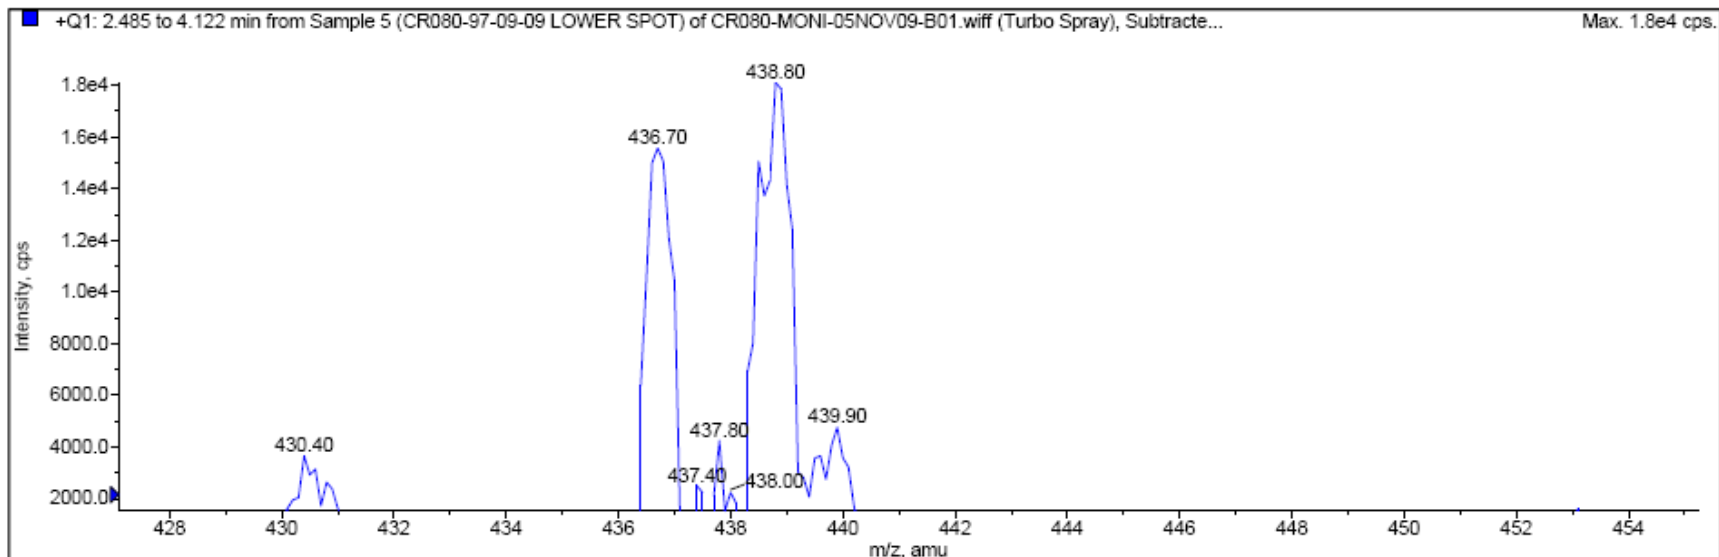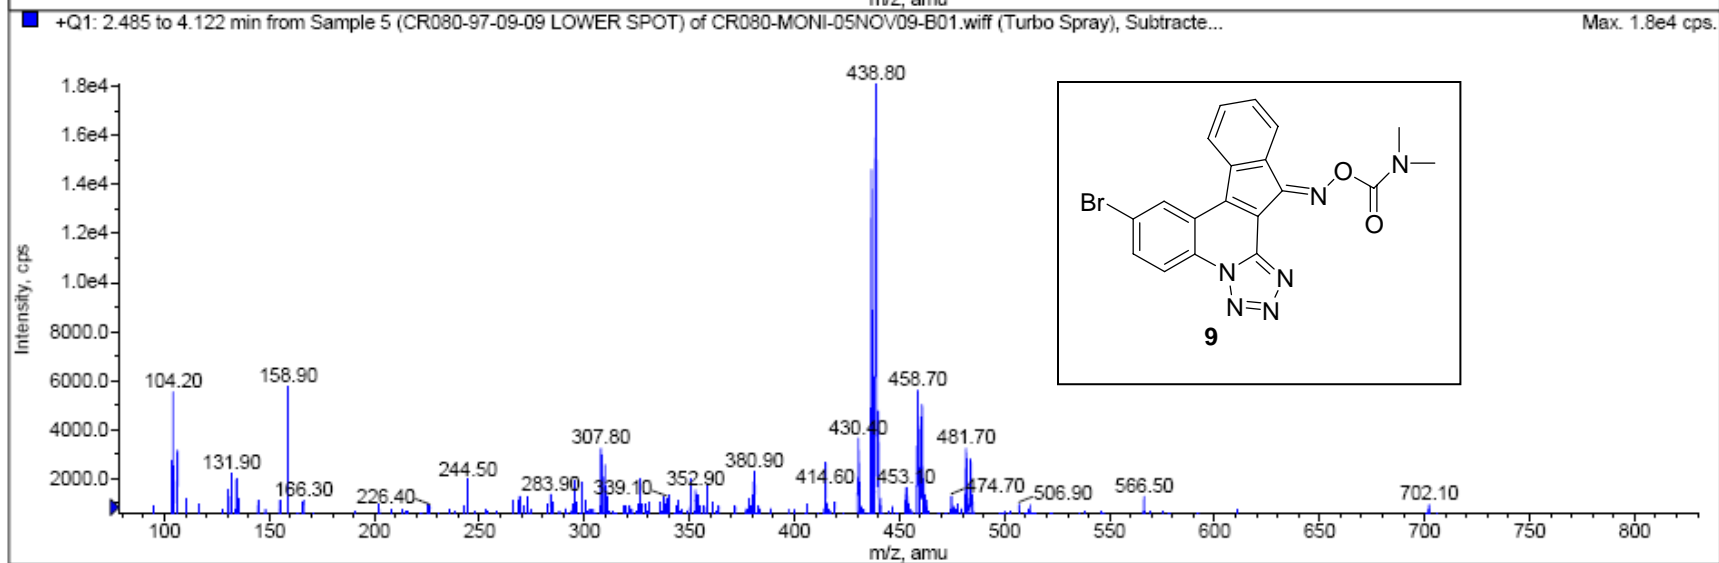

\*Sample Comment: [M+H] 437

Expected

\*\*Analyzed By :

\*\*Checked By :

Sample Name: CR080-97-09-09 LOWER SPOT

Acq. Time: 11:08

Acq. Date: Thursday, November 05, 2009

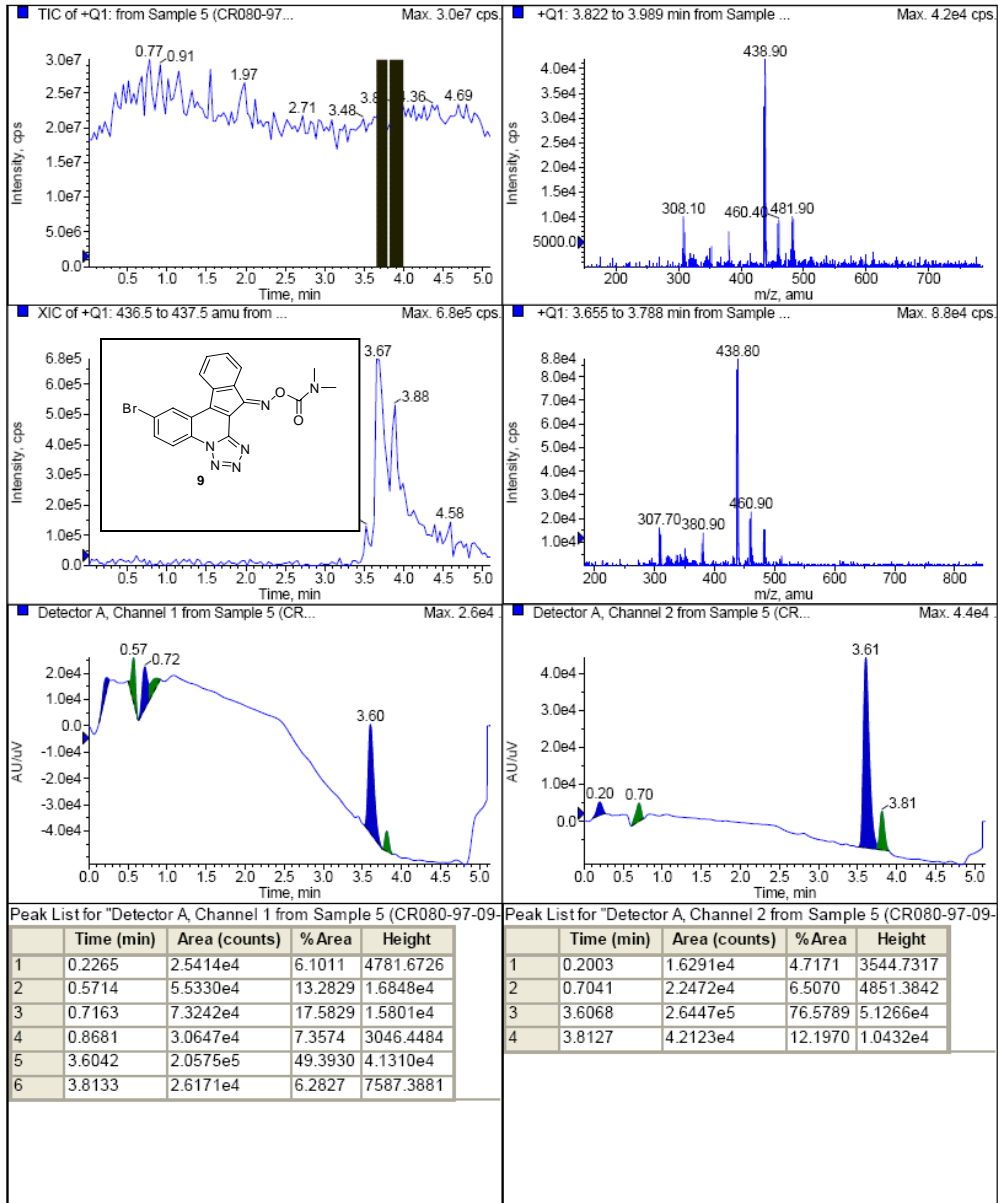

LCMS-1 REACN MONT (TFA Buffer)

PEAK MERGED

Analysed By :

Channel 1 at wavelength 220nm, Channel 2 at wavelength 260 nm

```

=====
Sample:CR080-97-09-09LOWER SPOT                                     ->
Column: XTERRA RP (250X4.6)mm 5µ
Injection date   : Mon, 15. Feb. 2010                               Location   :      Vial 23
Sample Name     : CR080-97-09-09LOWER SPOT                         Inj. No.   :      1
Acq Operator    : BHUSHAN                                           Inj. Vol.  :     30 µl
Analysis Method : C:\CHEM32\2\METHODS\UPLC_GENARAL_GRAD_59.M
Last Changed    : Mon, 15. Feb. 2010,
Acq. Method     : C:\Chem32\2\DATA\FEB-10\150210B 2010-02-15 14-00-21\
                  UPLC_GENARAL_GRAD_59.M
Method ref      :DI/A0257/93
=====

```

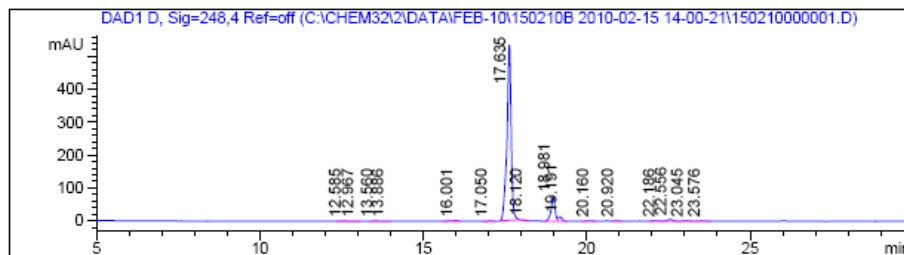

DAD1 D, Sig=248,4 Ref=off

| Peak # | RT (Min) | Width (Min) | Area    | Area % |
|--------|----------|-------------|---------|--------|
| 1      | 12.585   | 0.116       | 7.906   | 0.138  |
| 2      | 12.967   | 0.179       | 8.916   | 0.156  |
| 3      | 13.560   | 0.130       | 13.794  | 0.241  |
| 4      | 13.886   | 0.176       | 6.247   | 0.109  |
| 5      | 16.001   | 0.249       | 36.225  | 0.633  |
| 6      | 17.050   | 0.152       | 10.309  | 0.180  |
| 7      | 17.635   | 0.149       | 4.794e3 | 83.818 |
| 8      | 18.120   | 0.098       | 8.469   | 0.148  |
| 9      | 18.981   | 0.137       | 628.046 | 10.980 |
| 10     | 19.191   | 0.123       | 102.312 | 1.789  |
| 11     | 20.160   | 0.185       | 14.205  | 0.248  |
| 12     | 20.920   | 0.159       | 9.286   | 0.162  |
| 13     | 22.186   | 0.146       | 7.670   | 0.134  |
| 14     | 22.556   | 0.160       | 50.485  | 0.883  |
| 15     | 23.045   | 0.164       | 12.655  | 0.221  |
| 16     | 23.576   | 0.229       | 9.063   | 0.158  |

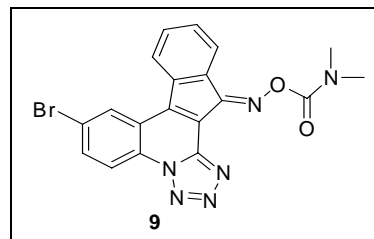

\*\*\* End of Report\*\*\*

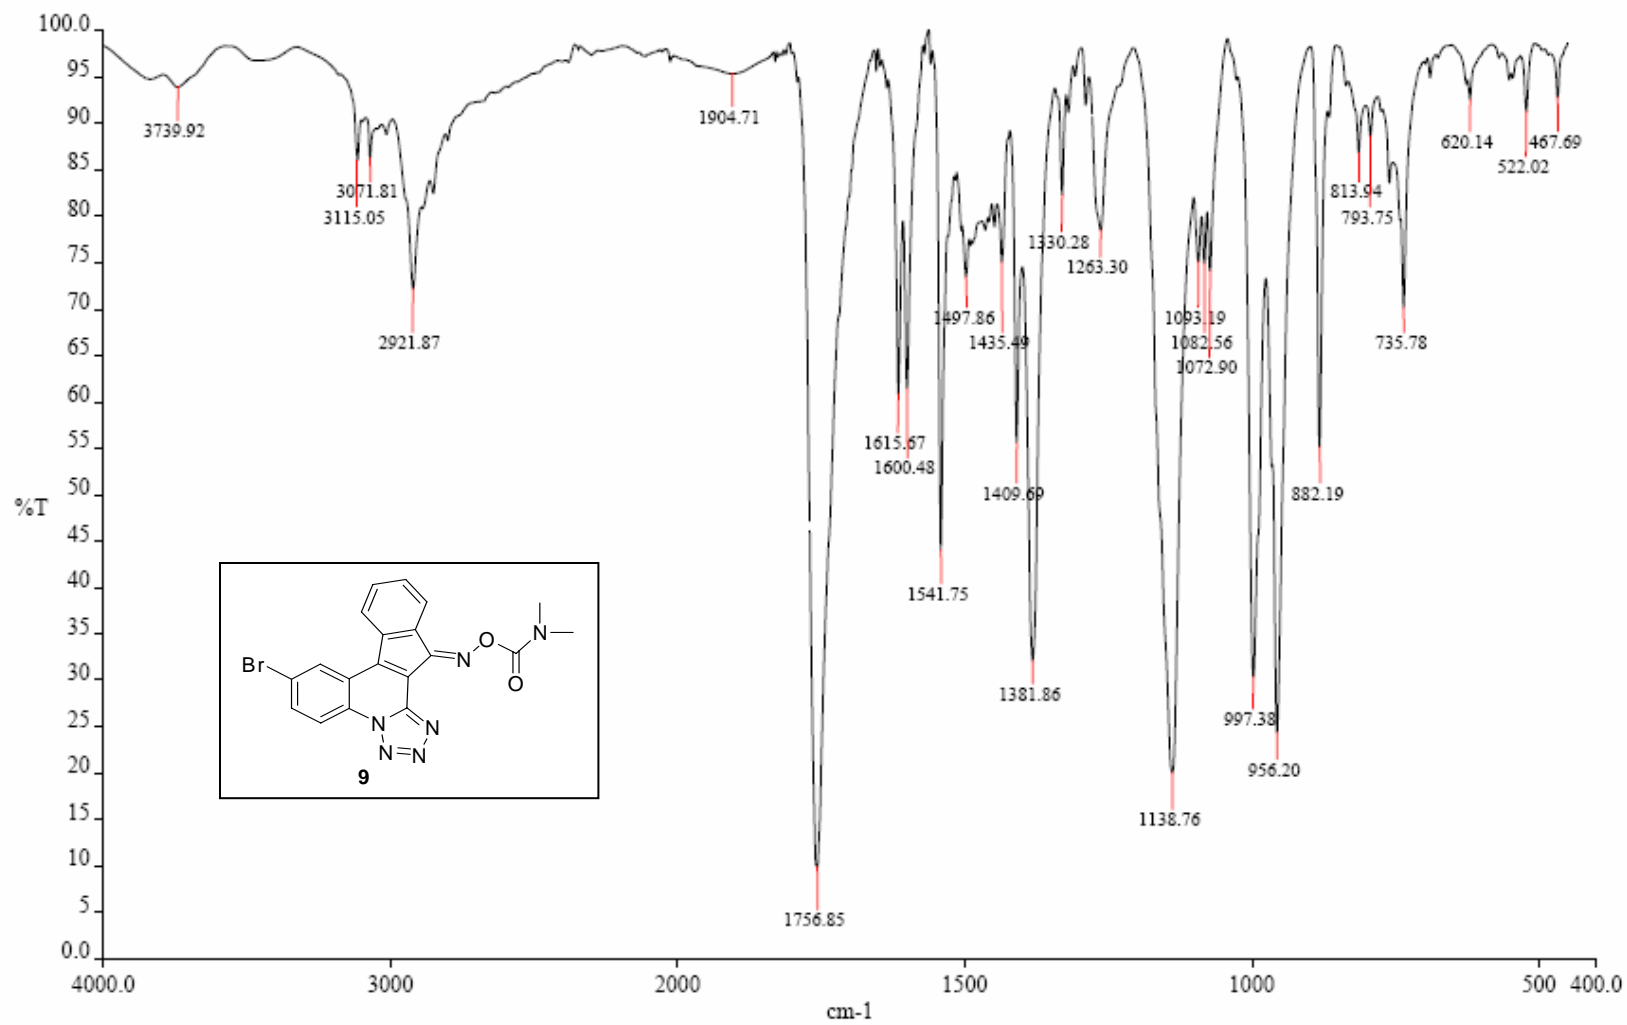

NAME CR080-78-103-103A2  
 EXPNO 1  
 PROCNO 1  
 Date\_ 20090622  
 Time 12.34  
 INSTRUM spect  
 PROBHD 5 mm DUL 13C-1  
 PULPROG zg30  
 TD 32768  
 SOLVENT DMSO  
 NS 8  
 DS 0  
 SWH 8278.146 Hz  
 FIDRES 0.252629 Hz  
 AQ 1.9792372 sec  
 RG 574.7  
 DW 60.400 usec  
 DE 8.00 usec  
 TE 297.4 K  
 D1 3.00000000 sec  
 TD0 1  
 ----- CHANNEL f1 -----  
 NUC1 1H  
 P1 12.50 usec  
 PL1 -1.00 dB  
 SFO1 400.1324710 MHz  
 SI 16384  
 SF 400.1300021 MHz  
 WDW EM  
 SSB 0  
 LB 0.30 Hz  
 GB 0  
 PC 0.50

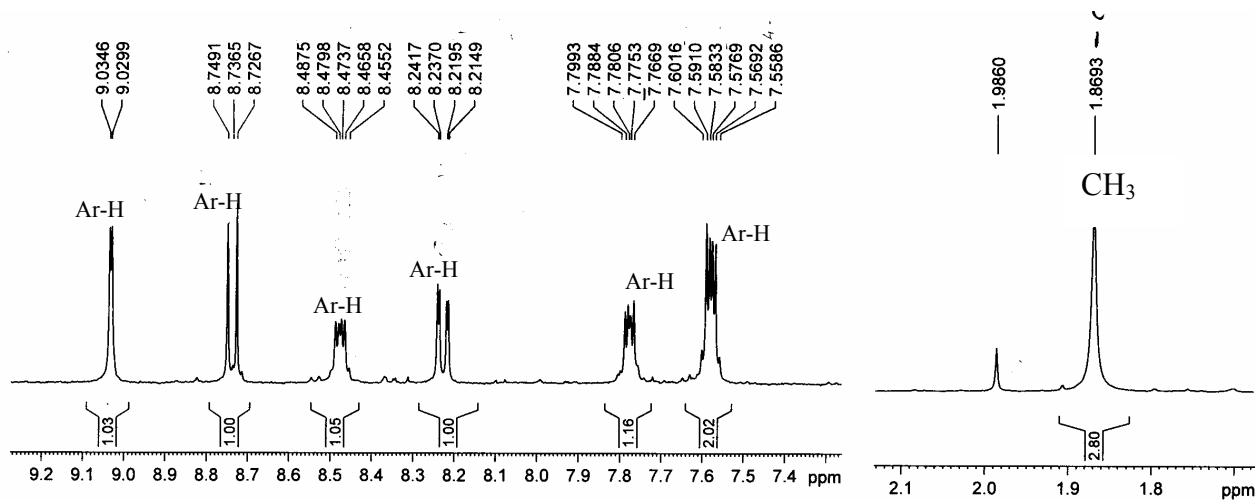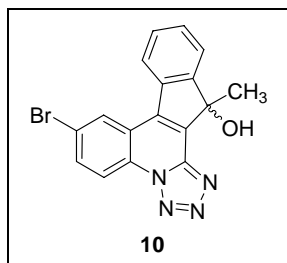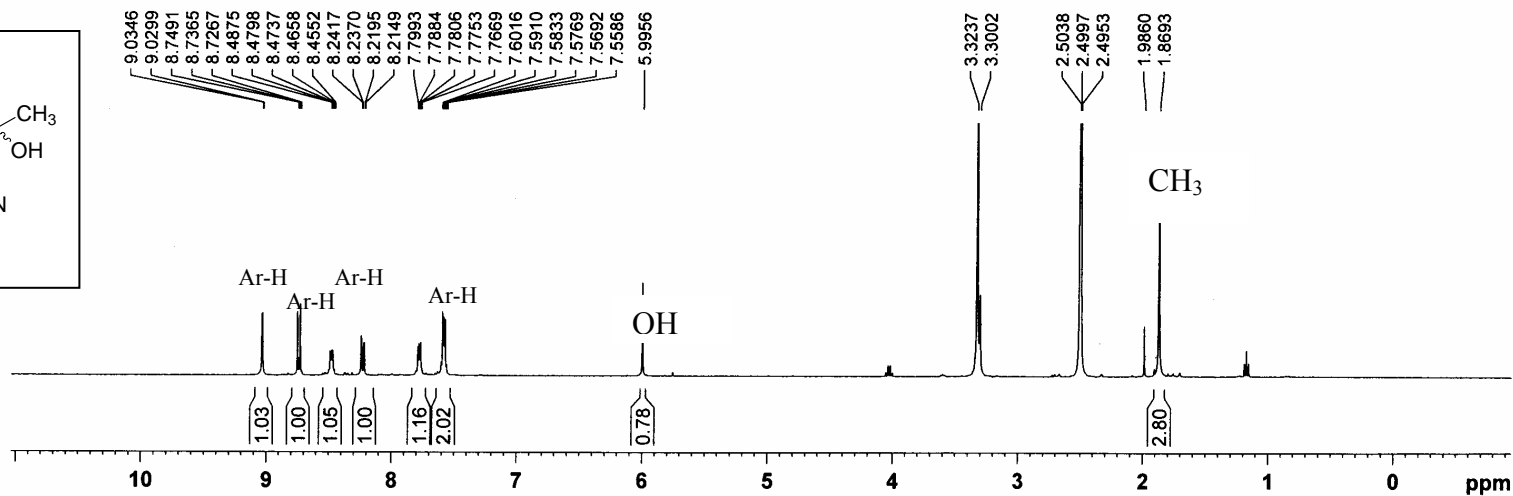

*2nd June 2009*

NAME CR086-78-103-103A2  
 EXPNO 2  
 PROCNO 1  
 Date\_ 20090623  
 Time 18.44  
 INSTRUM spect  
 PROBHD 5 mm DUL 13C-1  
 PULPROG zg30  
 TD 32768  
 SOLVENT DMSO  
 NS 8  
 DS 0  
 SWH 8278.146 Hz  
 FIDRES 0.252829 Hz  
 AQ 1.9792372 sec  
 RG 574.7  
 DW 60.400 usec  
 DE 6.00 usec  
 TE 292.4 K  
 D1 3.00000000 sec  
 TD0 1

----- CHANNEL f1 -----  
 NUC1 1H  
 P1 12.50 usec  
 PL1 -1.00 dB  
 SFO1 400.1324710 MHz  
 SI 16384  
 SF 400.1300026 MHz  
 WDW EM  
 SSB 0  
 LB 0.30 Hz  
 GB 0  
 PC 0.50

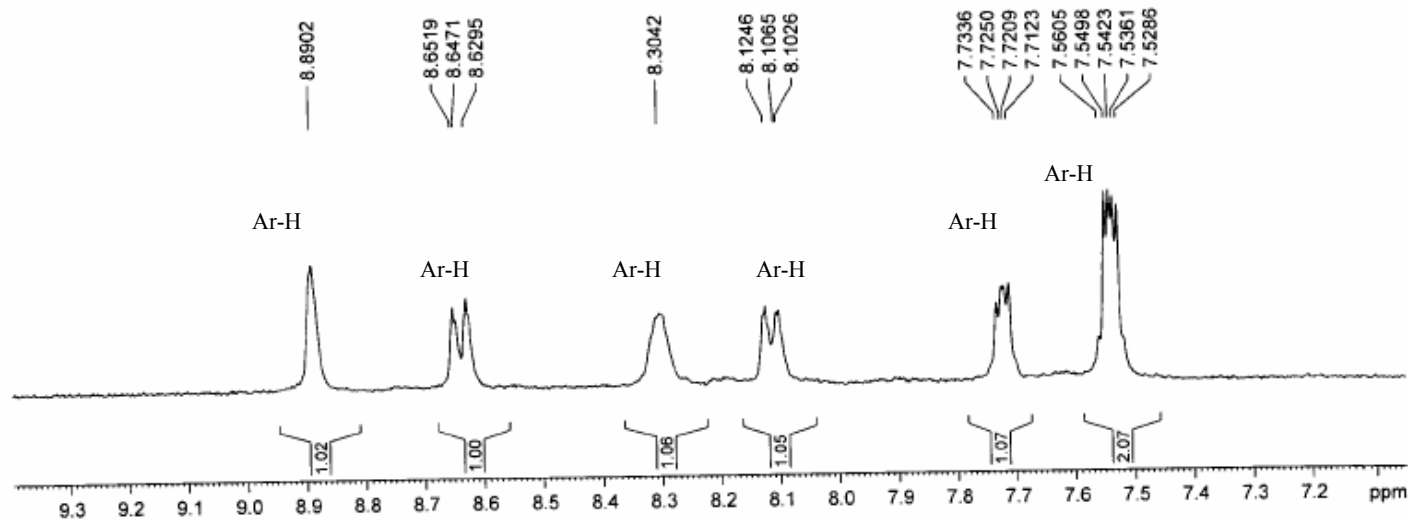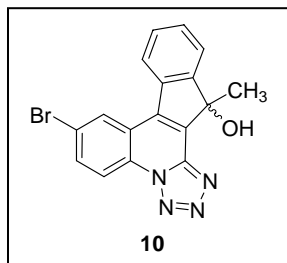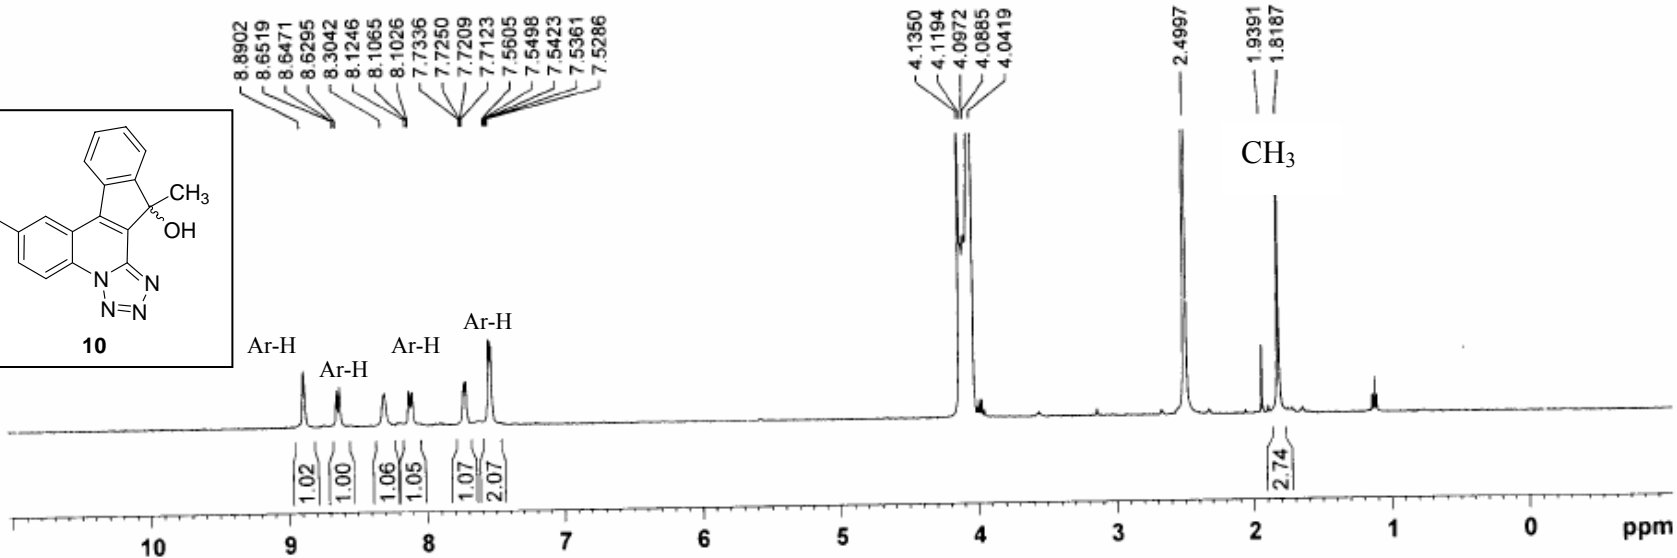

1009

Current Data Parameters  
 NAME CRES-75-103-103A2  
 EXPNO 1  
 PROCNO 1

F2 - Acquisition Parameters  
 Date\_ 20191130  
 Time 12.26  
 INSTRUM spect  
 PROBHD 5 mm DUL 13C-1  
 PULPROG zgpg30  
 TO 65536  
 SOLVENT DMISO  
 NS 400  
 DS 4  
 SWH 23688.014 Hz  
 FIDRES 0.355018 Hz  
 AQ 1.3954756 sec  
 RG 5193.6  
 DW 20.850 usec  
 DE 6.00 usec  
 TE 292.0 K  
 D1 2.01000000 sec  
 d11 0.03000000 sec  
 DELTA 1.00000000 sec  
 TD 6

===== CHANNEL f1 =====  
 NUC1 13C  
 P1 7.00 usec  
 PL1 -2.00 dB  
 SFO1 100.625000 MHz

===== CHANNEL f2 =====  
 CPROG2 zgpg30  
 NUC2 1H  
 PCPD2 80.00 usec  
 PL2 -1.00 dB  
 PL12 14.00 dB  
 PL13 14.00 dB  
 SFO2 400.1310000 MHz

F2 - Processing parameters  
 S 3274  
 SF 100.6120654 MHz  
 WDW EM  
 SSB 0  
 LB 0.60 Hz  
 GB 0  
 PC 0.20

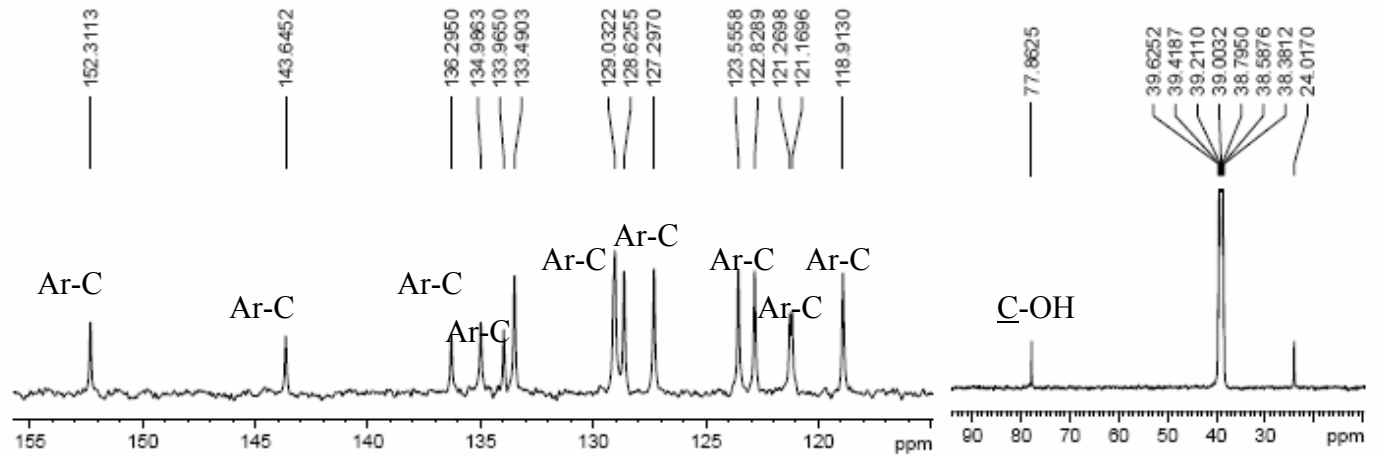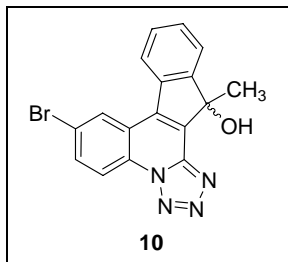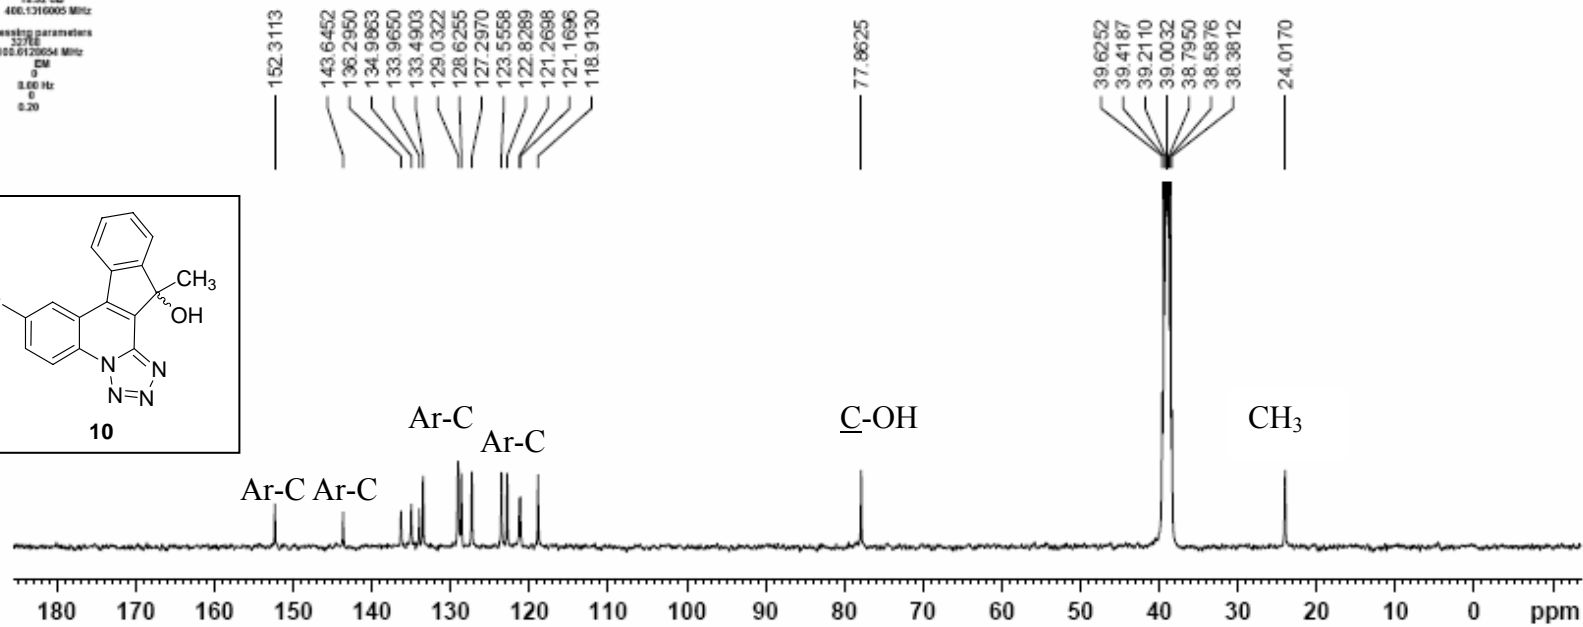



Sample Name: CR080-78-103-103A2 INDIA Acq. Time: 12:21 Acq. Date: Friday, March 12, 2010

+Q1: 3.521 to 3.621 min from Sample 6 (CR080-78-103-103A2) of CR080-MONI-12MAR10-B01.wiff (Turbo Spray), Subtracted < +Q1: 0.... Max. 1.3e5 cps.

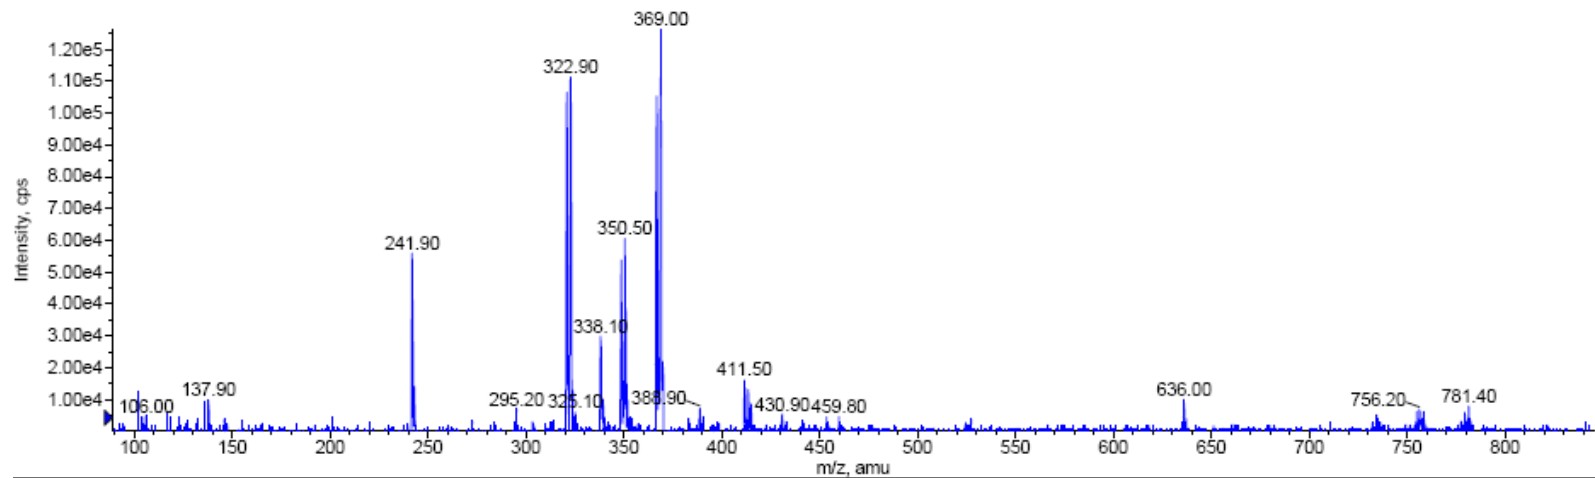

+Q1: 3.521 to 3.621 min from Sample 6 (CR080-78-103-103A2) of CR080-MONI-12MAR10-B01.wiff (Turbo Spray), Subtracted < +Q1: 0.... Max. 1.3e5 cps.

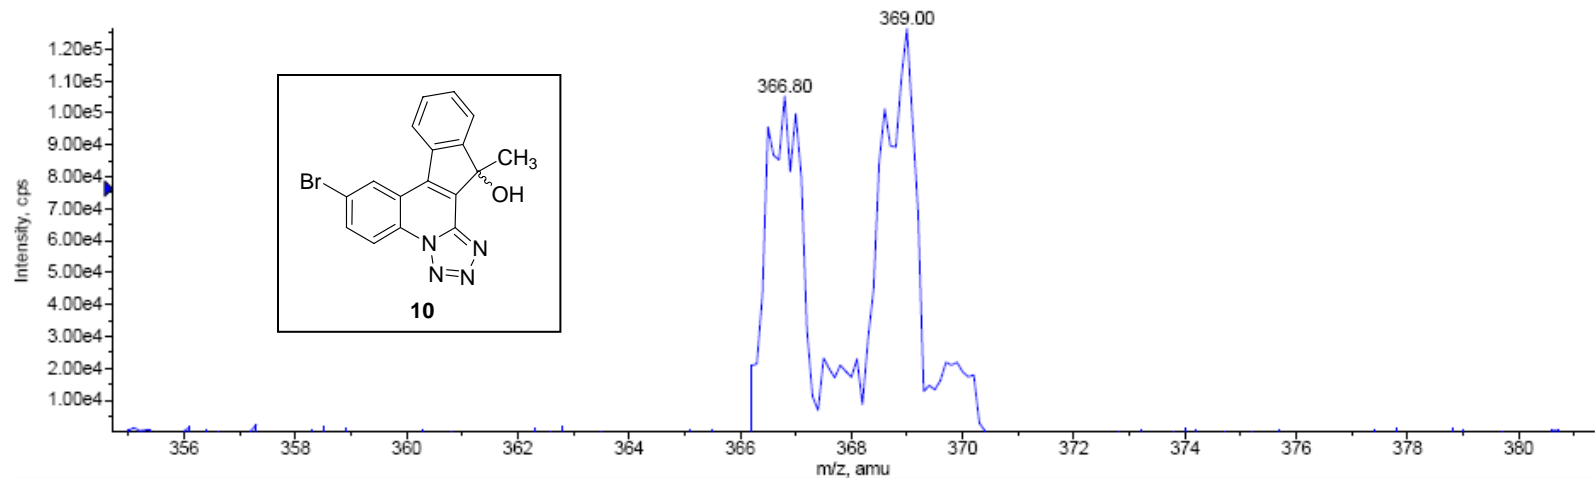

\*Sample Comment: [M+H] Expected 367 \*\*Analyzed By : \*\*Checked By :

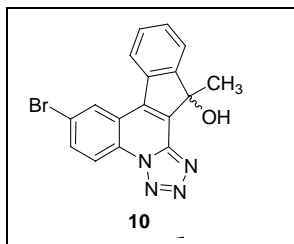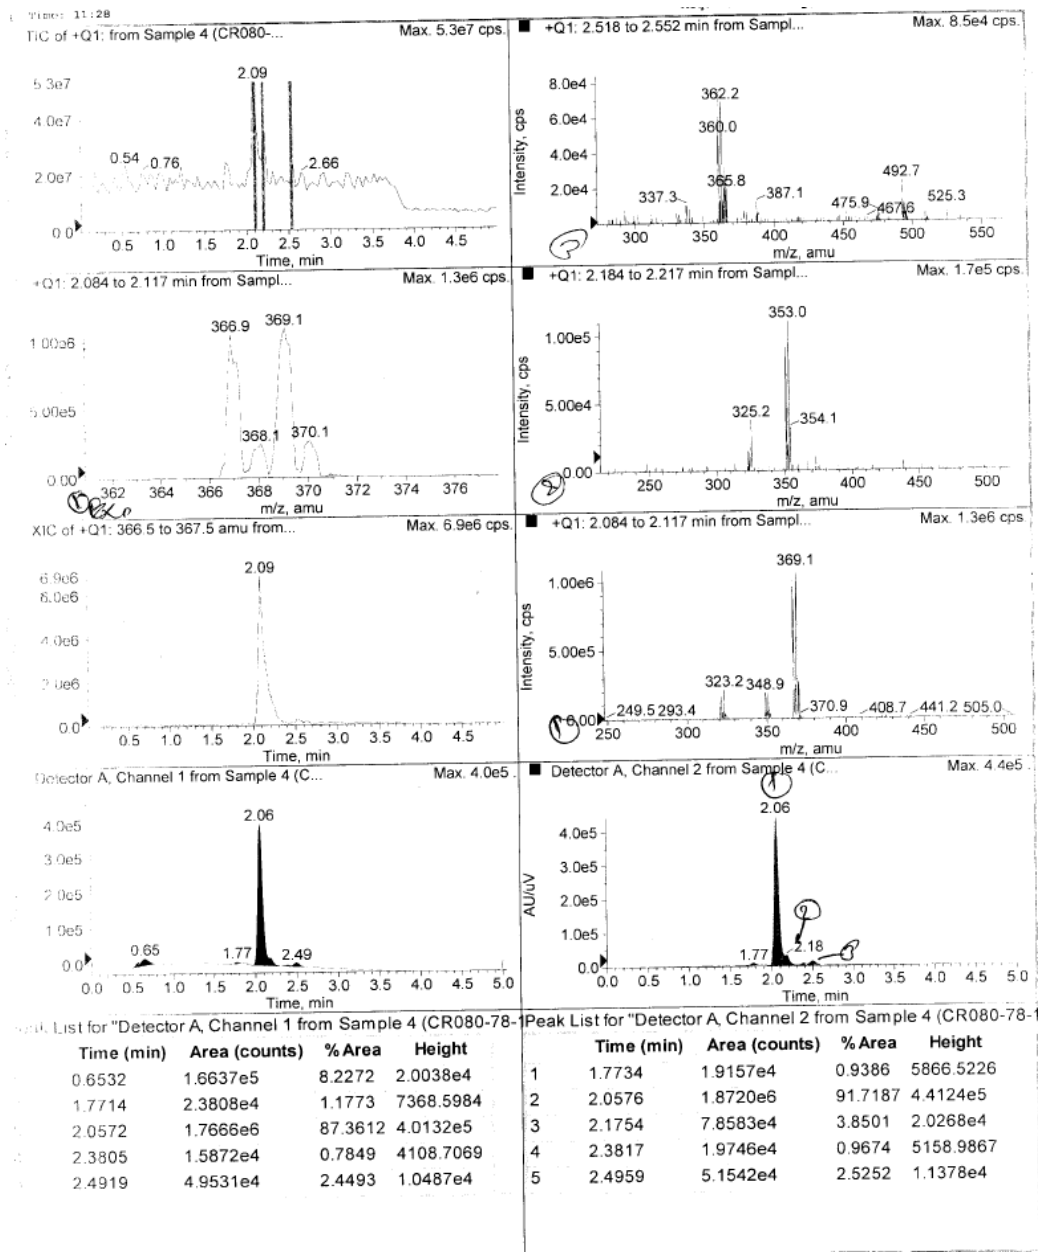

2 Revolution Monitoring in TFA

Analyzed By :

```

=====
Sample:CR080-78-103-103 A2                                     ->
Column: XTERRA RP(250X4.6)mm 5µ
Injection date   : Thu, 11. Feb. 2010                       Location   : Vial 24
Sample Name     : CR080-78-103-103 A2                       Inj. No.   : 1
Acq Operator    : BHUSHAN                                    Inj. Vol.  : 3 µl
Analysis Method : C:\CHEM32\2\METHODS\UPLC_GENARAL_GRAD_1.M
Last Changed    : Thu, 11. Feb. 2010,
Acq. Method     : C:\Chem32\2\DATA\FEB-10\110210E 2010-02-11 16-18-57\
                  UPLC_GENARAL_GRAD_1.M
Method ref      : DI/A0257/88
=====

```

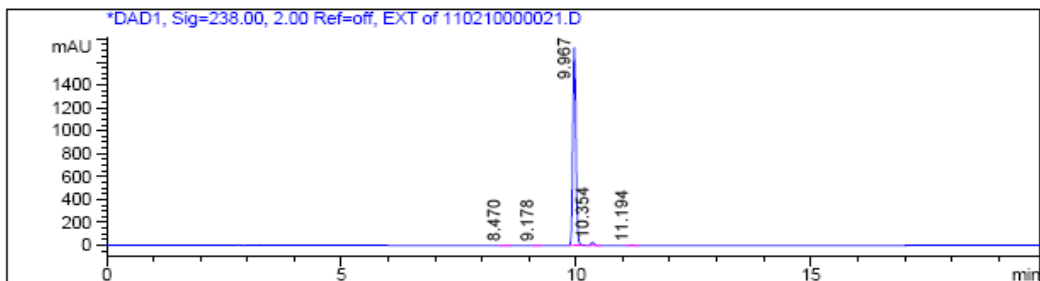

DAD1, Sig=238.00, 2.00 Ref=off, EXT

| Peak # | RT (Min) | Width (Min) | Area    | Area % |
|--------|----------|-------------|---------|--------|
| 1      | 8.470    | 0.075       | 12.580  | 0.154  |
| 2      | 9.178    | 0.075       | 7.401   | 0.091  |
| 3      | 9.967    | 0.077       | 7.971e3 | 97.810 |
| 4      | 10.354   | 0.080       | 129.704 | 1.592  |
| 5      | 11.194   | 0.112       | 28.745  | 0.353  |

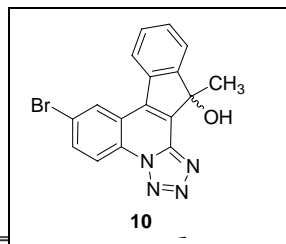

\*\*\* End of Report\*\*\*

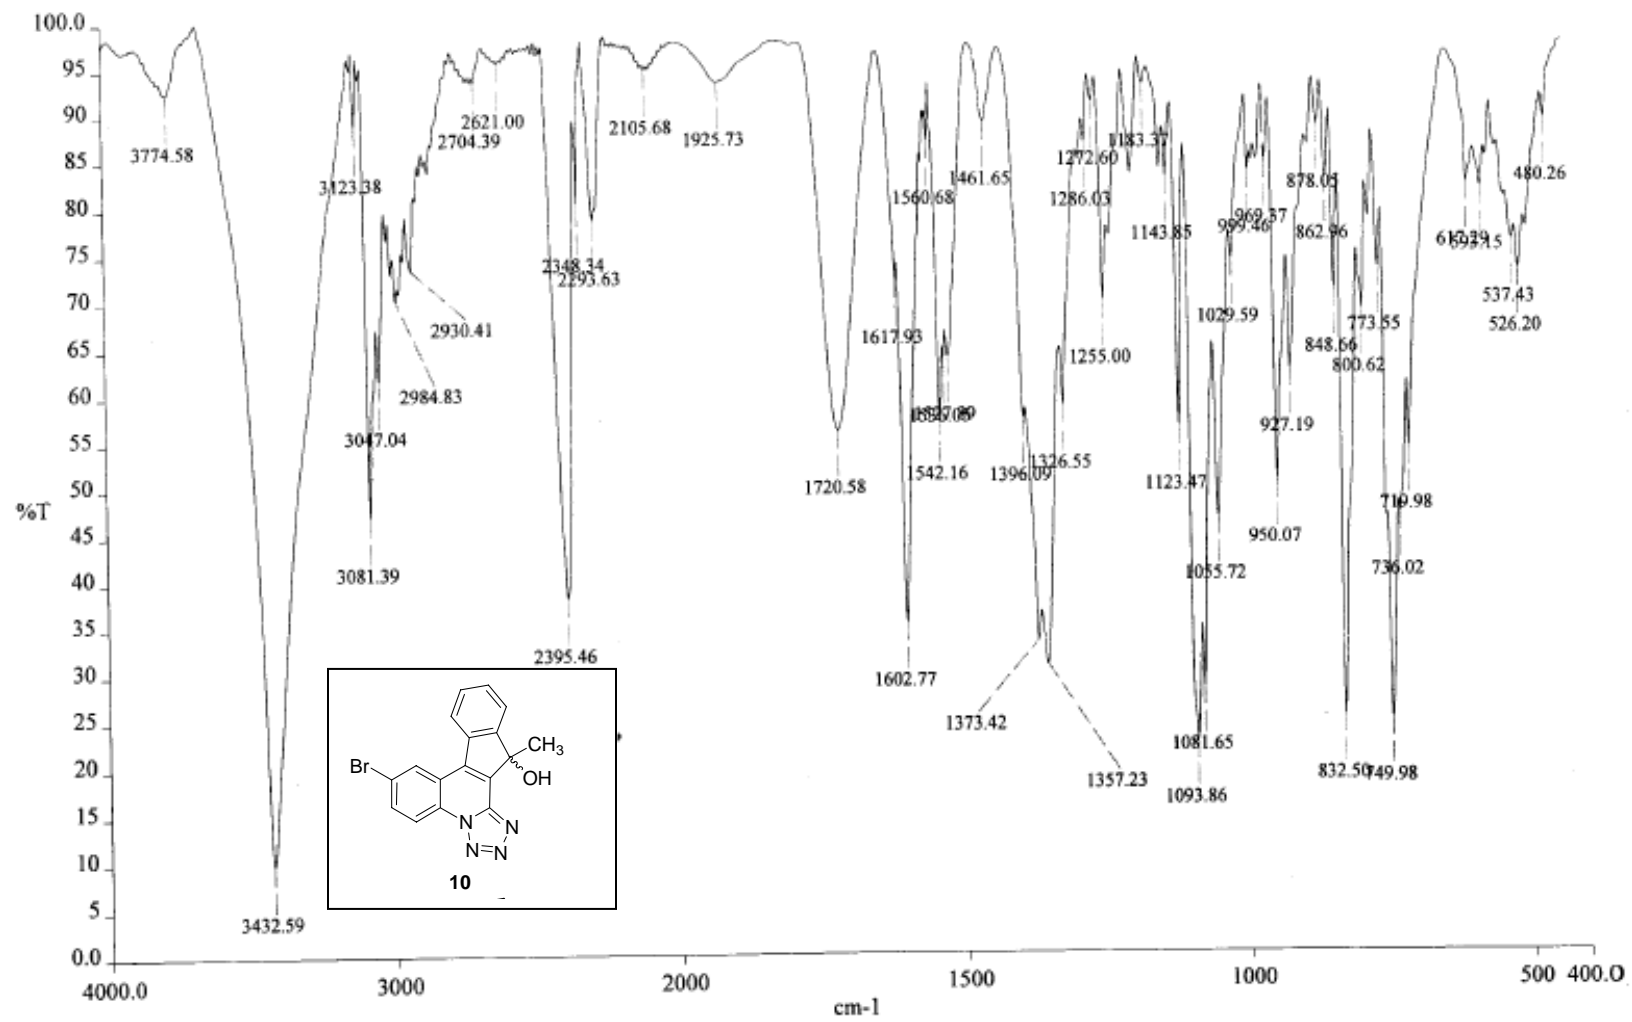

NAME CR080-97-51-51A  
 EXPNO 1  
 PROCNO 1  
 Date\_ 20091202  
 Time 10.20  
 INSTRUM spect  
 PROBHD 5 mm DJL 13C-1  
 PULPROG zg30  
 TD 32768  
 SOLVENT CDC13  
 NS 4  
 DS 0  
 SWH 8278.146 Hz  
 FIDRES 0.252629 Hz  
 AQ 1.9792372 sec  
 RG 812.7  
 DW 60.400 usec  
 DE 6.00 usec  
 TE 292.9 K  
 D1 3.00000000 sec  
 TD0 1

----- CHANNEL f1 -----  
 NUC1 1H  
 P1 12.50 usec  
 PL1 -1.00 dB  
 SFO1 400.1324710 MHz  
 SI 16384  
 SF 400.1300133 MHz  
 WDW EM  
 SSB 0  
 LB 0.30 Hz  
 GB 0  
 PC 0.50

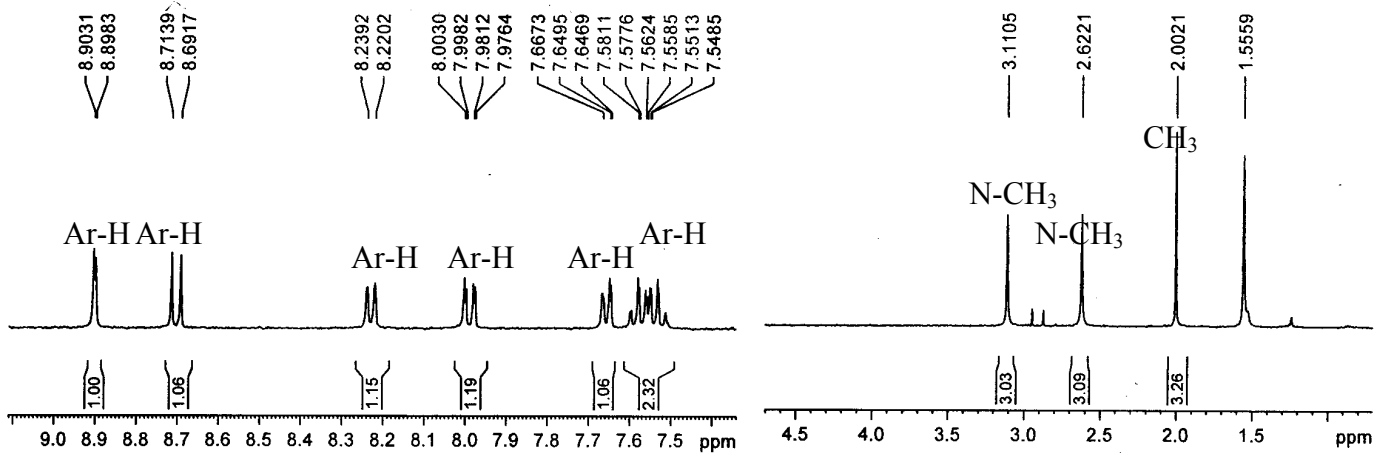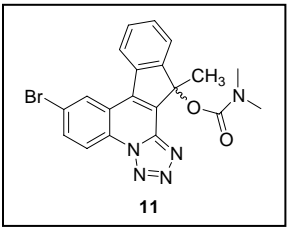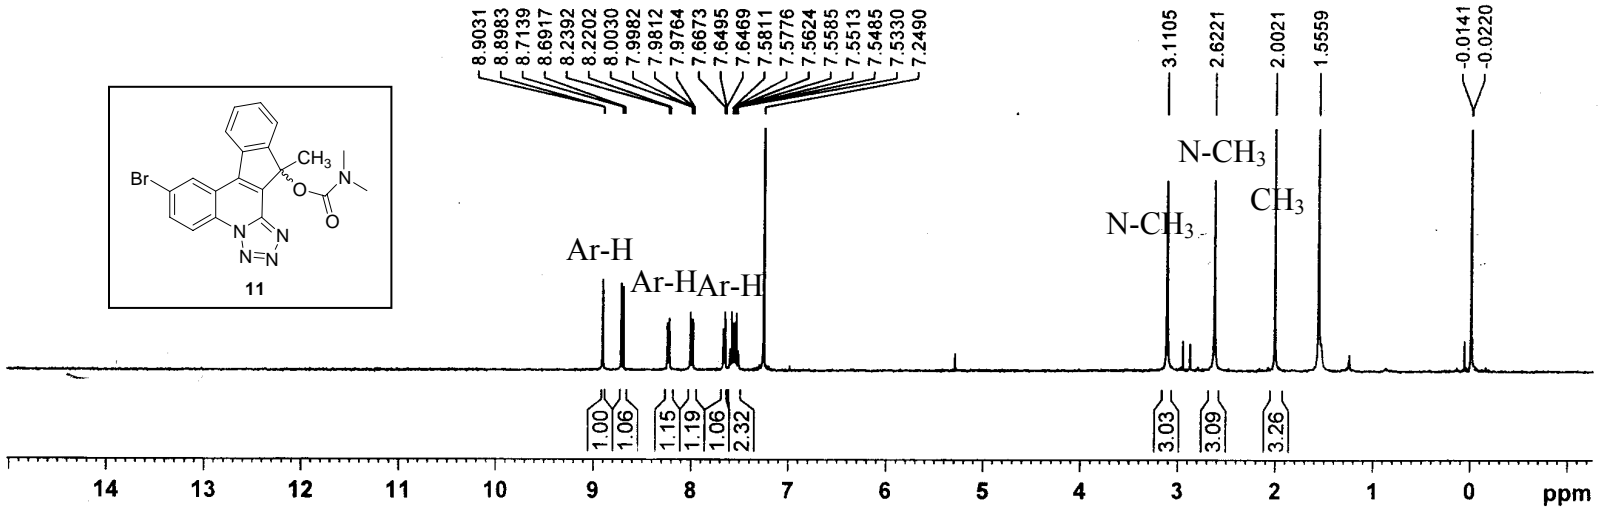

Current Data Parameters  
 NAME: CREED-01-01A  
 EXPNO: 1  
 PROCNO: 1

F2 - Acquisition Parameters  
 Date\_: 20100130  
 Time: 10.32  
 INSTRUM: spect  
 PROBHD: 5 mm QNP 13C-1  
 PULPROG: zgpg30  
 TD: 65536  
 SOLVENT: CDCl3  
 NS: 391  
 DS: 4  
 SWH: 23888.014 Hz  
 FIDRES: 0.353910 Hz  
 AQ: 1.3254756 sec  
 RG: 3648.1  
 DW: 20.850 usec  
 DE: 6.00 usec  
 TE: 300.2 K  
 D1: 2.8333333 sec  
 d11: 0.0333333 sec  
 DELTA: 1.5000000 sec  
 TDK:

==== CHANNEL f1 =====  
 NUC1: 13C  
 P1: 7.00 usec  
 PL1: -2.30 dB  
 SFO1: 100.620000 MHz

==== CHANNEL f2 =====  
 CDPORG2: waltz16  
 NUC2: 1H  
 PCPD2: -92.00 usec  
 PL2: -1.00 dB  
 PL12: 14.02 dB  
 PL13: 18.02 dB  
 SFO2: 400.1310000 MHz

F2 - Processing parameters  
 SF: 377.05  
 SF2: 100.6127167 MHz  
 WDW: EM  
 SSB: 0  
 LB: 0.00 Hz  
 GB: 0  
 PC: 0.20

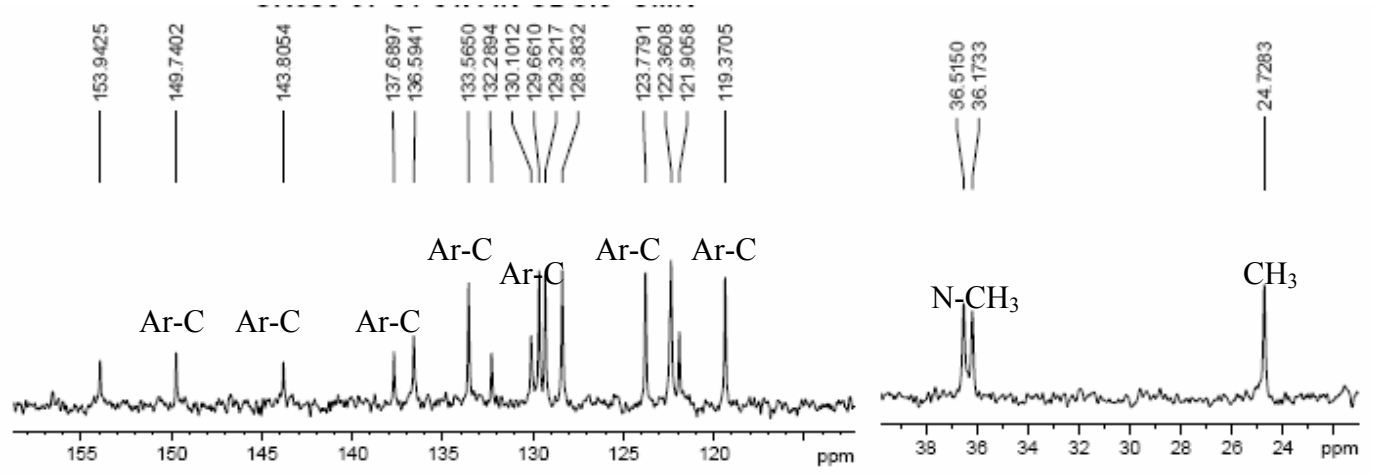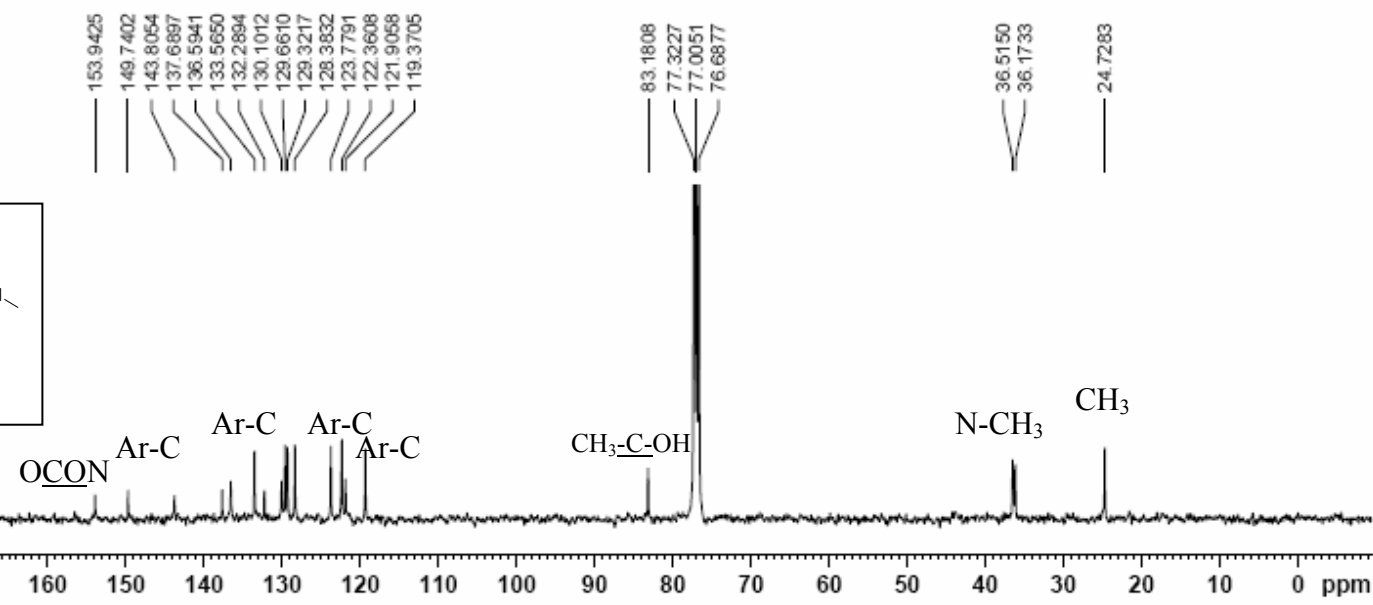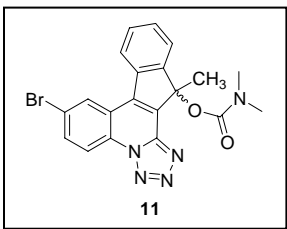

Sample Name: CR080-97-51-51A

INDIA  
Acq. Time: 11:21

Acq. Date: Wednesday, December 02, 2009

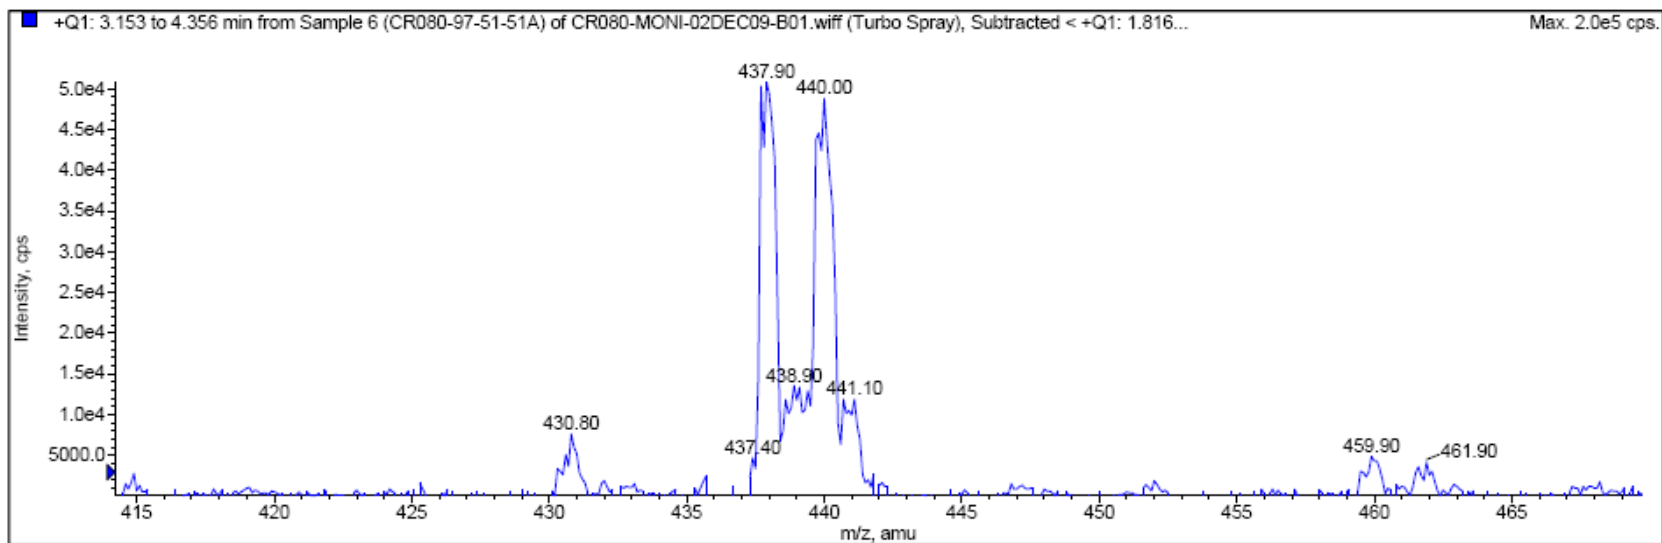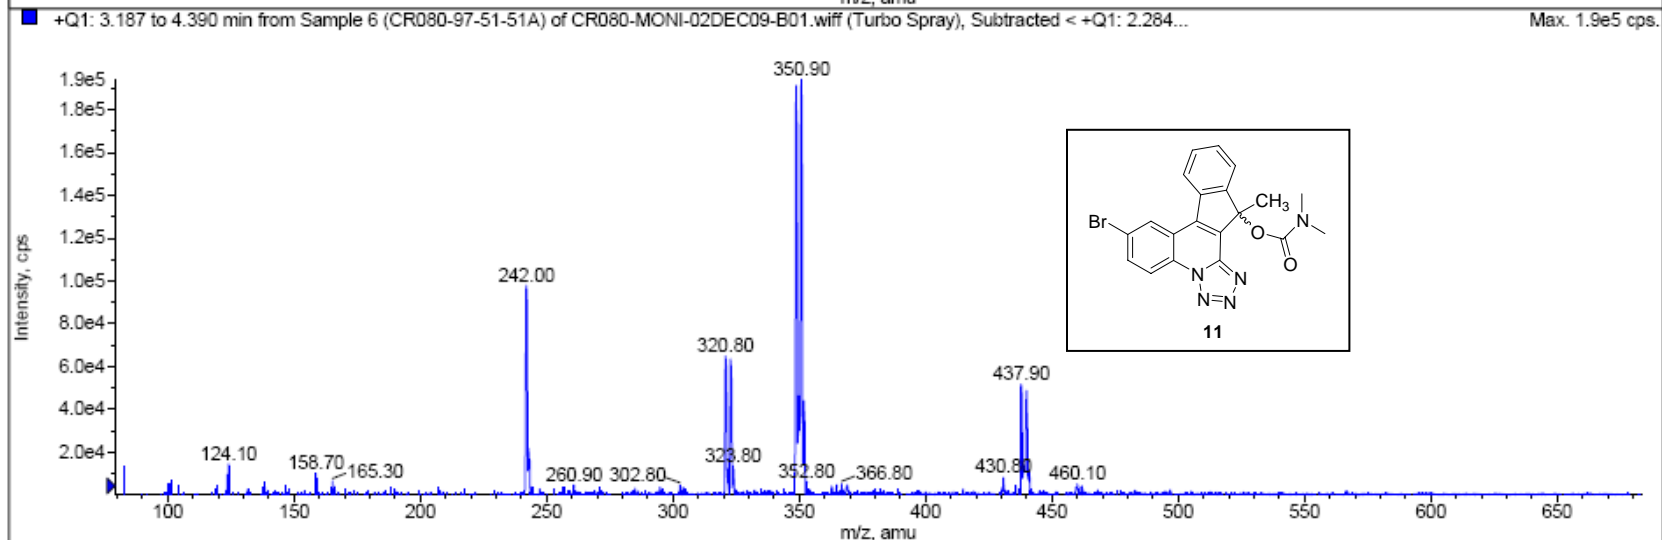

\*Sample Comment: [M+H] 438

Expected

\*\*Analyzed By :

\*\*Checked By :

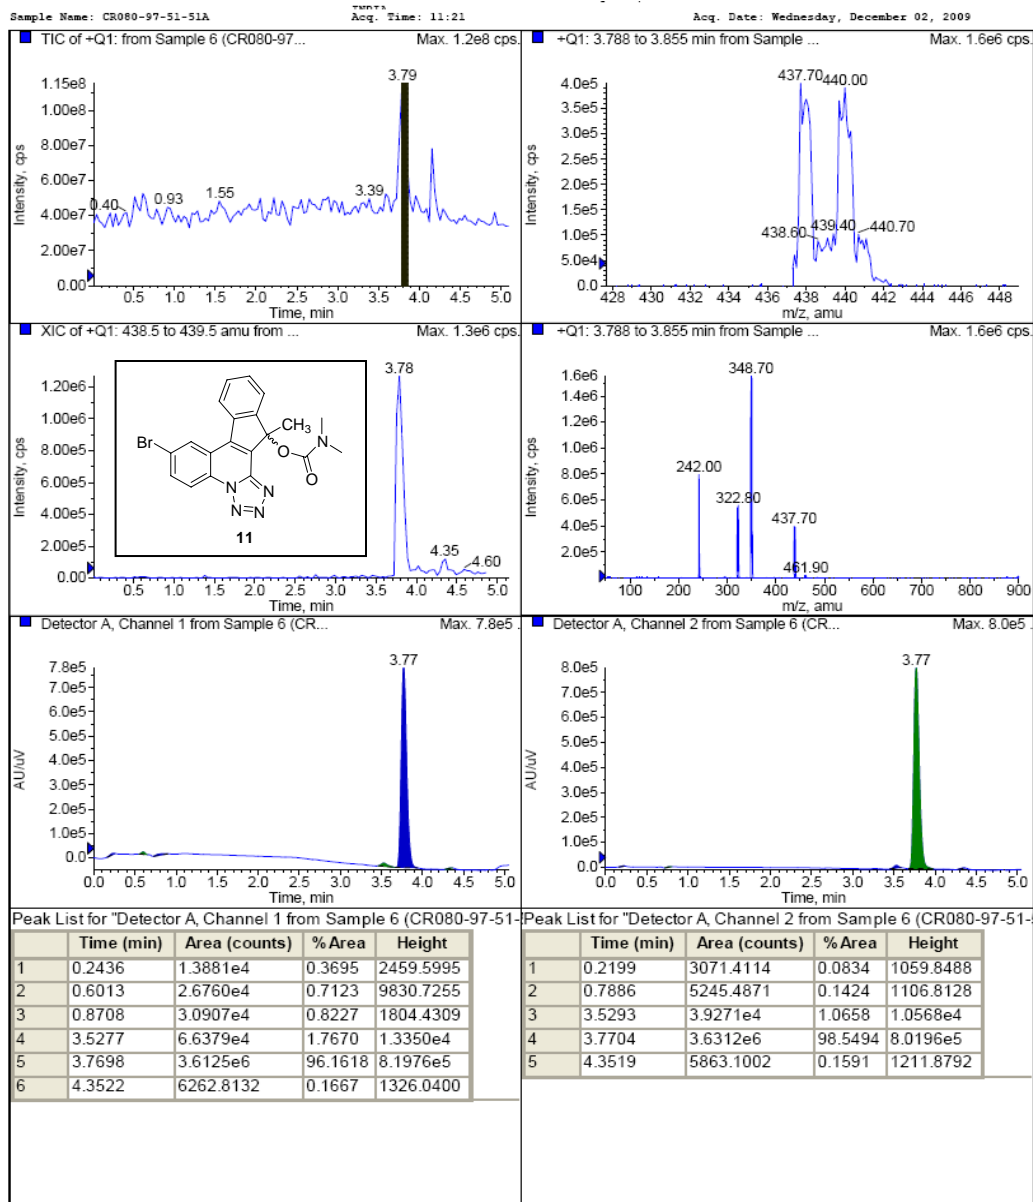



Sample Name : CR080-97-51-51A  
 Sample ID : CR080-97-51-51A  
 Column : Gemini C-18 (150 x 4.6 mm)  
 Vial # : 57  
 Inj. Volume : 4 uL  
 Tray # : 1  
 Acquired by : AVINASH

Data File Name : 11-02-10\_CR080-97-51-51A\_04.lcd  
 Method File Name : GENERAL\_B2.lcm  
 Batch File Name : 130210.lcb  
 Data Acquired : 2/13/2010 3:36:00 PM  
 Data Processed : 2/13/2010 4:01:03 PM  
 Ref.No.: DI/A0257/90

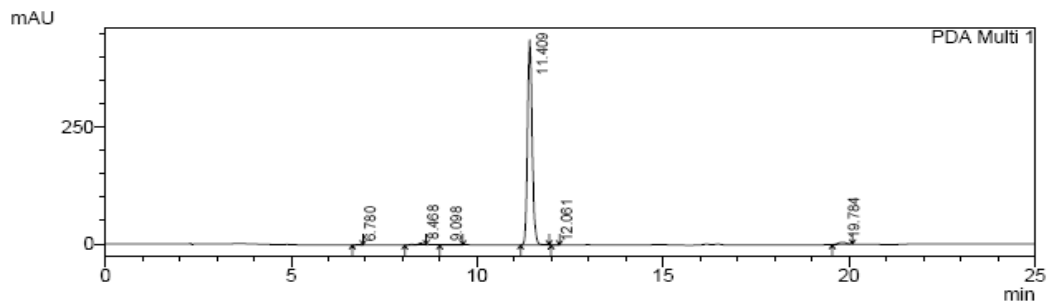

1 PDA Multi 1/242nm 4nm

PeakTable

| Peak# | Ret. Time | Area    | Area % | Height |
|-------|-----------|---------|--------|--------|
| 1     | 6.78      | 3076    | 0.08   | 490    |
| 2     | 8.47      | 38385   | 0.98   | 3979   |
| 3     | 9.10      | 8800    | 0.22   | 508    |
| 4     | 11.41     | 3811649 | 97.09  | 437964 |
| 5     | 12.06     | 785     | 0.02   | 121    |
| 6     | 19.78     | 63090   | 1.61   | 4027   |
| Total |           | 3925785 | 100.00 | 447089 |

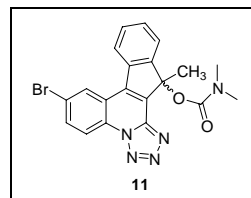

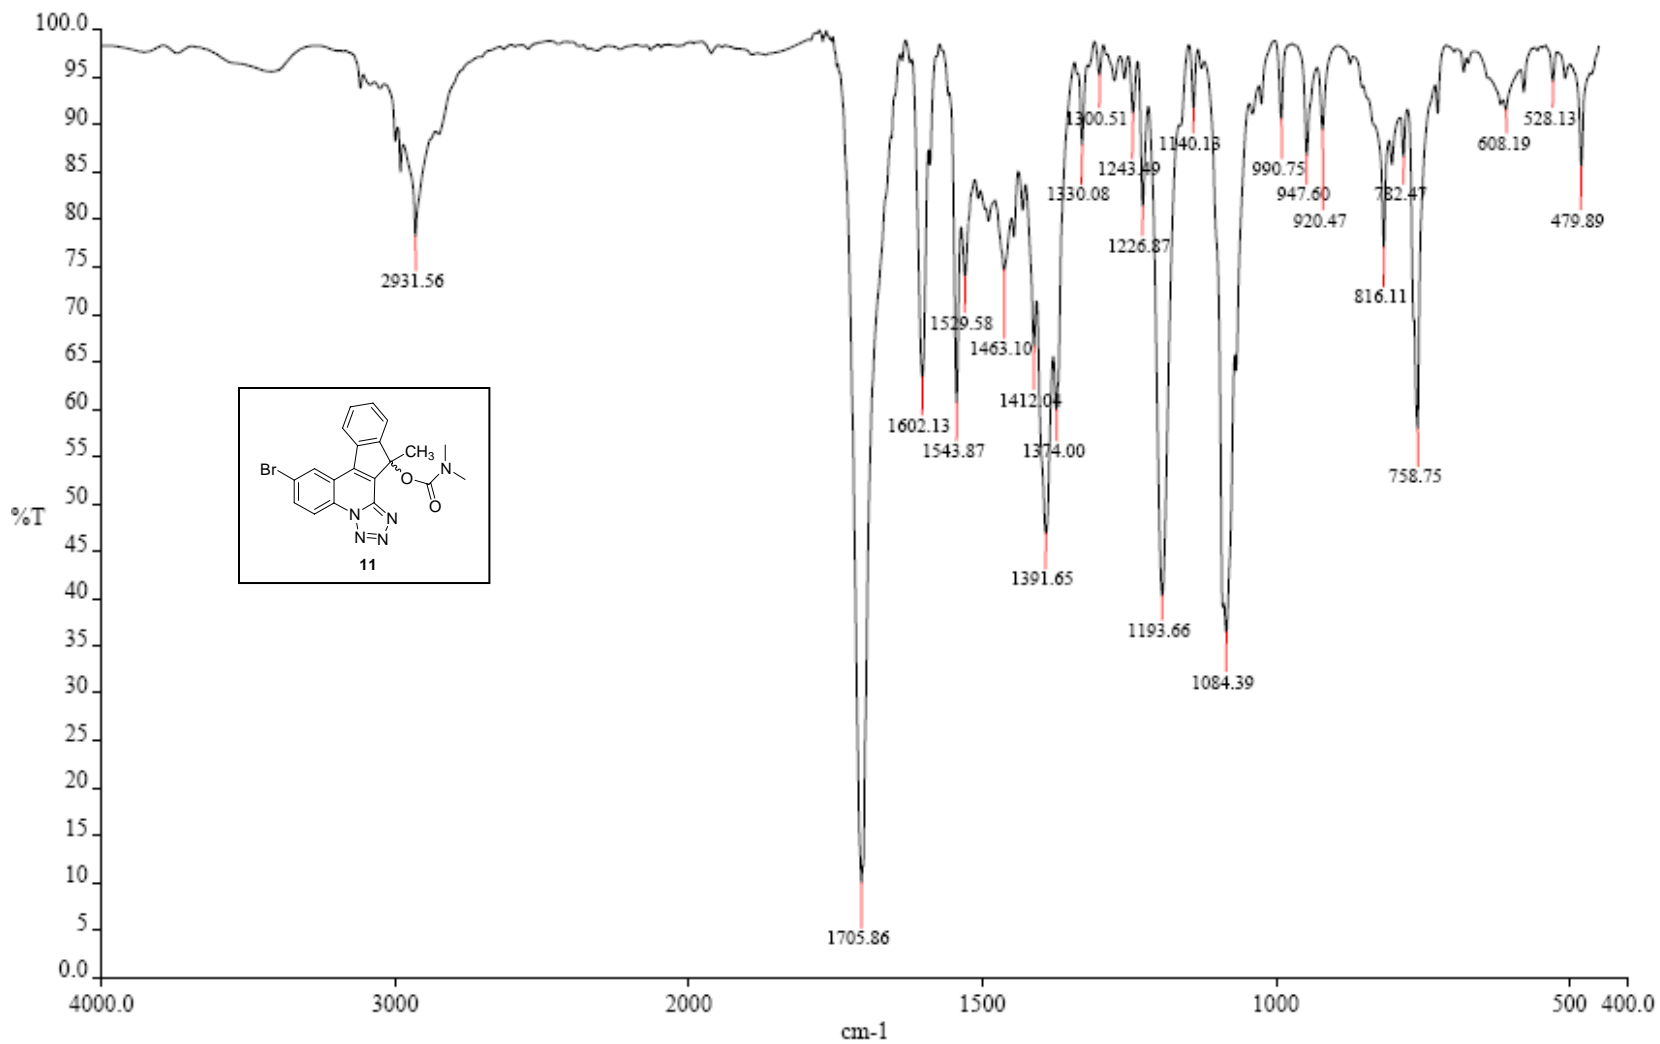

Spectrum Name: CR080-97-51-51A.sp

Analyst: GANESH

Accumulations: 16

Time: 10:04:53 AM

Description: CR080-97-51-51A IN KBr

Resolution: 4.00 cm-1

Date: 2/3/2010

Current Data Parameters  
 NAME: CROSS 97 91 91A  
 EXPNO: 1  
 PROCNO: 1

F2 - Acquisition Parameters  
 Date\_: 20100125  
 Time: 10.08  
 INSTRUM: spect  
 PROBHD: 5 mm DUL 13C-1  
 PULPROG: zg30  
 TD: 32768  
 SOLVENT: CDCl3  
 NS: 8  
 DS: 0  
 SWH: 8278.148 Hz  
 FIDRES: 0.26289 Hz  
 AQ: 1.8792872 sec  
 RG: 293.2  
 DW: 60.400 usec  
 DE: 0.00 usec  
 TE: 292.1 K  
 D1: 3.0000000 sec  
 TD0: 1

===== CHANNEL f1 =====  
 NUC1: 1H  
 P1: 12.50 usec  
 PL1: -1.00 dB  
 SFO1: 400.1324710 MHz

F3 - Processing parameters  
 SI: 16384  
 SF: 400.1300128 MHz  
 WDW: EM  
 SSB: 0  
 LB: 0.30 Hz  
 GB: 0  
 PC: 0.50

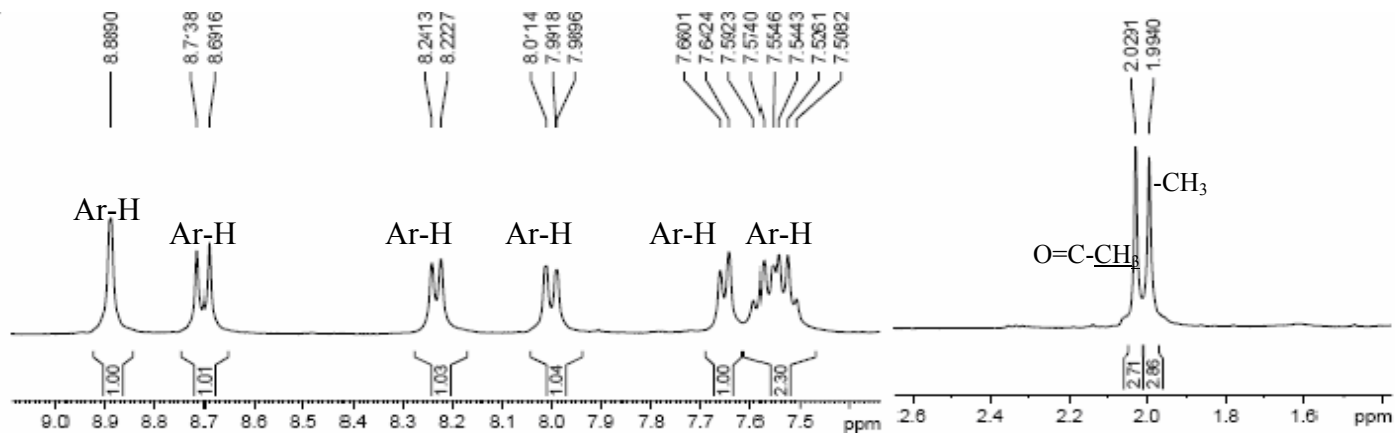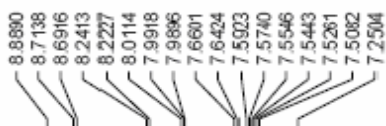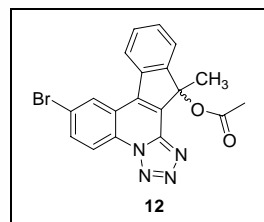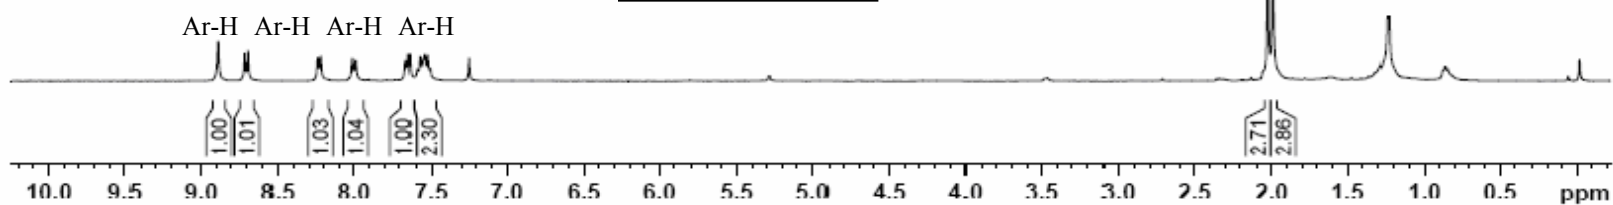

CR080-97-81-81A IN CDCl3 -CMR

7

Current Data Parameters  
 NAME CR080-97-81-81A  
 EXPNO 1  
 PROCNO 1  
 F2 - Acquisition Parameters  
 Date\_ 20100128  
 Time 10.18  
 INSTRUM spect  
 PROBHD 5 mm DUL 13C-1  
 PULPROG zgpg30  
 TD 65536  
 SOLVENT CDCl3  
 NS 456  
 DS 4  
 SWH 23980.814 Hz  
 FIDRES 0.365918 Hz  
 AQ 1.3684756 sec  
 RG 2580.3  
 DW 20.850 usec  
 DE 6.00 usec  
 TE 292.4 K  
 D1 2.00000000 sec  
 d11 0.03000000 sec  
 DELTA 1.89999998 sec  
 TDO 1

===== CHANNEL f1 =====  
 NUC1 13C  
 P1 7.80 usec  
 PL1 -2.00 dB  
 SFO1 100.622298 MHz  
 ===== CHANNEL f2 =====  
 CPDPRG2 waltz16  
 NUC2 1H  
 PCPD2 100.00 usec  
 PL2 -1.00 dB  
 PL12 14.92 dB  
 PL13 18.92 dB  
 SFO2 400.1316005 MHz  
 F2 - Processing parameters  
 SI 32768  
 SF 100.6127735 MHz  
 EQ  
 SSB 0  
 LB 8.00 Hz  
 GB 0  
 PC 0.20

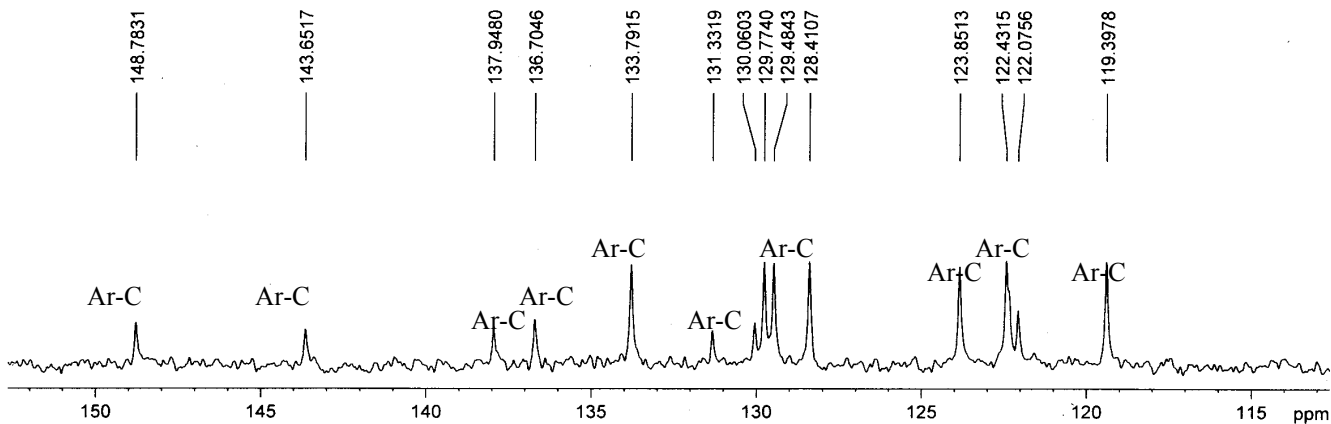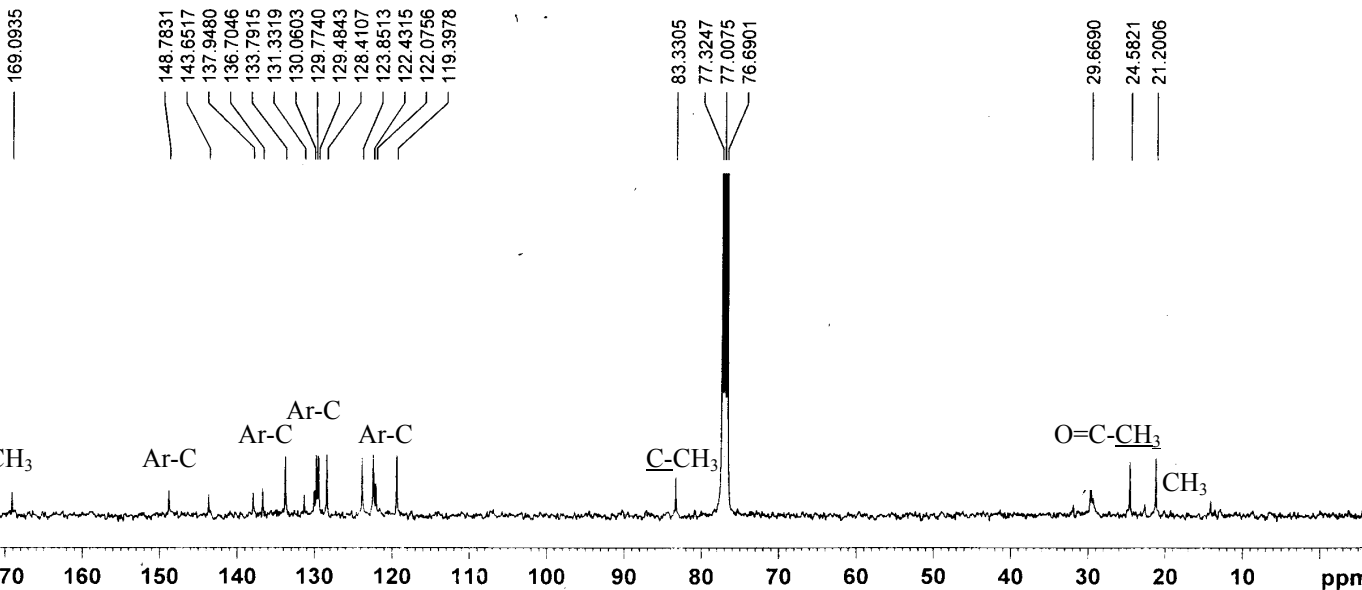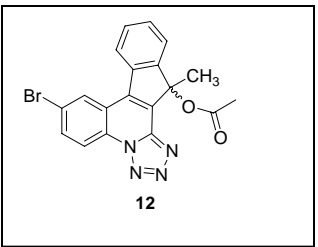

Sample Name: CR080-97-81-81A

Acq. Time: 10:36

Acq. Date: Monday, January 25, 2010

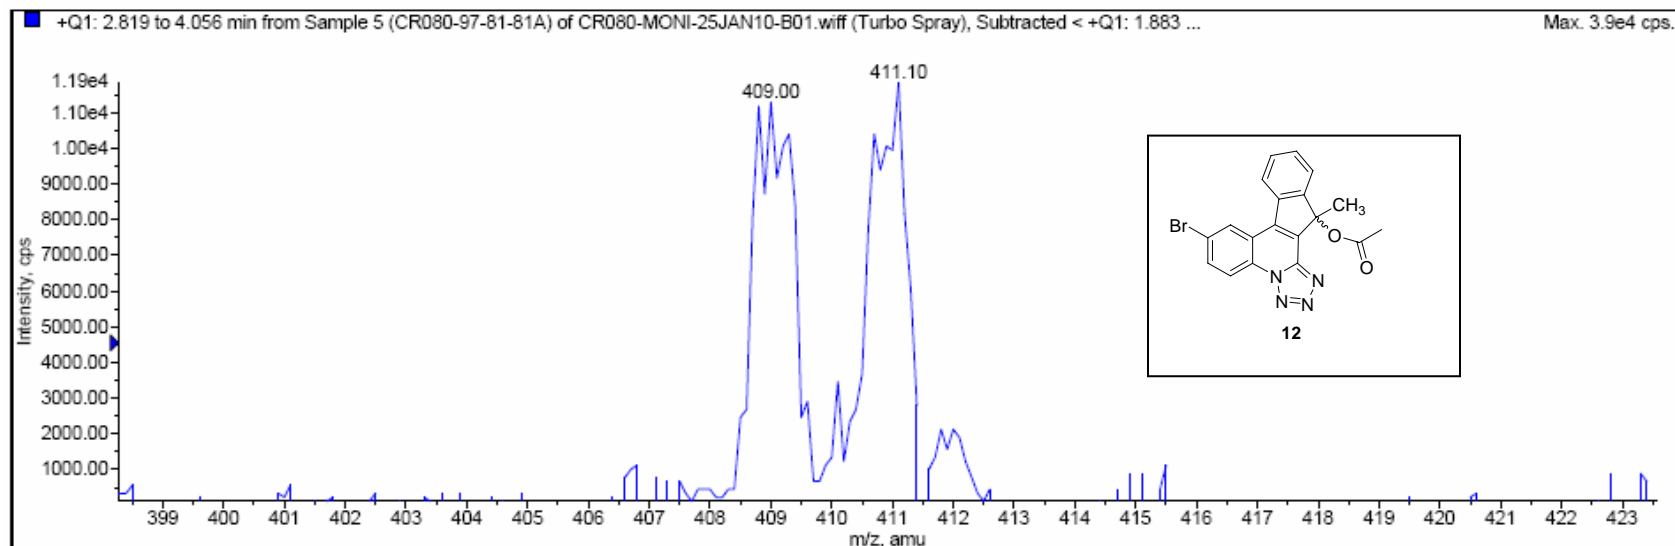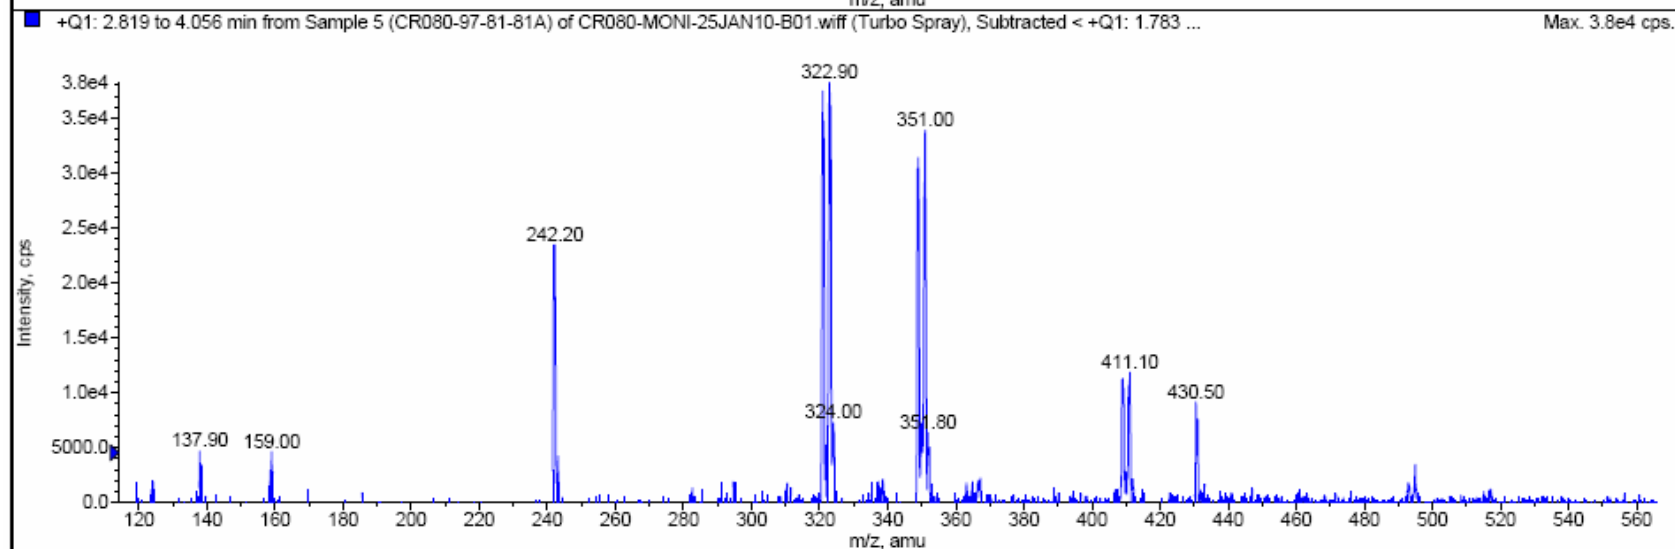

\*Sample Comment: [M+H] 409

Expected

\*\*Analyzed By :

\*\*Checked By :

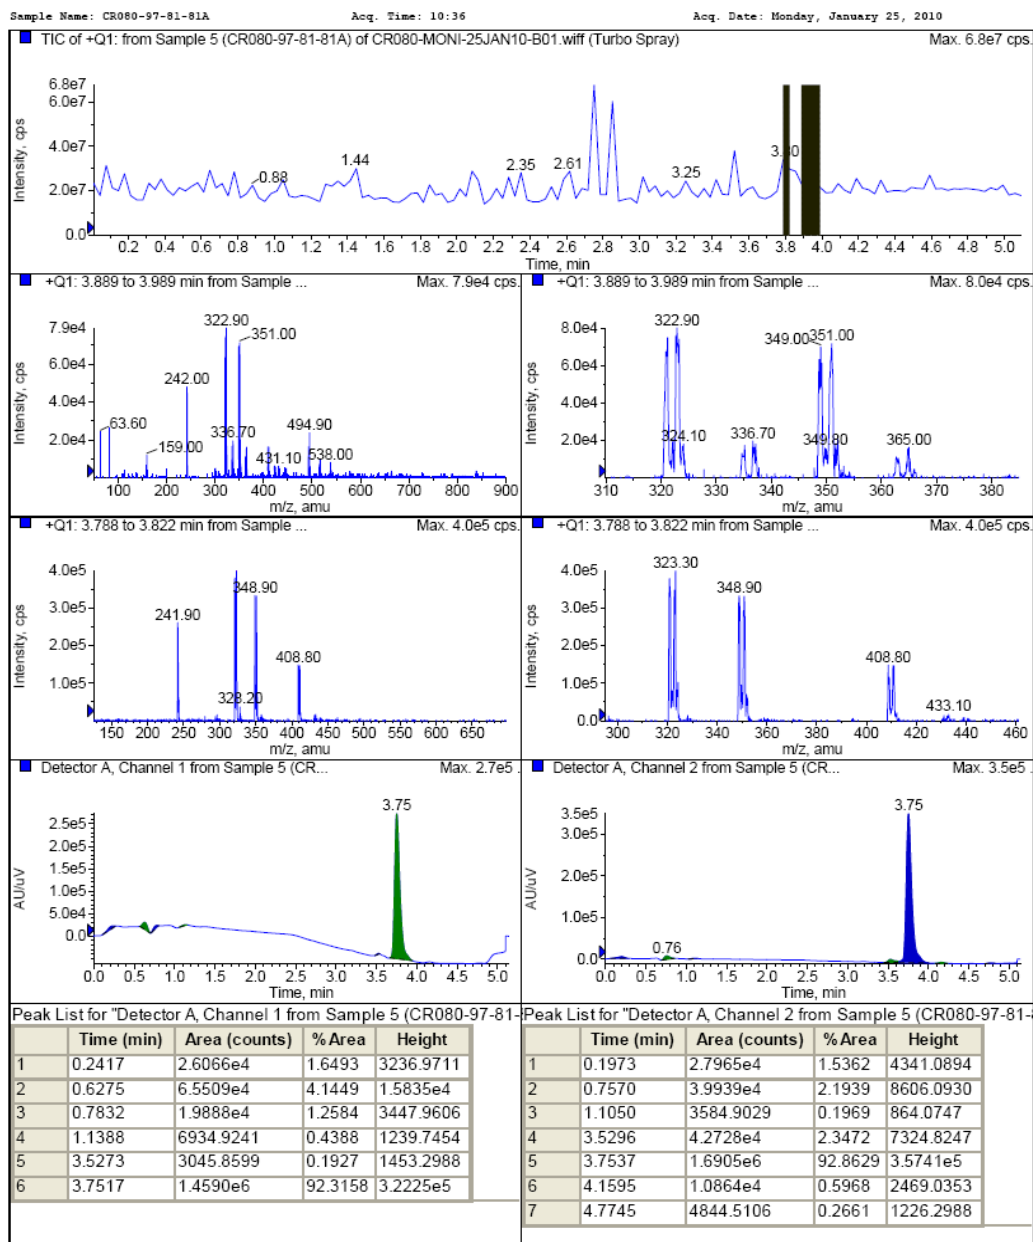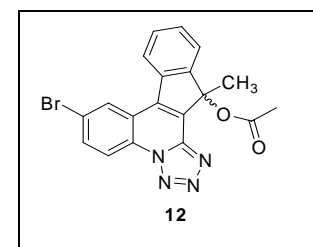

Sample Name : CR080-97-81-81A  
 Sample ID : CR080-97-81-81A  
 Column : Gemini C-18 (150 x 4.6 mm)  
 Vial # : 60  
 Inj. Volume : 4 uL  
 Tray # : 1  
 Acquired by : AVINASH

Data File Name : 11-02-10\_CR080-97-81-81A\_04.lcd  
 Method File Name : GENERAL\_B2.lcm  
 Batch File Name : 130210.lcb  
 Data Acquired : 2/13/2010 6:11:59 PM  
 Data Processed : 2/13/2010 6:37:01 PM  
 Ref.No.: DI/A0257/91

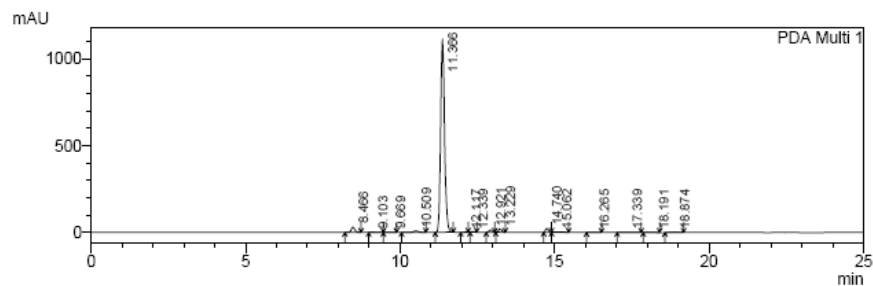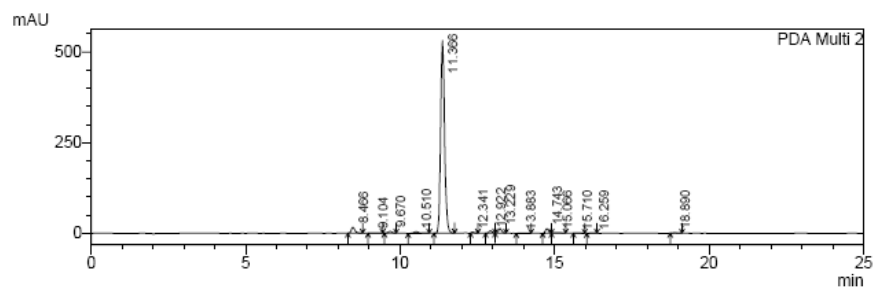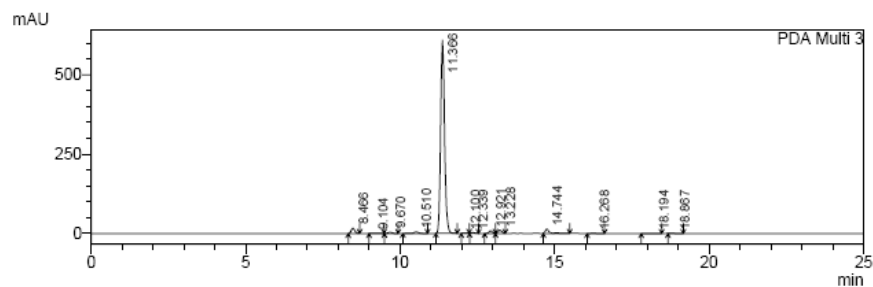

- 1 PDA Multi 1/242nm 4nm
- 2 PDA Multi 2/220nm 4nm
- 3 PDA Multi 3/260nm 4nm

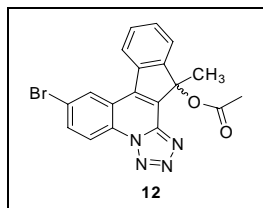

PDA Ch1 242nm 4nm

| Peak# | Ret. Time | Area     | Area % | Height  |
|-------|-----------|----------|--------|---------|
| 1     | 8.47      | 239135   | 2.24   | 30905   |
| 2     | 9.10      | 15125    | 0.14   | 1668    |
| 3     | 9.67      | 19700    | 0.18   | 2150    |
| 4     | 10.51     | 96383    | 0.90   | 8833    |
| 5     | 11.37     | 9795432  | 91.84  | 1112000 |
| 6     | 12.12     | 7310     | 0.07   | 977     |
| 7     | 12.34     | 23531    | 0.22   | 3559    |
| 8     | 12.92     | 90624    | 0.85   | 13432   |
| 9     | 13.23     | 137545   | 1.29   | 19655   |
| 10    | 14.74     | 145995   | 1.37   | 21516   |
| 11    | 15.06     | 43265    | 0.41   | 2331    |
| 12    | 16.27     | 11761    | 0.11   | 1019    |
| 13    | 17.34     | 11675    | 0.11   | 579     |
| 14    | 18.19     | 9189     | 0.09   | 591     |
| 15    | 18.87     | 19111    | 0.18   | 1485    |
| Total |           | 10665781 | 100.00 | 1220699 |

PeakTable

PDA Ch2 220nm 4nm

| Peak# | Ret. Time | Area    | Area % | Height |
|-------|-----------|---------|--------|--------|
| 1     | 8.47      | 129262  | 2.46   | 16333  |
| 2     | 9.10      | 13426   | 0.26   | 939    |
| 3     | 9.67      | 44532   | 0.85   | 5108   |
| 4     | 10.51     | 54266   | 1.03   | 4564   |
| 5     | 11.37     | 4705517 | 89.72  | 530597 |
| 6     | 12.34     | 16268   | 0.31   | 2497   |
| 7     | 12.92     | 42297   | 0.81   | 6163   |
| 8     | 13.23     | 91486   | 1.74   | 12665  |
| 9     | 13.88     | 11086   | 0.21   | 1022   |
| 10    | 14.74     | 88703   | 1.69   | 12578  |
| 11    | 15.07     | 22844   | 0.44   | 1507   |
| 12    | 15.71     | 6730    | 0.13   | 677    |
| 13    | 16.26     | 8042    | 0.15   | 760    |
| 14    | 18.89     | 10272   | 0.20   | 902    |
| Total |           | 5244731 | 100.00 | 596314 |

PeakTable

PDA Ch3 260nm 4nm

| Peak# | Ret. Time | Area    | Area % | Height |
|-------|-----------|---------|--------|--------|
| 1     | 8.47      | 127488  | 2.15   | 16586  |
| 2     | 9.10      | 9426    | 0.16   | 934    |
| 3     | 9.67      | 33843   | 0.57   | 3851   |
| 4     | 10.51     | 51663   | 0.87   | 4856   |
| 5     | 11.37     | 5392938 | 91.03  | 608664 |
| 6     | 12.10     | 6931    | 0.12   | 853    |
| 7     | 12.34     | 17416   | 0.29   | 2283   |
| 8     | 12.92     | 58850   | 0.99   | 8083   |
| 9     | 13.23     | 80398   | 1.36   | 10680  |
| 10    | 14.74     | 123673  | 2.09   | 13895  |
| 11    | 16.27     | 7930    | 0.13   | 576    |
| 12    | 18.19     | 5575    | 0.09   | 323    |
| 13    | 18.87     | 8118    | 0.14   | 695    |
| Total |           | 5924251 | 100.00 | 672278 |

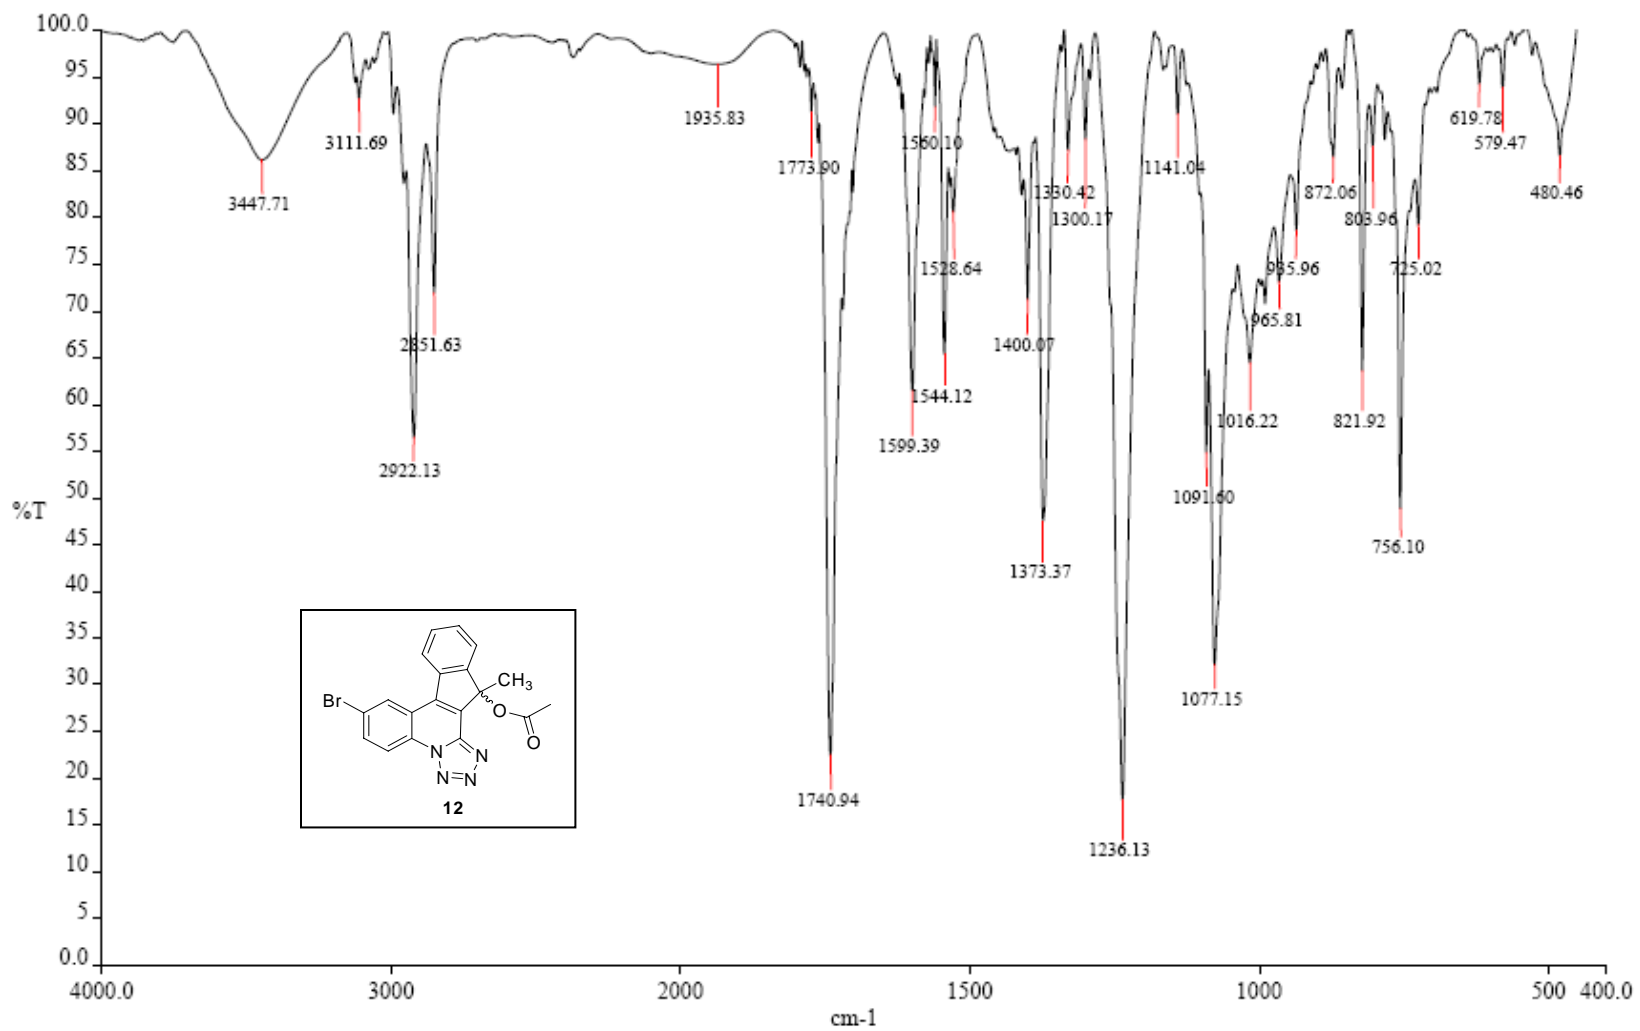

Spectrum Name: CR080-97-81-81A.sp

Analyst: GANESH

Accumulations: 16

Time: 10:45:32 AM

Description: CR080-97-81-81A IN KBr

Resolution: 4.00 cm<sup>-1</sup>

Date: 1/25/2010



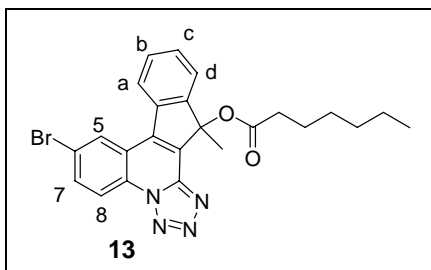

9.182  
9.178

8.868  
8.850

8.690  
8.688  
8.674

8.381  
8.377  
8.364  
8.360

8.193  
8.176

7.868  
7.866  
7.864  
7.854  
7.851  
7.755  
7.753  
7.740  
7.737  
7.726  
7.722  
7.721  
7.718  
7.706  
7.704  
7.691  
7.689

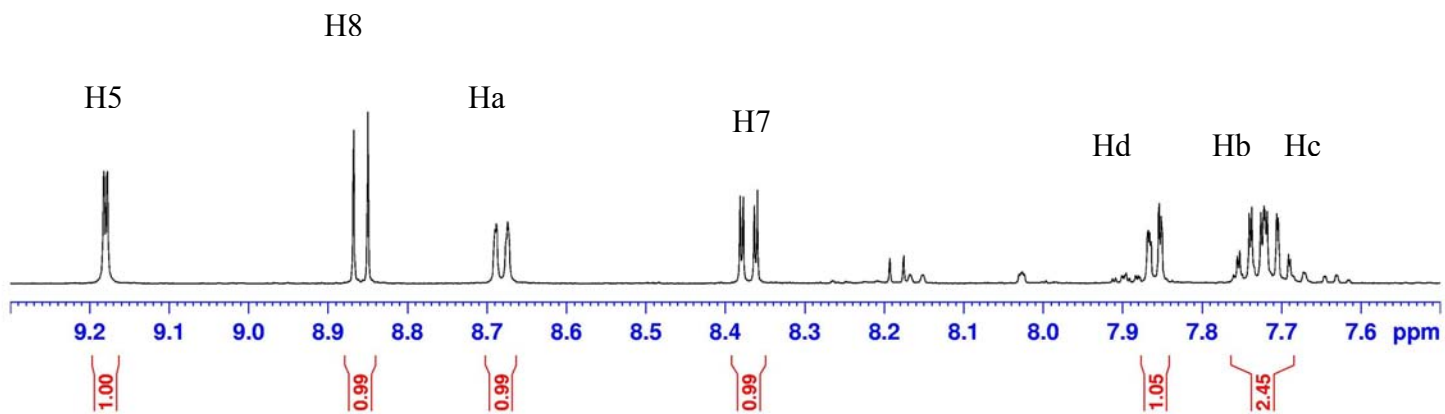

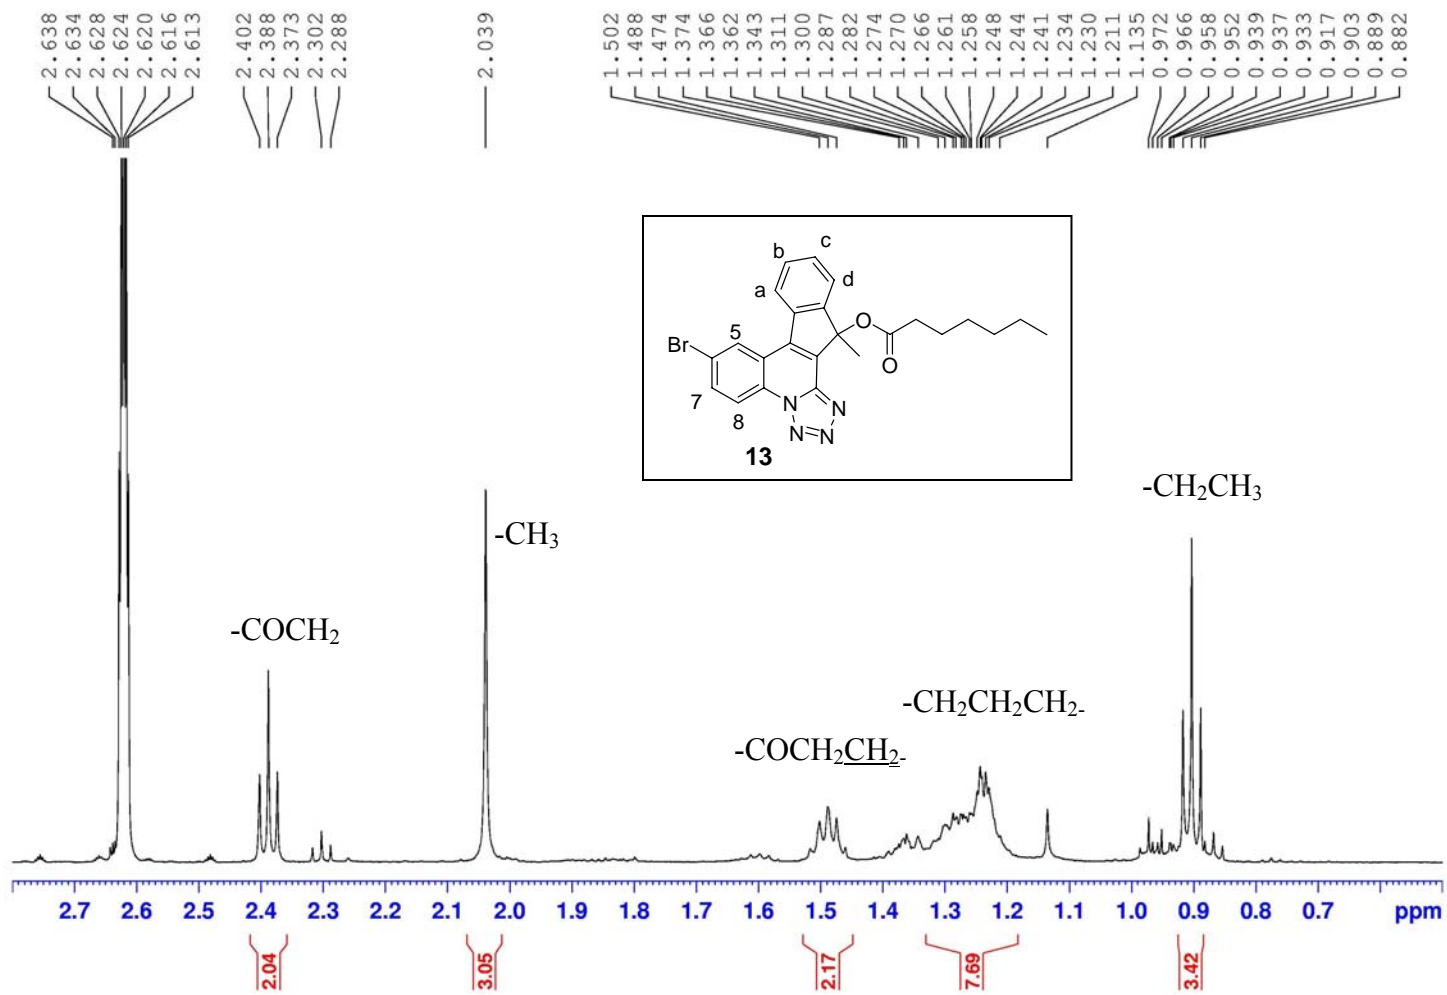

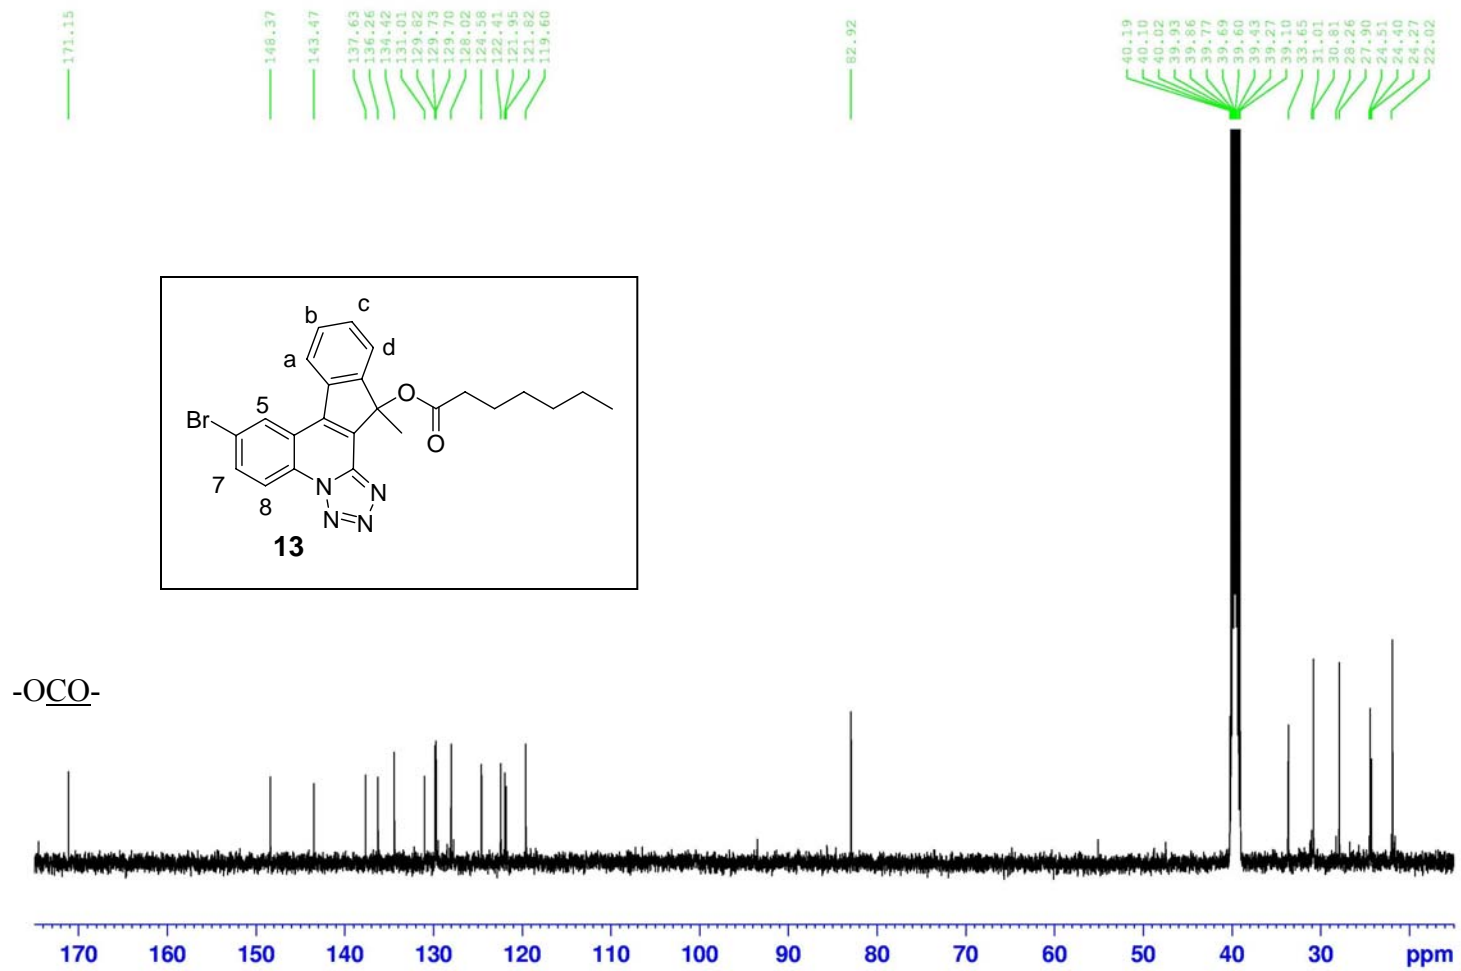

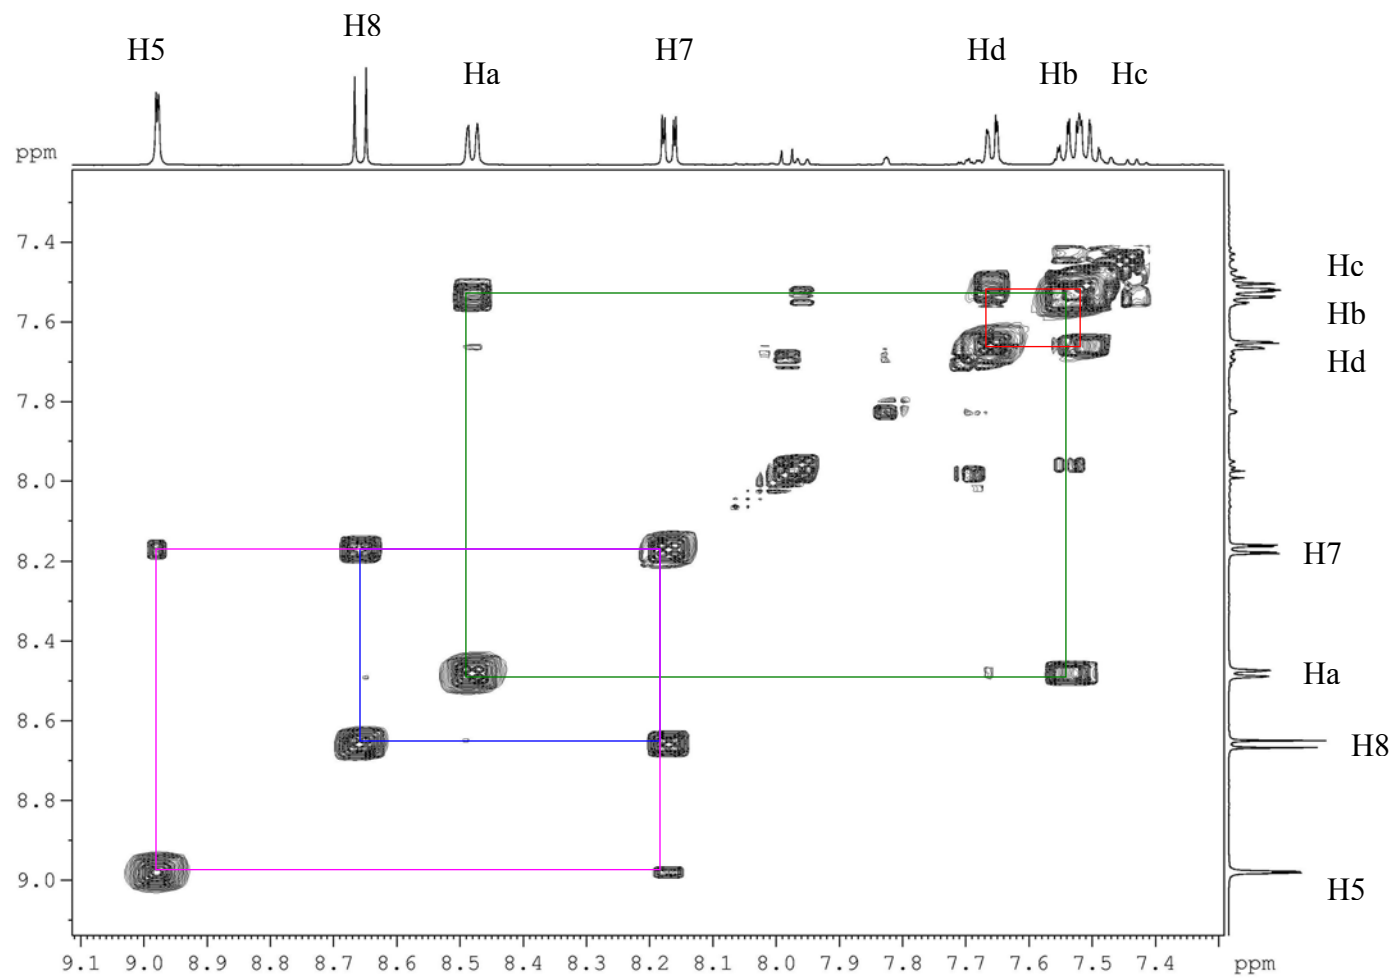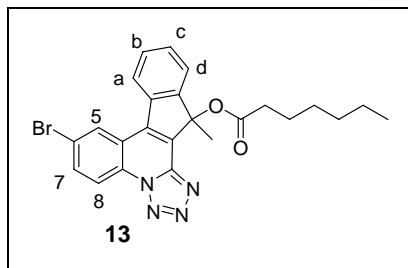

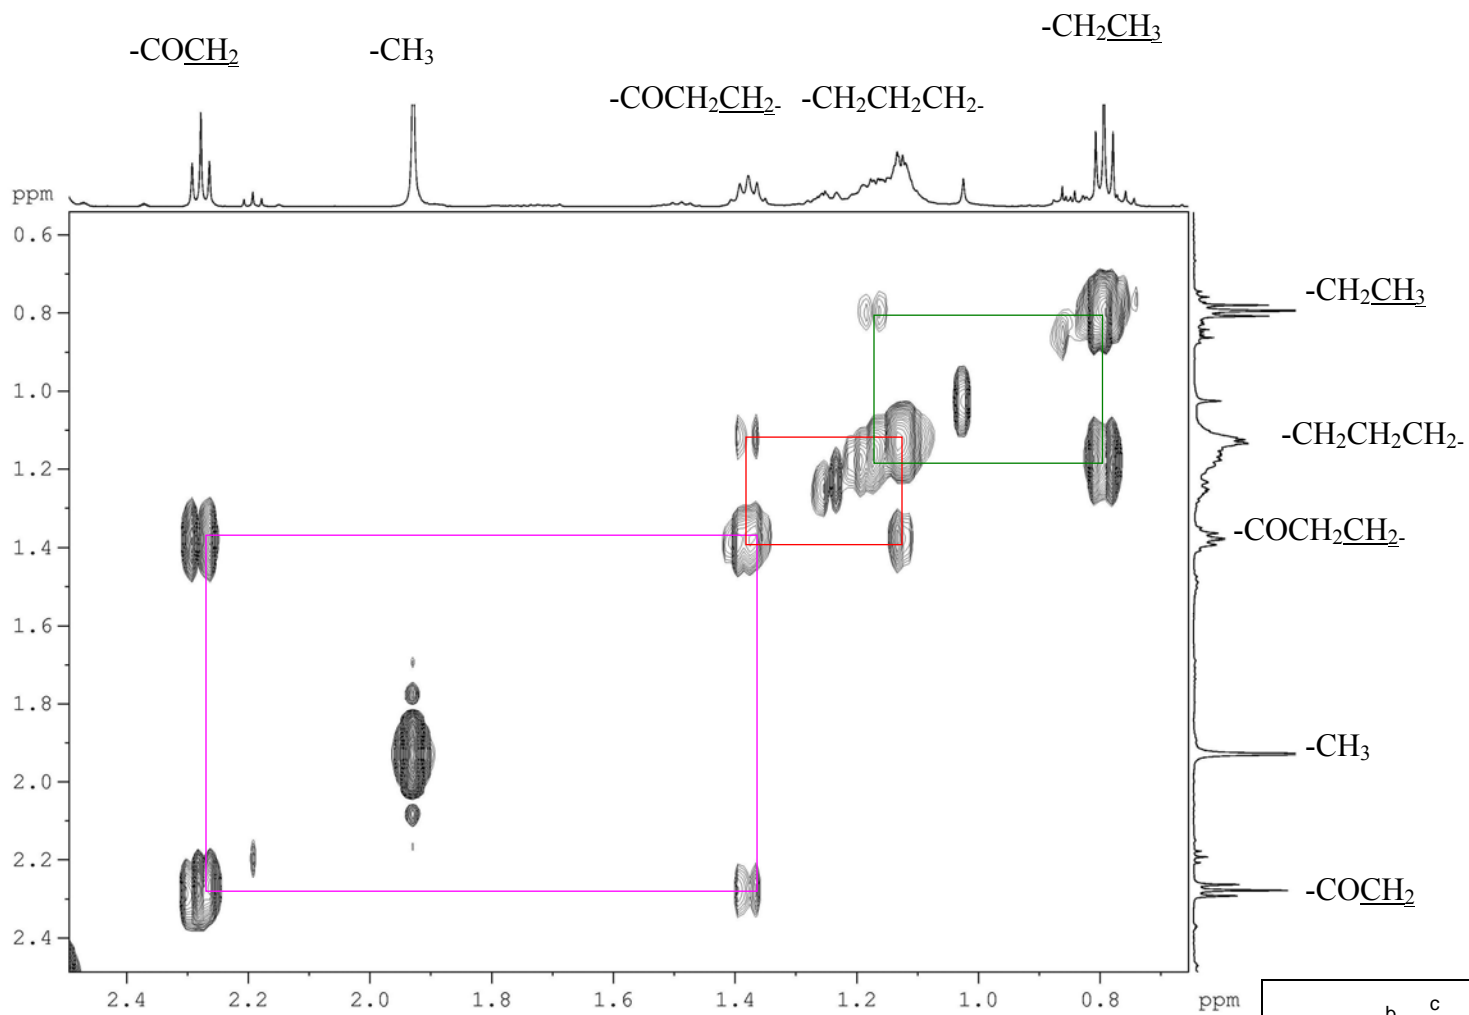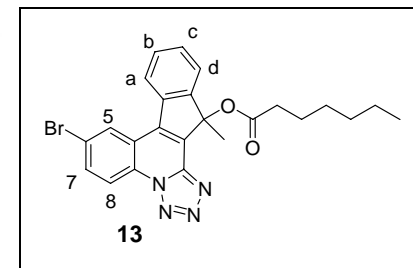

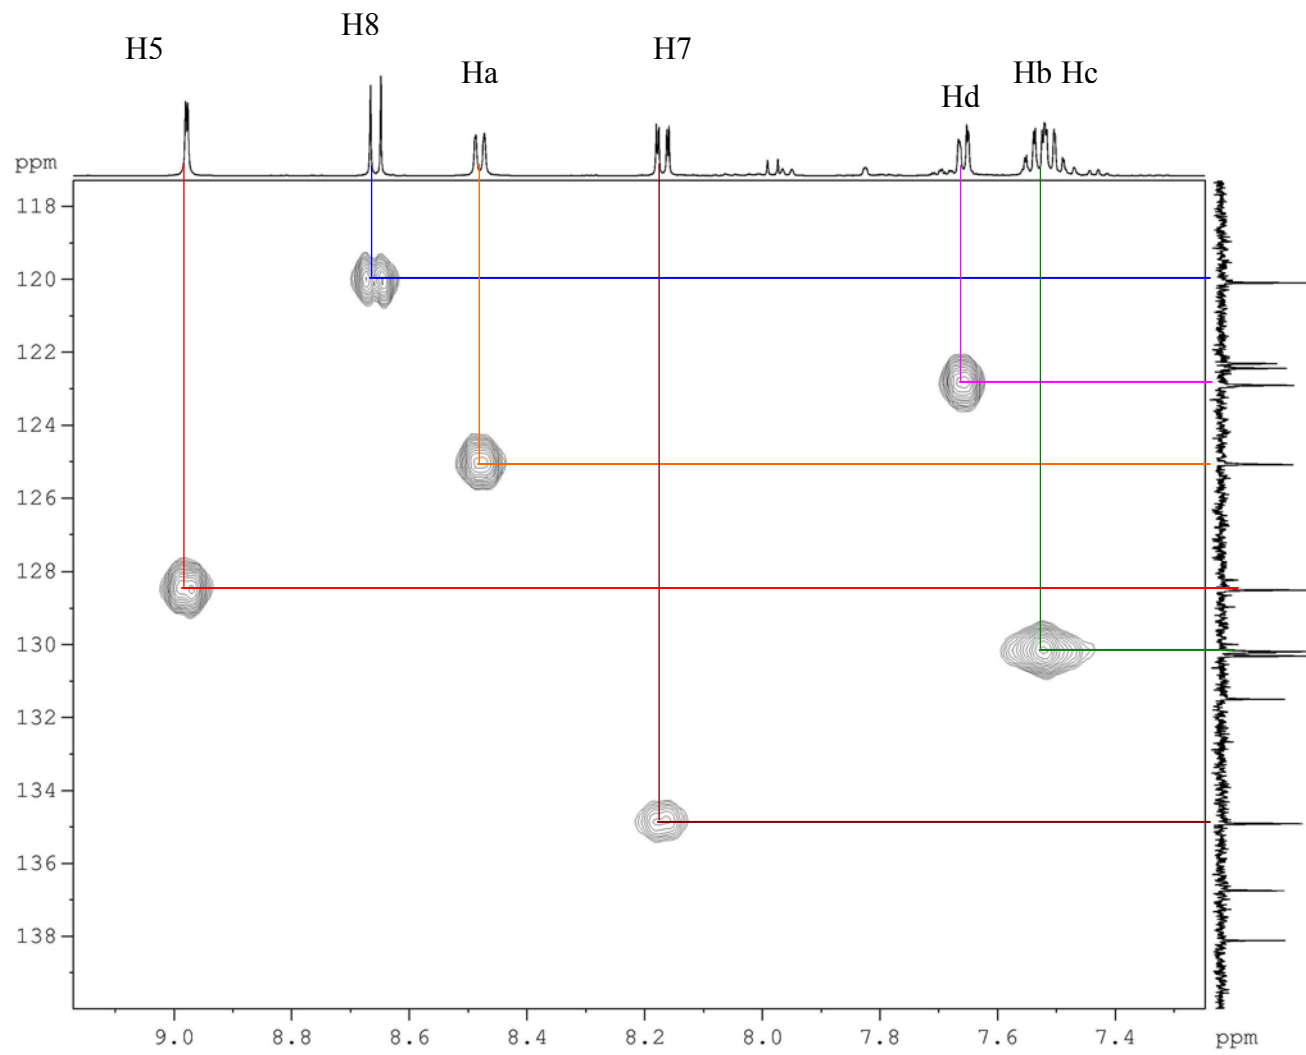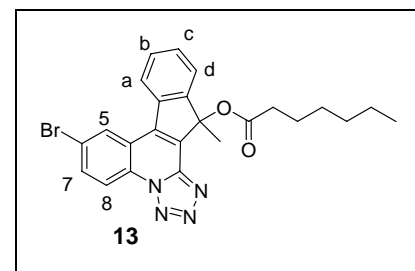

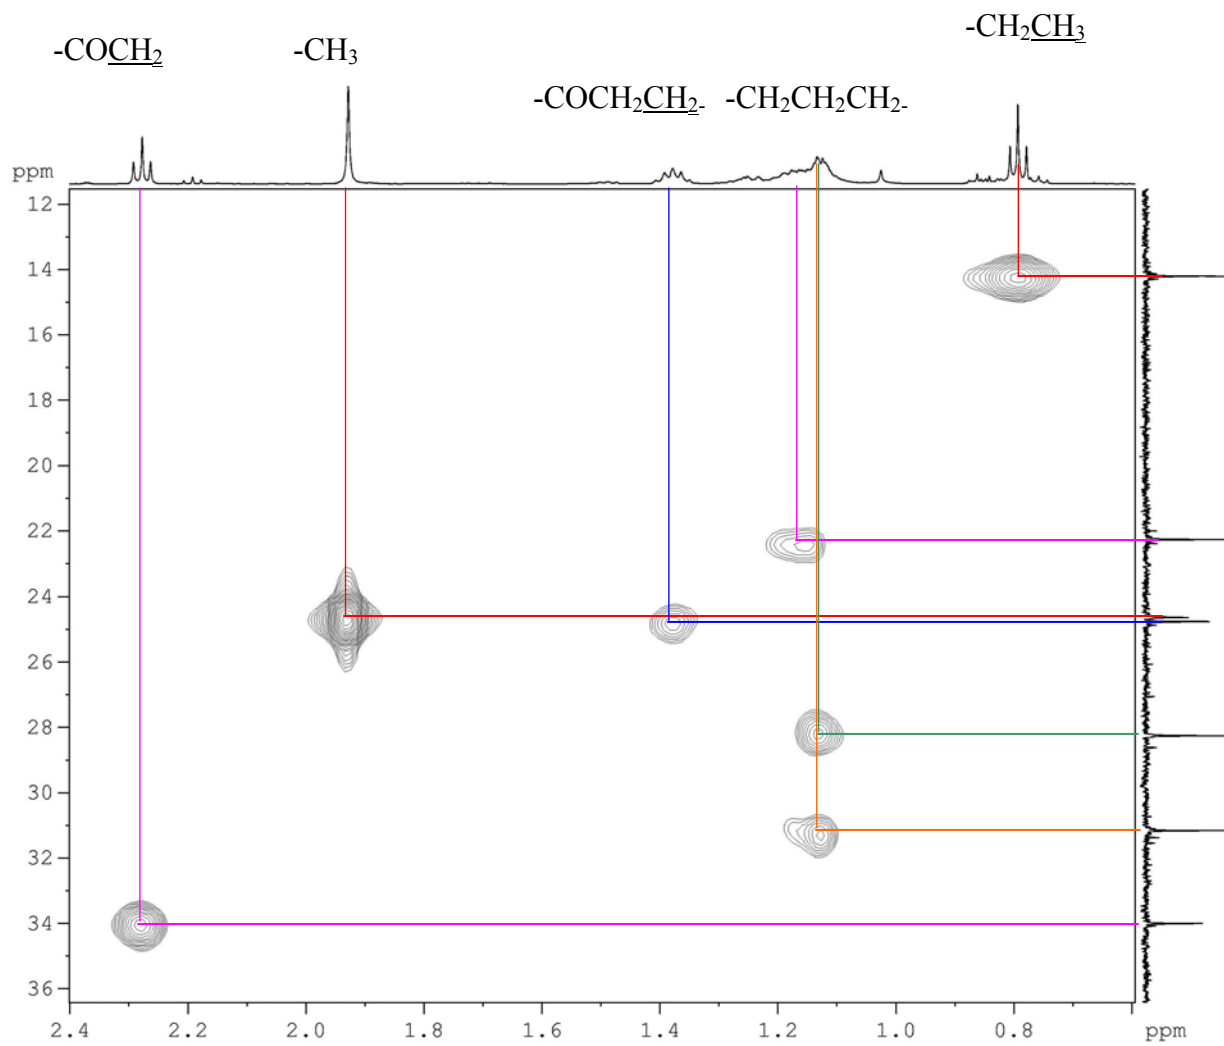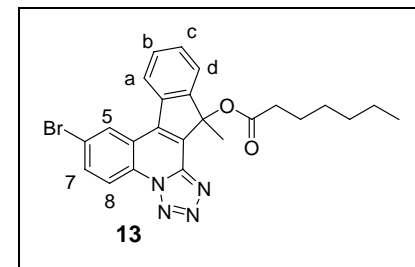

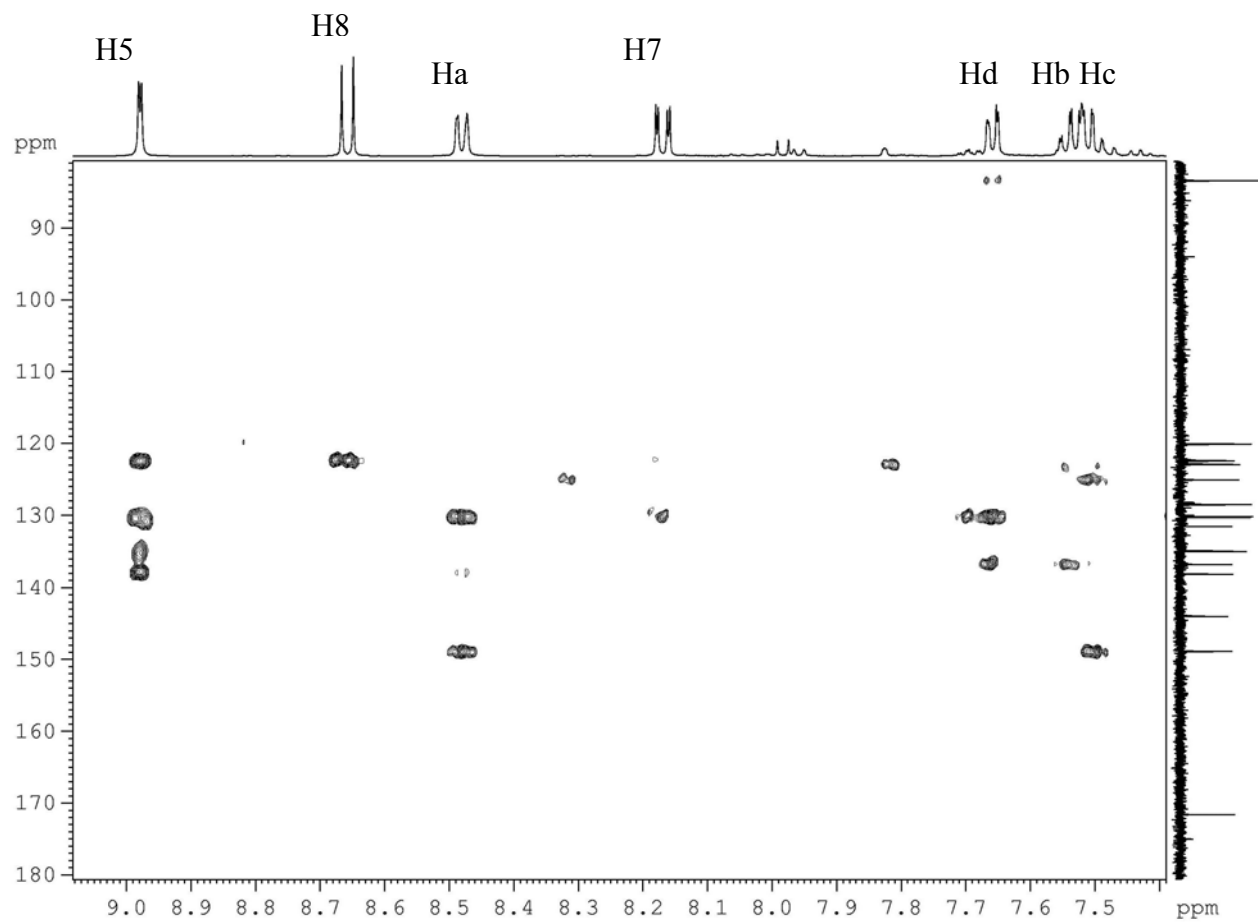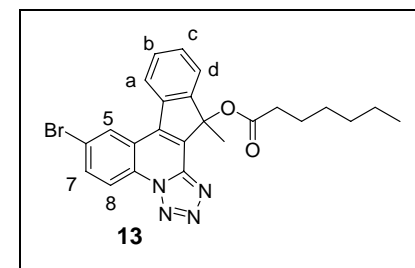



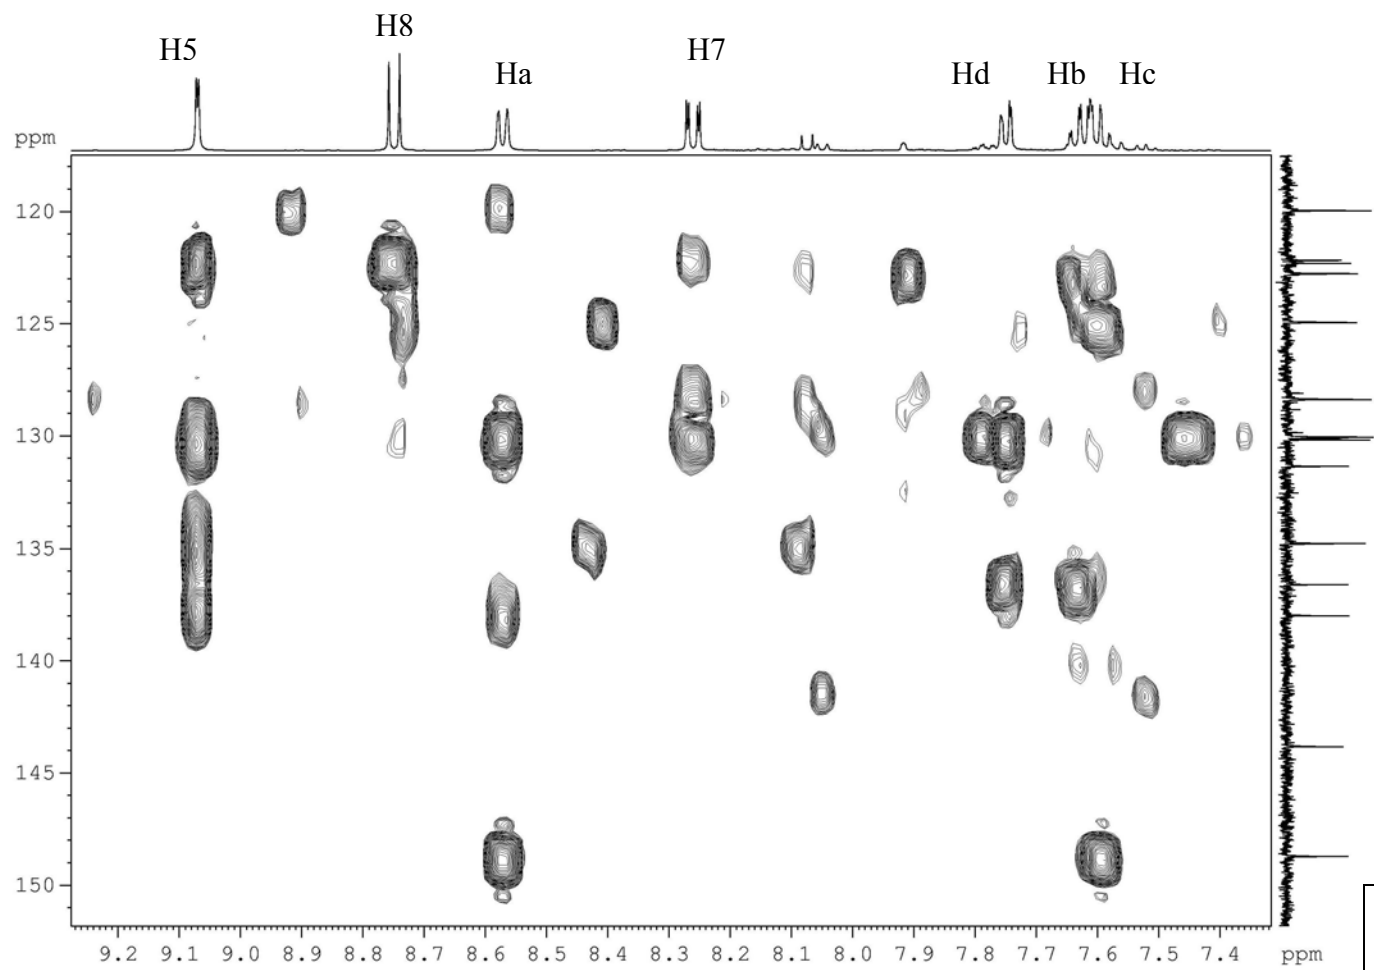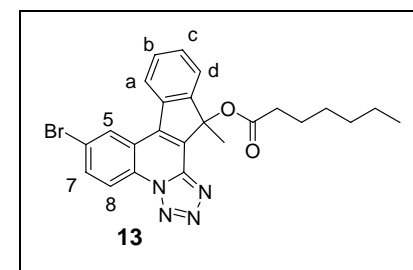

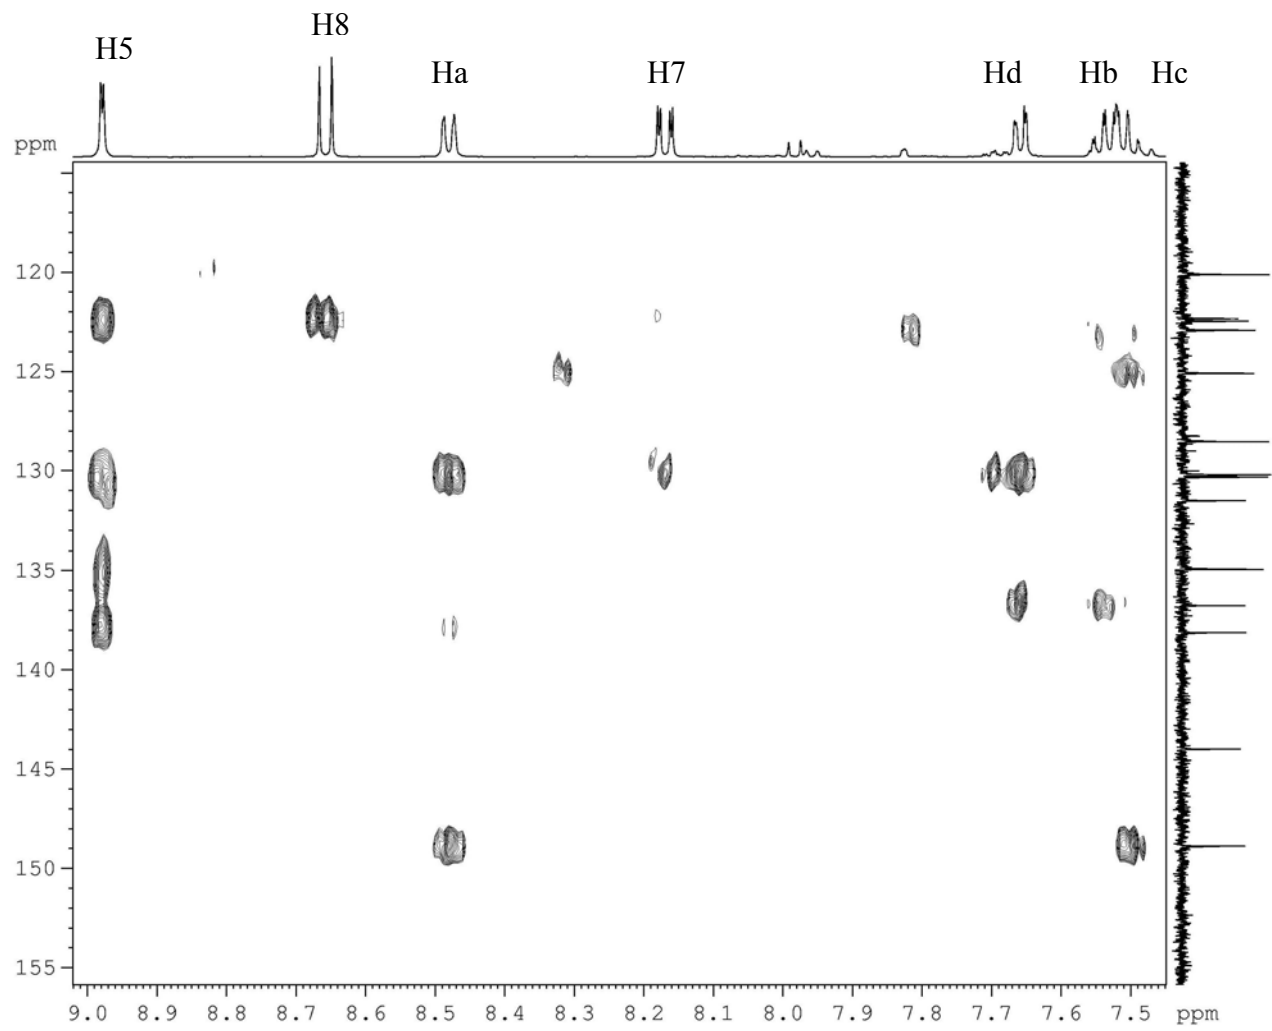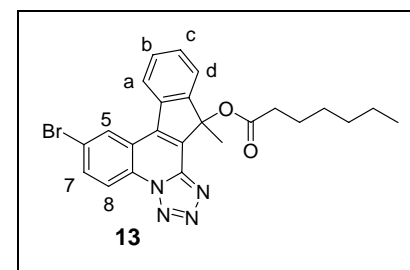

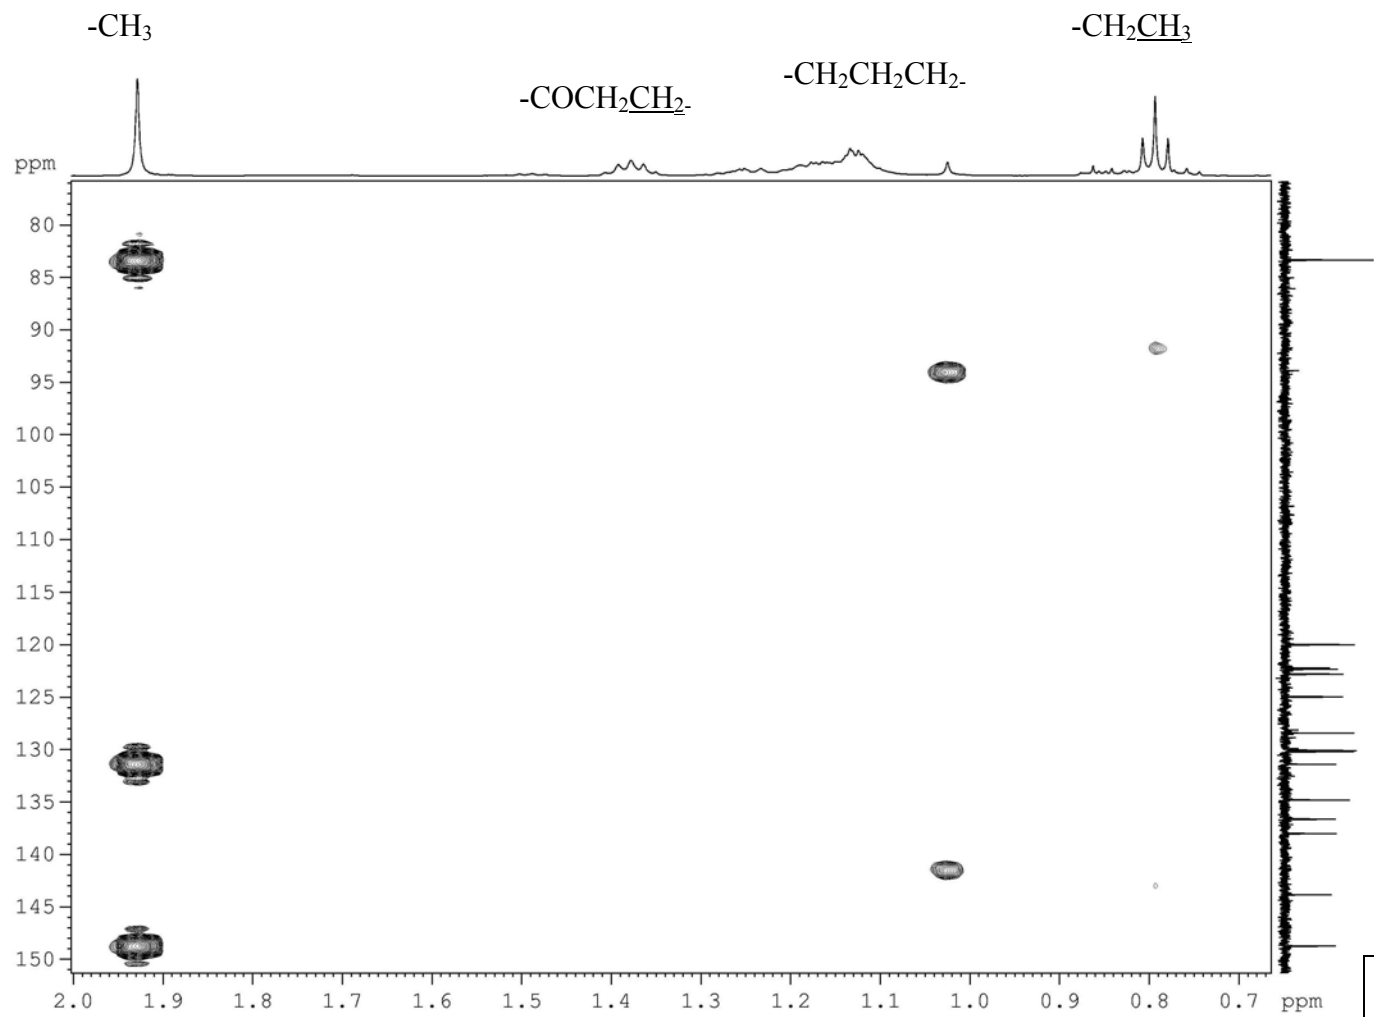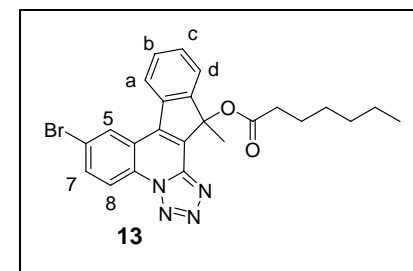

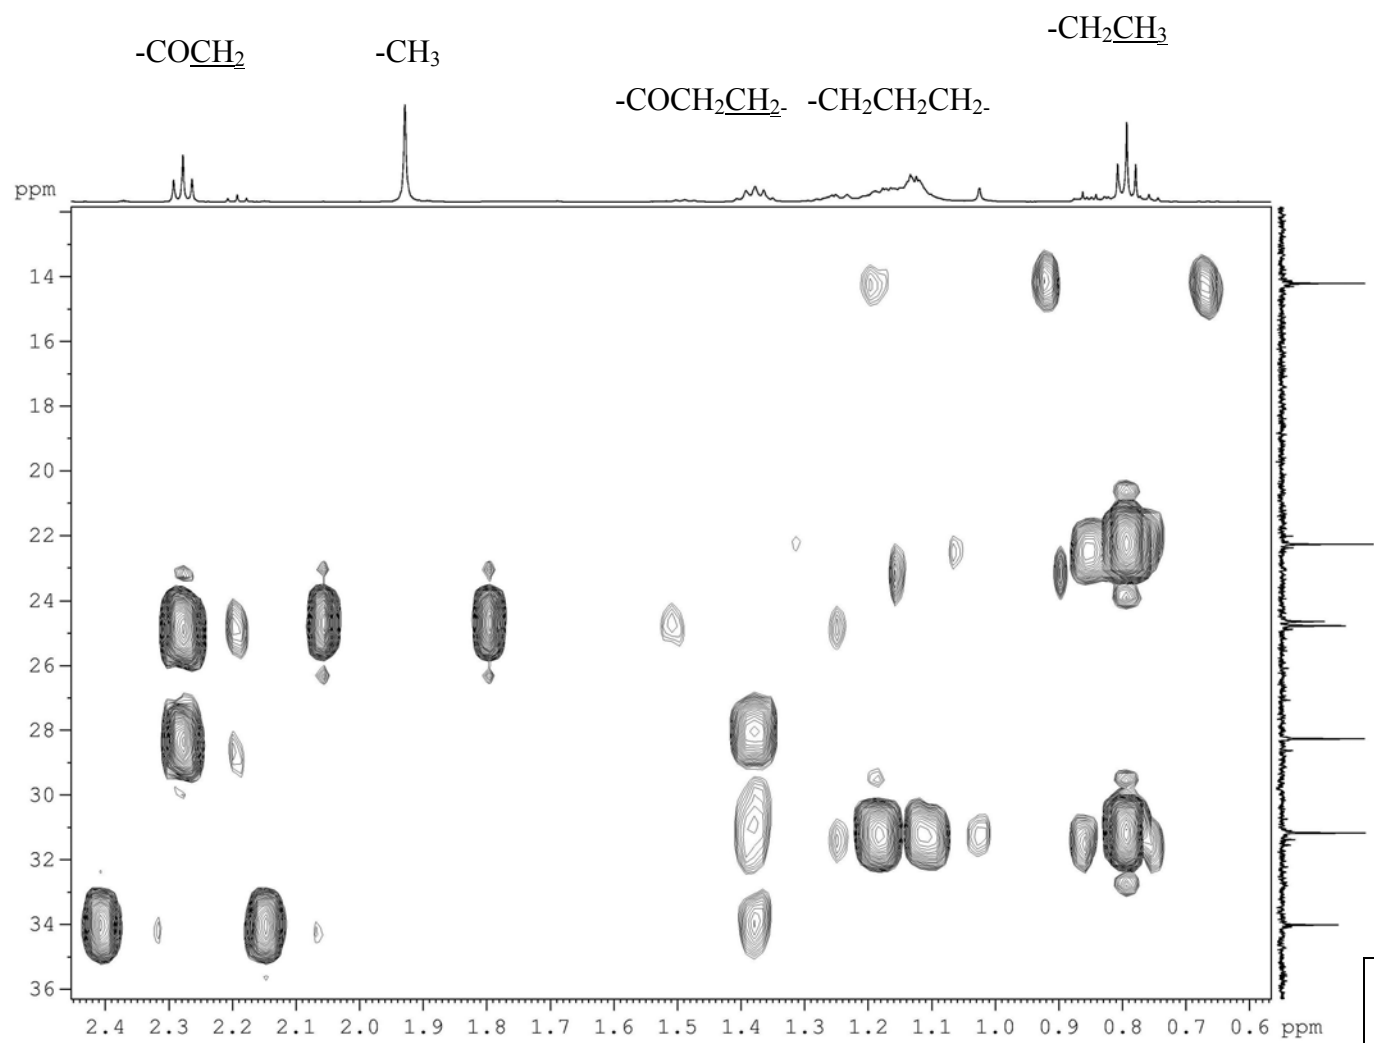

Sample Name: CR080-97-53-53A

INDIA  
Acq. Time: 15:20

Acq. Date: Friday, December 04, 2009

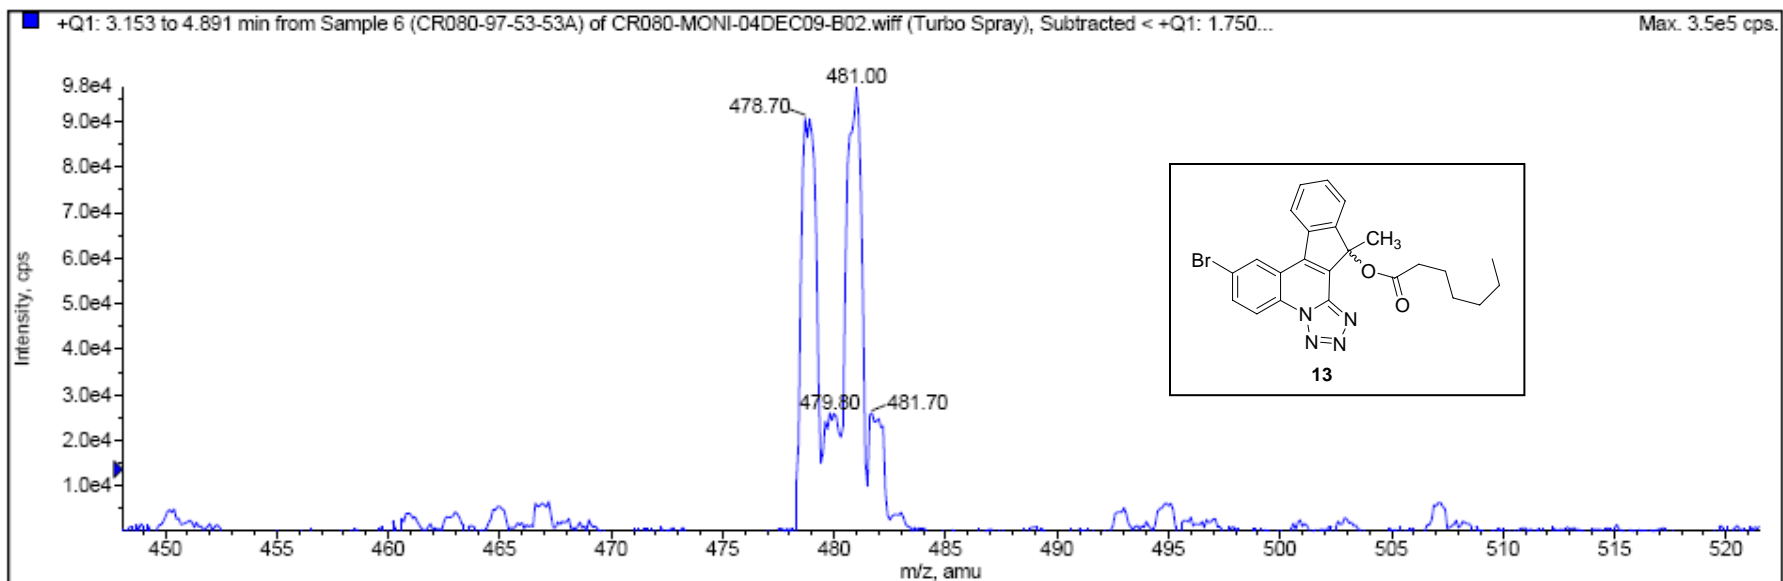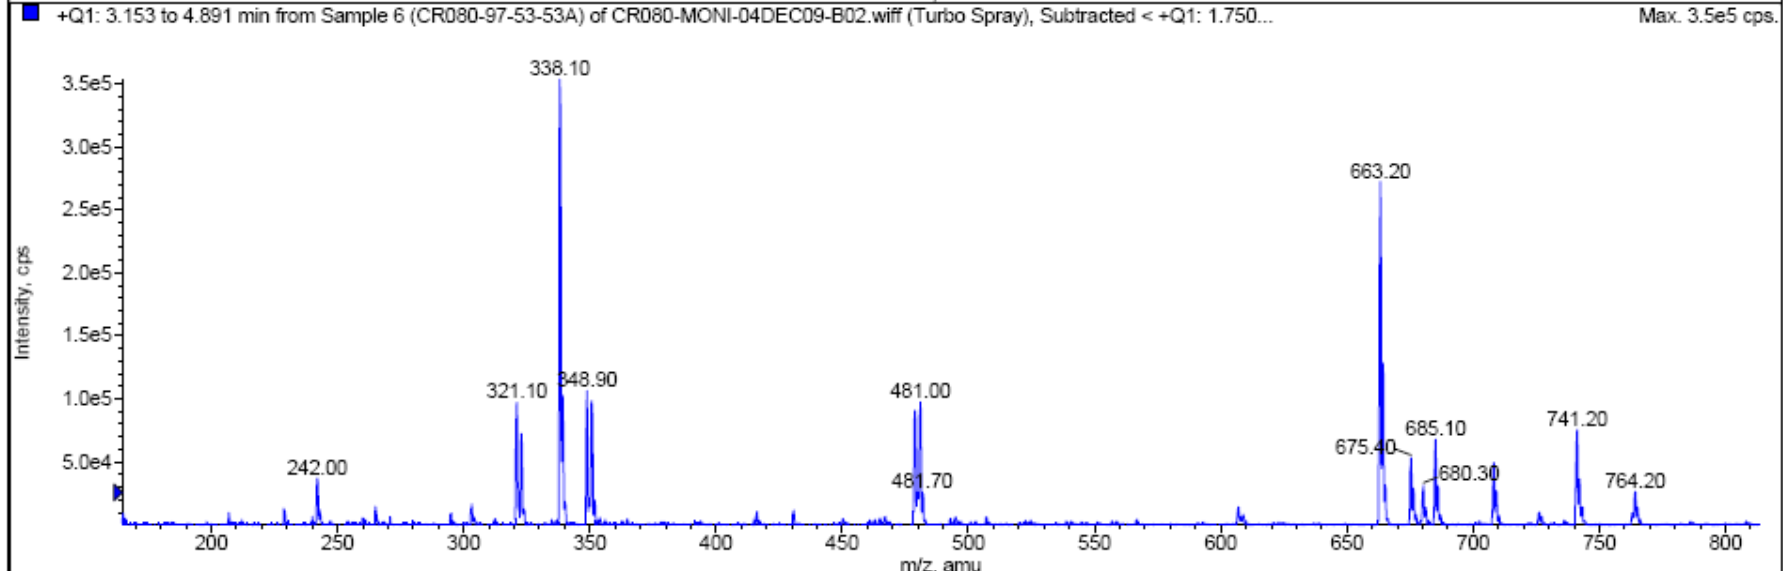

\*Sample Comment: [M+H] 480      Expected      \*\*Analyzed By :      \*\*Checked By :

Sample Name: CR080-97-53A

Acq. Time: 15:20

Acq. Date: Friday, December 04, 2009

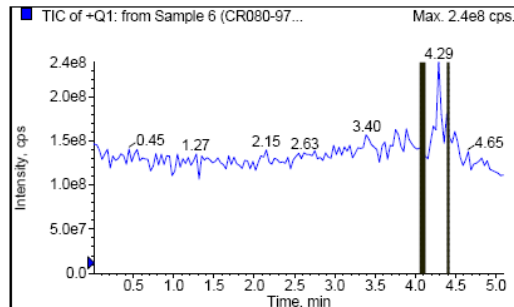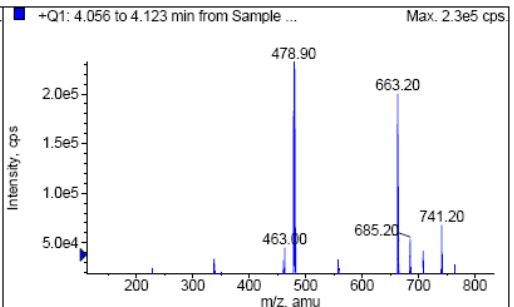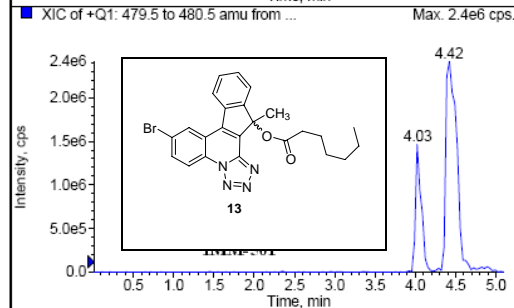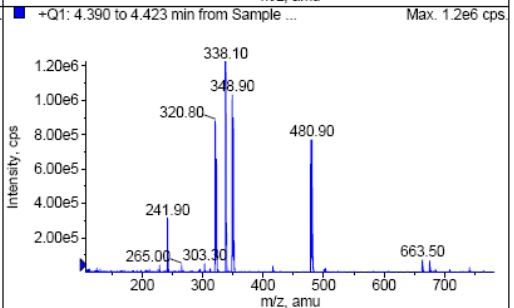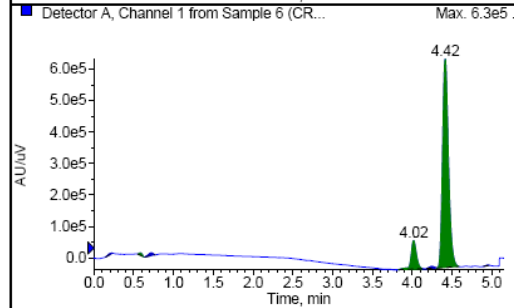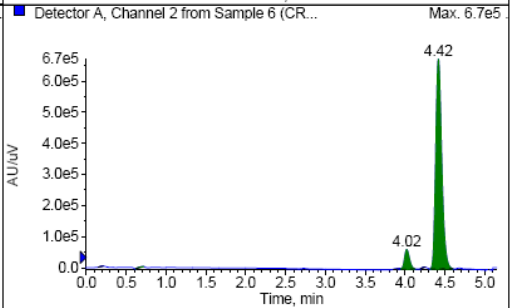

Peak List for "Detector A, Channel 1 from Sample 6 (CR080-97-53-5"

|   | Time (min) | Area (counts) | %Area   | Height    |
|---|------------|---------------|---------|-----------|
| 1 | 0.2221     | 1.0097e4      | 0.2606  | 2068.1318 |
| 2 | 0.5832     | 1.8688e4      | 0.4824  | 7374.1384 |
| 3 | 0.7210     | 3.4376e4      | 0.8873  | 8704.5195 |
| 4 | 4.0207     | 4.0995e5      | 10.5814 | 9.0225e4  |
| 5 | 4.2487     | 2.4120e4      | 0.6226  | 5662.2632 |
| 6 | 4.4176     | 3.3733e6      | 87.0690 | 6.6245e5  |
| 7 | 4.9575     | 3746.0716     | 0.0967  | 1071.9310 |

Peak List for "Detector A, Channel 2 from Sample 6 (CR080-97-53-5"

|   | Time (min) | Area (counts) | %Area   | Height    |
|---|------------|---------------|---------|-----------|
| 1 | 0.2037     | 2733.6839     | 0.0725  | 954.6030  |
| 2 | 0.7117     | 7949.8087     | 0.2107  | 1161.9433 |
| 3 | 3.9303     | 1.1425e4      | 0.3028  | 2808.9083 |
| 4 | 4.0191     | 2.6394e5      | 6.9958  | 6.2609e4  |
| 5 | 4.2405     | 3388.6255     | 0.0898  | 1331.3241 |
| 6 | 4.4170     | 3.4833e6      | 92.3284 | 6.7416e5  |

LCMS-1 REACH MONT (TFA Buffer)

Analysed By :

Sample Name : CR080-97-53-53A  
 Sample ID : CR080-97-53-53A  
 Column : Gemini C-18 (150 x 4.6 mm)  
 Vial # : 58  
 Inj. Volume : 1 uL  
 Tray # : 1  
 Acquired by : AVINASH

Data File Name : 15-02-10\_CR080-97-53-53A\_06.lcd  
 Method File Name : GENERAL\_B1.lcm  
 Batch File Name : 150210.lcb  
 Data Acquired : 2/15/2010 1:23:16 PM  
 Data Processed : 2/15/2010 1:45:20 PM  
 Ref.No.: DI/A0257/94

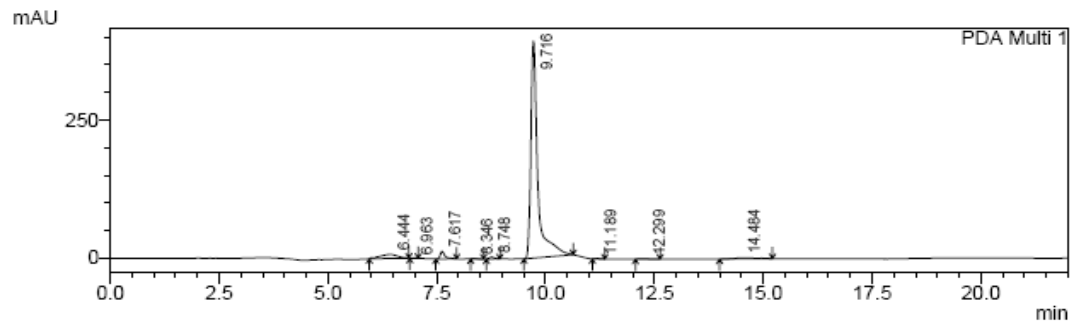

1 PDA Multi 1/242nm 4nm

PeakTable

PDA Ch1 242nm 4nm

| Peak# | Ret. Time | Area    | Area % | Height |
|-------|-----------|---------|--------|--------|
| 1     | 6.44      | 202832  | 4.23   | 7133   |
| 2     | 6.96      | 3518    | 0.07   | 752    |
| 3     | 7.62      | 103626  | 2.16   | 13846  |
| 4     | 8.35      | 4318    | 0.09   | 646    |
| 5     | 8.75      | 27218   | 0.57   | 3593   |
| 6     | 9.72      | 4375879 | 91.31  | 392648 |
| 7     | 11.19     | 7426    | 0.15   | 886    |
| 8     | 12.30     | 7291    | 0.15   | 580    |
| 9     | 14.48     | 60431   | 1.26   | 1872   |
| Total |           | 4792539 | 100.00 | 421956 |

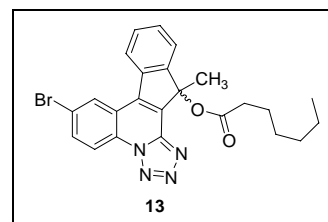

CHEMBIOTEK A TCG Lifesciences Enterprises, PUNE

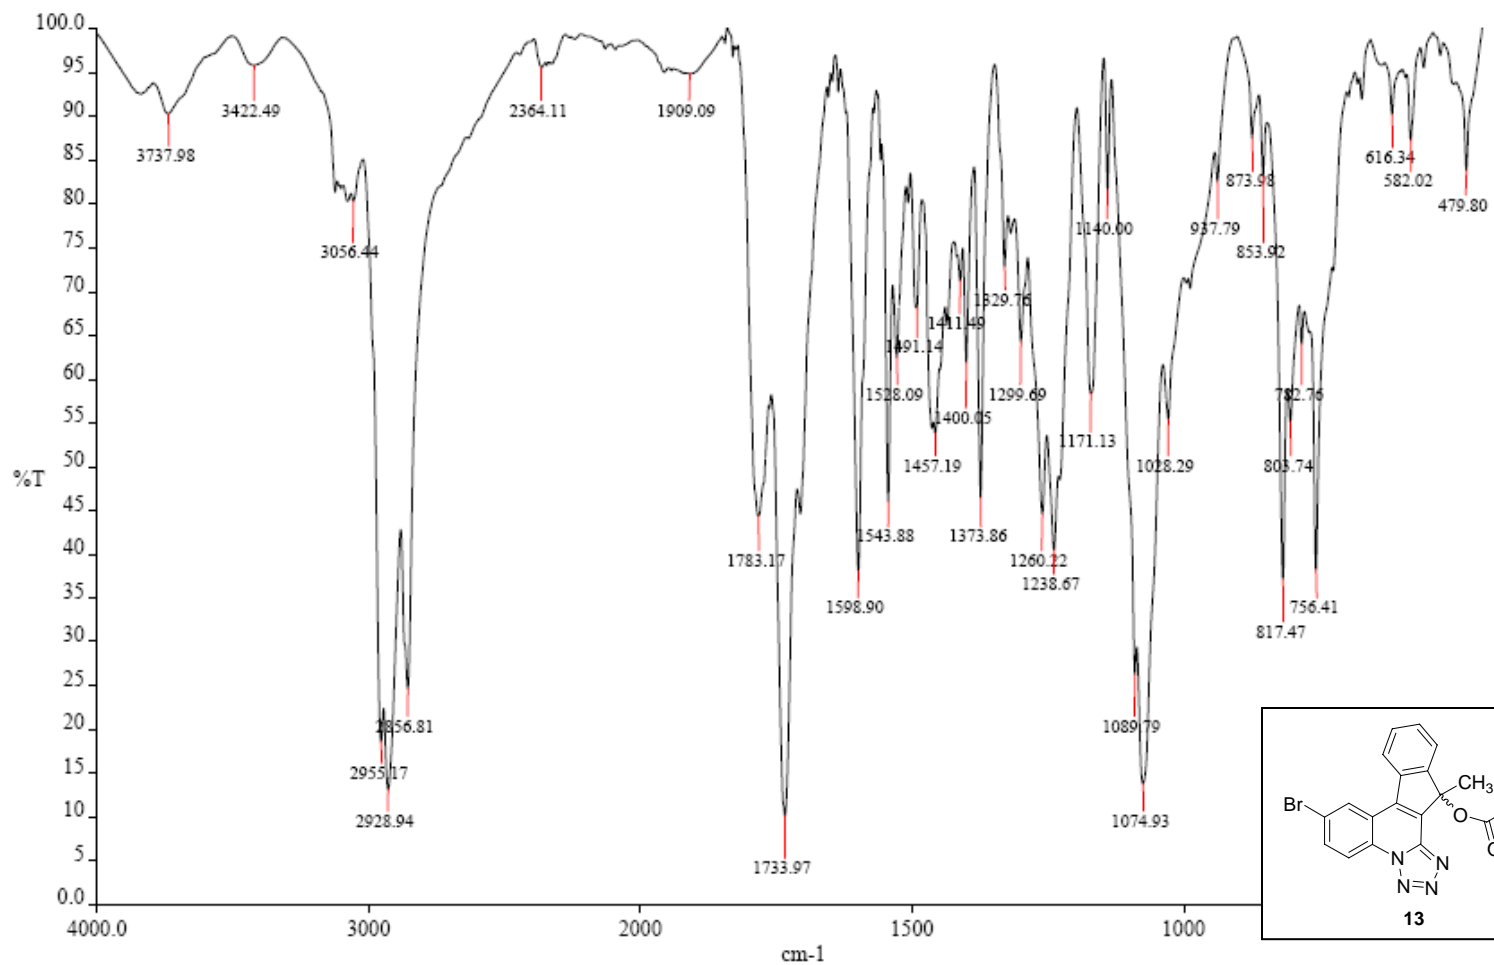

Spectrum Name: CR080-97-53-53A.sp

Analyst: GANESH

Accumulations: 16

Time: 10:30:35 AM

Description: CR080-97-53-53A IN KBr

Resolution: 4.00 cm-1

Date: 2/3/2010



14

NAME CR080-96-161-161A  
EXPNO 1  
PROCNO 20100421  
Date\_ 8.57  
Time spect  
INSTRUM 5 mm DUL 13C-1  
PULPROG zg30  
TD 32768  
SOLVENT CDC13  
NS 8  
DS 0  
SWH 8012.820 Hz  
FIDRES 0.244532 Hz  
AQ 2.0447731 sec  
RG 181  
DW 62.400 usec  
DE 6.00 usec  
TE 293.8 K  
D1 3.00000000 sec  
TD0 1

----- CHANNEL f1 -----  
NUC1 1H  
P1 12.50 usec  
PL1 -1.00 dB  
SFO1 400.1324710 MHz  
SI 16384  
SF 400.1300128 MHz  
WDW EM  
SSB 0  
LB 0.30 Hz  
GB 0  
PC 0.50

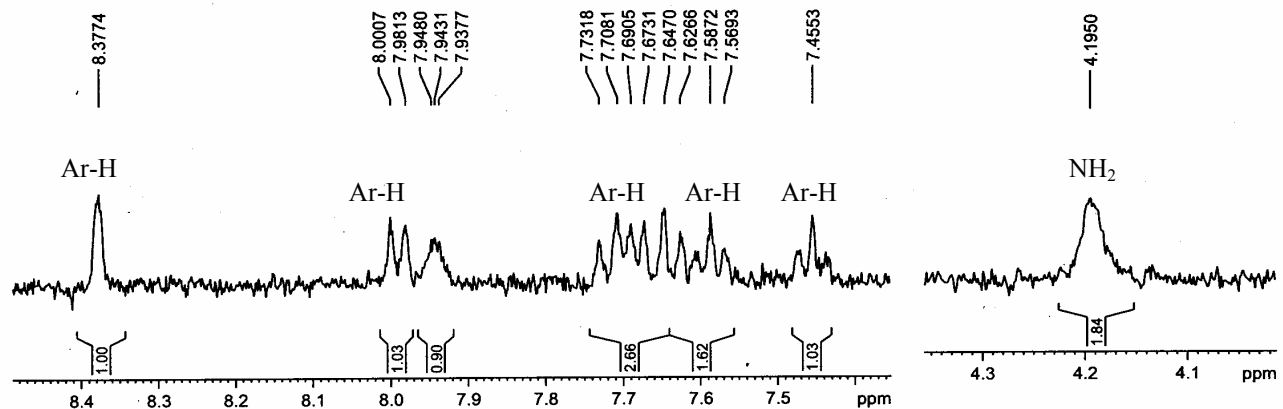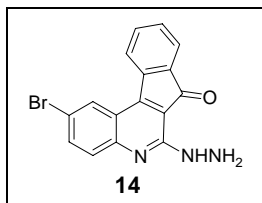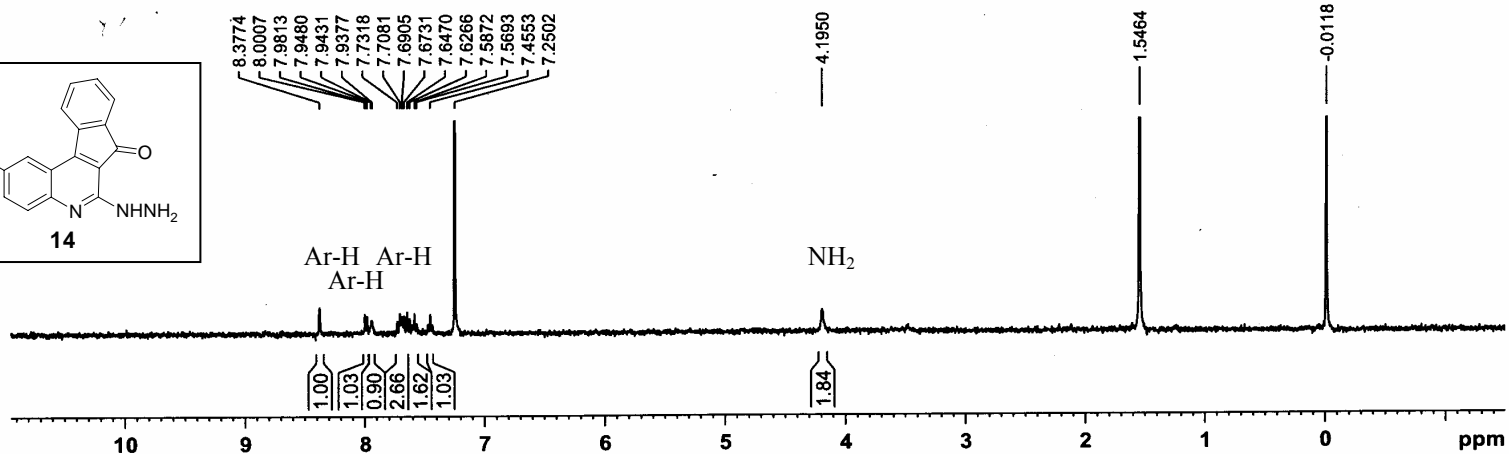

Analysed by: Yogita

NAME CR985-86-161-161A  
 EXPNO 2  
 PROCNO 1  
 Date\_ 20100422  
 Time 10.13  
 INSTRUM spect  
 PROBHD 5mm QNP 13C-1  
 PULPROG zg30  
 TD 32768  
 SOLVENT CDCl3  
 NS 0  
 DS 0  
 SWH 6012.620 Hz  
 FIDRES 0.244532 Hz  
 AQ 2.0447731 sec  
 RG 101  
 DW 62.400 usec  
 DE 5.00 usec  
 TE 294.4 K  
 D1 3.0000000 sec  
 TD0 1

\*\*\*\*\* CHANNEL f1 \*\*\*\*\*  
 NUC1 1H  
 P1 12.50 usec  
 PL1 -1.90 dB  
 SFO1 400.1326710 MHz  
 SI 16384  
 SF 400.1326710 MHz  
 WDW EM  
 SSB 0  
 LB 0.30 Hz  
 GB 0  
 PC 0.50

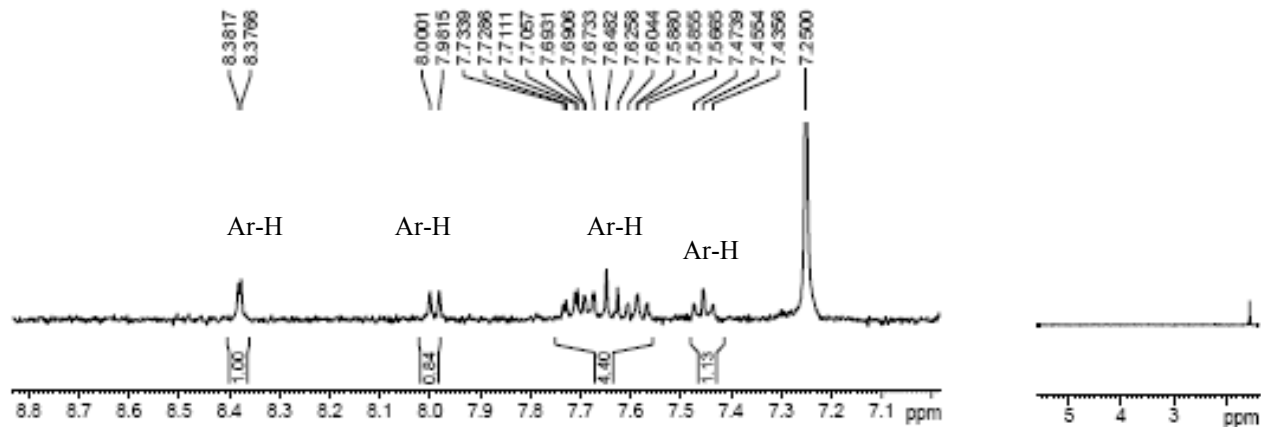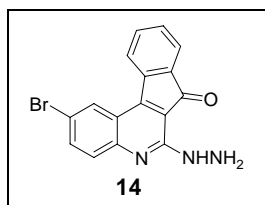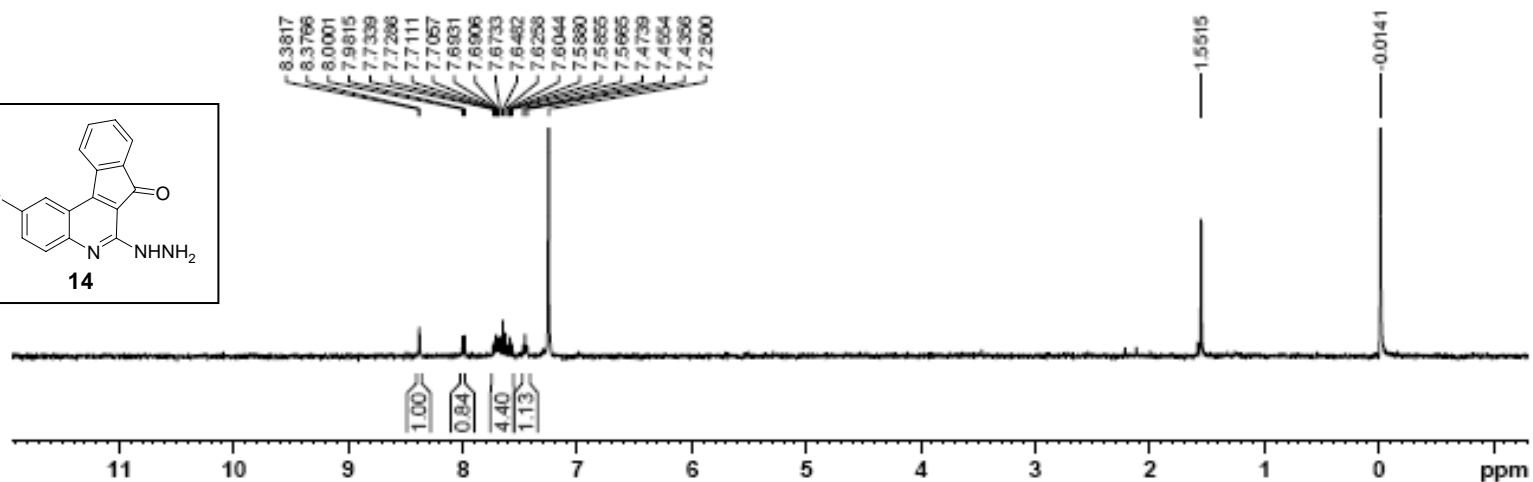

Sample Name: CR080-96-161-161-A-IIND SPOT Acq. Time: 17:29 Acq. Date: Monday, April 19, 2010

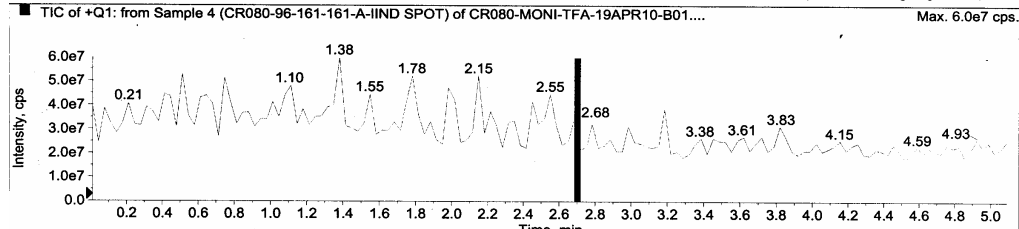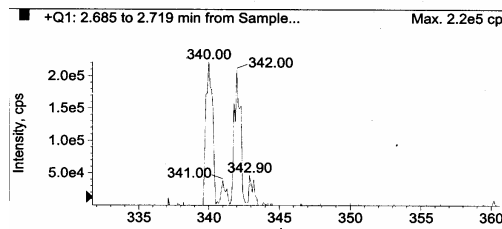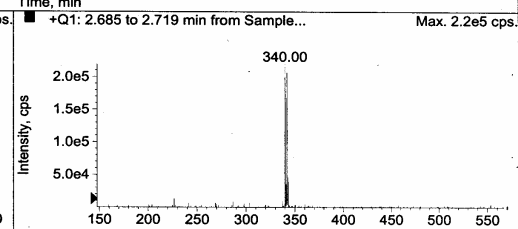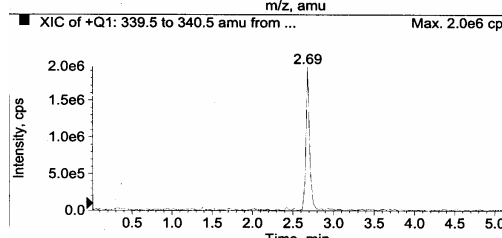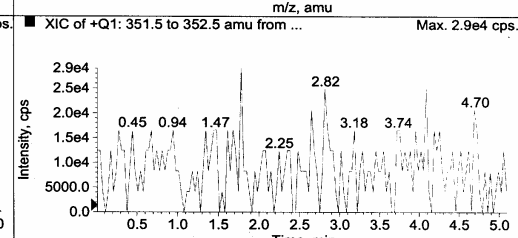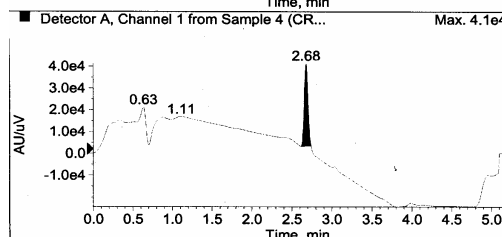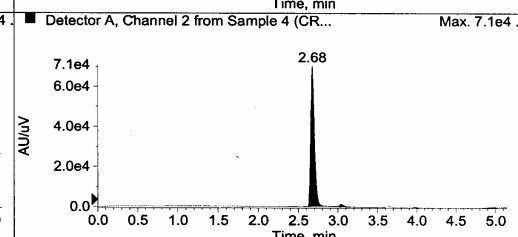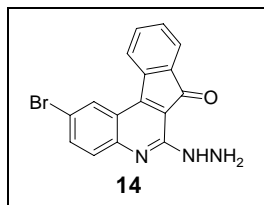

Peak List for "Detector A, Channel 1 from Sample 4 (CR080-96-161-161-A-IIND SPOT)"

| Time (min) | Area (counts) | %Area    | Height  |          |
|------------|---------------|----------|---------|----------|
| 1          | 2.6802        | 1.2621e5 | 100.000 | 3.8425e4 |

Peak List for "Detector A, Channel 2 from Sample 4 (CR080-96-161-161-A-IIND SPOT)"

| Time (min) | Area (counts) | %Area     | Height  |           |
|------------|---------------|-----------|---------|-----------|
| 1          | 2.6752        | 2.3972e5  | 96.9652 | 7.0659e4  |
| 2          | 3.0425        | 4433.2904 | 1.7932  | 1229.8433 |
| 3          | 3.9743        | 1508.2804 | 0.6101  | 405.5891  |
| 4          | 4.9362        | 1561.2646 | 0.6315  | 265.1650  |

LCMS 2 Reaction Monitoring (TFA Buffer) Analyzed By :  
 \*Channel 1 at wavelength 220 nm , Channel 2 at wavelength 260 nm

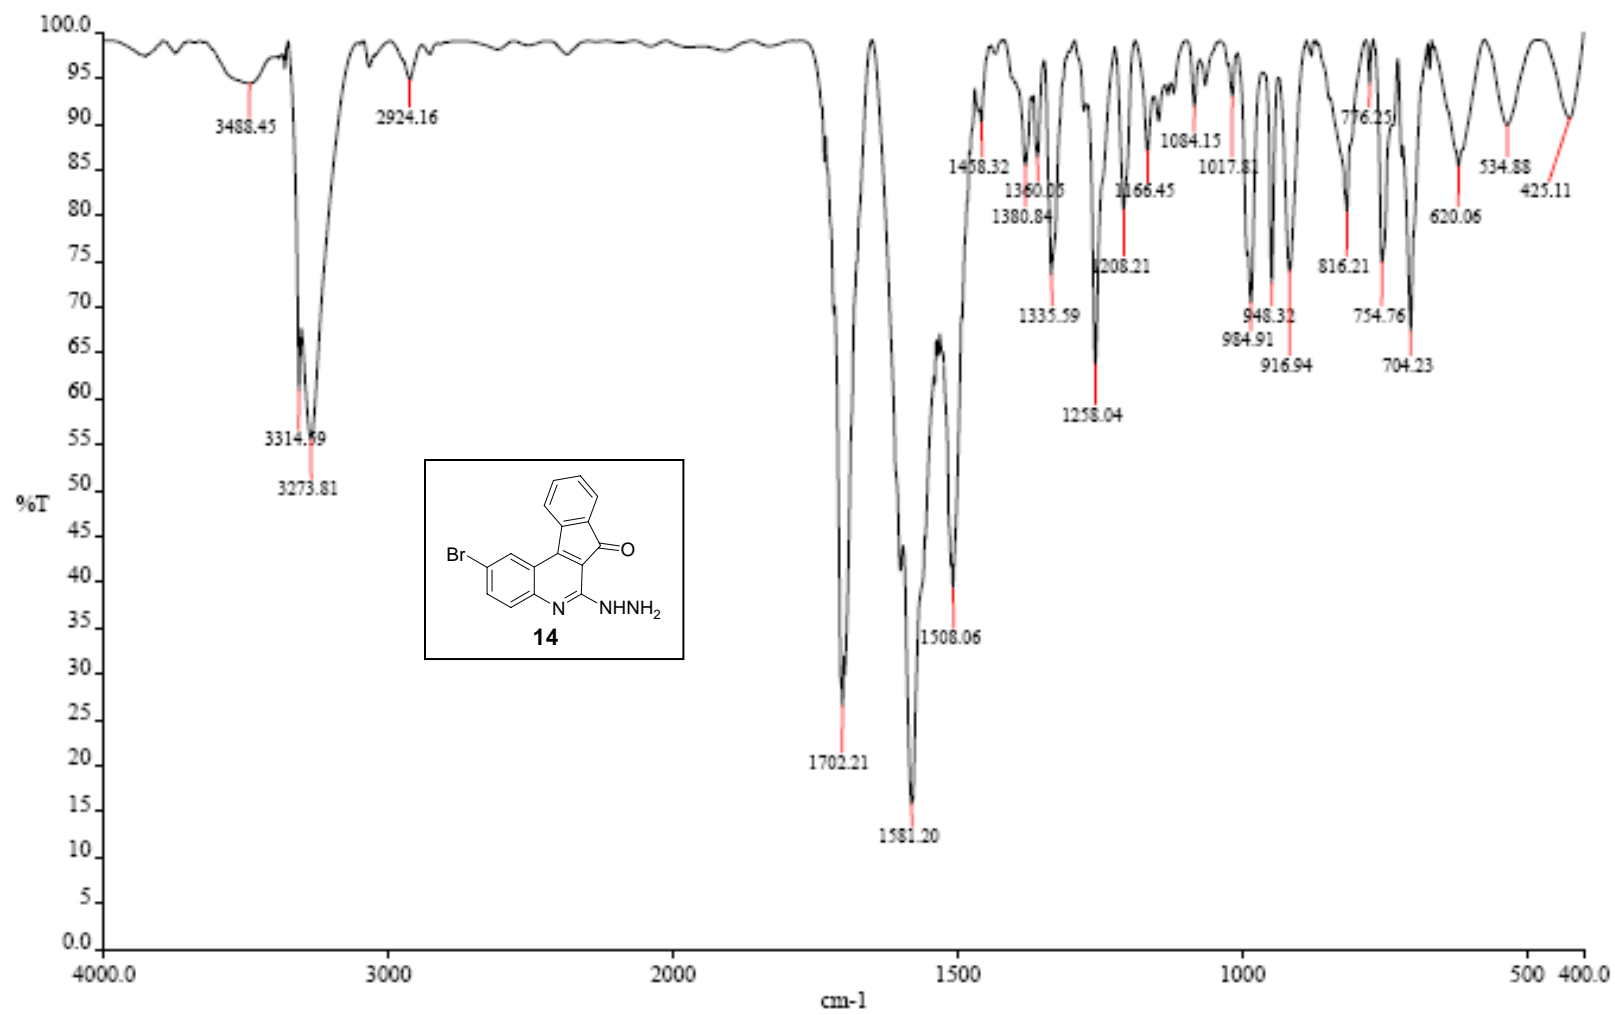

Spectrum Name: CR080-96-161-161A.sp

Analyst: GANESH

Accumulations: 16

Time: 9:22:49 AM

Description: CR080-96-161-161A IN KBr

Resolution: 4.00 cm<sup>-1</sup>

Date: 4/23/2010

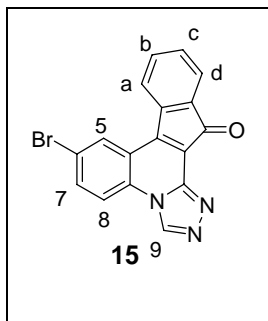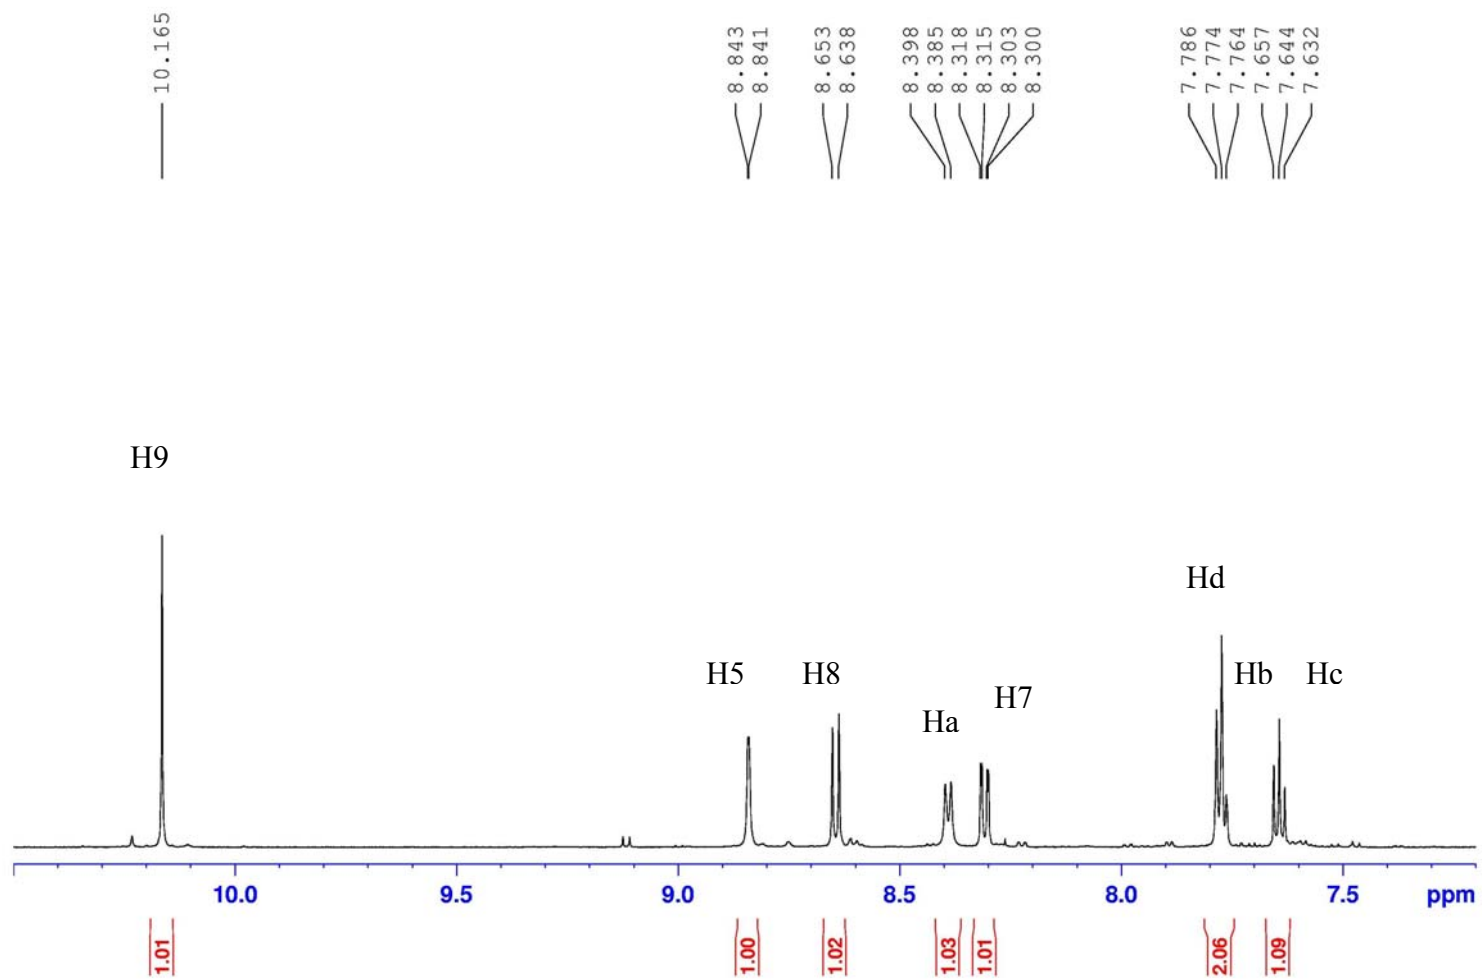

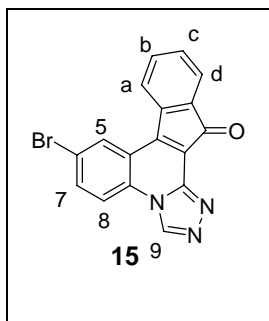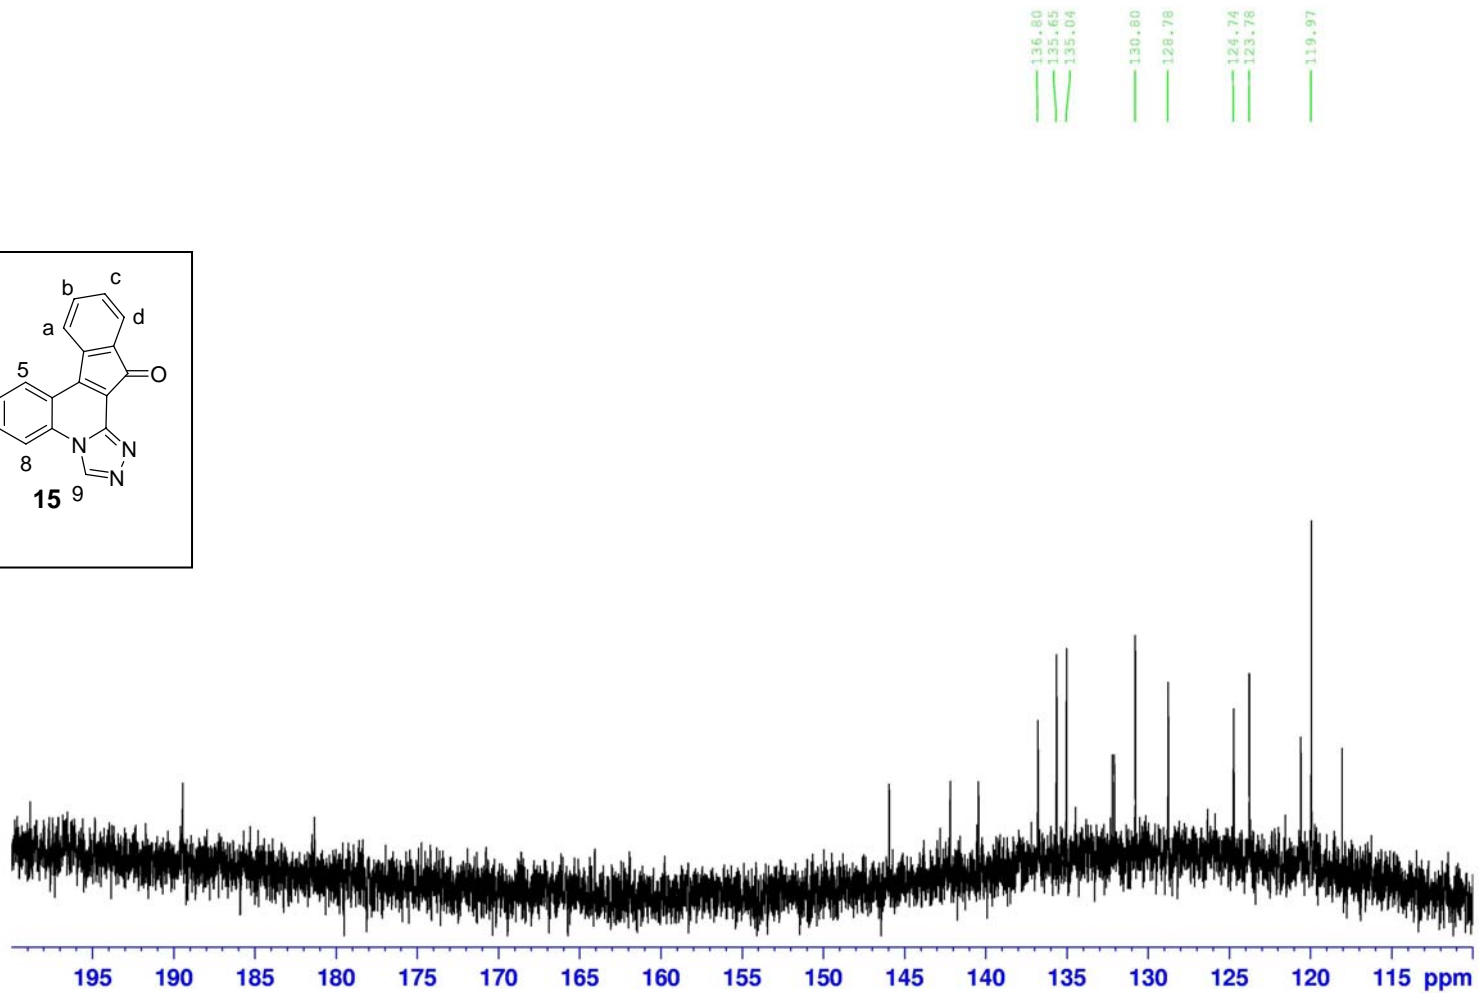

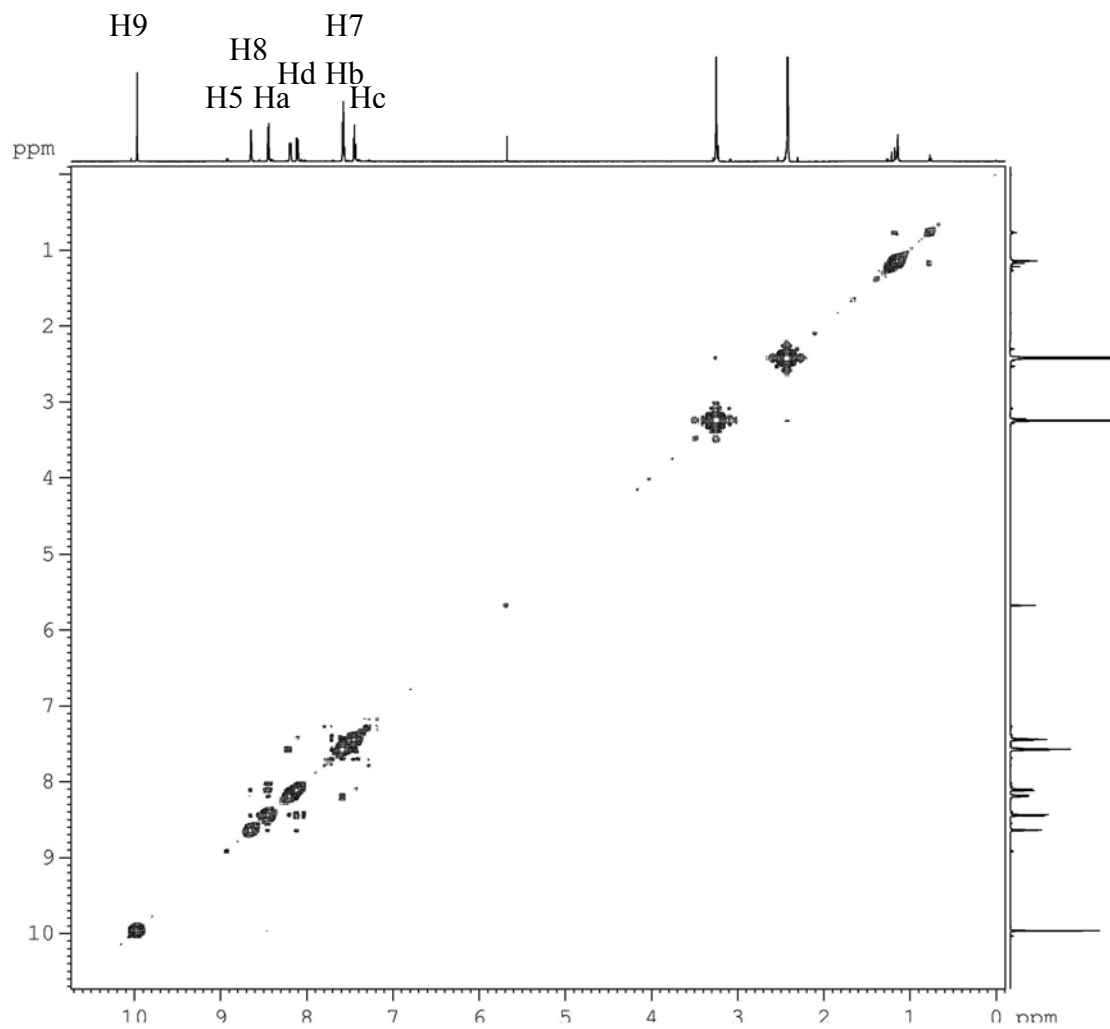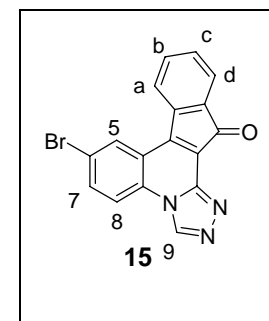

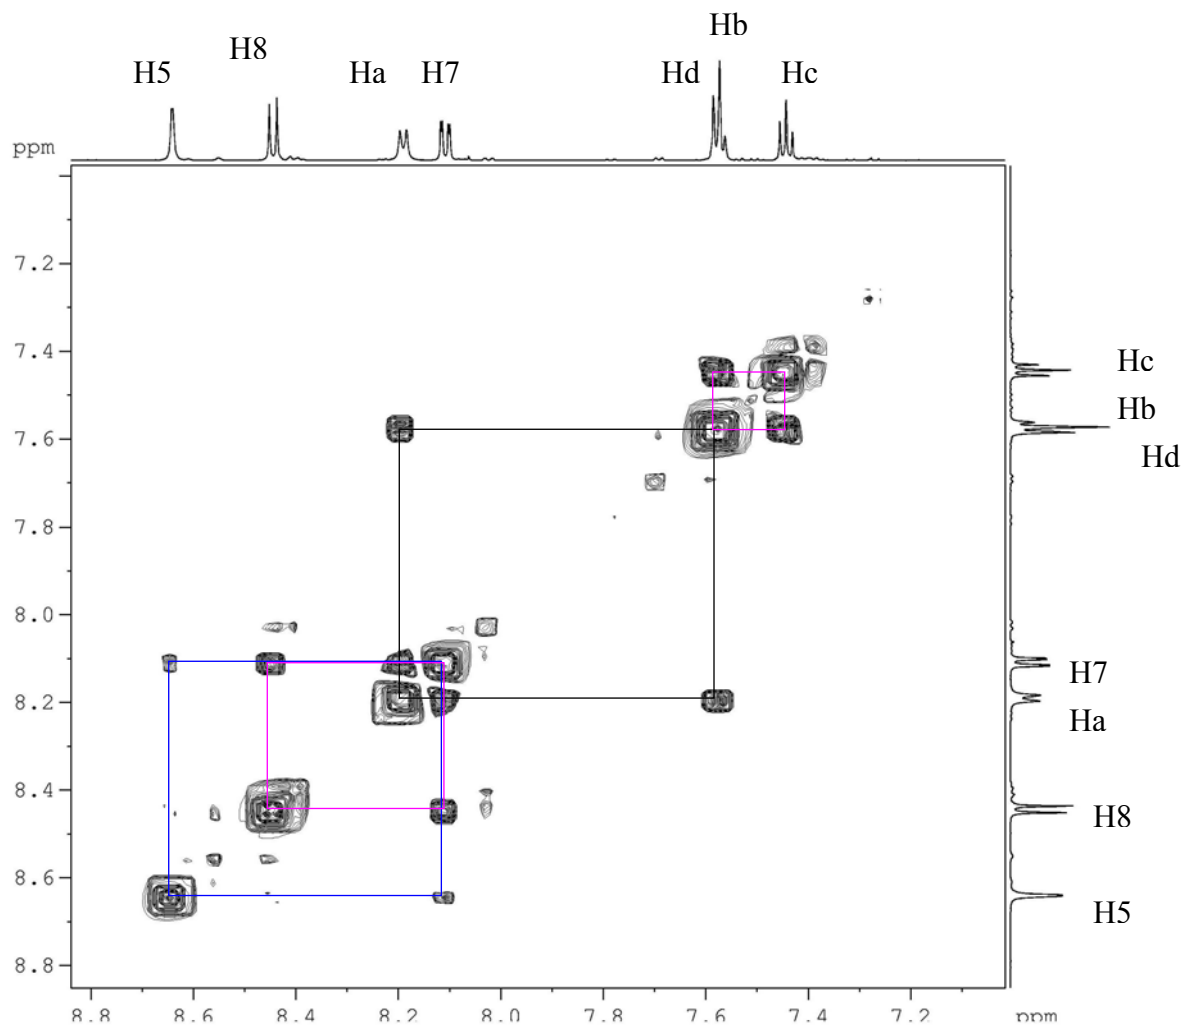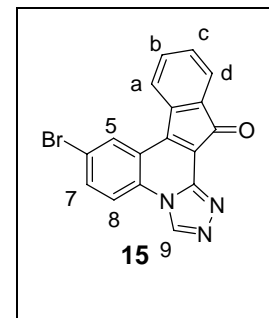



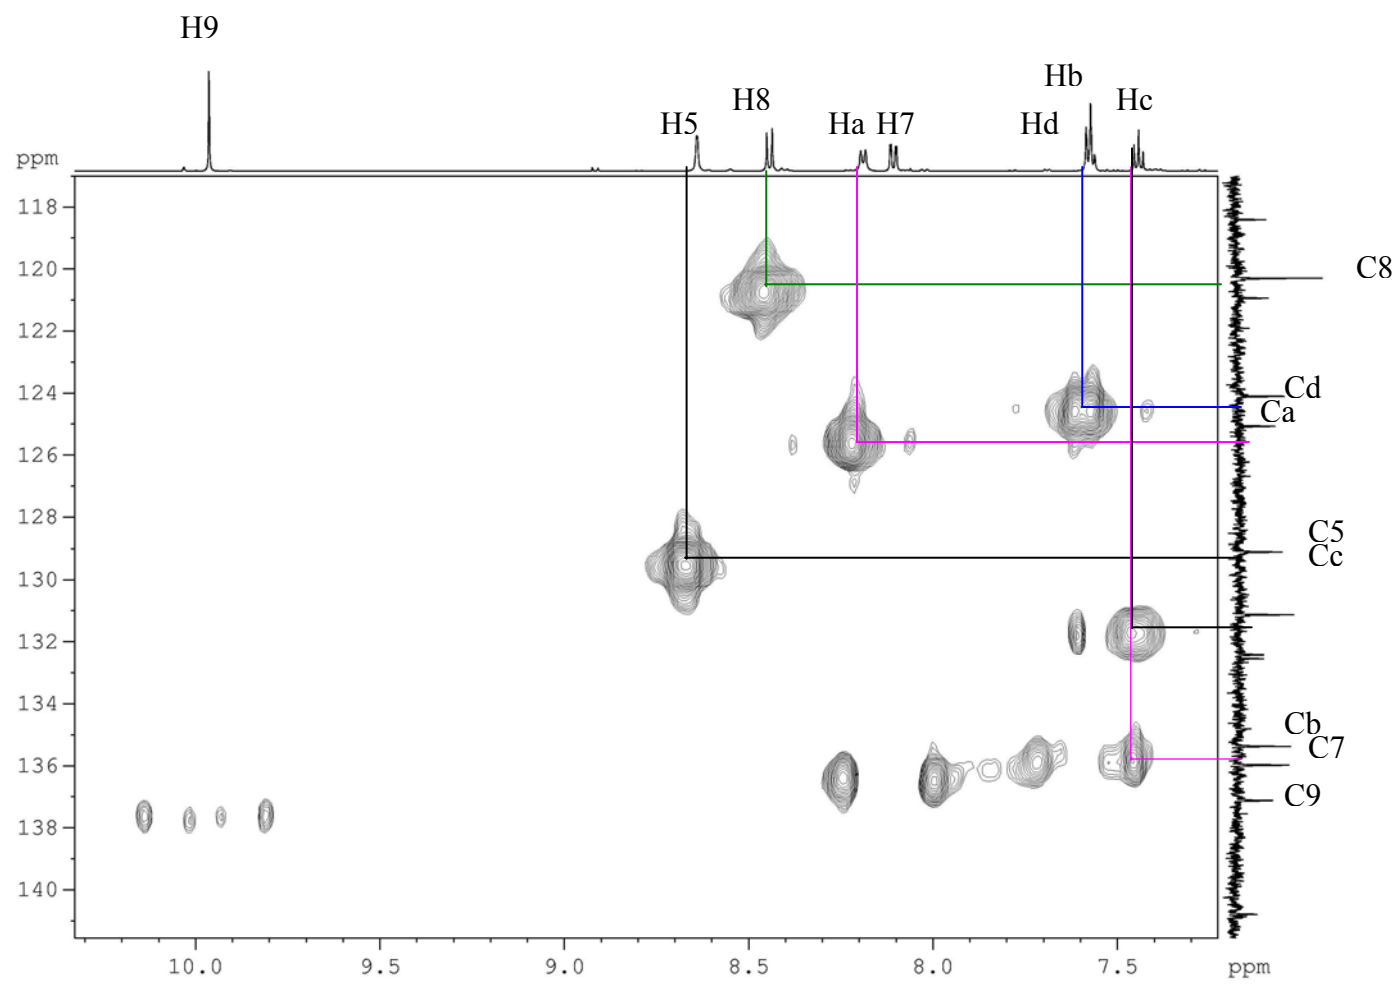

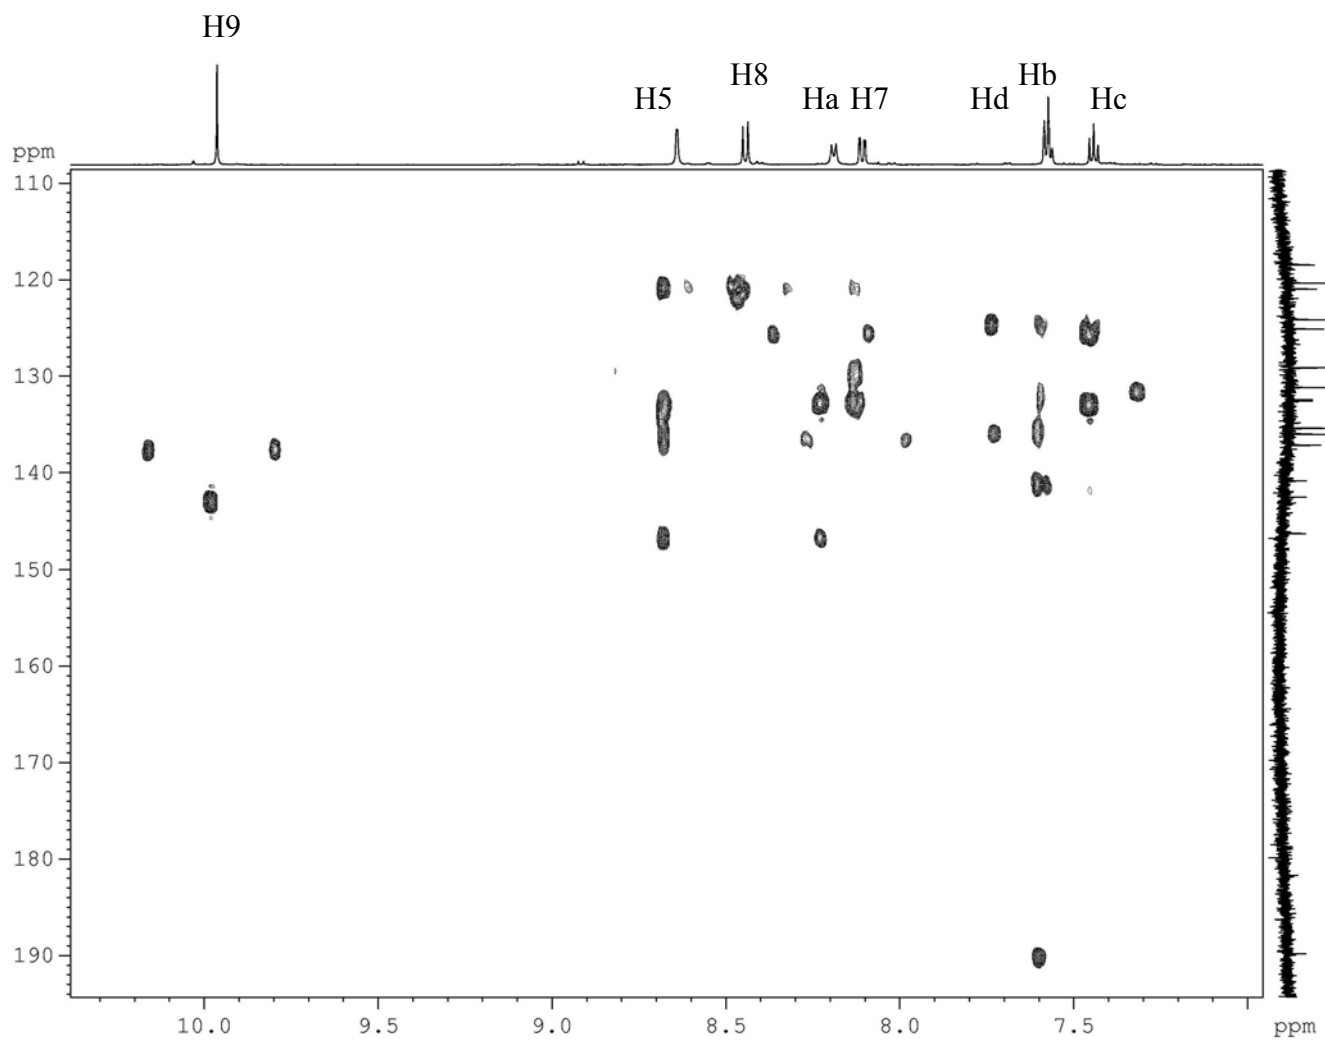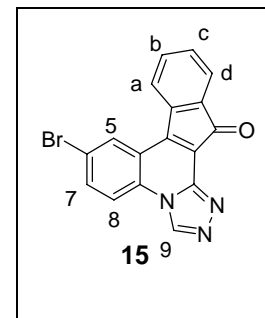

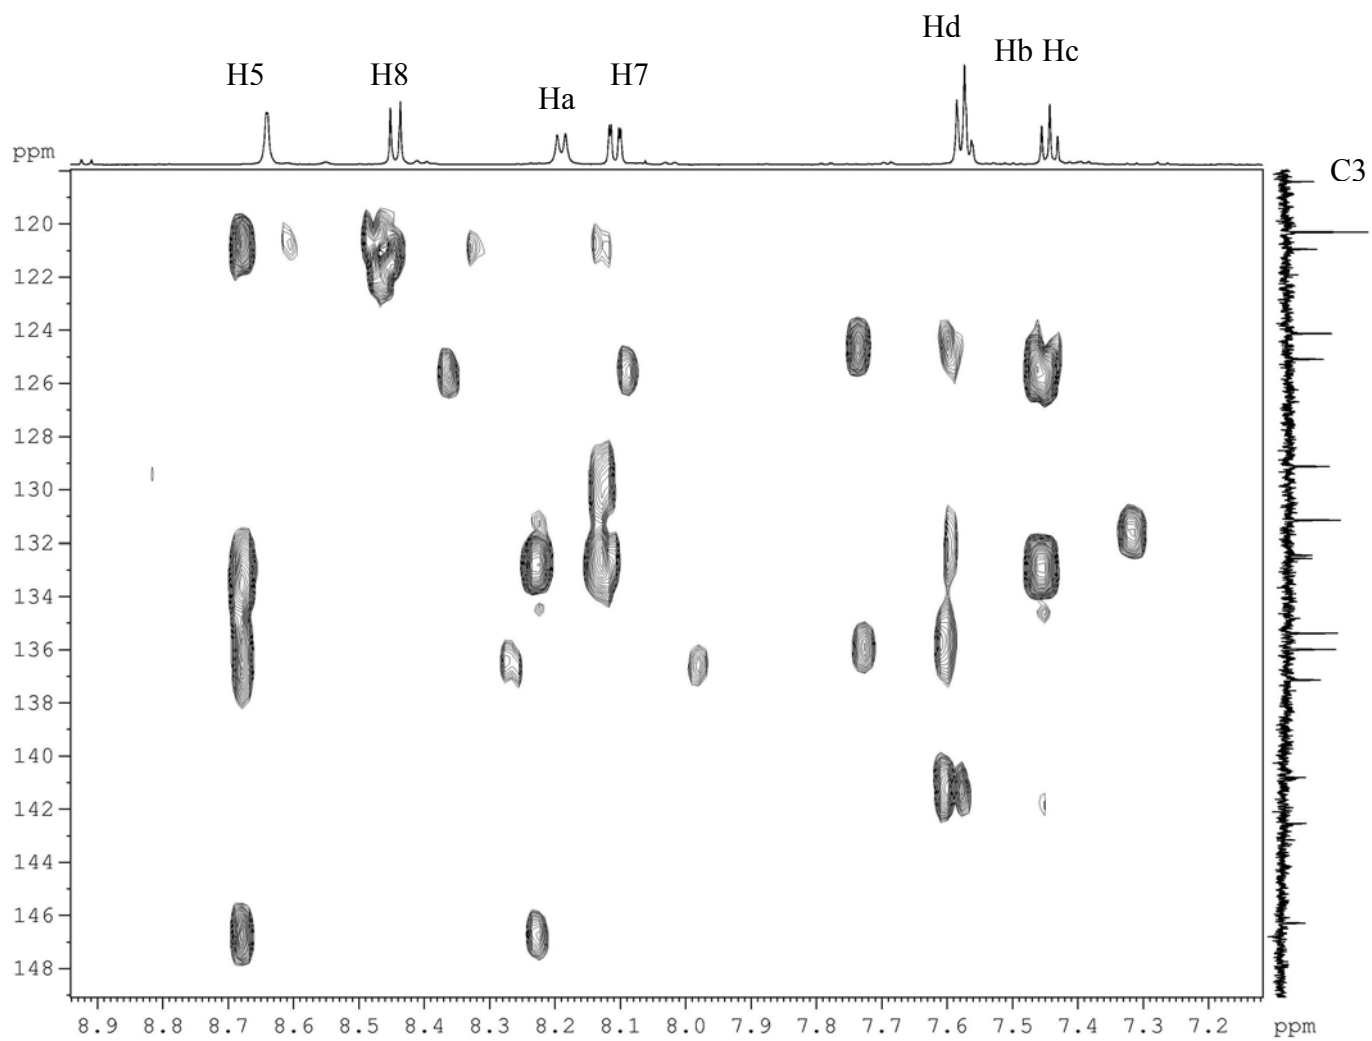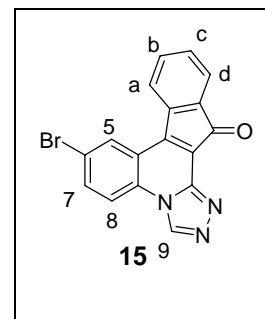

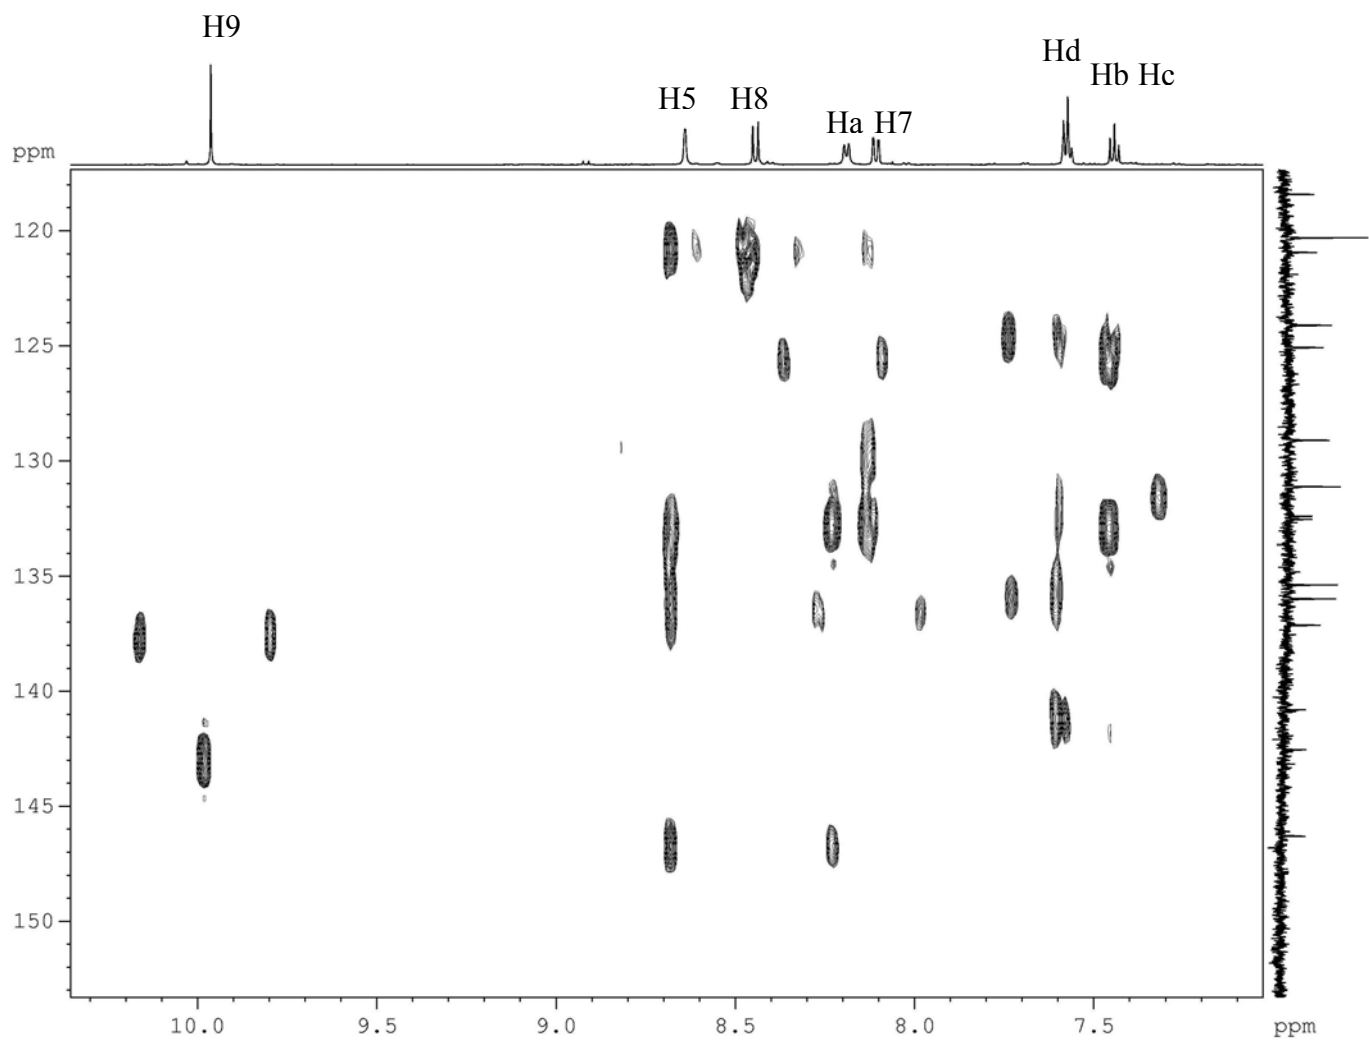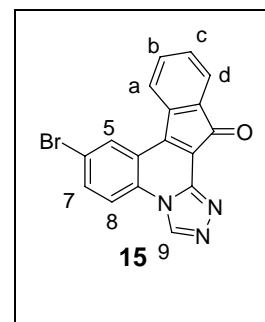

\*

Sample Name: CR080-84-87-87A

INDIA  
Acq. Time: 13:23

Acq. Date: Friday, March 12, 2010

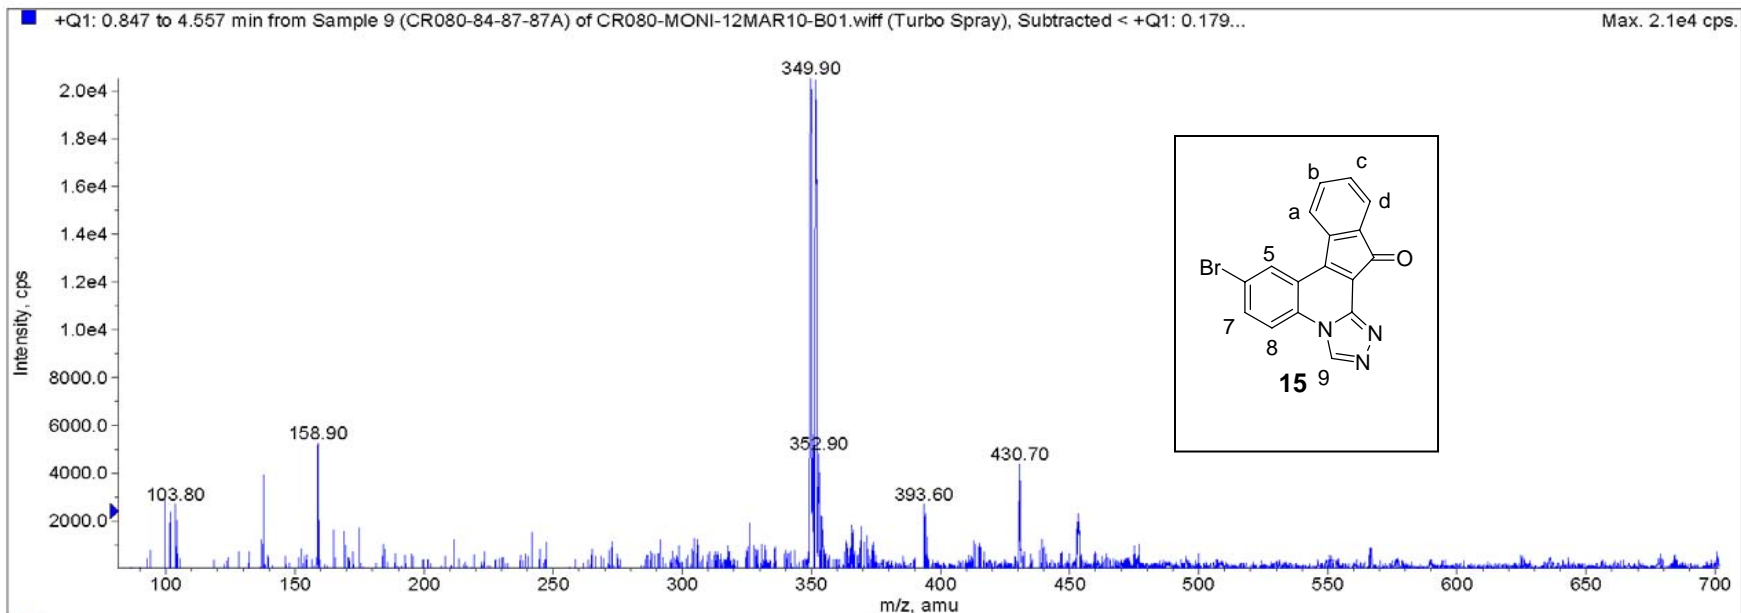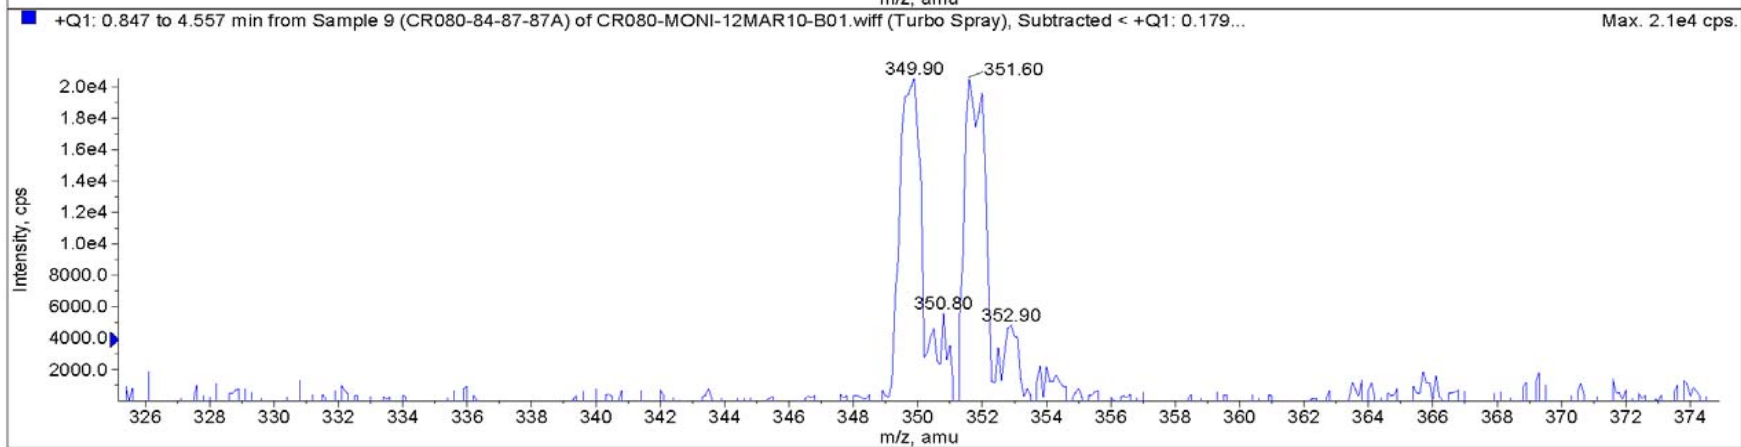

\*Sample Comment: [M+H]

Expected 350

\*\*Analyzed By :

\*\*Checked By :

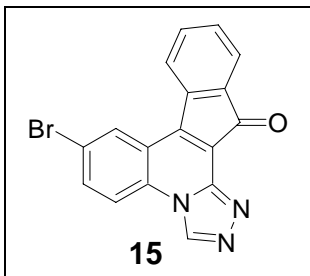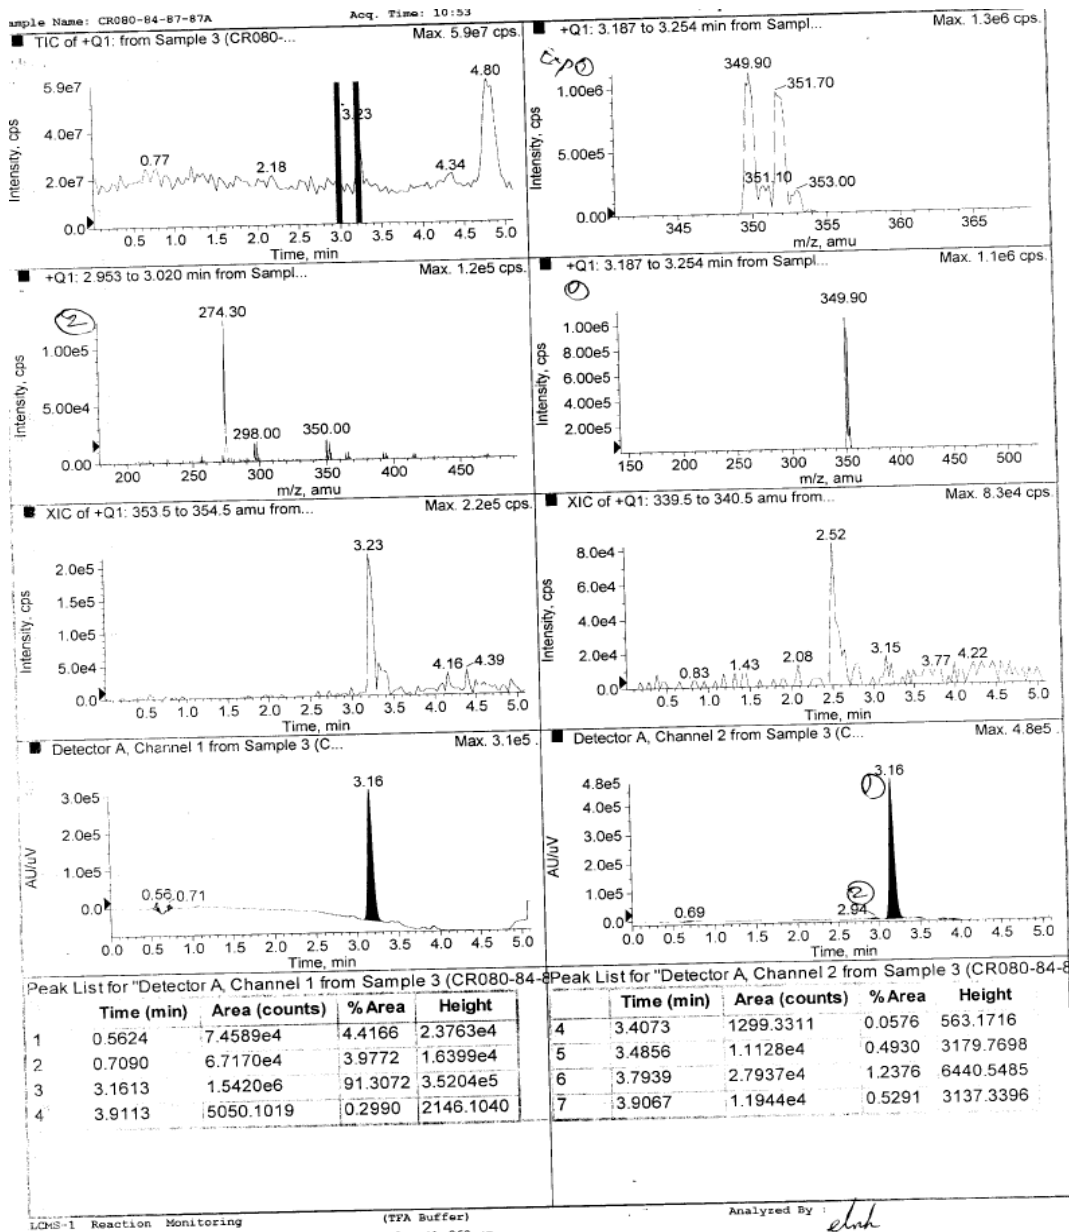

Sample Name : CR080-84-87-87A  
 Sample ID : CR080-84-87-87A  
 Column : Gemini C-18 (50 x 4.6 mm) 5u  
 Vial# : 47  
 Inj. Volume : 6 uL  
 Tray# : 2  
 Acquired by : AVINASH

Data File Name : 05031021.lcd  
 Method File Name : GENERAL-A.lcm  
 Batch File Name : 050310.lcb  
 Data Acquired : 3/5/2010 4:25:22 PM  
 Data Processed : 3/5/2010 4:37:29 PM  
 Ref.No.:NP/A0011/53

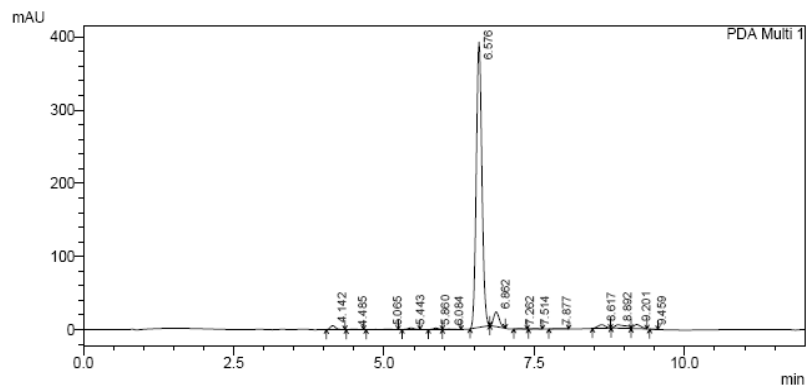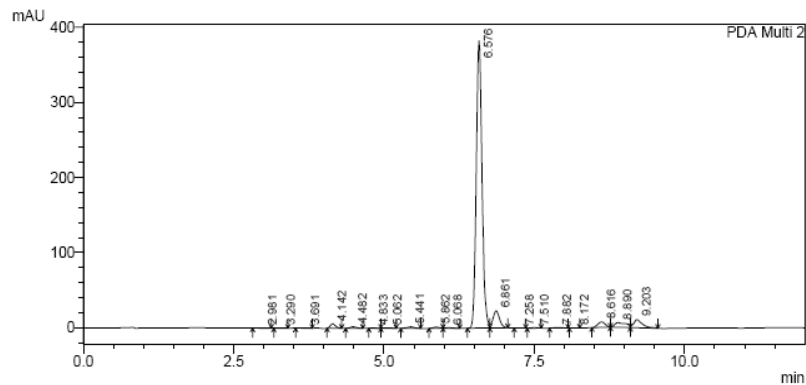

1 PDA Multi 1/263nm 4nm  
 2 PDA Multi 2/244nm 4nm

PeakTable

PDA Ch1 263nm 4nm

| Peak# | Ret. Time | Area    | Area % | Height |
|-------|-----------|---------|--------|--------|
| 1     | 4.14      | 33361   | 1.15   | 5426   |
| 2     | 4.48      | 4262    | 0.15   | 614    |
| 3     | 5.06      | 7544    | 0.26   | 724    |
| 4     | 5.44      | 14605   | 0.50   | 2121   |
| 5     | 5.86      | 12304   | 0.42   | 1806   |
| 6     | 6.08      | 5419    | 0.19   | 522    |
| 7     | 6.58      | 2540919 | 87.23  | 389831 |
| 8     | 6.86      | 129594  | 4.45   | 20022  |
| 9     | 7.26      | 3256    | 0.11   | 467    |
| 10    | 7.51      | 4566    | 0.16   | 736    |
| 11    | 7.88      | 5400    | 0.19   | 488    |
| 12    | 8.62      | 40701   | 1.40   | 4832   |
| 13    | 8.89      | 62481   | 2.14   | 4655   |
| 14    | 9.20      | 47218   | 1.62   | 5628   |
| 15    | 9.46      | 1260    | 0.04   | 303    |
| Total |           | 2912891 | 100.00 | 438174 |

PeakTable

PDA Ch2 244nm 4nm

| Peak# | Ret. Time | Area    | Area % | Height |
|-------|-----------|---------|--------|--------|
| 1     | 2.98      | 3854    | 0.13   | 400    |
| 2     | 3.29      | 3725    | 0.12   | 559    |
| 3     | 3.69      | 4615    | 0.15   | 540    |
| 4     | 4.14      | 34984   | 1.14   | 5862   |
| 5     | 4.48      | 13886   | 0.45   | 2049   |
| 6     | 4.83      | 1148    | 0.04   | 209    |
| 7     | 5.06      | 3400    | 0.11   | 562    |
| 8     | 5.44      | 14494   | 0.47   | 1971   |
| 9     | 5.86      | 9514    | 0.31   | 1569   |
| 10    | 6.07      | 3930    | 0.13   | 509    |
| 11    | 6.58      | 2538376 | 82.62  | 382074 |
| 12    | 6.86      | 170149  | 5.54   | 22795  |
| 13    | 7.26      | 2798    | 0.09   | 439    |
| 14    | 7.51      | 4984    | 0.16   | 779    |
| 15    | 7.88      | 6869    | 0.22   | 700    |
| 16    | 8.17      | 675     | 0.02   | 128    |
| 17    | 8.62      | 60921   | 1.98   | 7162   |
| 18    | 8.89      | 84746   | 2.76   | 6218   |
| 19    | 9.20      | 109320  | 3.56   | 10869  |
| Total |           | 3072388 | 100.00 | 445395 |

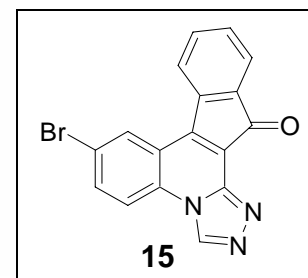

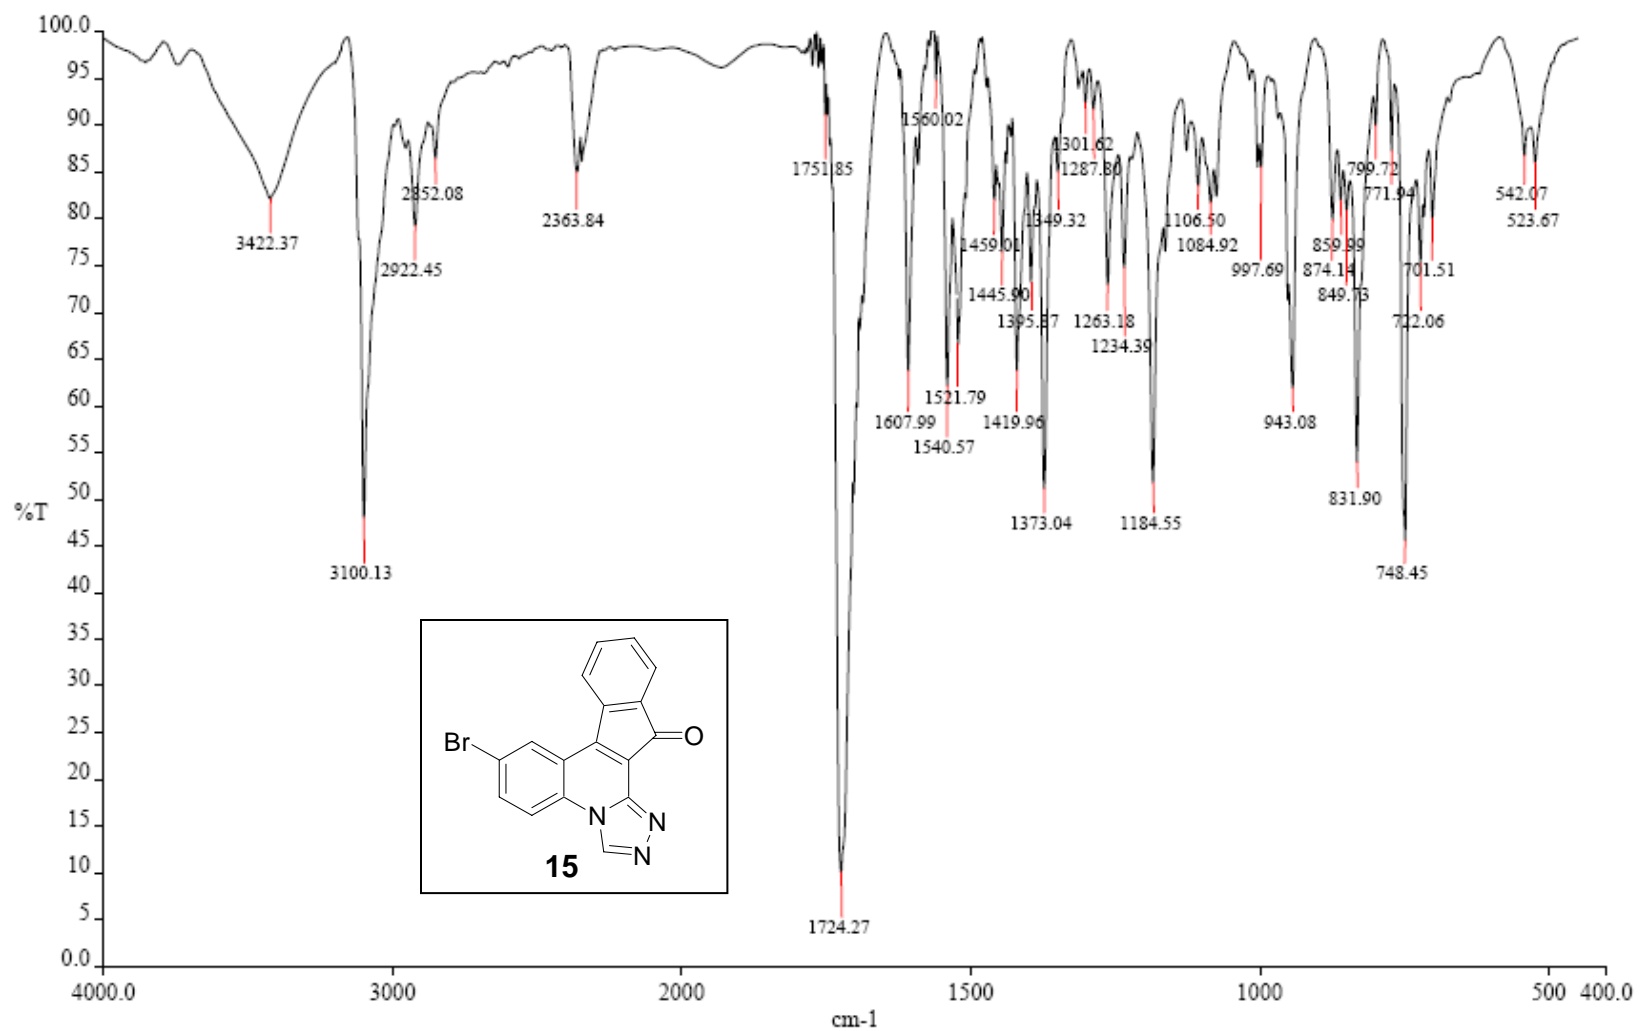

Spectrum Name: CR080-84-87-87A.sp

Analyst: GANESH

Accumulations: 16

Time: 4:42:44 PM

Description: CR080-84-87-87A IN KBr

Resolution: 4.00 cm-1

Date: 2/5/2010



Current Data Parameters  
 NAME CR080-96-33-19B  
 EXPNO 1  
 PROCNO 1

F2 - Acquisition Parameters  
 Date\_ 20100206  
 Time 10.23  
 INSTRUM spect  
 PROBHD 5 mm DUL 13C-1  
 PULPROG zg30  
 TD 32768  
 SOLVENT CDC13  
 NS 8  
 DS 0  
 SWH 8278.146 Hz  
 FIDRES 0.252629 Hz  
 AQ 1.9792372 sec  
 RG 287.4  
 DW 60.400 usec  
 DE 6.00 usec  
 TE 293.0 K  
 D1 3.00000000 sec  
 TD0 1

===== CHANNEL f1 =====  
 NUC1 1H  
 P1 12.50 usec  
 PL1 -1.00 dB  
 SFO1 400.1324710 MHz

F2 - Processing parameters  
 SI 16384  
 SF 400.129886 MHz  
 WDW EM  
 SSB 0  
 LB 1.00 Hz  
 GB 0  
 PC 0.50

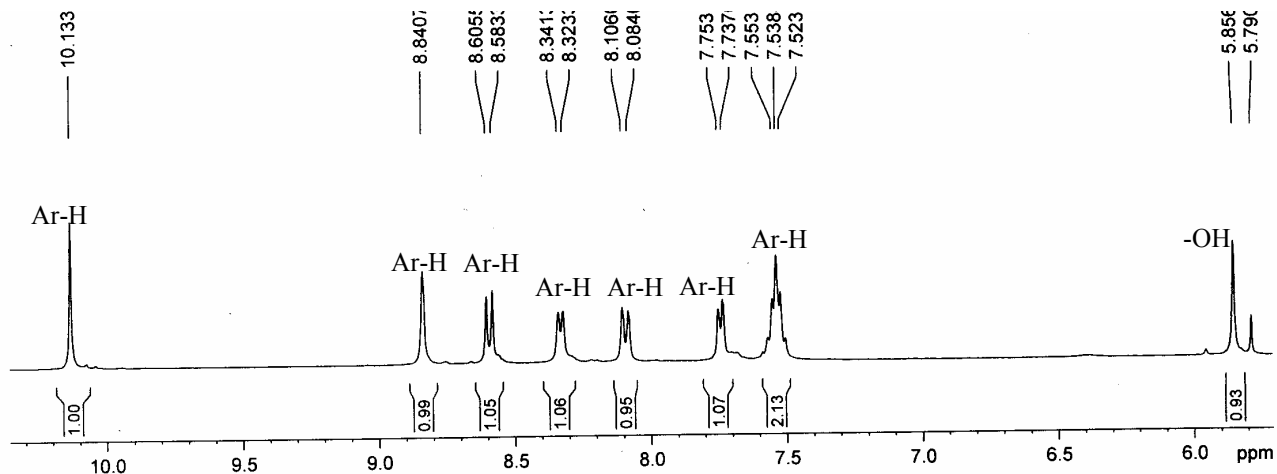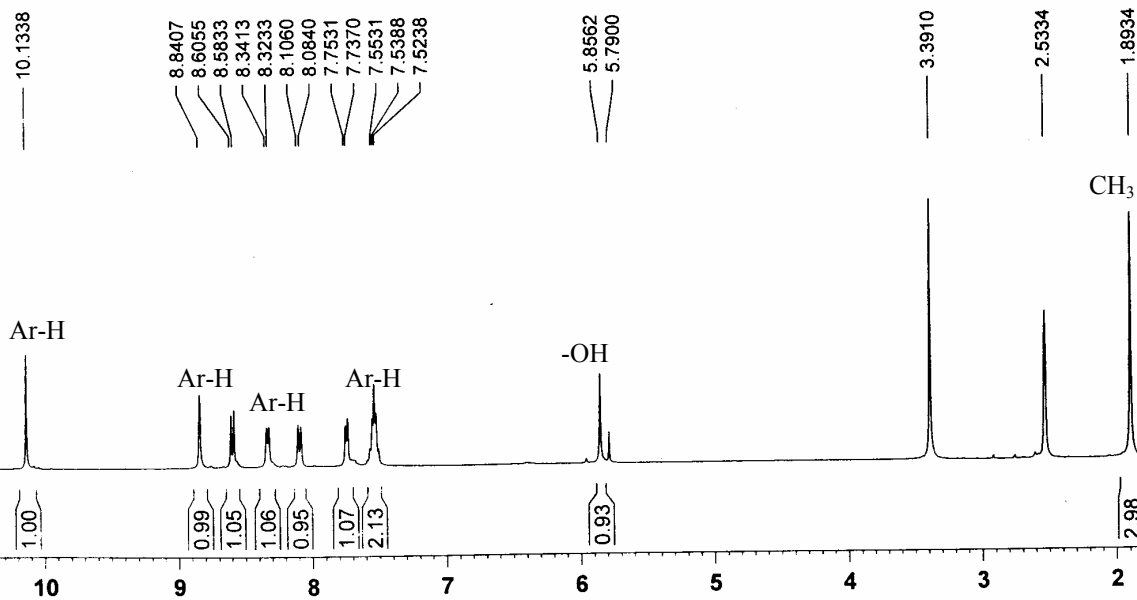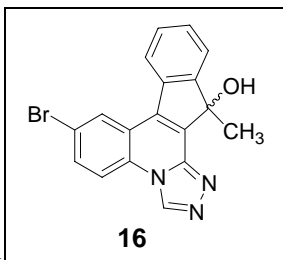

Current Data Parameters  
 NAME CR080-86-33-19B  
 EXPNO 2  
 PROCNO 1

F2 - Acquisition Parameters  
 Date\_ 20100320  
 Time 11.58  
 INSTRUM spect  
 PROBHD 5 mm DUL 13C-1  
 PULPROG zg30  
 TD 32788  
 SOLVENT DMSO  
 NS 16  
 DS 0  
 SWH 8278.146 Hz  
 FIDRES 0.252828 Hz  
 AQ 1.9792372 sec  
 RG 466.1  
 DW 60.400 usec  
 DE 6.00 usec  
 TE 295.6 K  
 D1 3.00000000 sec  
 TDO 1

===== CHANNEL f1 =====  
 NUC1 1H  
 P1 12.50 usec  
 PL1 -1.00 dB  
 SFO1 400.1324710 MHz

F2 - Processing parameters  
 SI 16384  
 SF 400.1300021 MHz  
 WDW EM  
 SSB 0  
 LB 0.30 Hz  
 GB 0  
 PC 0.50

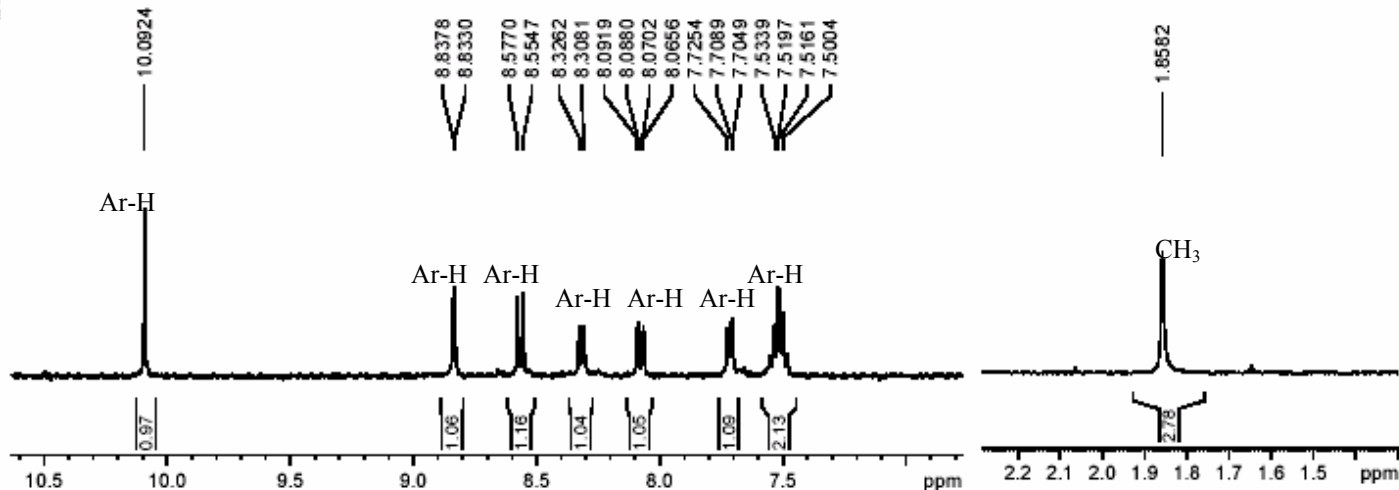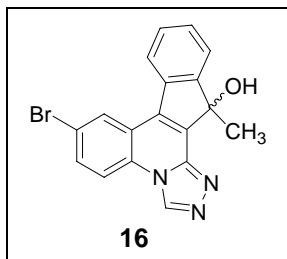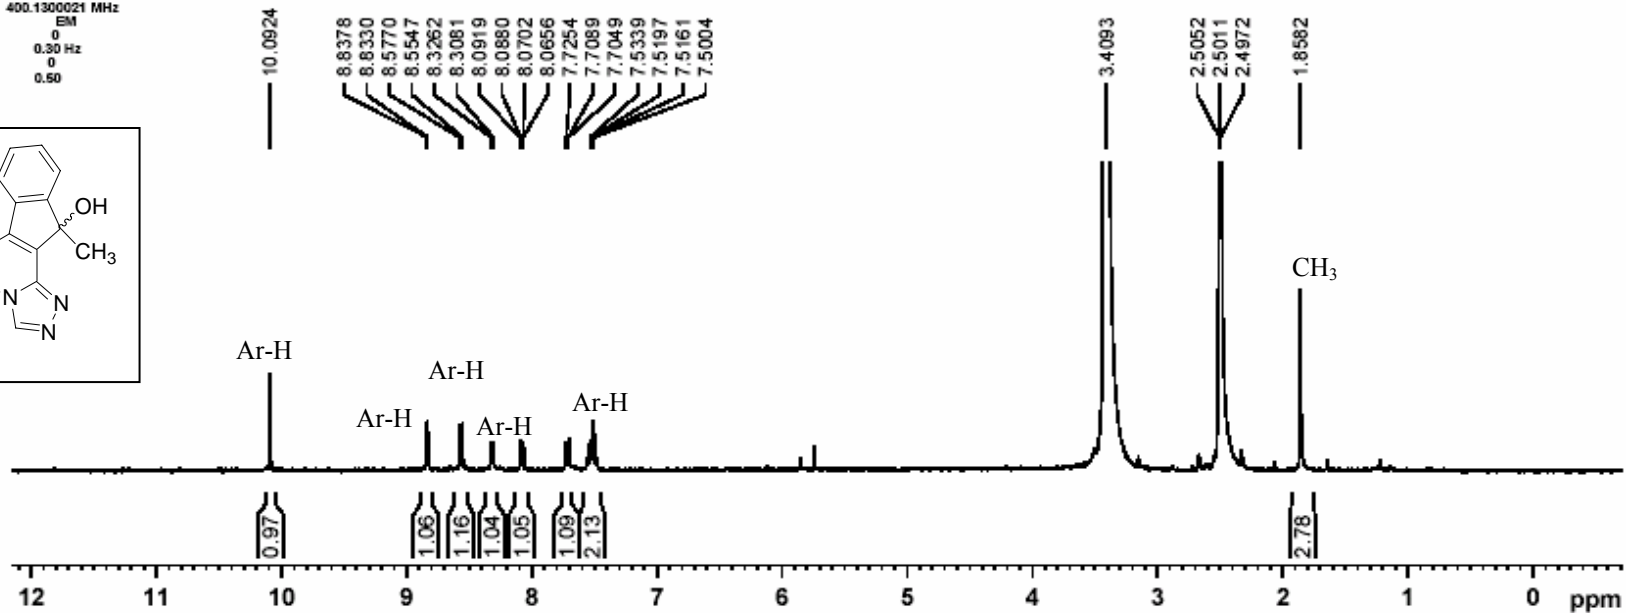

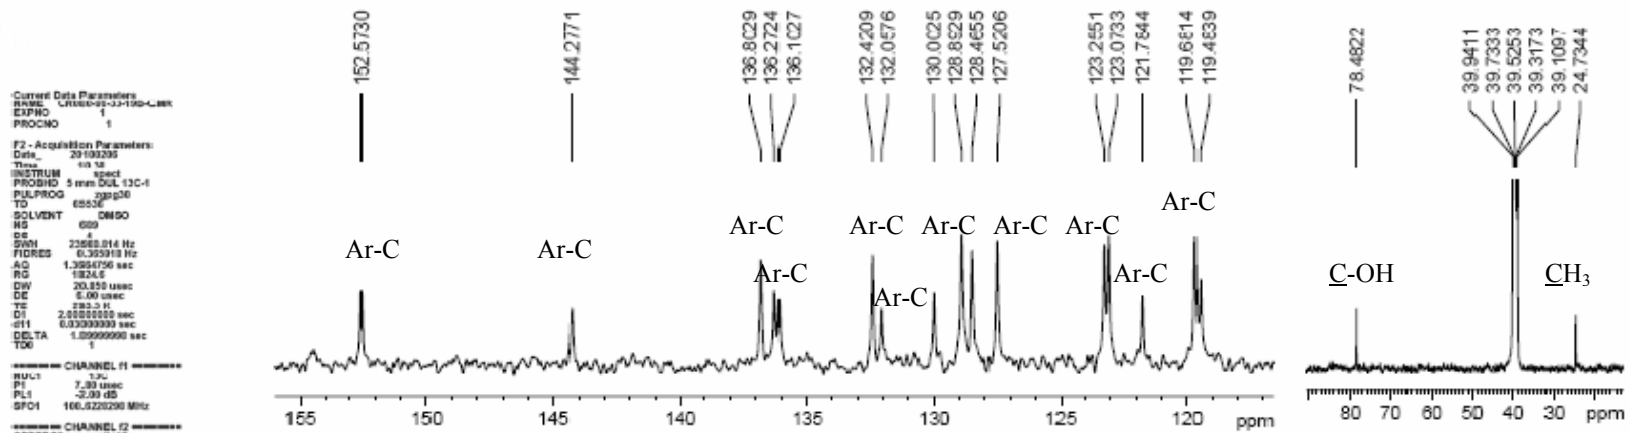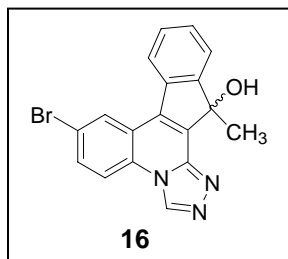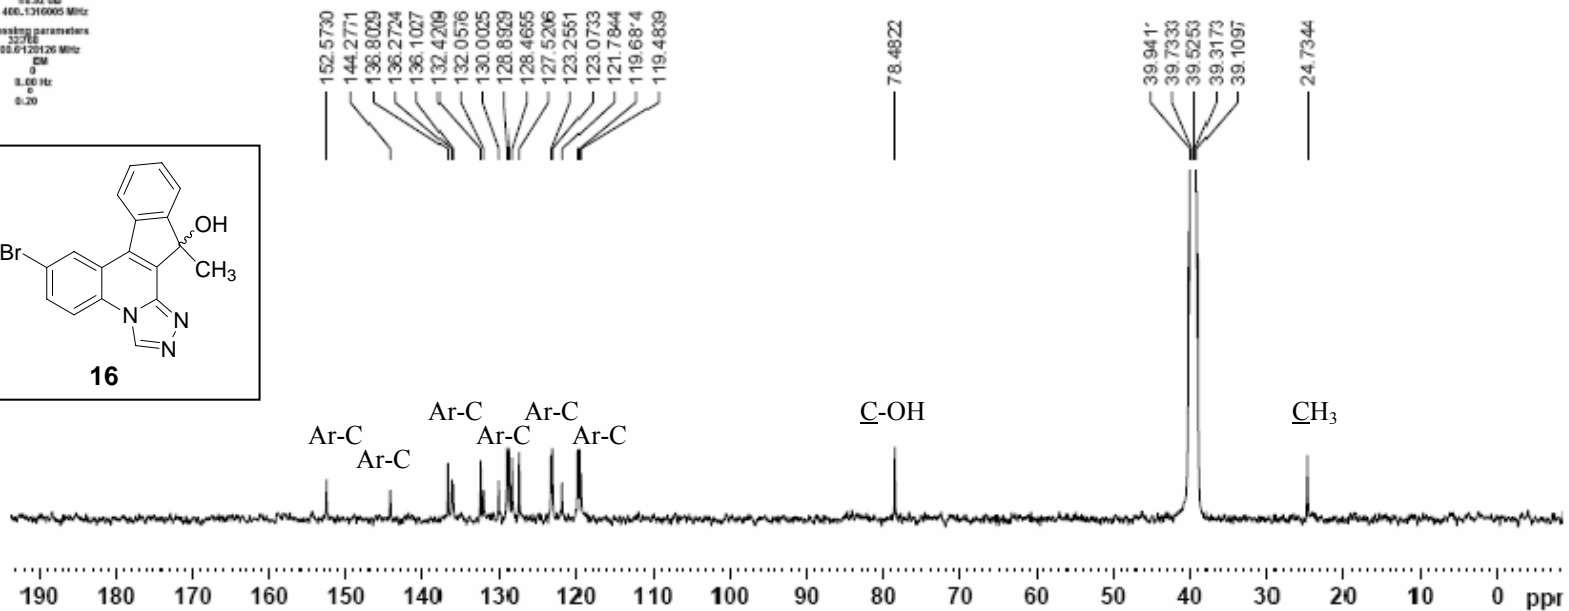

\*

Sample Name: CR080-96-33-19B

INDIA  
Acq. Time: 18:38

Acq. Date: Wednesday, November 11, 2009

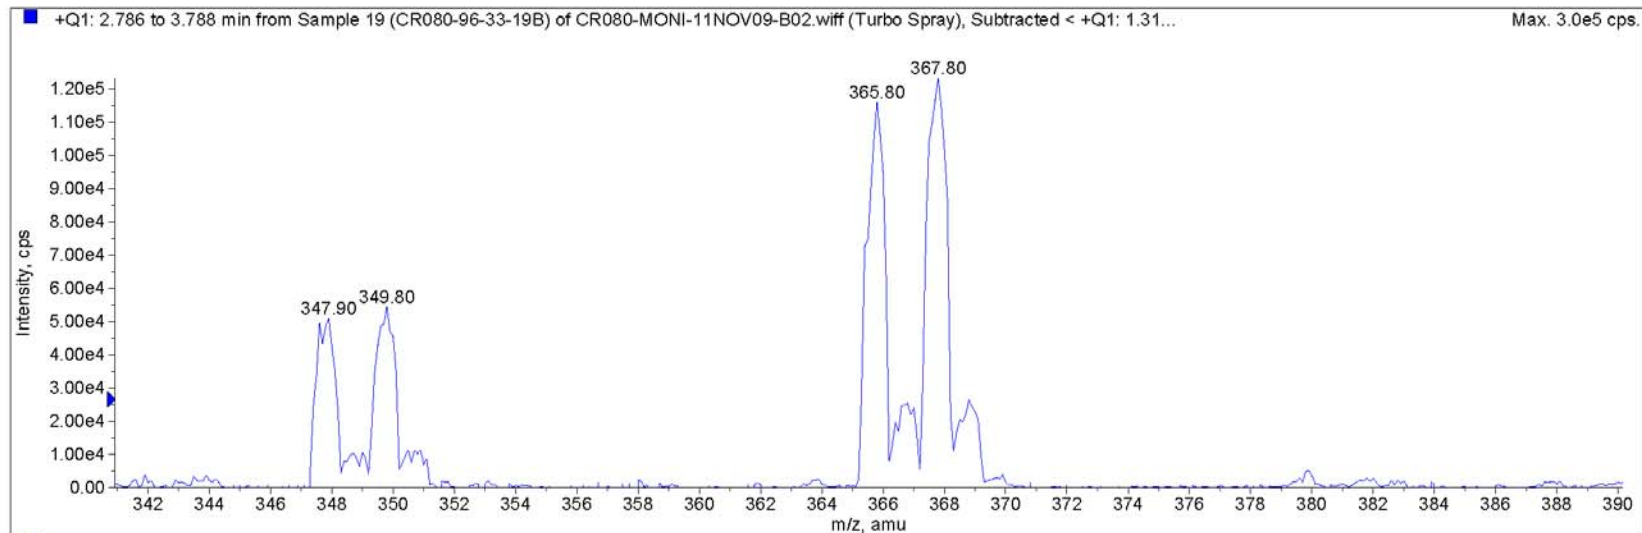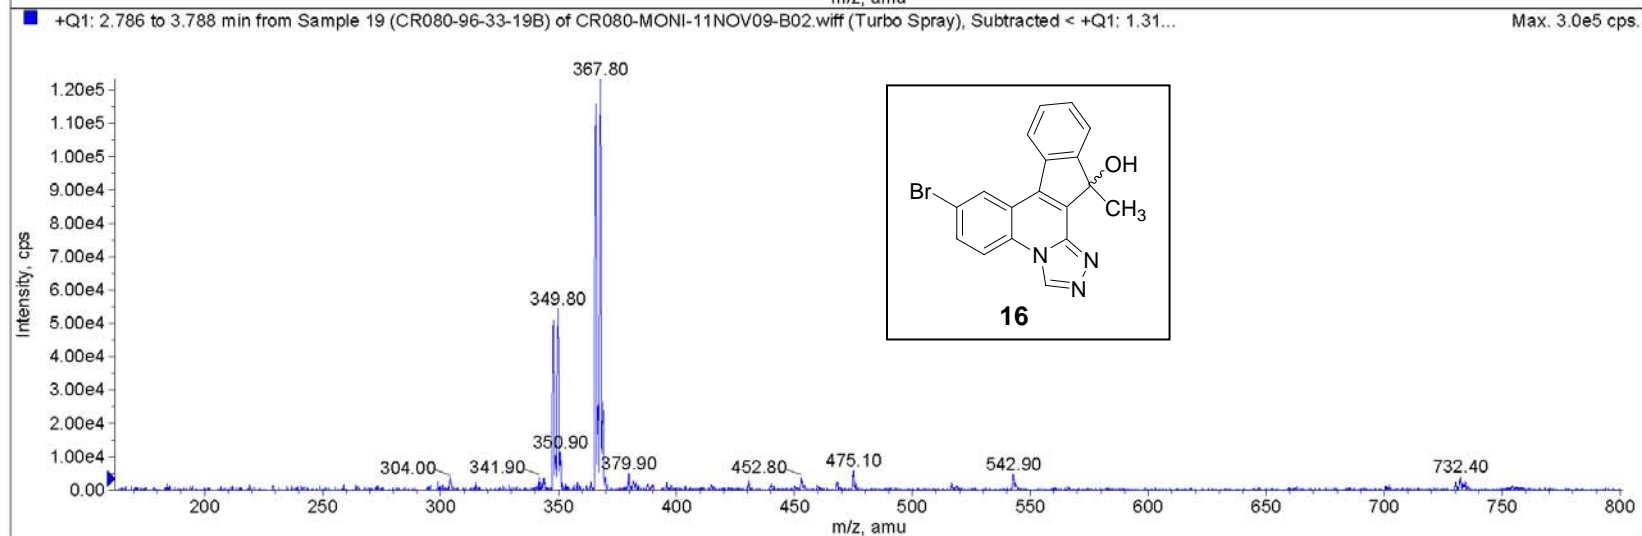

\*Sample Comment: [M+H]<sup>+</sup> 366

Expected

\*\*Analyzed By :

\*\*Checked By :

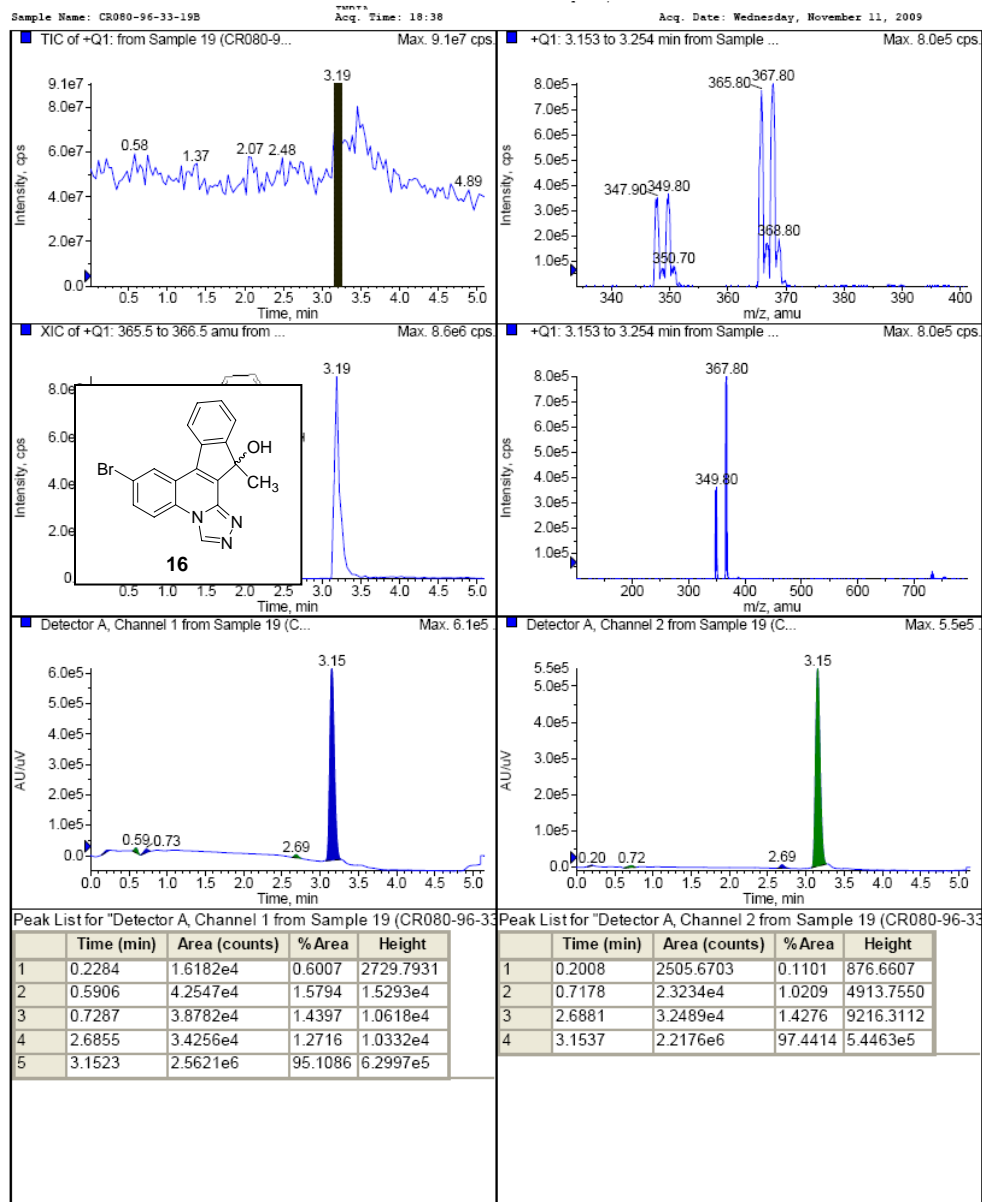

=====>  
 SAMPLE: CR080-96-33-19 B  
 Column: GEMINI-C18 (250X4.6)mm 5µ  
 Injection date : Mon, 8. Mar. 2010 Location : Vial 11  
 Sample Name : CR080-96-33-19 B Inj. No. : 1  
 Acq Operator : GANESH Z Inj. Vol. : 20 µl  
 Analysis Method : C:\CHEM32\2\METHODS\UPLC\_GENERAL\_GRAD\_2\_3.M  
 Last Changed : Mon, 8. Mar. 2010,  
 Acq. Method : C:\Chem32\2\DATA\MAR-10\080310E 2010-03-08 17-23-59\  
 UPLC\_GENERAL\_GRAD\_2\_3.M  
 Method ref : NP/A0011/58

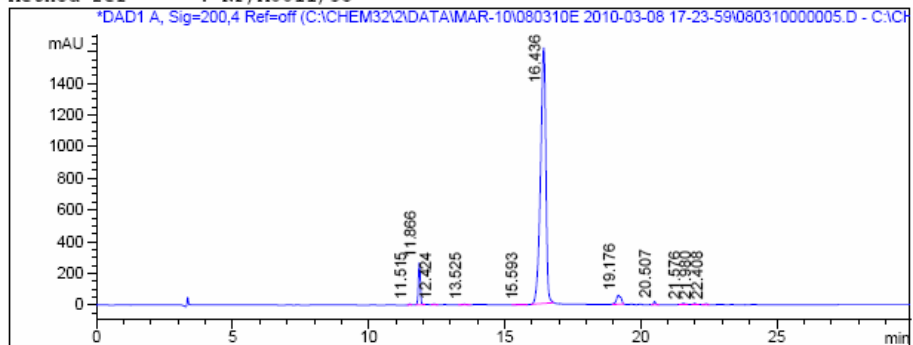

DAD1 A, Sig=200,4 Ref=off

| Peak # | RT (Min) | Width (Min) | Area    | Area % |
|--------|----------|-------------|---------|--------|
| 1      | 11.515   | 0.067       | 26.724  | 0.110  |
| 2      | 11.866   | 0.085       | 1.355e3 | 5.564  |
| 3      | 12.424   | 0.116       | 30.074  | 0.123  |
| 4      | 13.525   | 0.191       | 40.173  | 0.165  |
| 5      | 15.593   | 0.254       | 33.581  | 0.138  |
| 6      | 16.436   | 0.226       | 2.193e4 | 90.047 |
| 7      | 19.176   | 0.200       | 679.650 | 2.790  |
| 8      | 20.507   | 0.088       | 110.934 | 0.455  |
| 9      | 21.576   | 0.120       | 61.662  | 0.253  |
| 10     | 21.980   | 0.092       | 48.290  | 0.198  |
| 11     | 22.408   | 0.091       | 38.001  | 0.156  |

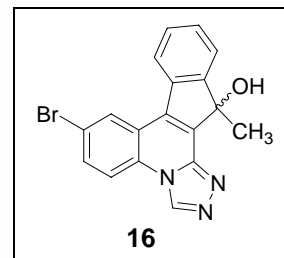

\*\*\* End of Report\*\*\*

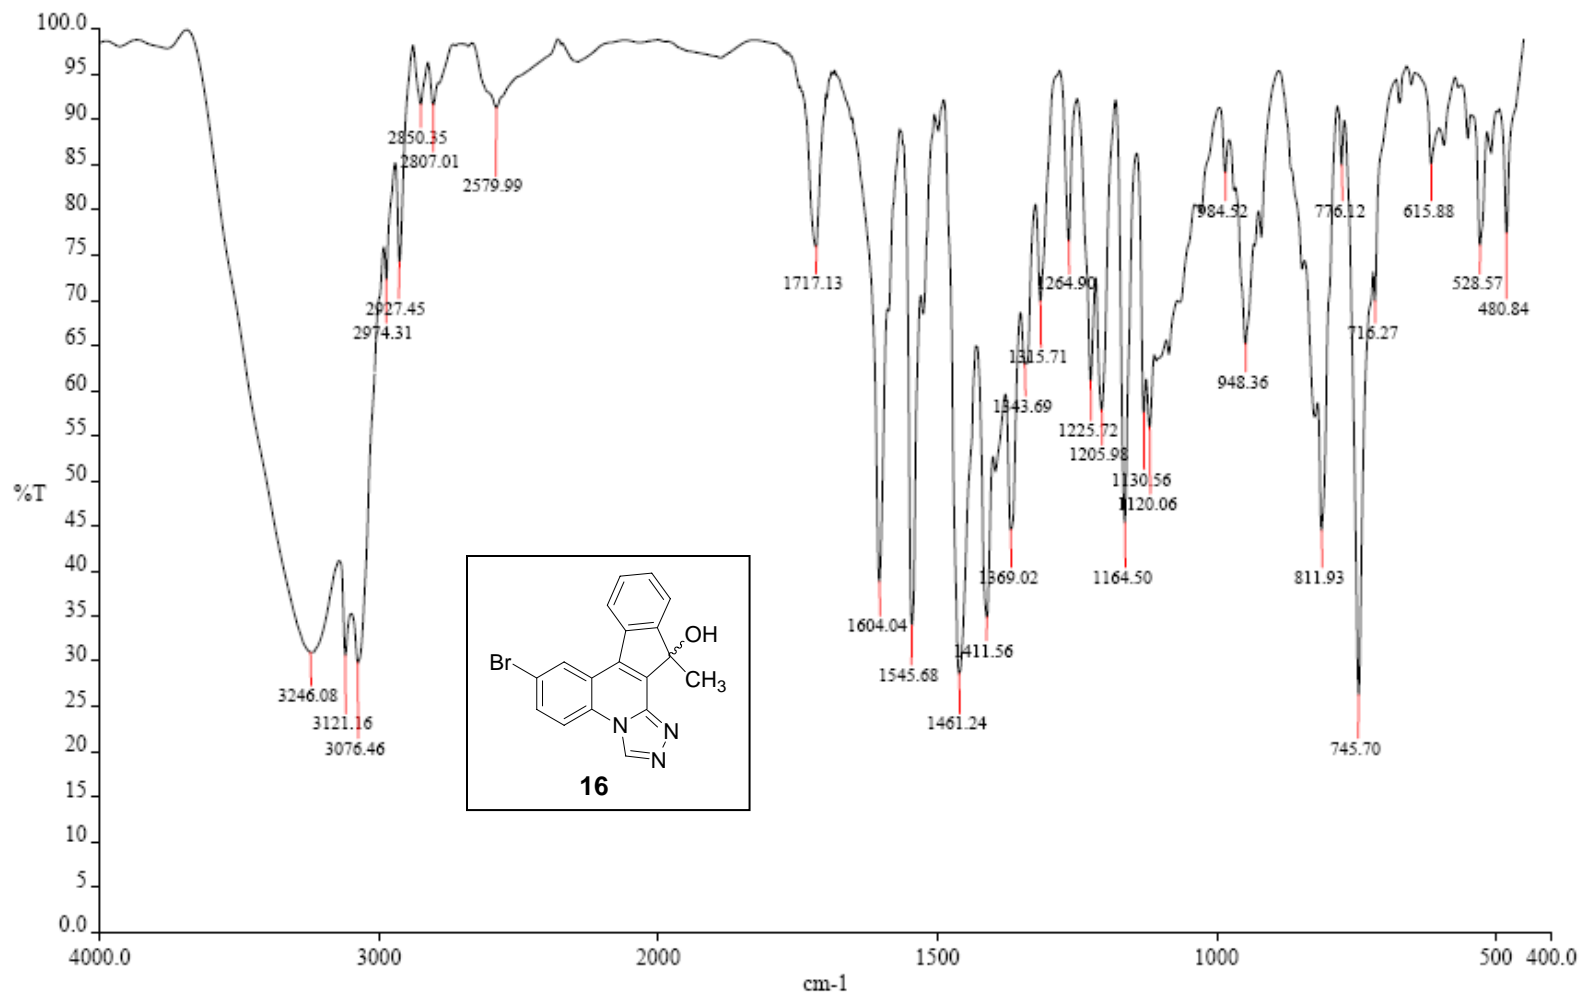

Spectrum Name: CR080-96-33-19B.sp

Analyst: GANESH

Accumulations: 16

Time: 10:40:37 AM

Description: CR080-96-33-19B IN KBr

Resolution: 4.00 cm<sup>-1</sup>

Date: 2/10/2010

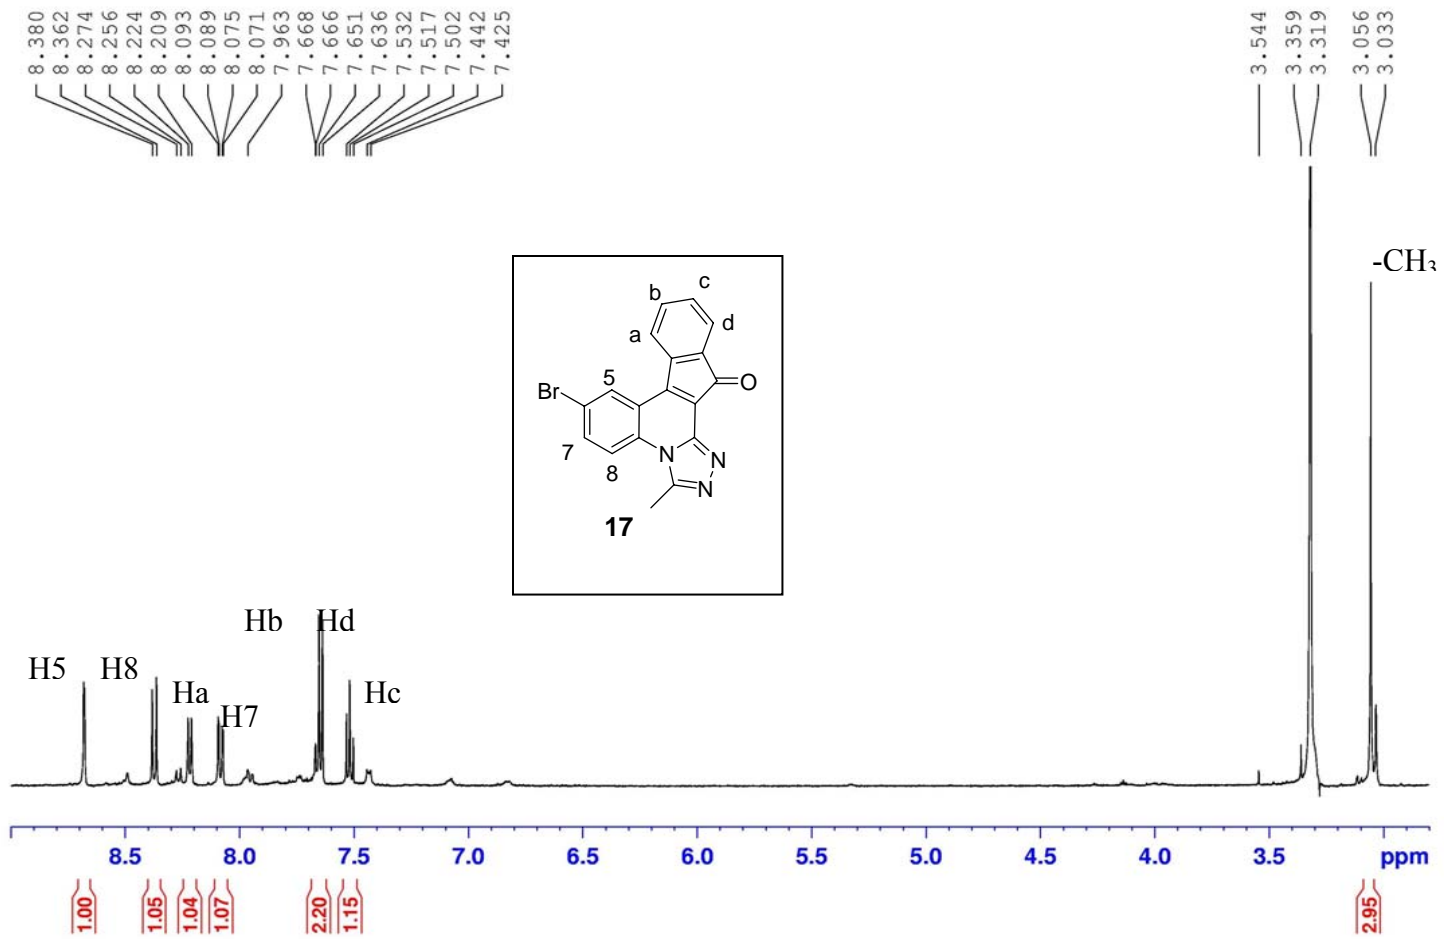



8.681  
8.677

8.380  
8.362

8.274  
8.256  
8.224  
8.209

8.093  
8.089  
8.075  
8.071

7.963

7.668  
7.666  
7.651  
7.636

7.532  
7.517  
7.502

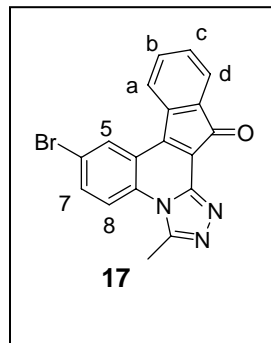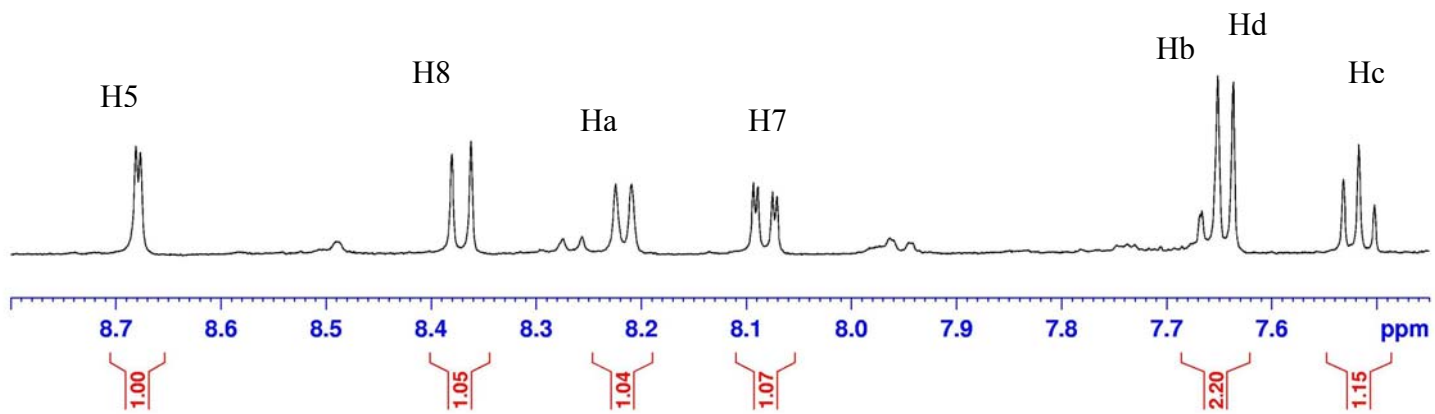

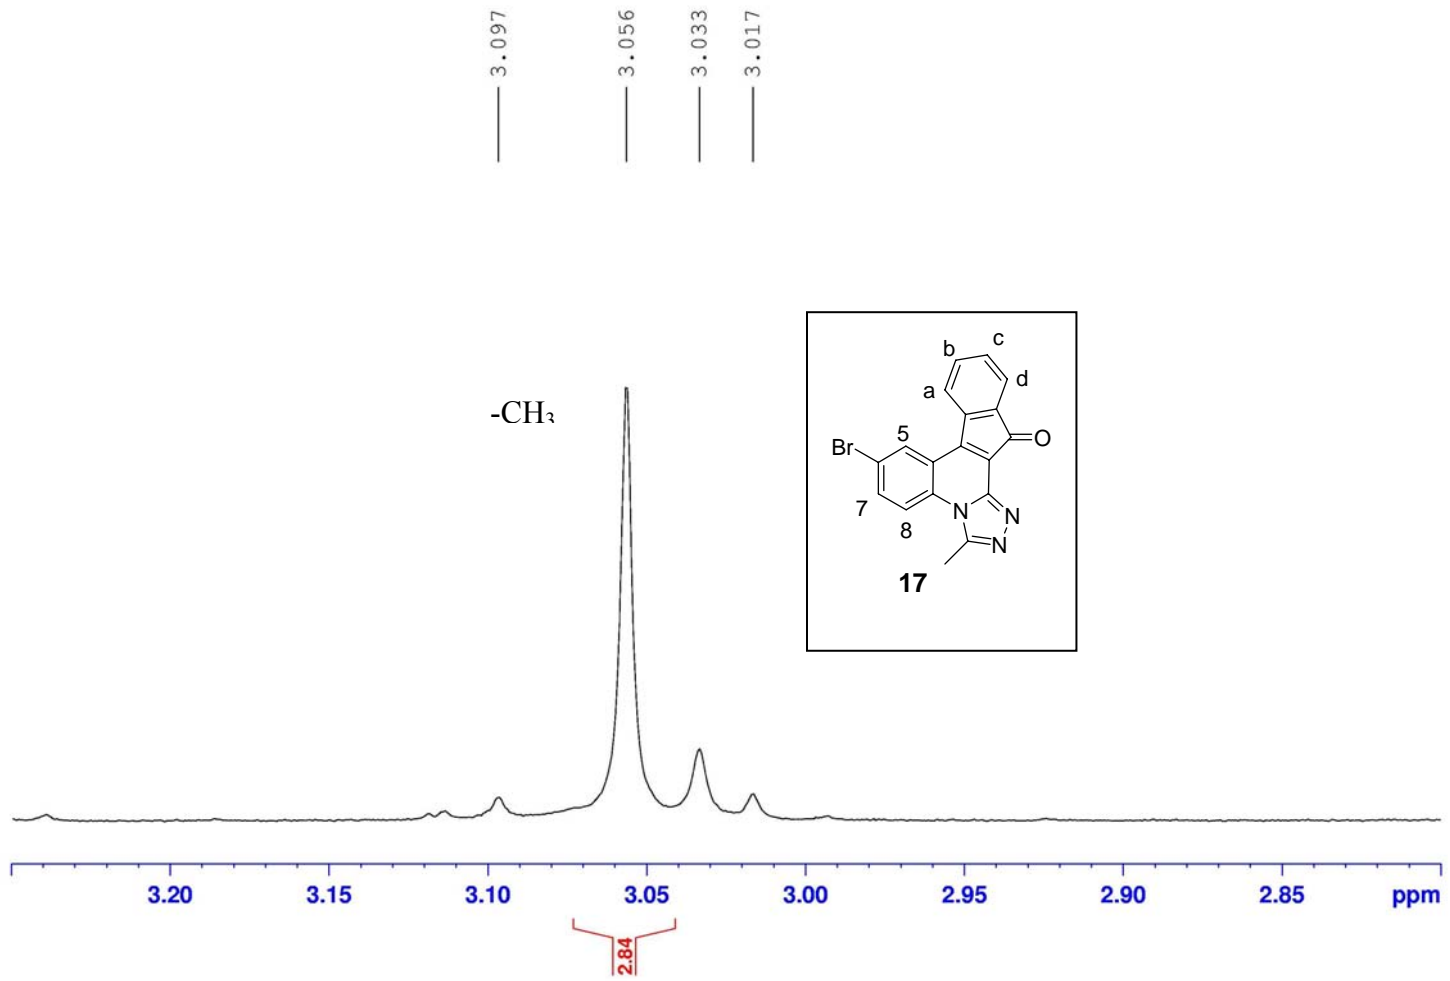

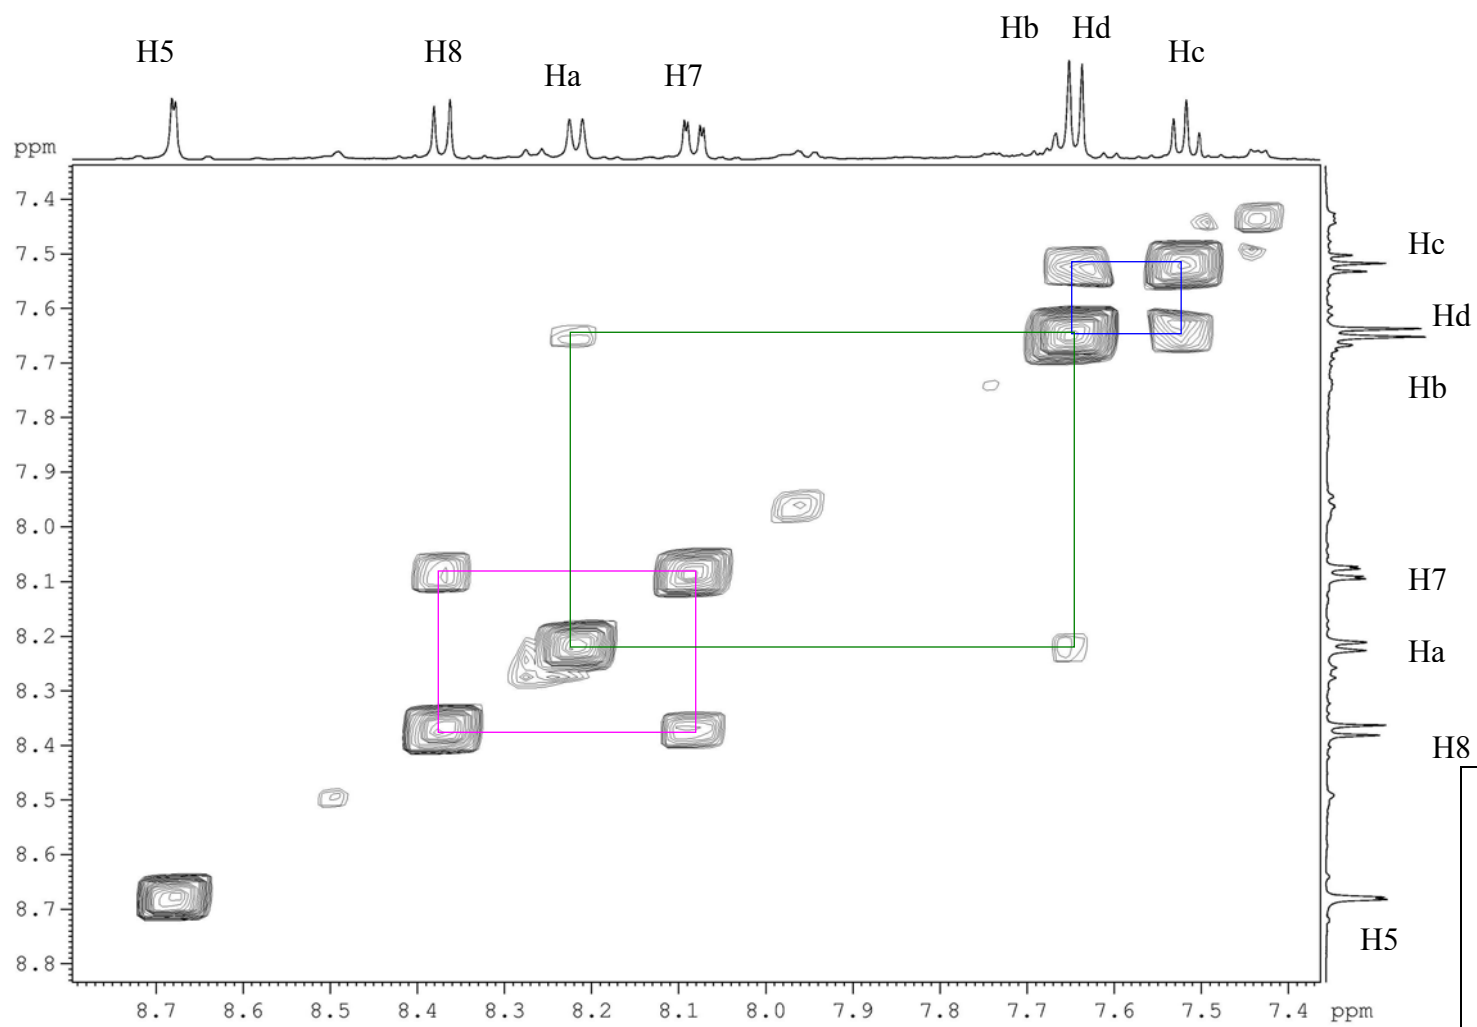

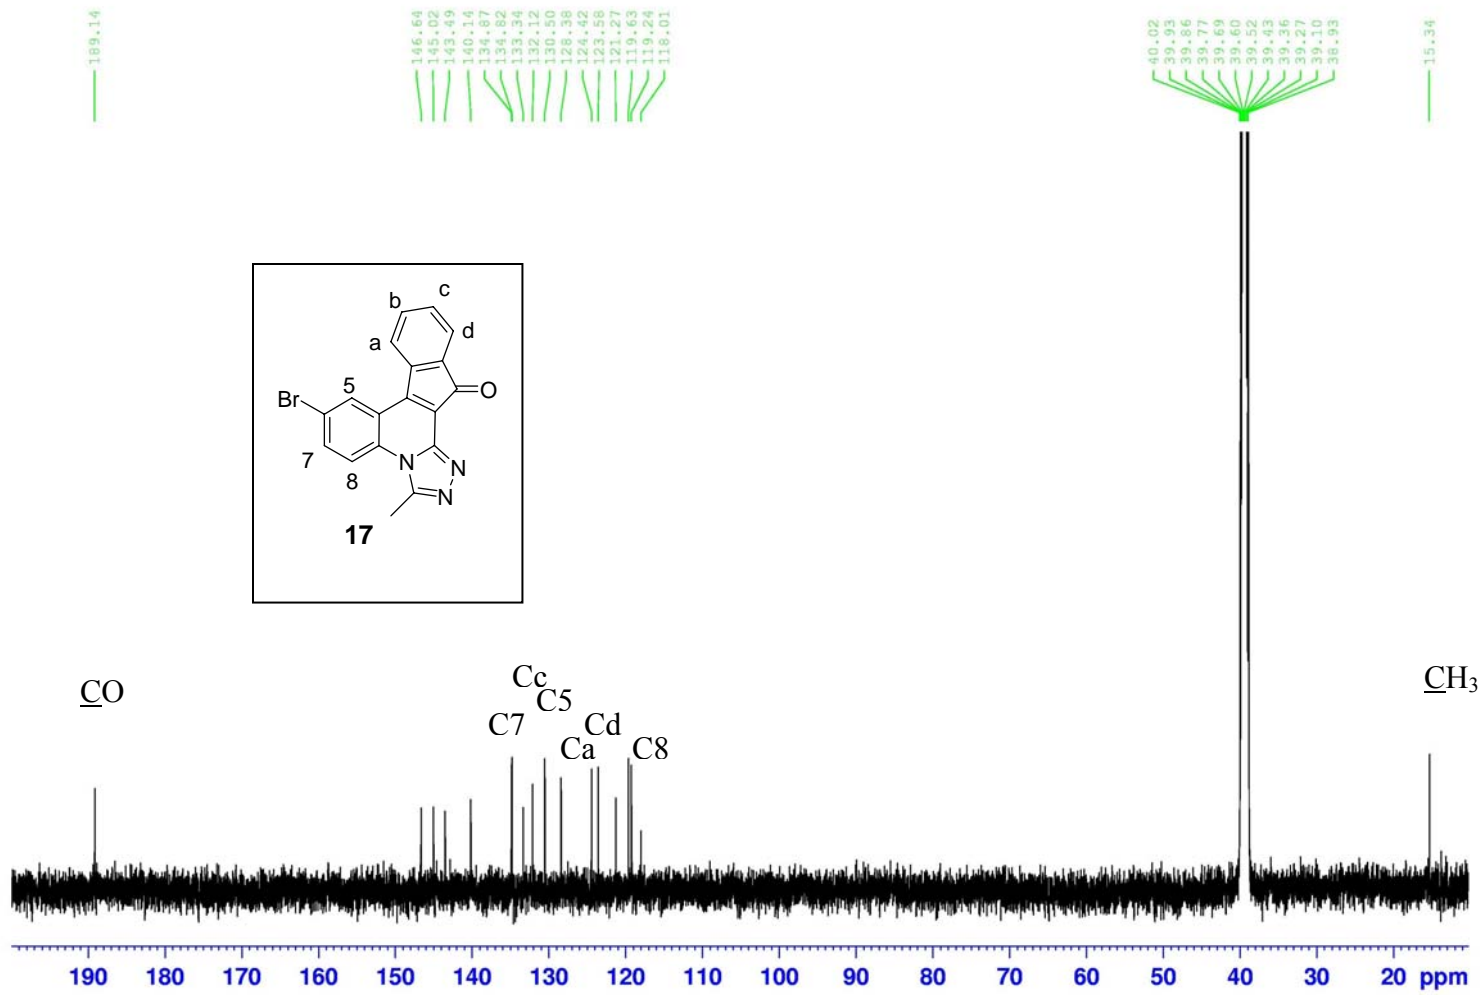

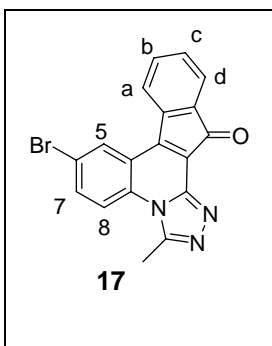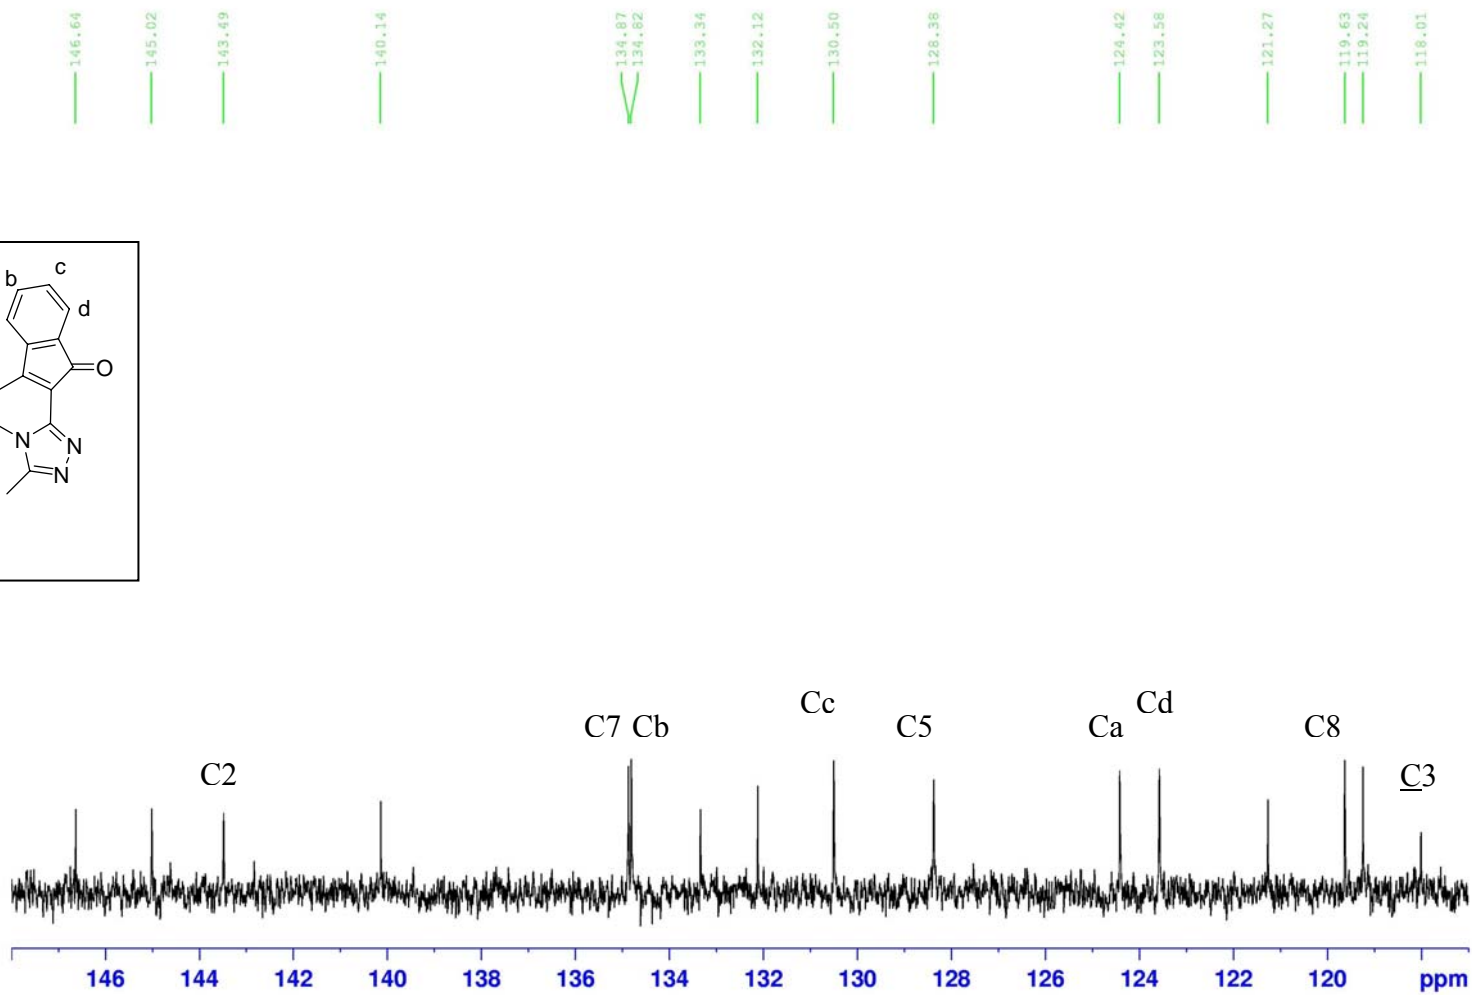

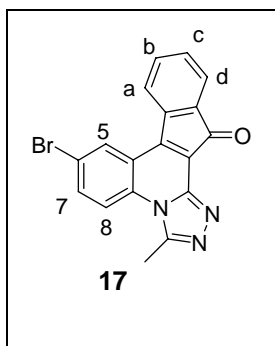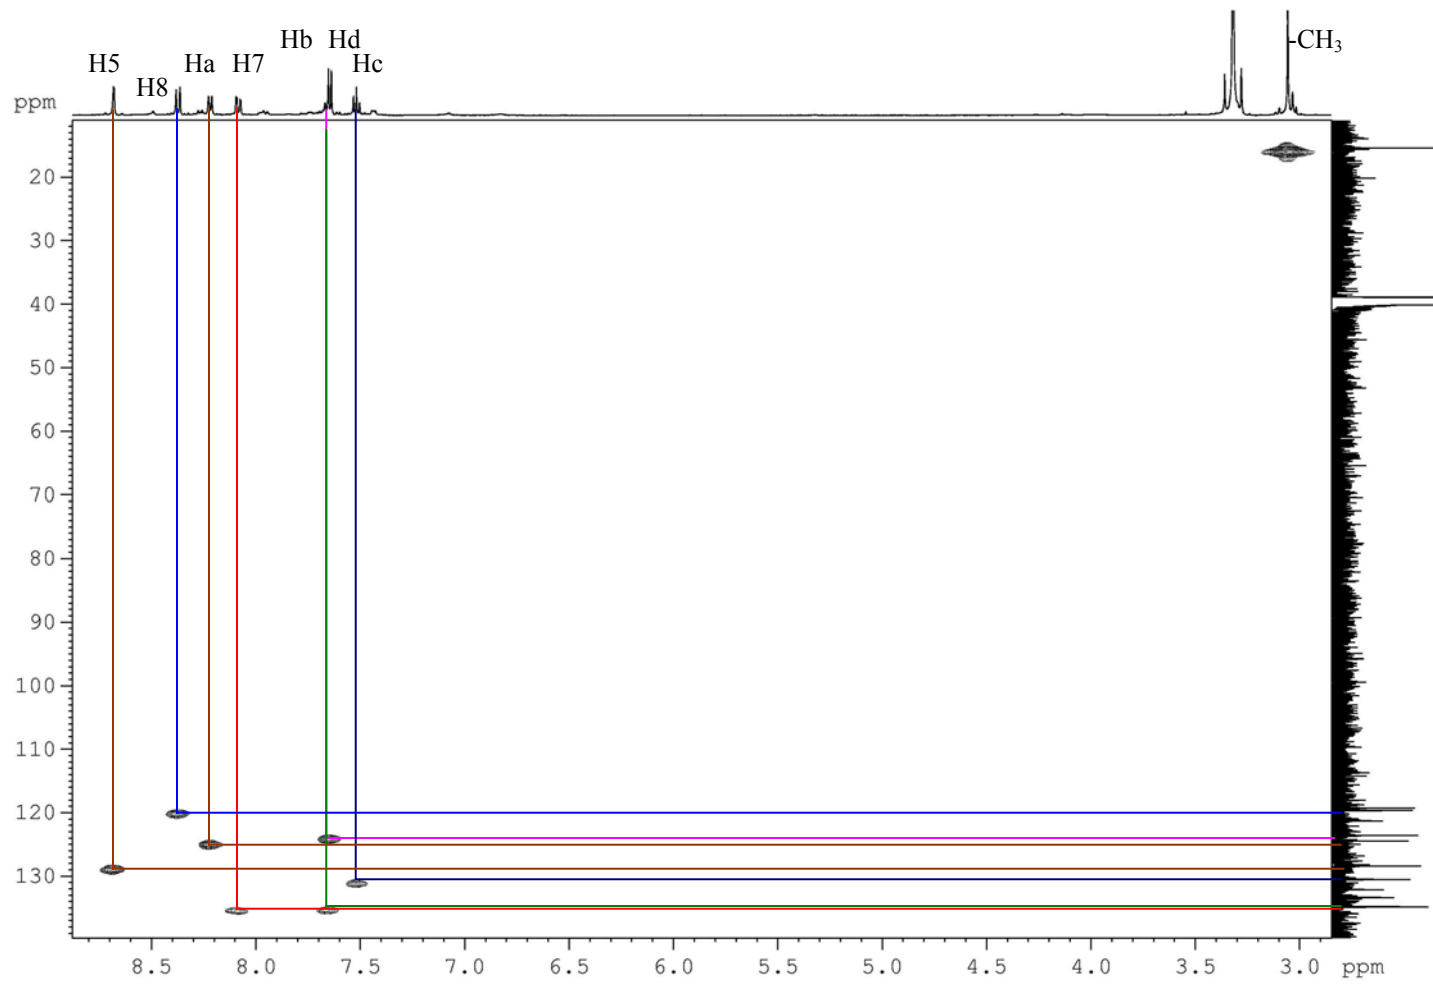

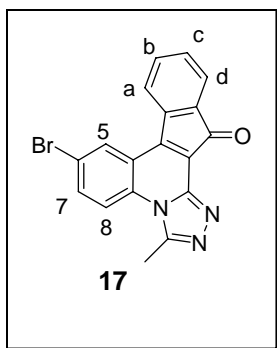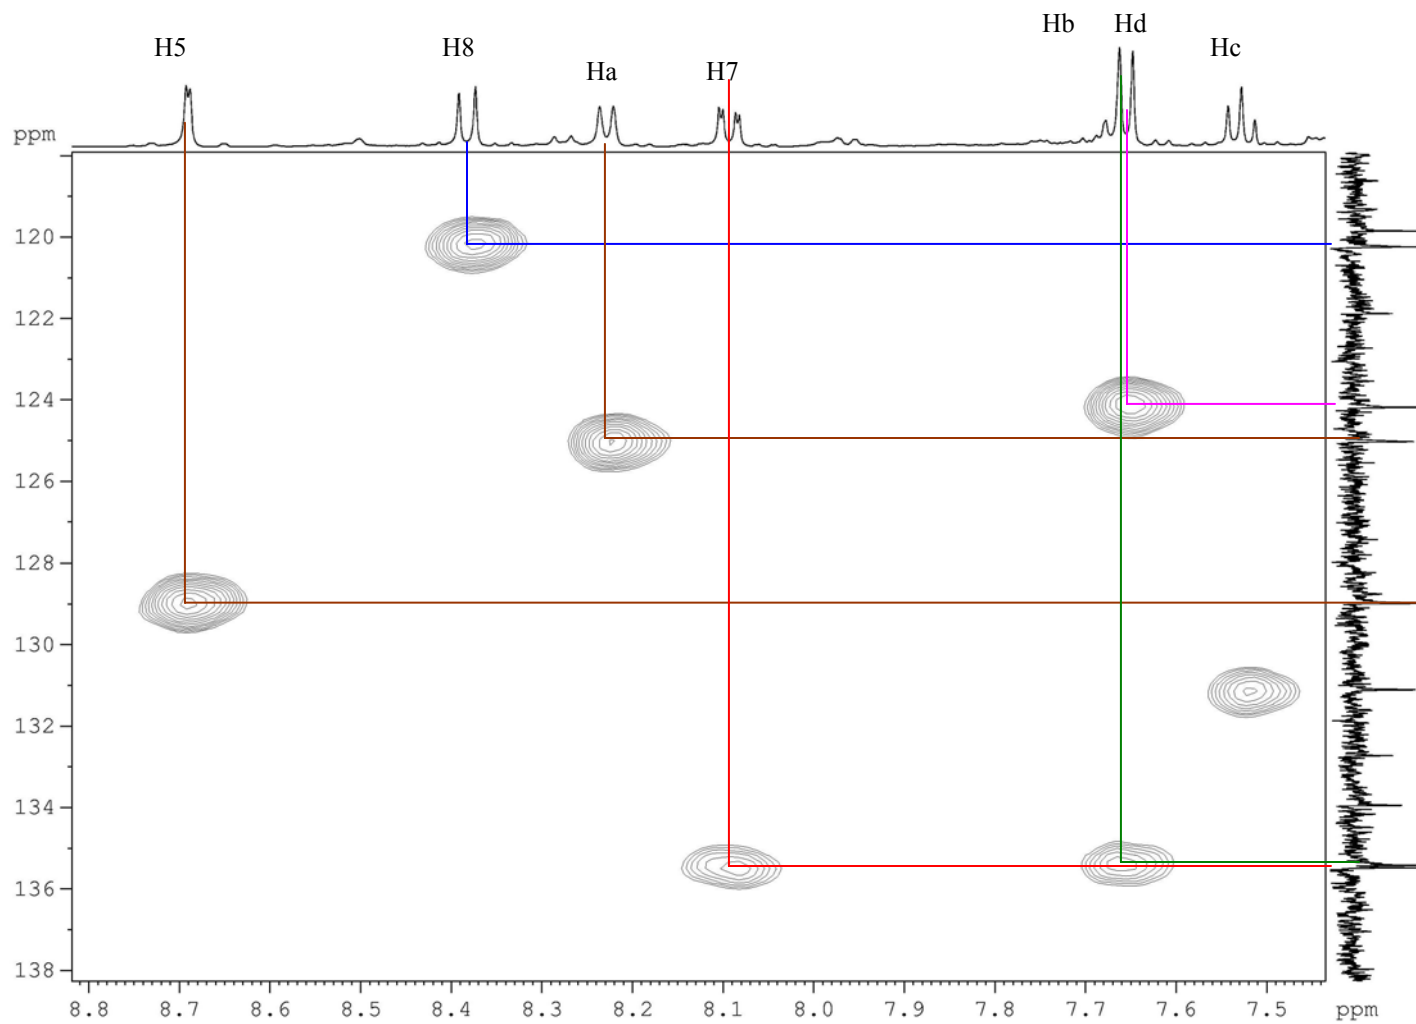

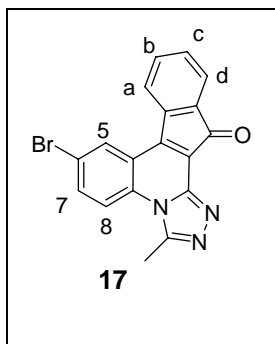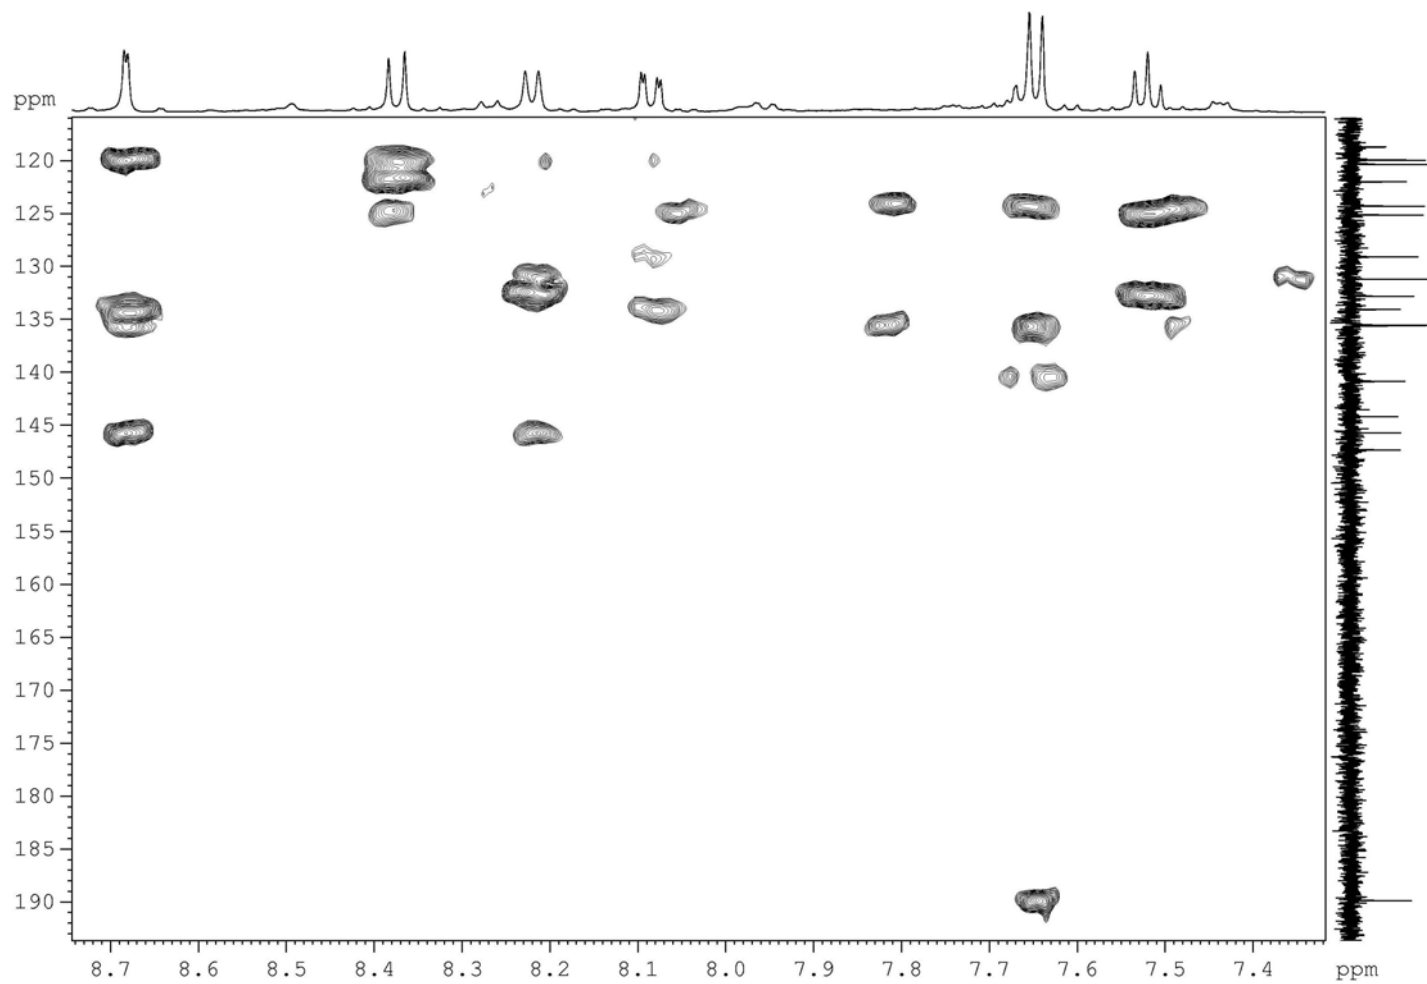



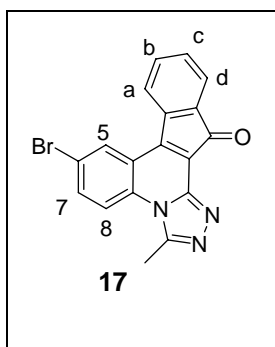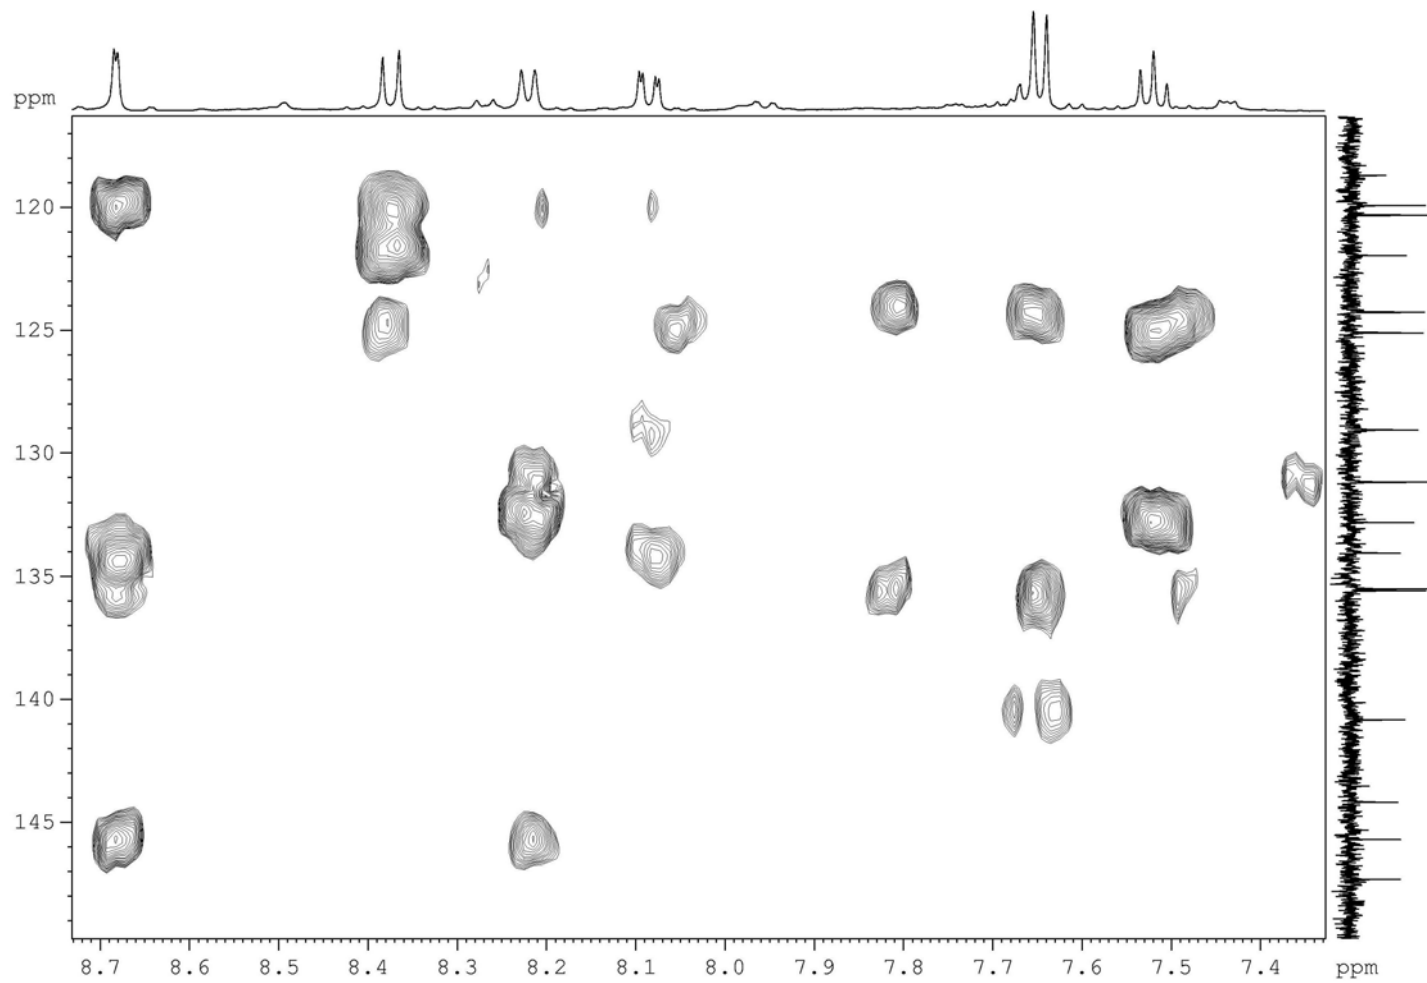

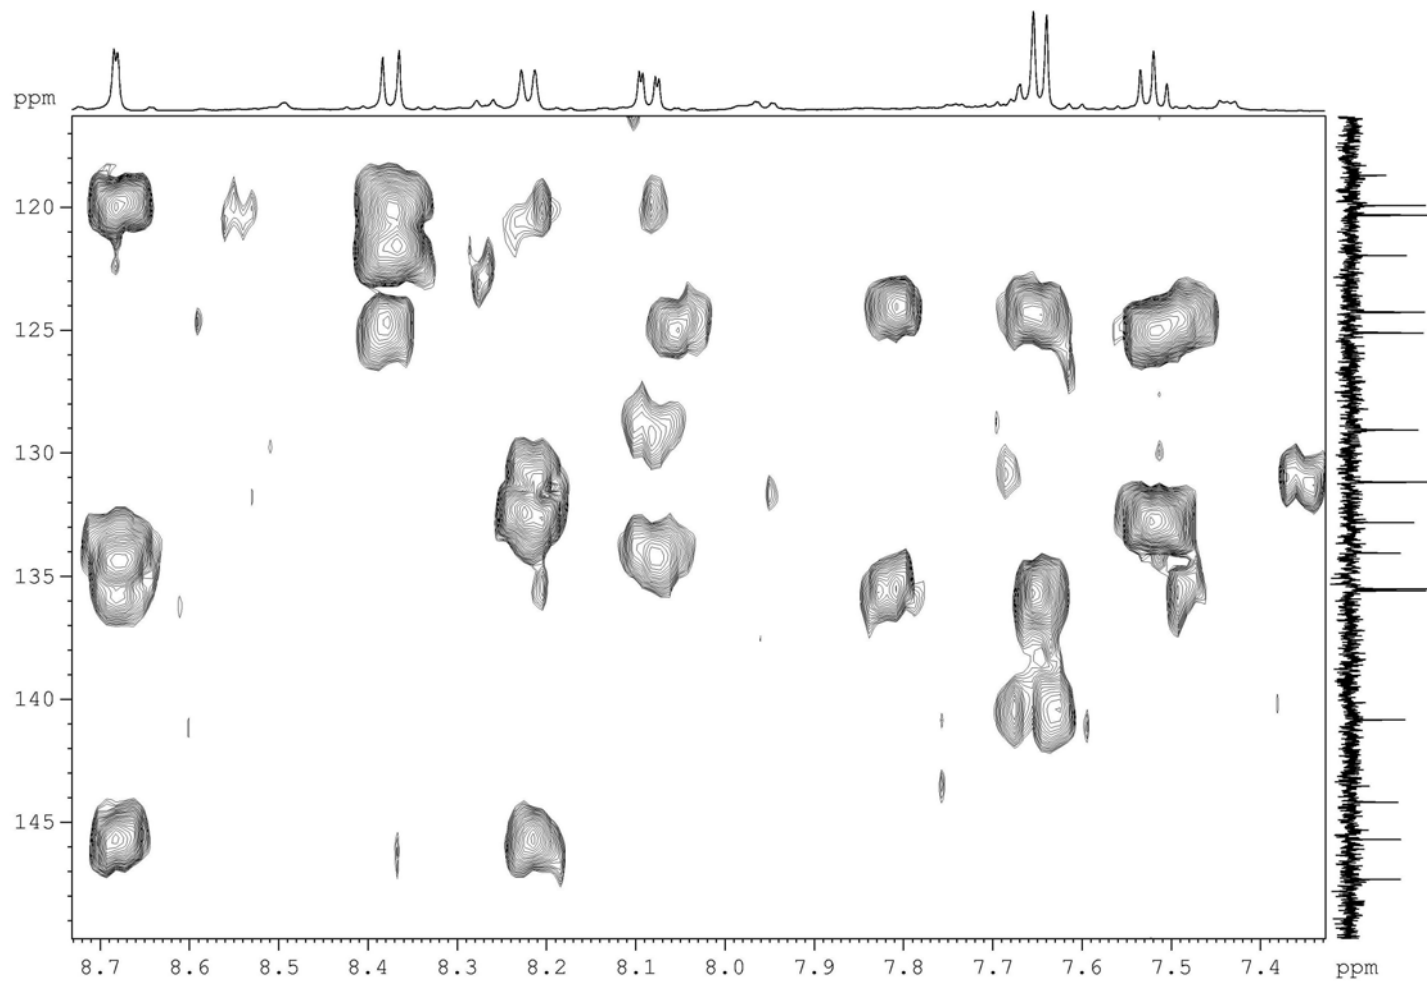

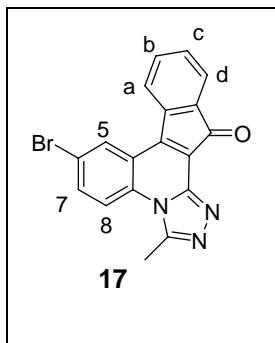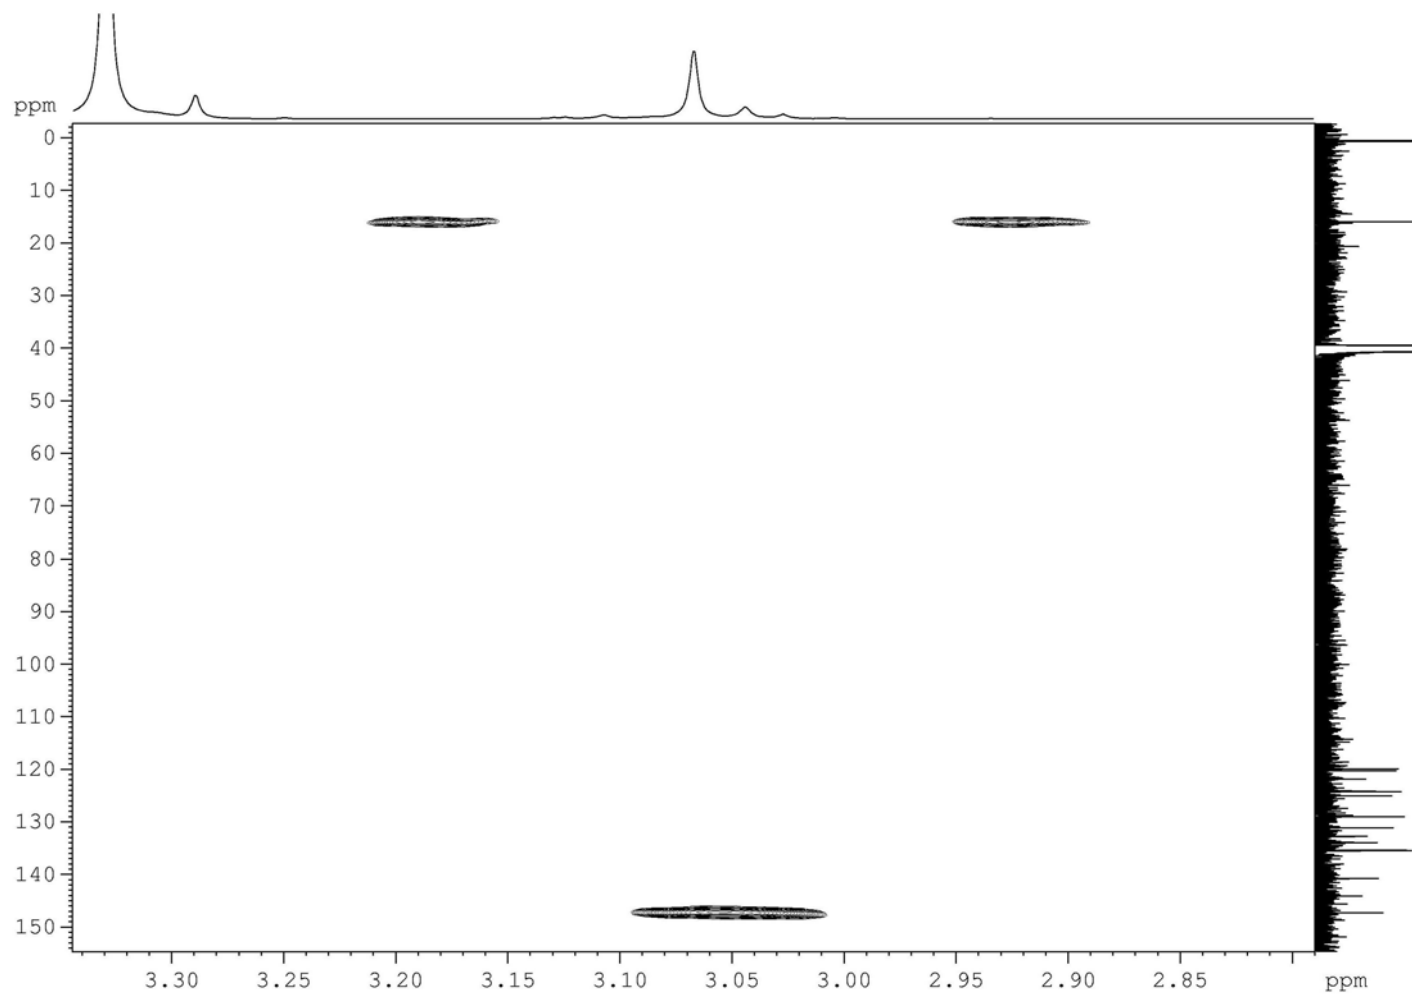

\*

Sample Name: CR080-96-99-99A1

INDIA  
Acq. Time: 15:21

Acq. Date: Thursday, January 28, 2010

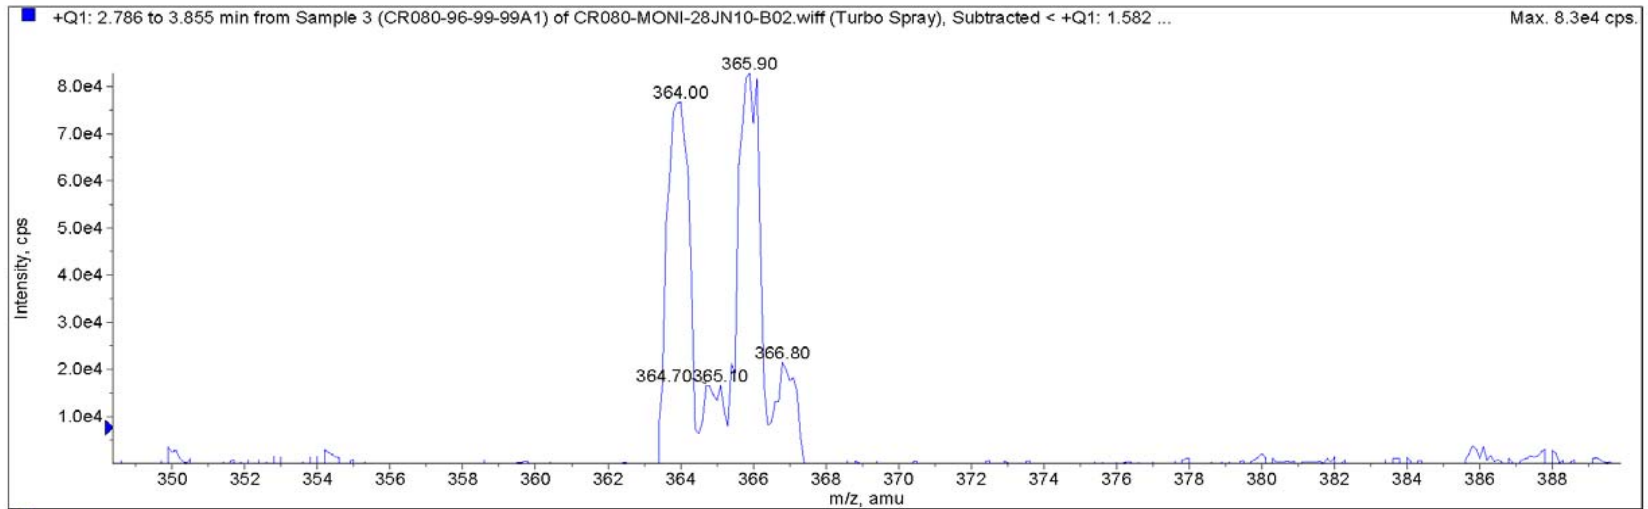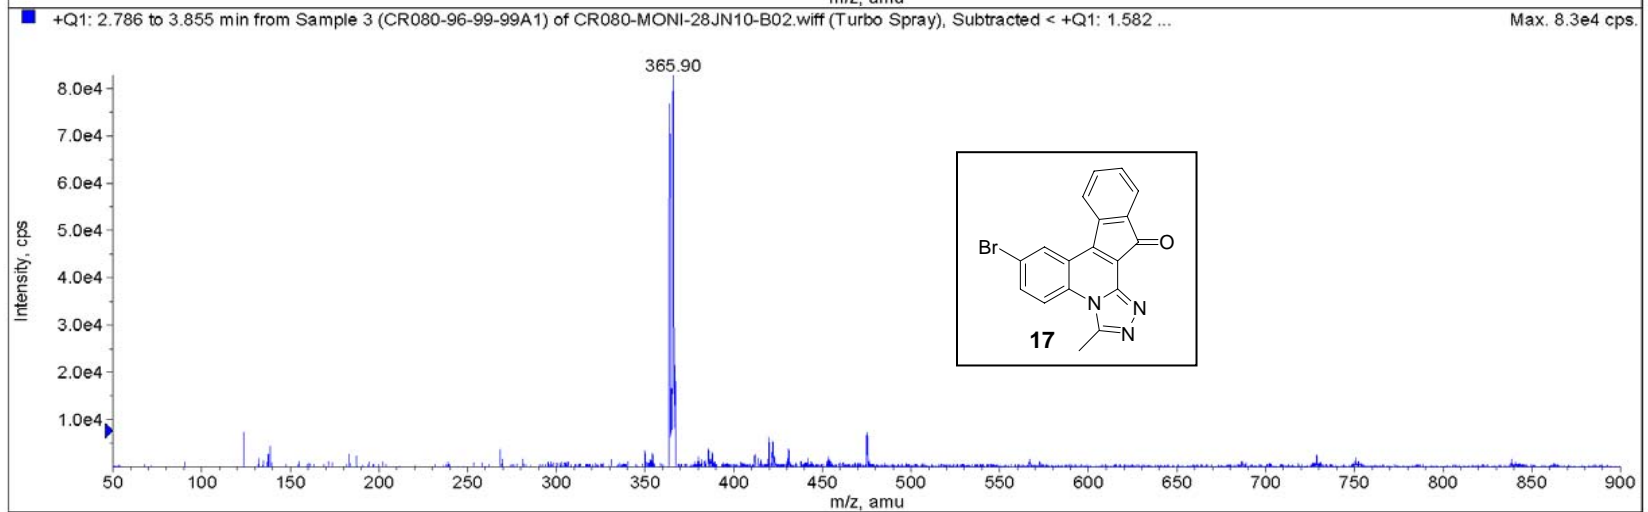

\*Sample Comment: [M+H] 364

Expected

\*\*Analyzed By :

\*\*Checked By :

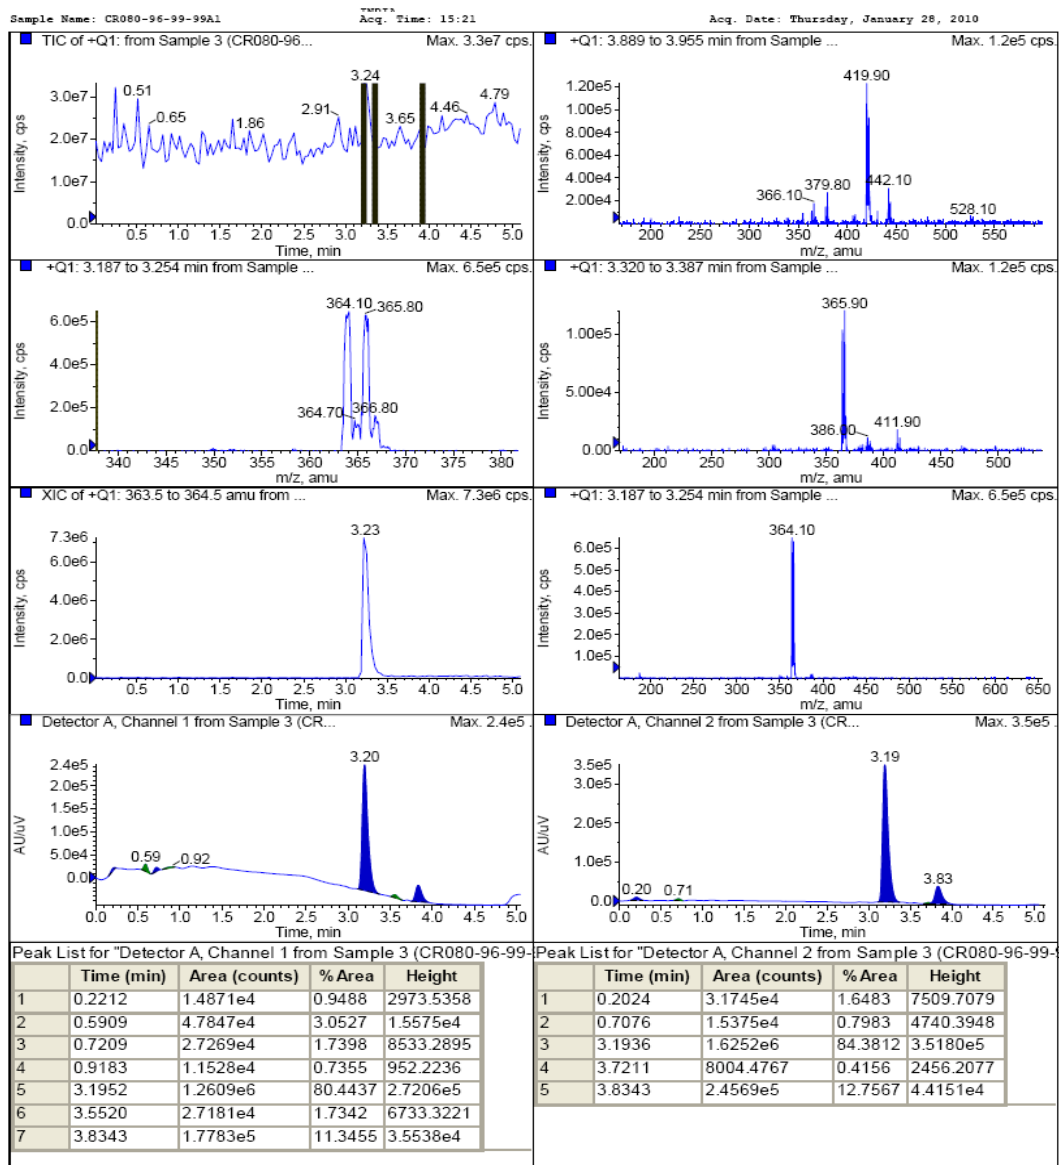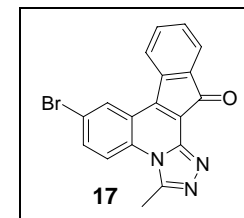

LCMS-1 REACN MONT (TFA Buffer)  
Channel 1 at wavelength 220nm, Channel 2 at wavelength 260 nm

Analysed By :

=====>  
 SAMPLE: CR080-96-99-99A1  
 Column: PUROSPHERE-RP18 (250X4.6)mm 5µ  
 Injection date : Thu, 11. Mar. 2010 Location : Vial 16  
 Sample Name : CR080-96-99-99A1 Inj. No. : 1  
 Acq Operator : BHUSHAN Inj. Vol. : 15 µl  
 Analysis Method : C:\CHEM32\2\METHODS\UPLC\_ISO\_50\_50.M  
 Last Changed : Thu, 11. Mar. 2010,  
 Acq. Method : C:\Chem32\2\DATA\MAR-10\110310A 2010-03-11 10-01-19\  
 UPLC\_ISO\_50\_50.M  
 Method ref : NP/A0011/59

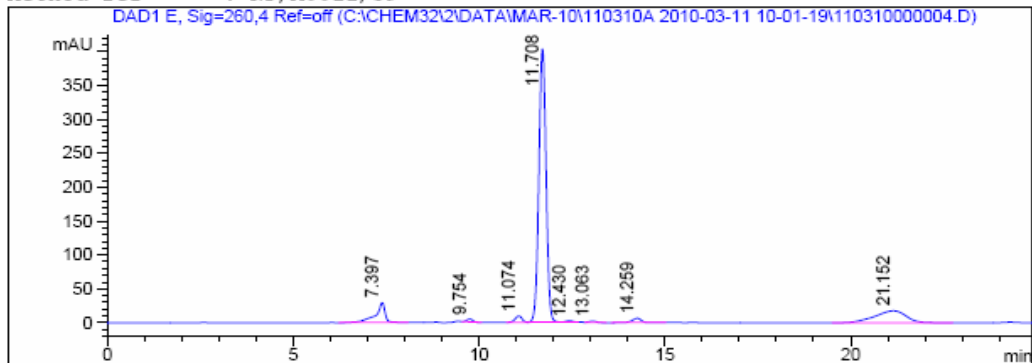

DAD1 E, Sig=260,4 Ref=off

| Peak # | RT (Min) | Width (Min) | Area    | Area % |
|--------|----------|-------------|---------|--------|
| 1      | 7.397    | 0.243       | 519.218 | 7.160  |
| 2      | 9.754    | 0.172       | 46.034  | 0.635  |
| 3      | 11.074   | 0.207       | 116.083 | 1.601  |
| 4      | 11.708   | 0.208       | 5.404e3 | 74.526 |
| 5      | 12.430   | 0.190       | 23.078  | 0.318  |
| 6      | 13.063   | 0.193       | 20.430  | 0.282  |
| 7      | 14.259   | 0.258       | 107.350 | 1.480  |
| 8      | 21.152   | 0.875       | 1.015e3 | 13.998 |

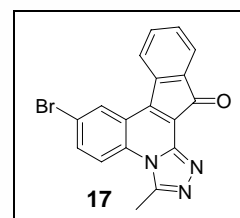

\*\*\* End of Report\*\*\*

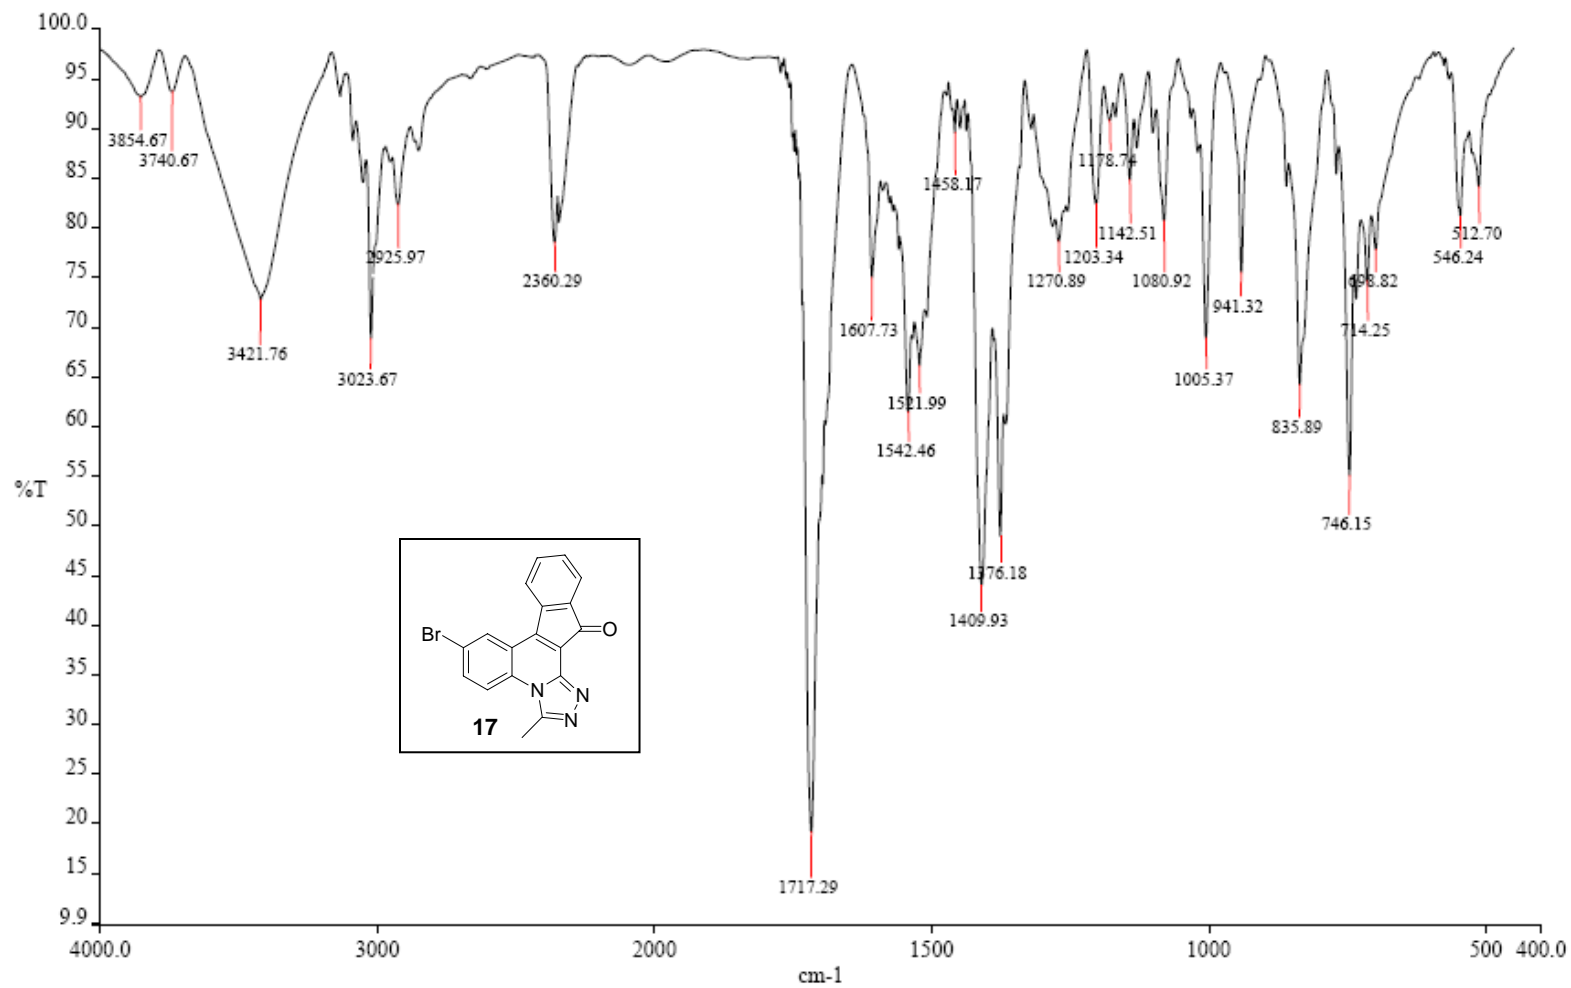

Spectrum Name: CR080-96-99-99A.sp

Analyst: GANESH

Accumulations: 16

Time: 1:02:38 PM

Description: CR080-96-99-99A IN KBr

Resolution: 4.00 cm-1

Date: 2/5/2010

NAME CR080-96-39-39A  
 EXPNO 1  
 PROCNO 1  
 Date\_ 20091116  
 Time 19.07  
 INSTRUM spect  
 PROBHD 5 mm DUL 13C-1  
 PULPROG zg30  
 TD 32768  
 SOLVENT CDCl3  
 NS 12  
 DS 0  
 SWH 8278.146 Hz  
 FIDRES 0.252629 Hz  
 AQ 1.9792372 sec  
 RG 40.3  
 DW 60.400 usec  
 DE 6.00 usec  
 TE 292.7 K  
 TD1 3.0000000 sec  
 TD0 1

----- CHANNEL f1 -----  
 NUC1 1H  
 P1 12.50 usec  
 PL1 -1.00 dB  
 SFO1 400.1324710 MHz  
 SI 16384  
 SF 400.1300129 MHz  
 WDW EM  
 SSB 0  
 LB 0.30 Hz  
 GB 0  
 PC 0.50

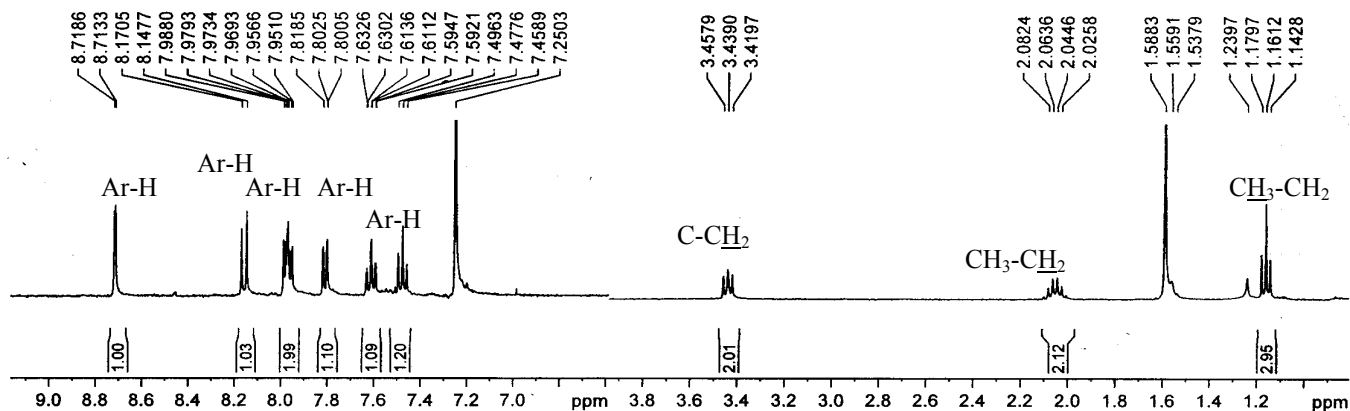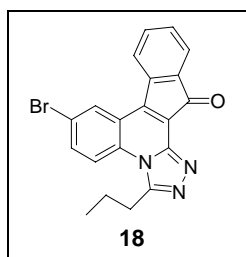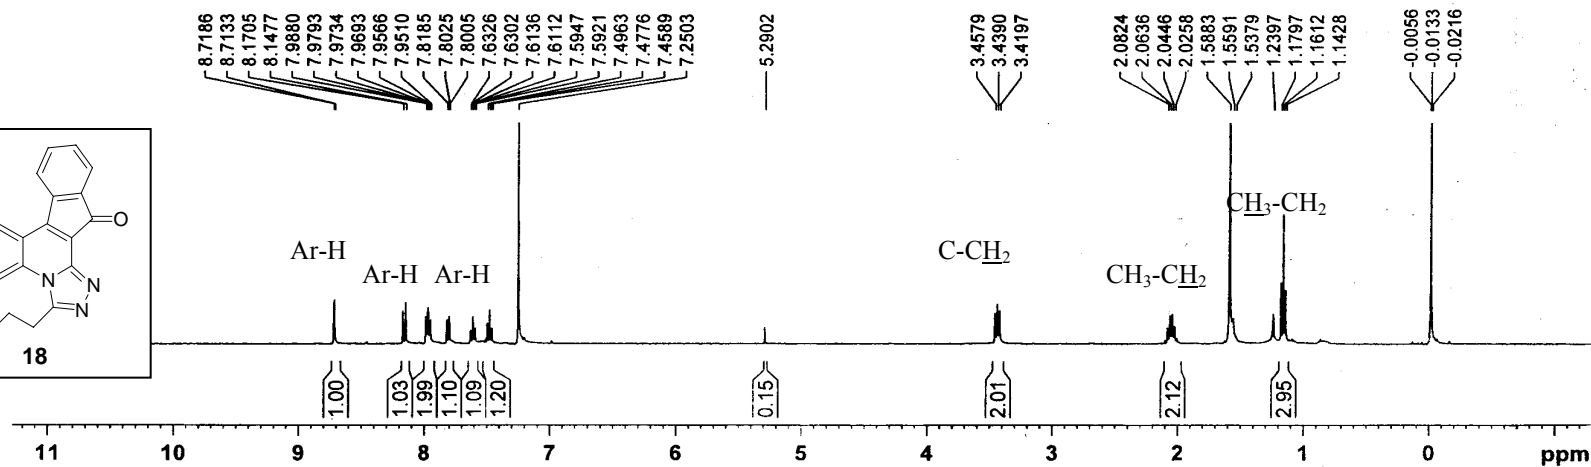



Current Data Parameters  
 NAME CRO60-99-39-39A1  
 EXPNO 1  
 PROCNO 1

F2 - Acquisition Parameters  
 Date\_ 20100301  
 Time 10.39  
 INSTRUM spect  
 PROBHD 5 mm DUL 13C-1  
 PULPROG zgpg30  
 TD 6552  
 SOLVENT CDCl3  
 NS 17000  
 DS 4  
 SWH 23592.814 Hz  
 FIDRES 1.365918 Hz  
 AQ 1.3664756 sec  
 RG 2580.3  
 DW 20.850 usec  
 DE 4.00 usec  
 TE 291.2 K  
 D1 2.0000000 sec  
 d11 0.0300000 sec  
 DELTA 1.8999999 sec  
 TDO 1

----- CHANNEL f1 -----  
 NUC1 13C  
 P1 7.00 usec  
 PL1 -2.00 dB  
 SFO1 100.6228294 MHz

----- CHANNEL f2 -----  
 CPDPRG2 waltz16  
 NUC2 1H  
 PCPD2 100.00 usec  
 PL2 -1.00 dB  
 PL12 14.92 dB  
 PL13 18.92 dB  
 SFO2 400.1316005 MHz

F2 - Processing parameters  
 SI 32768  
 SF 100.6127223 MHz  
 WDW EM  
 SSB 0  
 LB 5.00 Hz  
 GB 0  
 PC 0.20

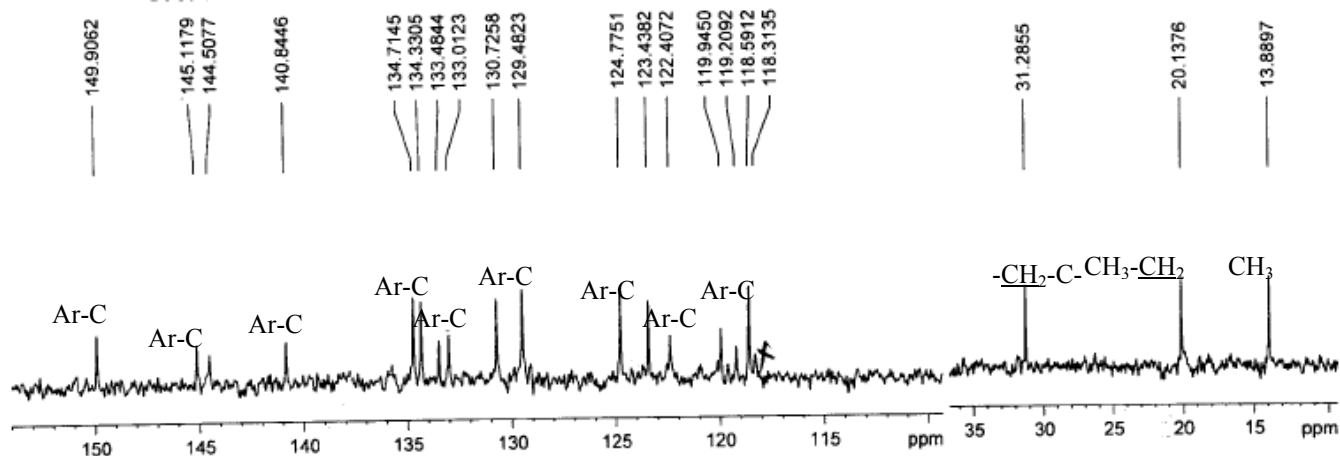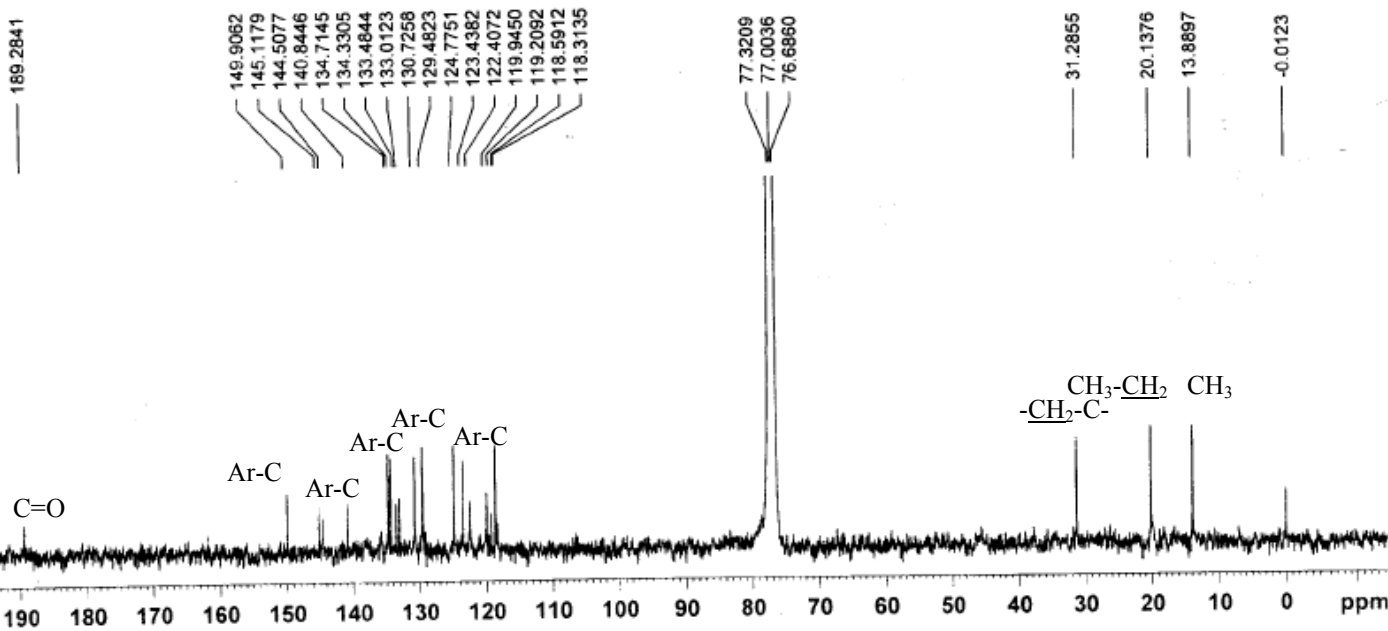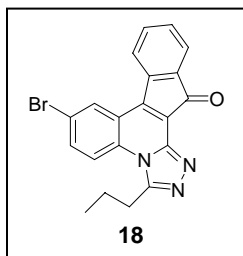

NAME CR080-96-39-39A1  
 EXPNO 2  
 PROCNO 1  
 Date\_ 20100302  
 Time 4.03  
 INSTRUM spect  
 PROBHD 5 mm QNP 13C-1  
 PULPROG zgpg13f  
 TD 65536  
 SOLVENT CDCl3  
 NS 7909  
 DS 4  
 SWH 23865.814 Hz  
 FIDRES 0.385918 Hz  
 AQ 1.3664756 sec  
 RG 26066  
 DW 20.850 usec  
 DE 6.00 usec  
 TE 290.3 K  
 CNST2 145.0000000  
 D1 2.90900000 sec  
 d2 0.00344828 sec  
 d12 0.00902050 sec  
 DELTA 0.00000993 sec  
 TDO 1

==== CHANNEL f1 =====  
 NUC1 13C  
 P1 7.80 usec  
 p2 15.65 usec  
 PL1 -2.00 dB  
 SFO1 100.6228298 MHz

==== CHANNEL f2 =====  
 CPDPRG2 waltz16  
 NUC2 1H  
 P3 12.50 usec  
 p4 25.00 usec  
 PCPD2 100.00 usec  
 PL2 -1.00 dB  
 PL12 14.32 dB  
 SFO2 400.1315005 MHz  
 SF 100.6127745 MHz  
 WDW EM  
 SSB 0  
 LB 8.00 Hz  
 GB 0  
 PC 0.20

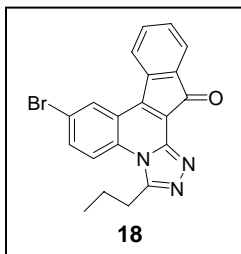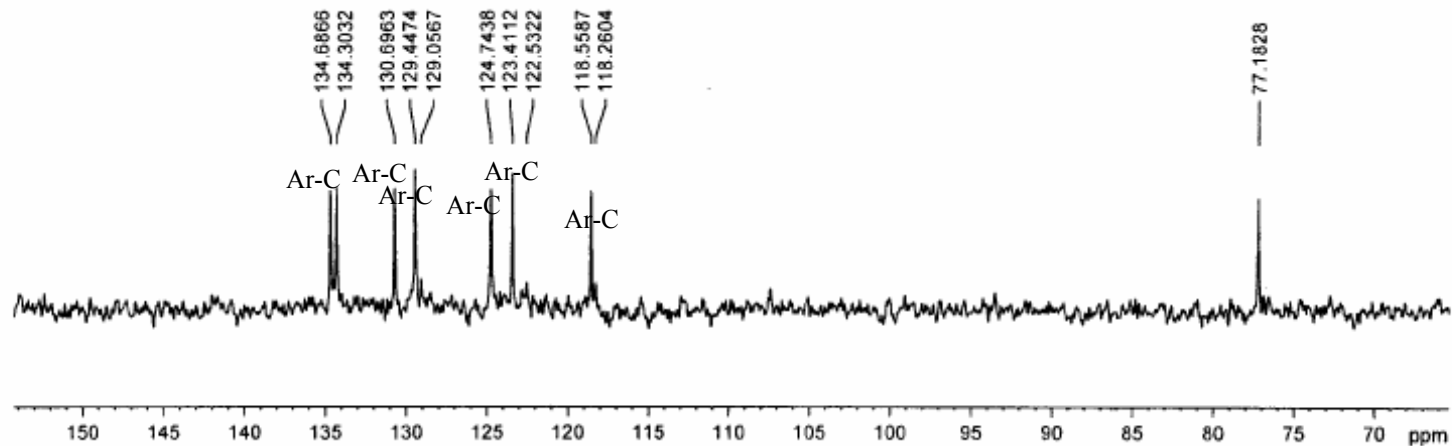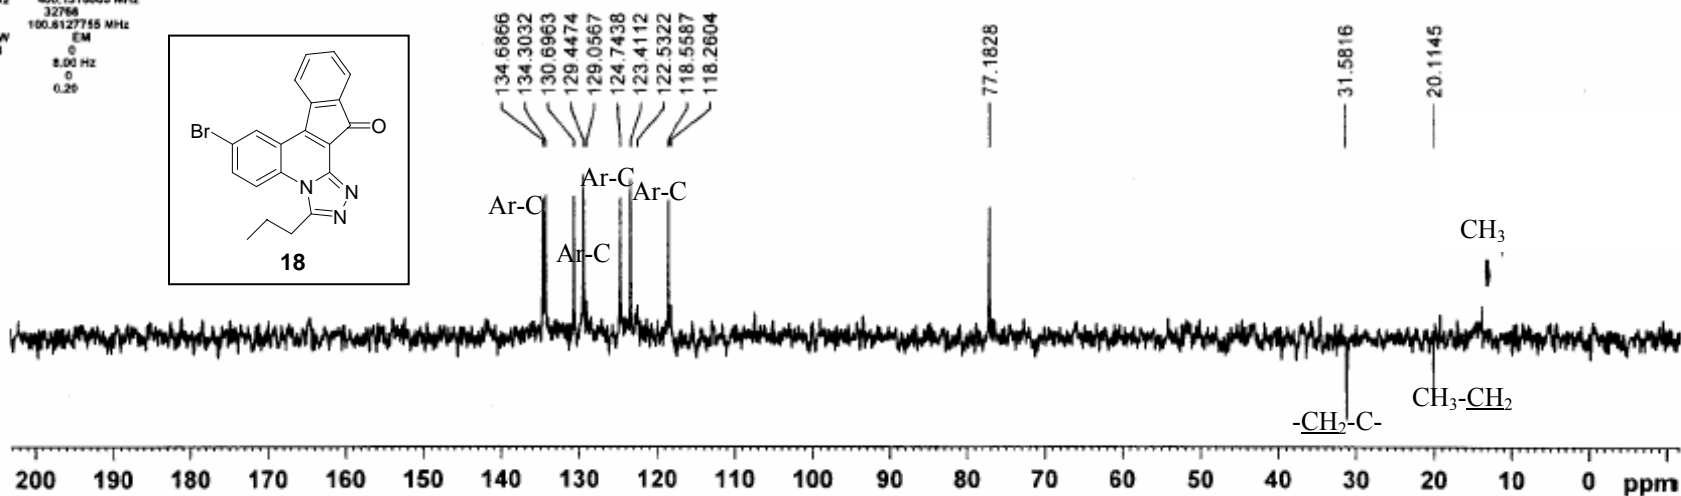

\*

Sample Name: CR080-96-39-39A

Acq. Time: 19:49

Acq. Date: Monday, November 16, 2009

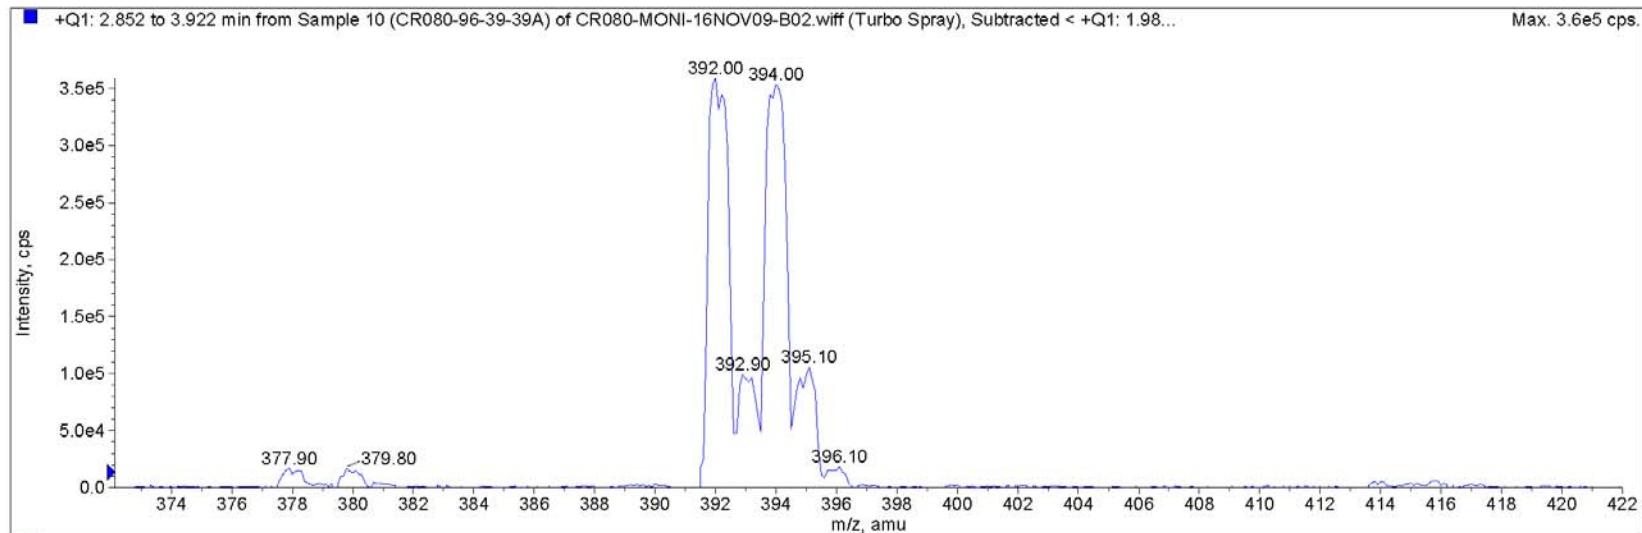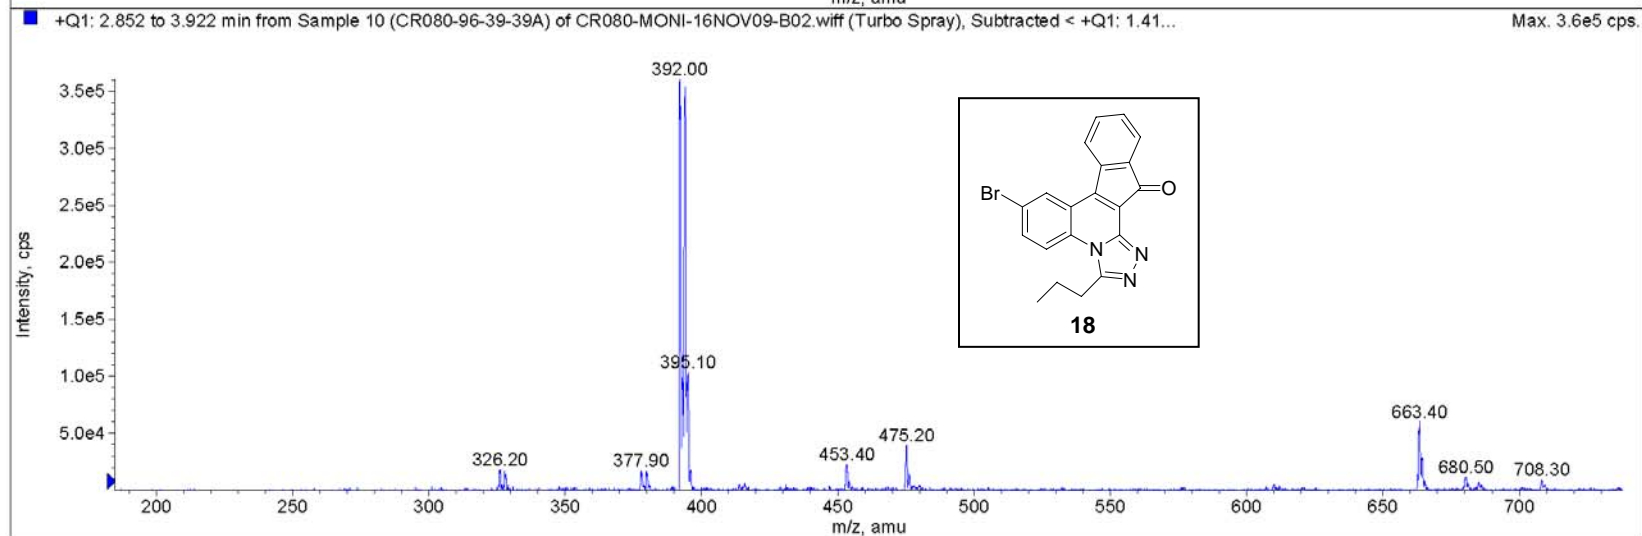

\*Sample Comment: [M+H] 392

Expected

\*\*Analyzed By :

\*\*Checked By :

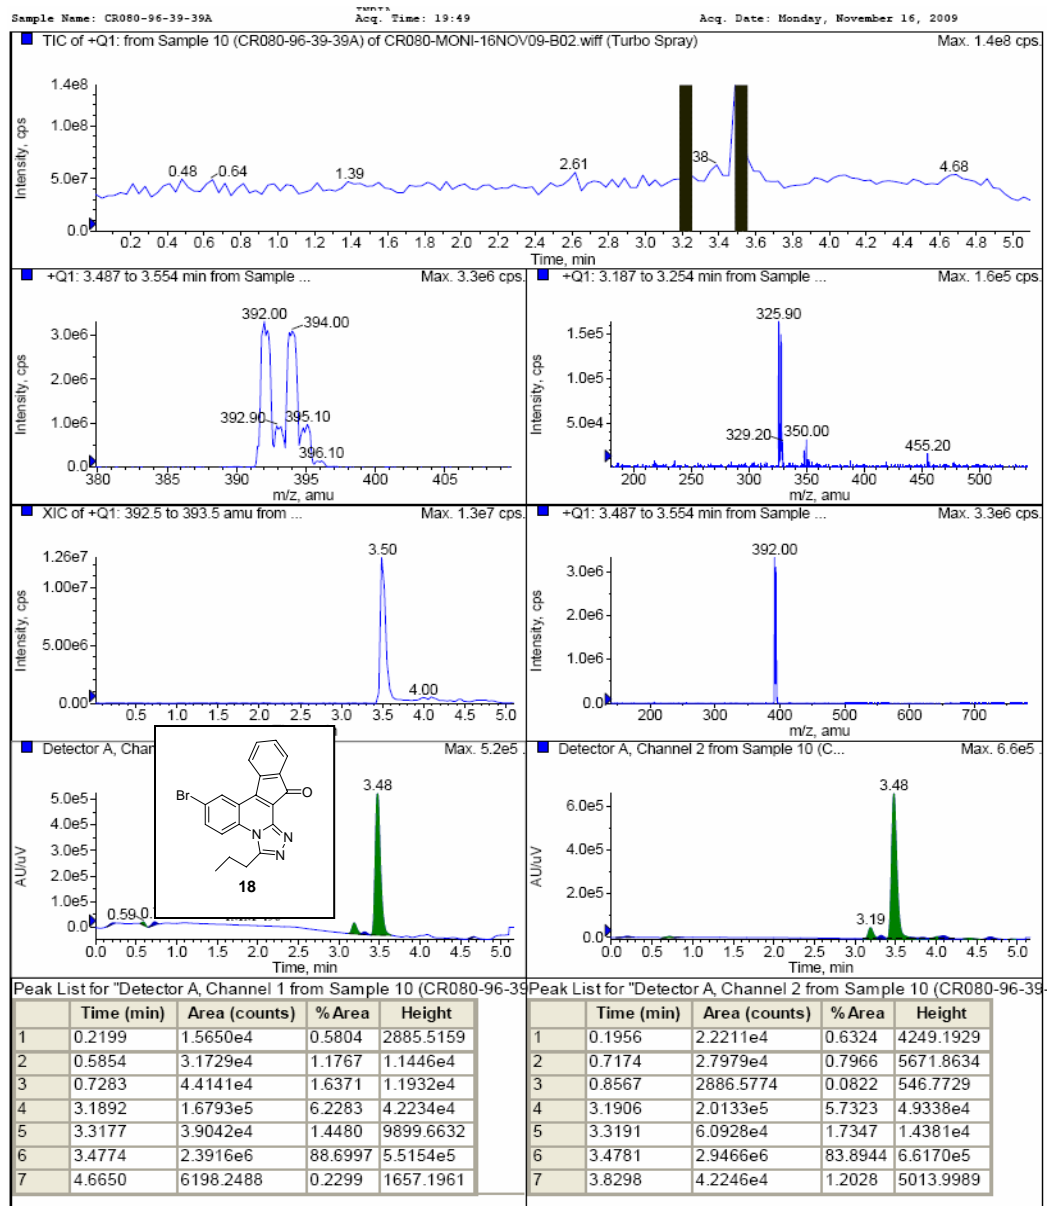

```

=====
SAMPLE: CR080-96-39-39 A
Column: GEMINI-C18(250X4.6)mm 5µ
Injection date : Fri, 5. Mar. 2010
Sample Name : CR080-96-39-39 A
Acq Operator : BHUSHAN
Analysis Method : C:\CHEM32\2\METHODS\UPLC_GENERAL_GRAD_1.M
Last Changed : Mon, 8. Mar. 2010,
Acq. Method : C:\Chem32\2\DATA\MAR-10\050310E 2010-03-05 16-35-20\
UPLC_GENERAL_GRAD_1.M
Method ref : NP/A0011/56
=====

```

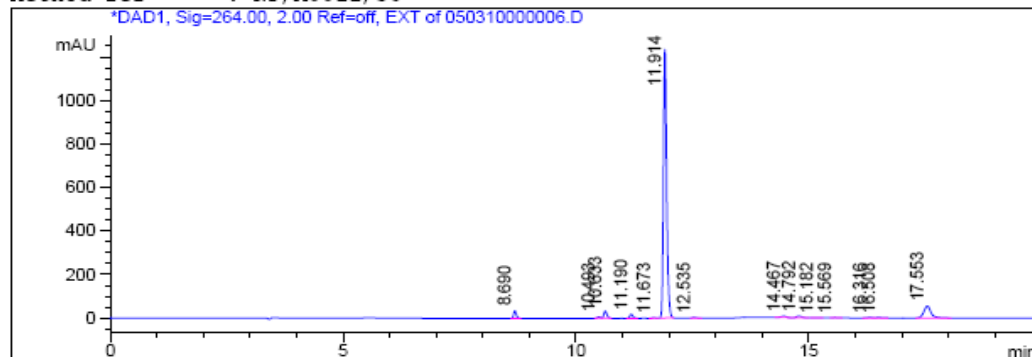

DAD1, Sig=264.00, 2.00 Ref=off, EXT

| Peak # | RT (Min) | Width (Min) | Area    | Area % |
|--------|----------|-------------|---------|--------|
| 1      | 8.690    | 0.064       | 137.043 | 1.939  |
| 2      | 10.493   | 0.062       | 23.326  | 0.330  |
| 3      | 10.633   | 0.073       | 145.084 | 2.052  |
| 4      | 11.190   | 0.077       | 88.321  | 1.249  |
| 5      | 11.673   | 0.087       | 12.239  | 0.173  |
| 6      | 11.914   | 0.080       | 5.907e3 | 83.565 |
| 7      | 12.535   | 0.094       | 20.460  | 0.289  |
| 8      | 14.467   | 0.128       | 44.996  | 0.637  |
| 9      | 14.792   | 0.126       | 57.948  | 0.820  |
| 10     | 15.182   | 0.144       | 6.538   | 0.092  |
| 11     | 15.569   | 0.114       | 10.059  | 0.142  |
| 12     | 16.316   | 0.135       | 20.007  | 0.283  |
| 13     | 16.508   | 0.145       | 20.341  | 0.288  |
| 14     | 17.553   | 0.175       | 575.369 | 8.140  |

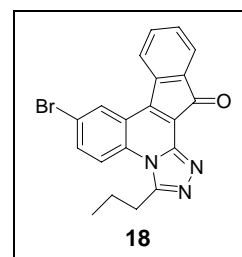

\*\*\* End of Report\*\*\*

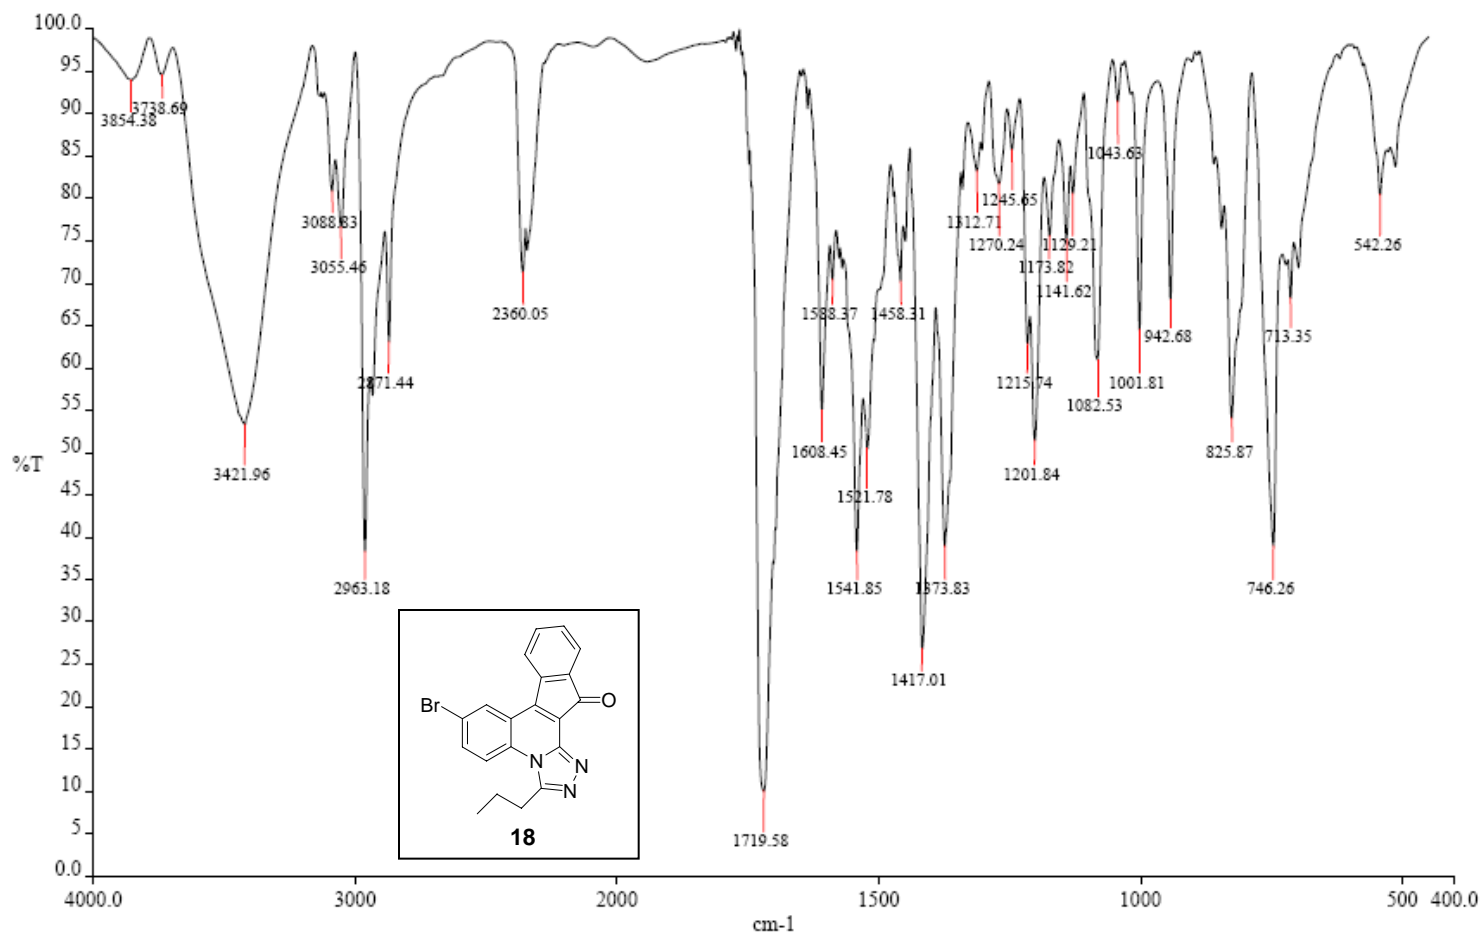

Spectrum Name: CR080-96-39-39A.sp Analyst: GANESH

Accumulations: 16

Time: 5:49:57 PM

Description: CR080-96-39-39A IN KBr

Resolution: 4.00 cm<sup>-1</sup>

Date: 2/5/2010

Current Data Parameters  
 NAME CR080-88-36-36A  
 EXPNO 1  
 PROCNO 1

F2 - Acquisition Parameters  
 Date\_ 20081111  
 Time 17.41  
 INSTRUM spect  
 PROBHD 5 mm DUL 13C-1  
 PULPROG zg30  
 TD 32788  
 SOLVENT CDCl3  
 NS 18  
 DS 0  
 SWH 8278.148 Hz  
 FIDRES 0.262828 Hz  
 AQ 1.8792372 sec  
 RG 382  
 DW 80.400 usec  
 DE 8.00 usec  
 TE 291.2 K  
 D1 3.0000000 sec  
 TD0 1

===== CHANNEL f1 =====

NUC1 1H  
 P1 12.50 usec  
 PL1 -1.00 dB  
 SFO1 400.1324710 MHz

F2 - Processing parameters  
 SI 16384  
 SF 400.1300128 MHz  
 WDW EM  
 SSB 0  
 LB 0.30 Hz  
 GB 0  
 PC 0.60

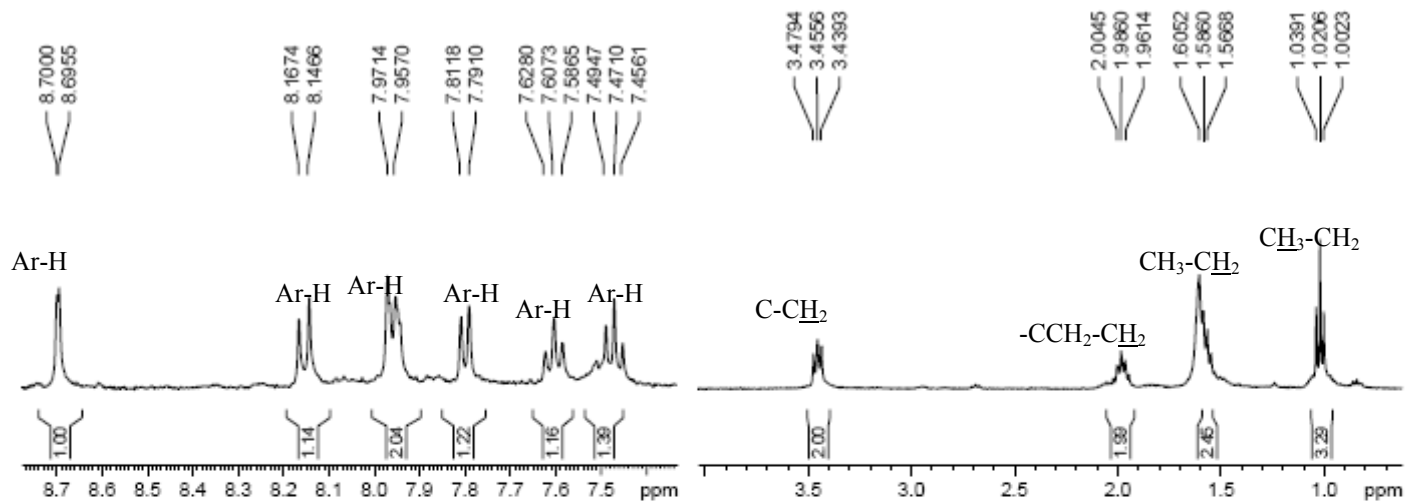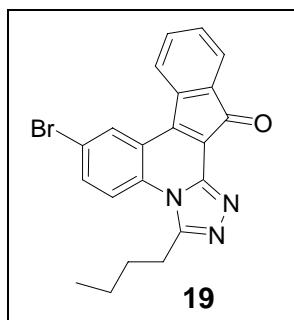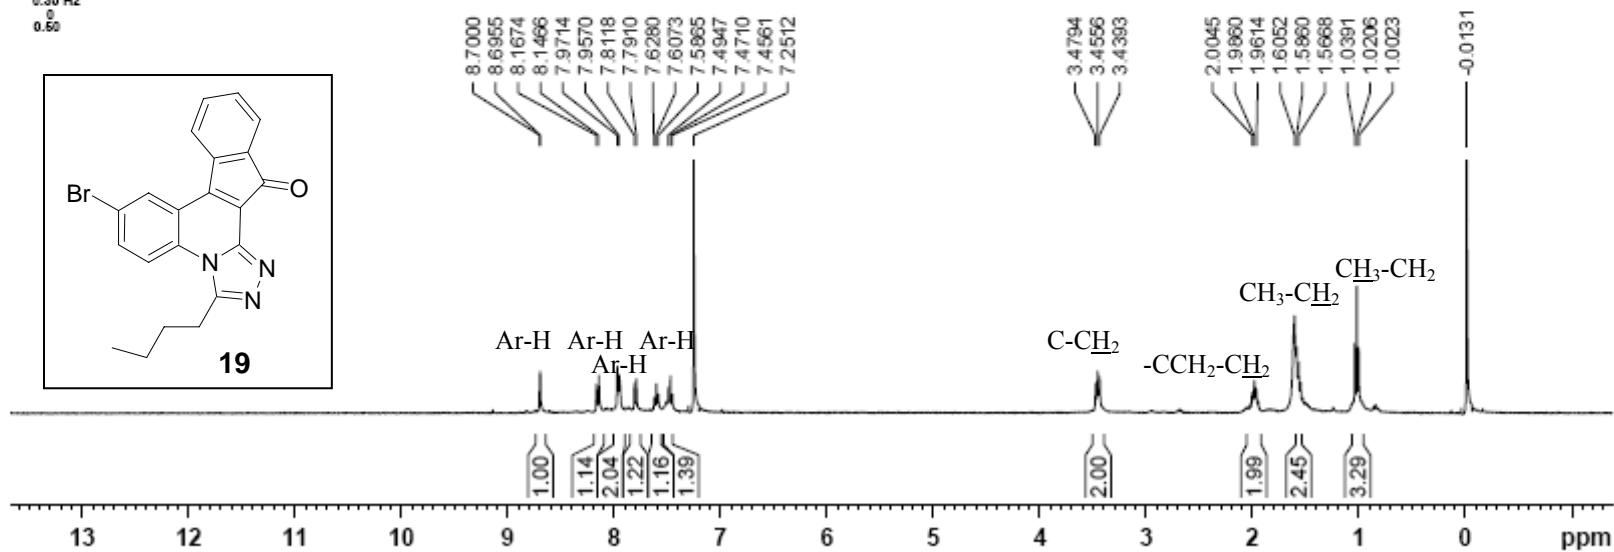

Current Data Parameters  
 NAME CR880-35-35A  
 EXPNO 1  
 PROCNO 1

F2 - Acquisition Parameters  
 Date\_ 20190227  
 Time 15.21  
 INSTRUM spect  
 PROBHD 5 mm DUL 13C-1  
 PULPROG zgpg20  
 TO 655.6  
 SOLVENT CDCl3  
 DS 4  
 HS 17405  
 SWH 23665.014 Hz  
 FIDRES 0.295918 Hz  
 AQ 1.3994750 sec  
 RG 6502  
 DW 20.850 usec  
 DE 5.00 usec  
 TE 292.2 K  
 DT 2.95000000 sec  
 cH1 0.02000000 sec  
 DELTA 1.89999990 sec  
 TDO 1

===== CHANNEL f1 =====  
 NUC1 13C  
 P1 7.00 usec  
 PL1 -2.00 dB  
 SFO1 100.6220200 MHz

===== CHANNEL f2 =====  
 CPOPRG2 waltz16  
 NUC2 1H  
 PCPD2 93.00 usec  
 PL2 -1.00 dB  
 PL12 14.00 dB  
 PL13 18.00 dB  
 SFO2 400.1316005 MHz

F2 - Processing parameters  
 SI 32768  
 SF 100.6127740 MHz  
 EN 0  
 SSB 0  
 LB 5.00 Hz  
 GB 0  
 PC 0.20

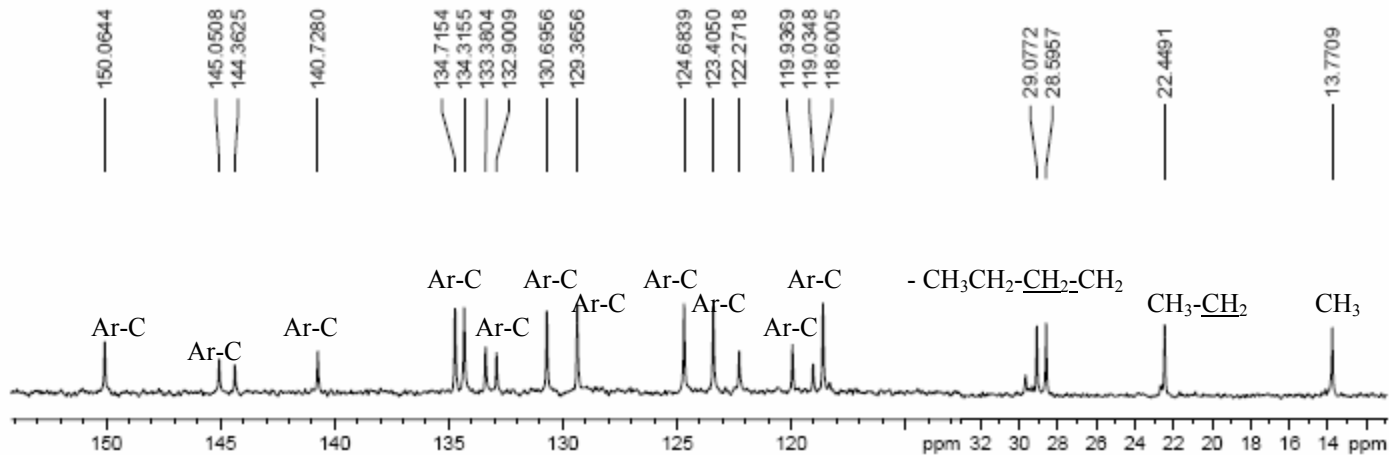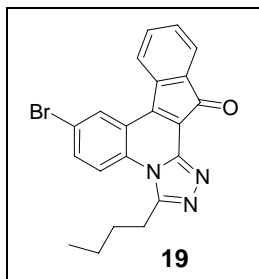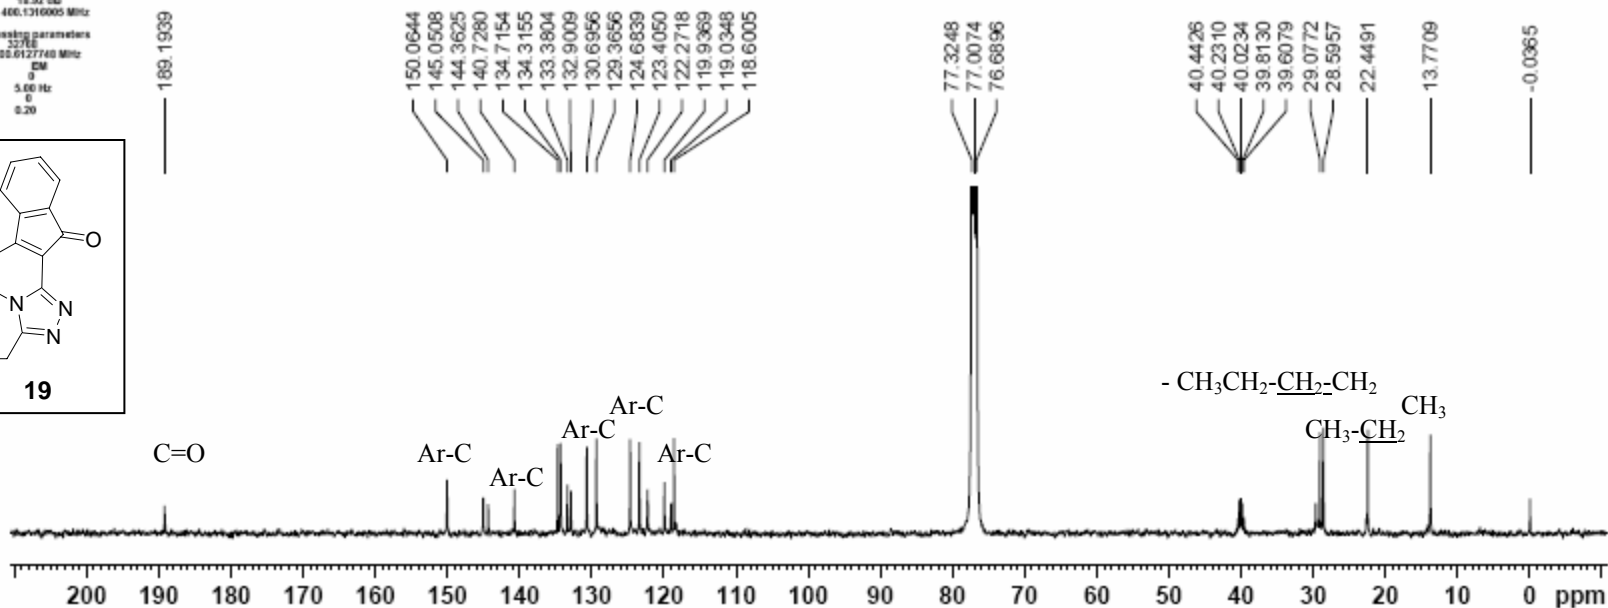



Current Data Parameters  
 NAME CR99-42-05-05A  
 EXPNO 1  
 PROCNO 1

F2 - Acquisition Parameters  
 Date\_ 20190228  
 Time 9.35  
 INSTRUM spect  
 PROBHD 5 mm QNP 13C-1  
 PULPROG zgpg30  
 TD 65536  
 SOLVENT CDCl3  
 NS 1619  
 DS 4  
 SWH 23060.814 Hz  
 FREQ 130.61018 Hz  
 AQ 1.3664756 sec  
 RG 2064  
 DW 26.253 usec  
 DC 0.30 usec  
 TE 296.5 K  
 CNGT2 145.390699  
 D1 2.30969300 sec  
 d2 0.06344028 sec  
 d12 0.0962390 sec  
 DELTA 8.4906693 sec  
 TDR 1

===== CHANNEL f1 =====  
 NUC1 13C  
 P1 7.83 usec  
 p2 15.83 usec  
 PL1 -2.89 dB  
 SFO1 101.6252618 MHz

===== CHANNEL f2 =====  
 CDPFG2 waltz16  
 NUC2 1H  
 P3 12.50 usec  
 p4 25.83 usec  
 PCPD2 100.00 usec  
 PL3 -1.88 dB  
 PL4 14.92 dB  
 SFO2 400.1316665 MHz

F2 - Processing parameters  
 SI 32768  
 SF 163.8127748 MHz  
 WDW EM  
 SSB 0  
 LB 0.00 Hz  
 GB 0  
 PC 0.39

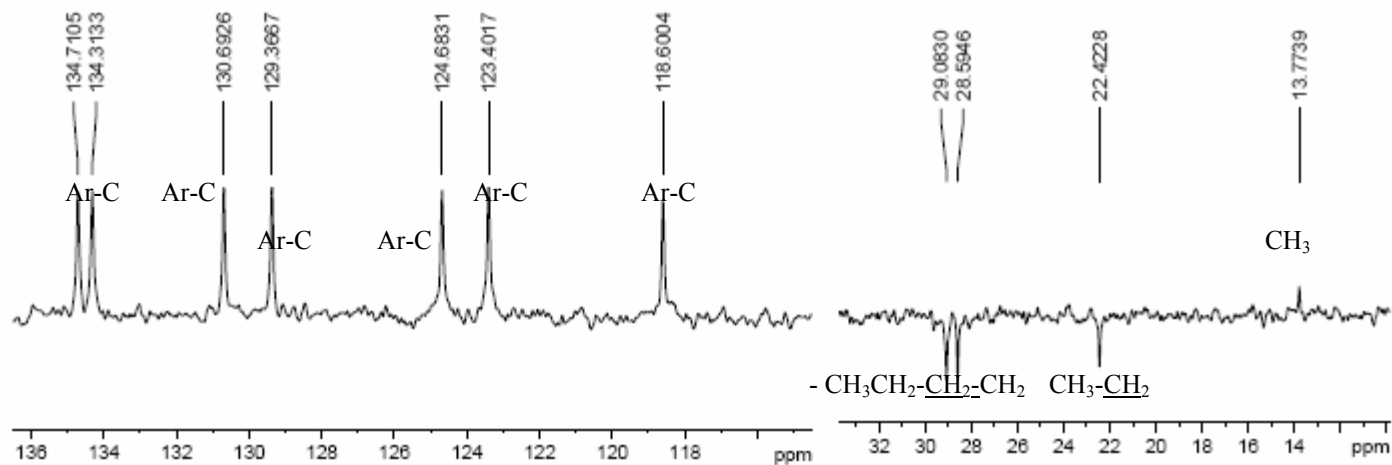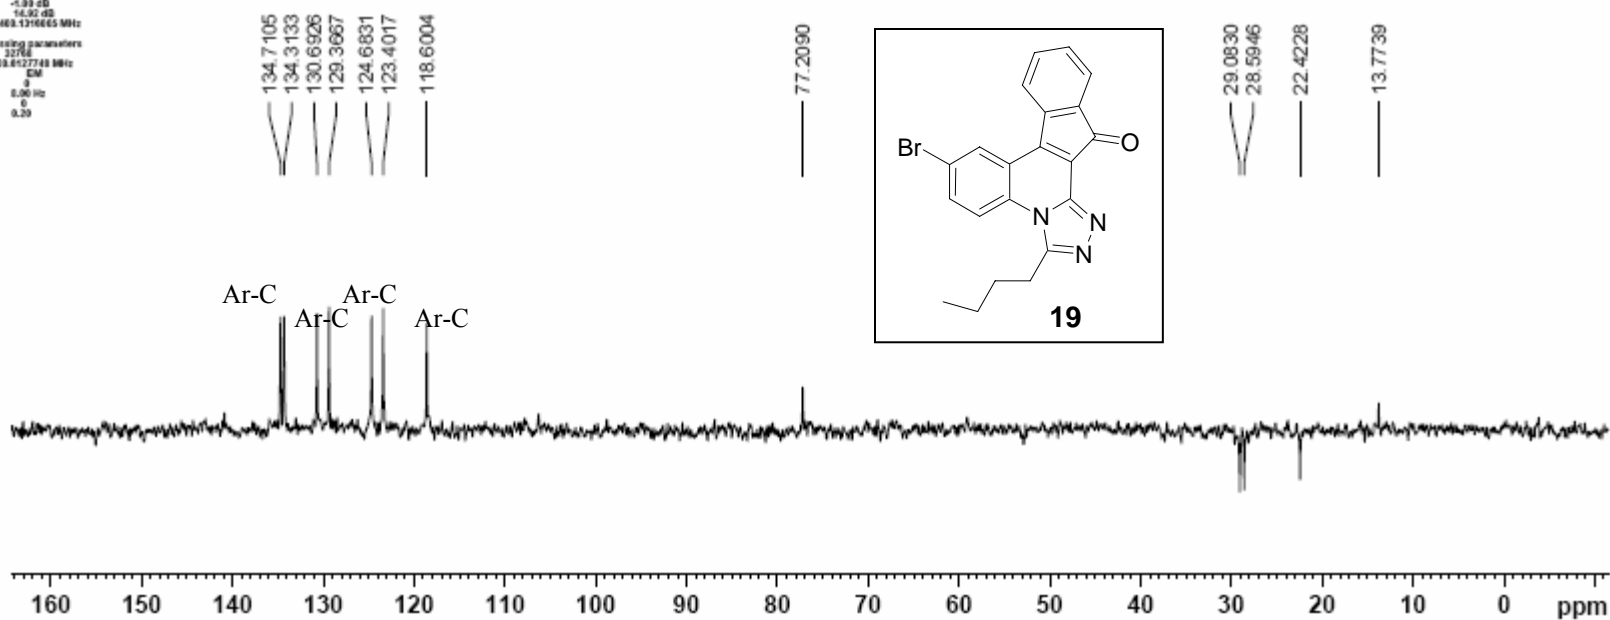

\*

Sample Name: CR080-96-35-35A

INDIA  
Acq. Time: 15:15

Acq. Date: Wednesday, November 11, 2009

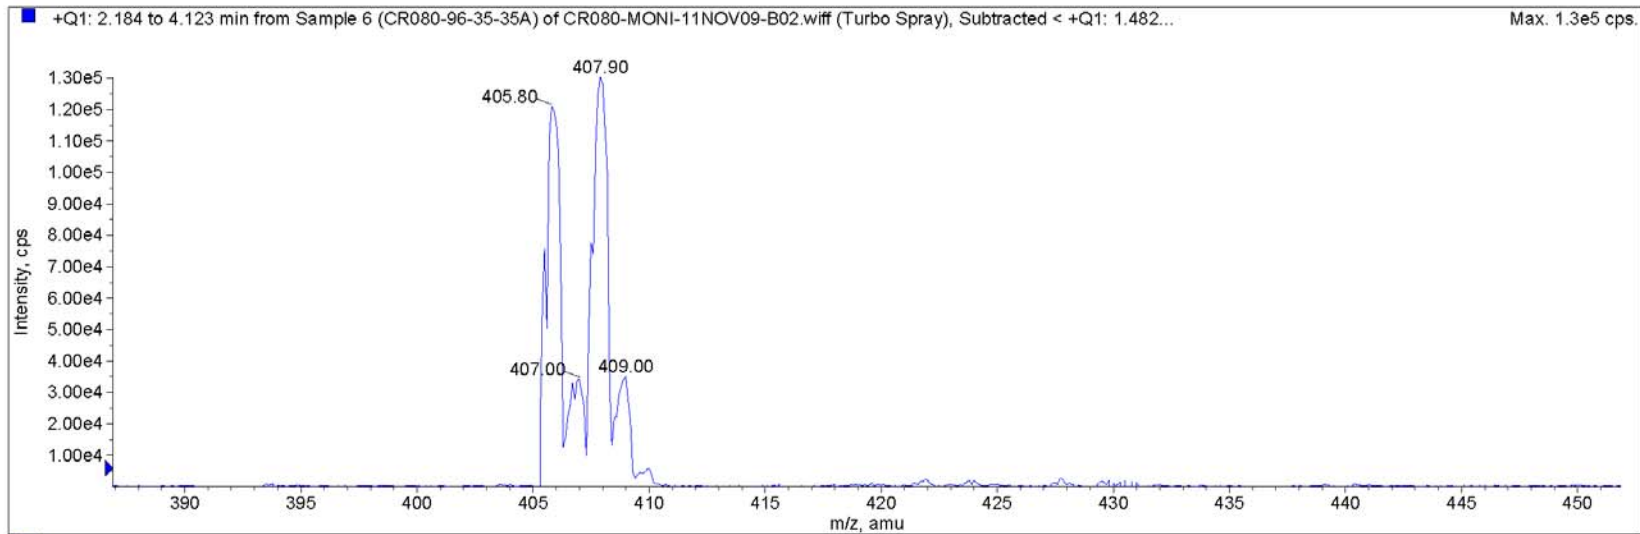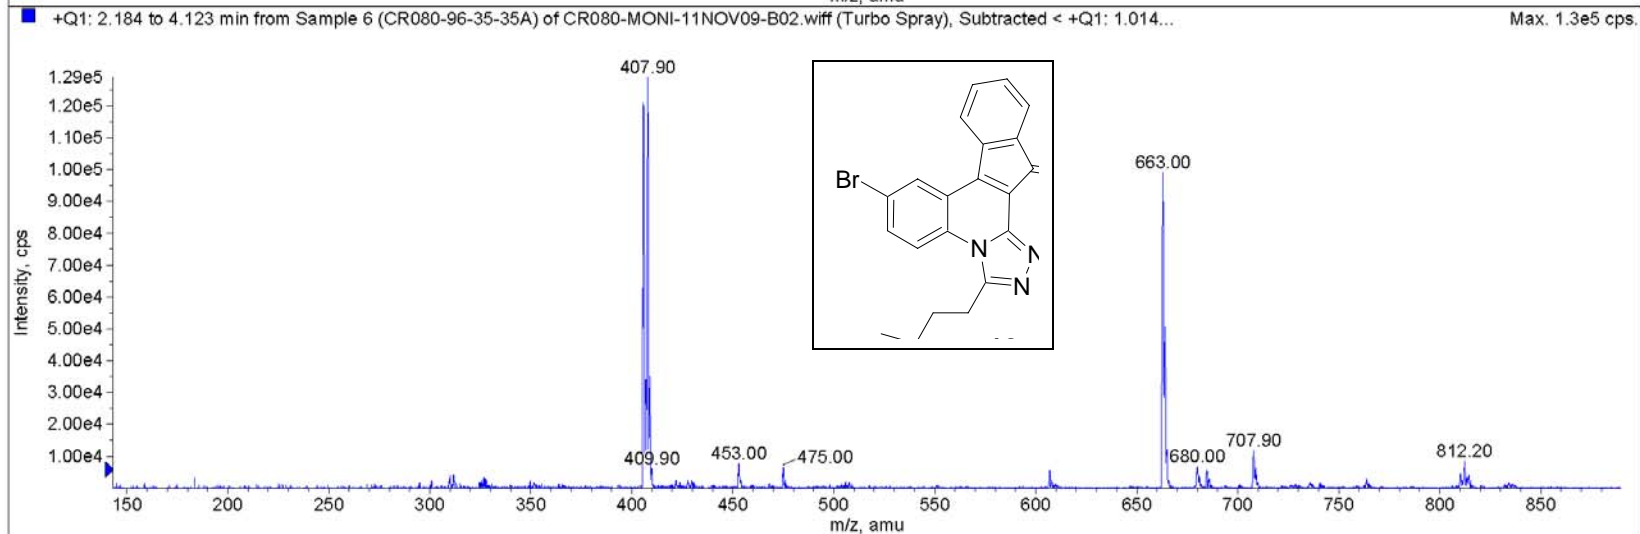

\*Sample Comment: [M+H] 406

Expected

\*\*Analyzed By :

\*\*Checked By :

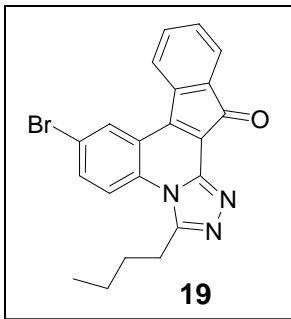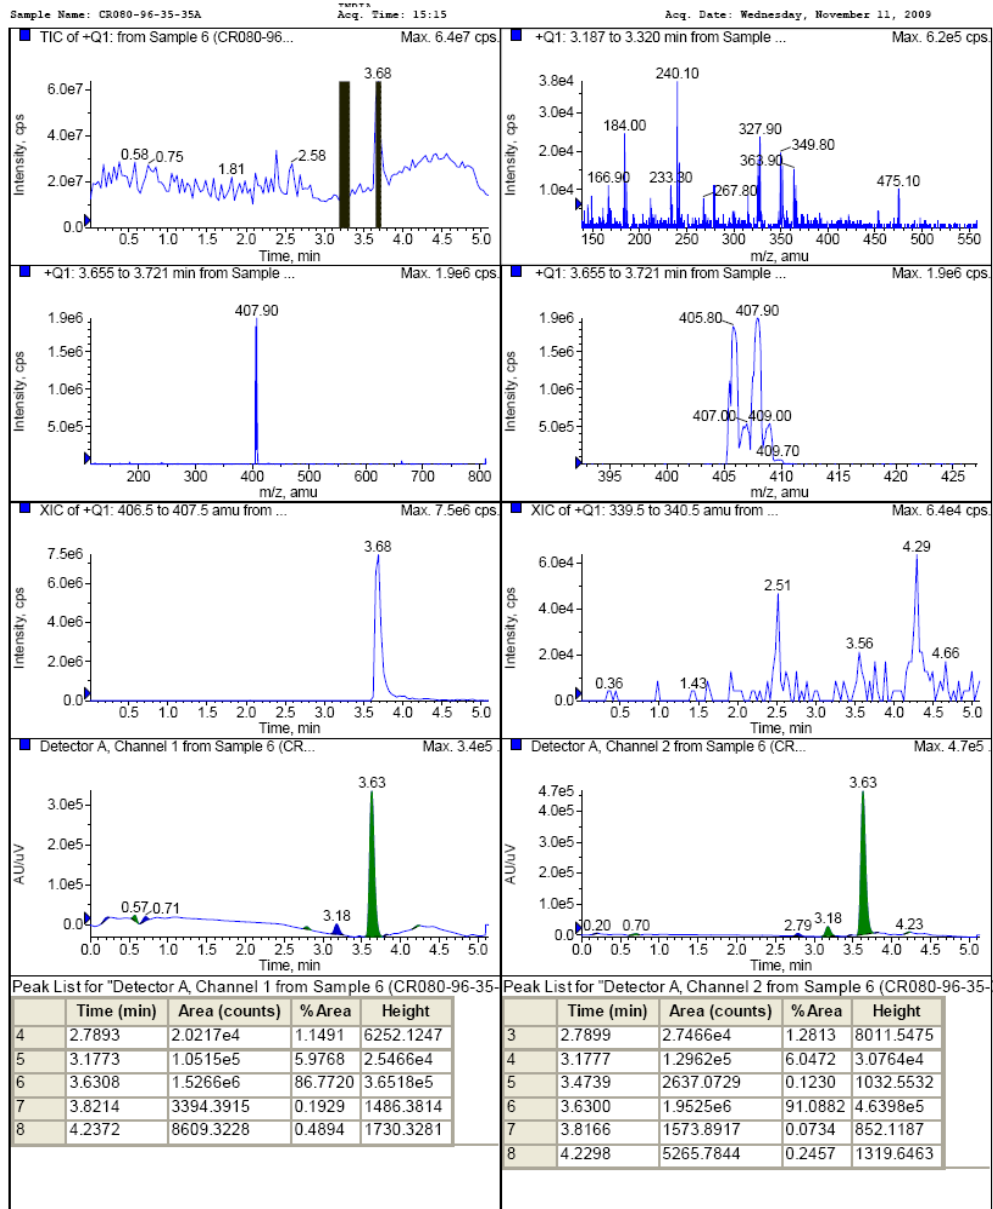

```

=====
SAMPLE: CR080-96-35-35 A
Column: GEMINI-C18(250X4.6)mm 5µ
Injection date : Fri, 5. Mar. 2010          Location   : Vial 13
Sample Name    : CR080-96-35-35 A          Inj. No.   : 1
Acq Operator   : BHUSHAN                   Inj. Vol.  : 10 µl
Analysis Method : C:\CHEM32\2\METHODS\UPLC_GENARAL_GRAD_1.M
Last Changed   : Sun, 7. Mar. 2010,
Acq. Method    : C:\Chem32\2\DATA\MAR-10\050310E 2010-03-05 16-35-20\
                  UPLC_GENARAL_GRAD_1.M
Method ref     : NP/A0011/54
=====

```

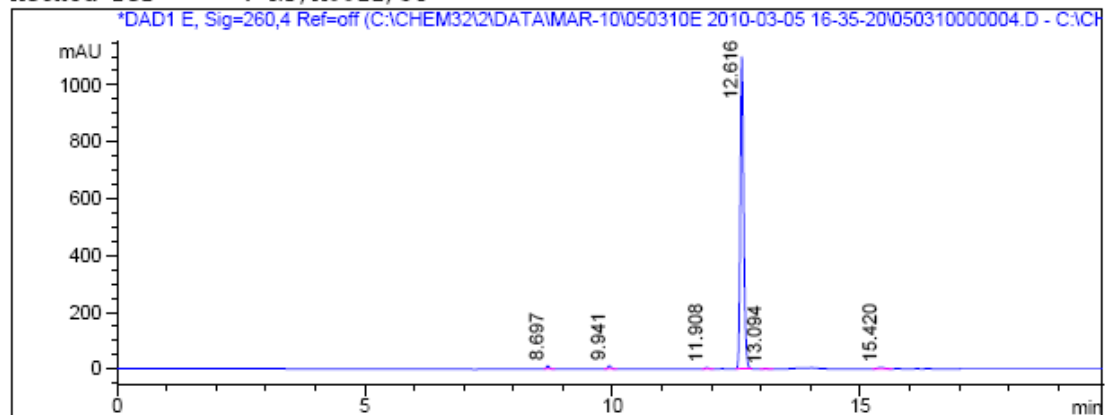

DAD1 E, Sig=260,4 Ref=off

| Peak # | RT (Min) | Width (Min) | Area    | Area % |
|--------|----------|-------------|---------|--------|
| 1      | 8.697    | 0.067       | 43.694  | 0.800  |
| 2      | 9.941    | 0.074       | 50.746  | 0.930  |
| 3      | 11.908   | 0.080       | 22.490  | 0.412  |
| 4      | 12.616   | 0.080       | 5.289e3 | 96.888 |
| 5      | 13.094   | 0.101       | 9.533   | 0.175  |
| 6      | 15.420   | 0.147       | 43.441  | 0.796  |

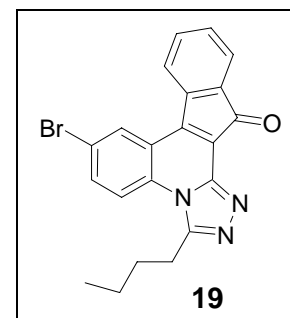

\*\*\* End of Report\*\*\*

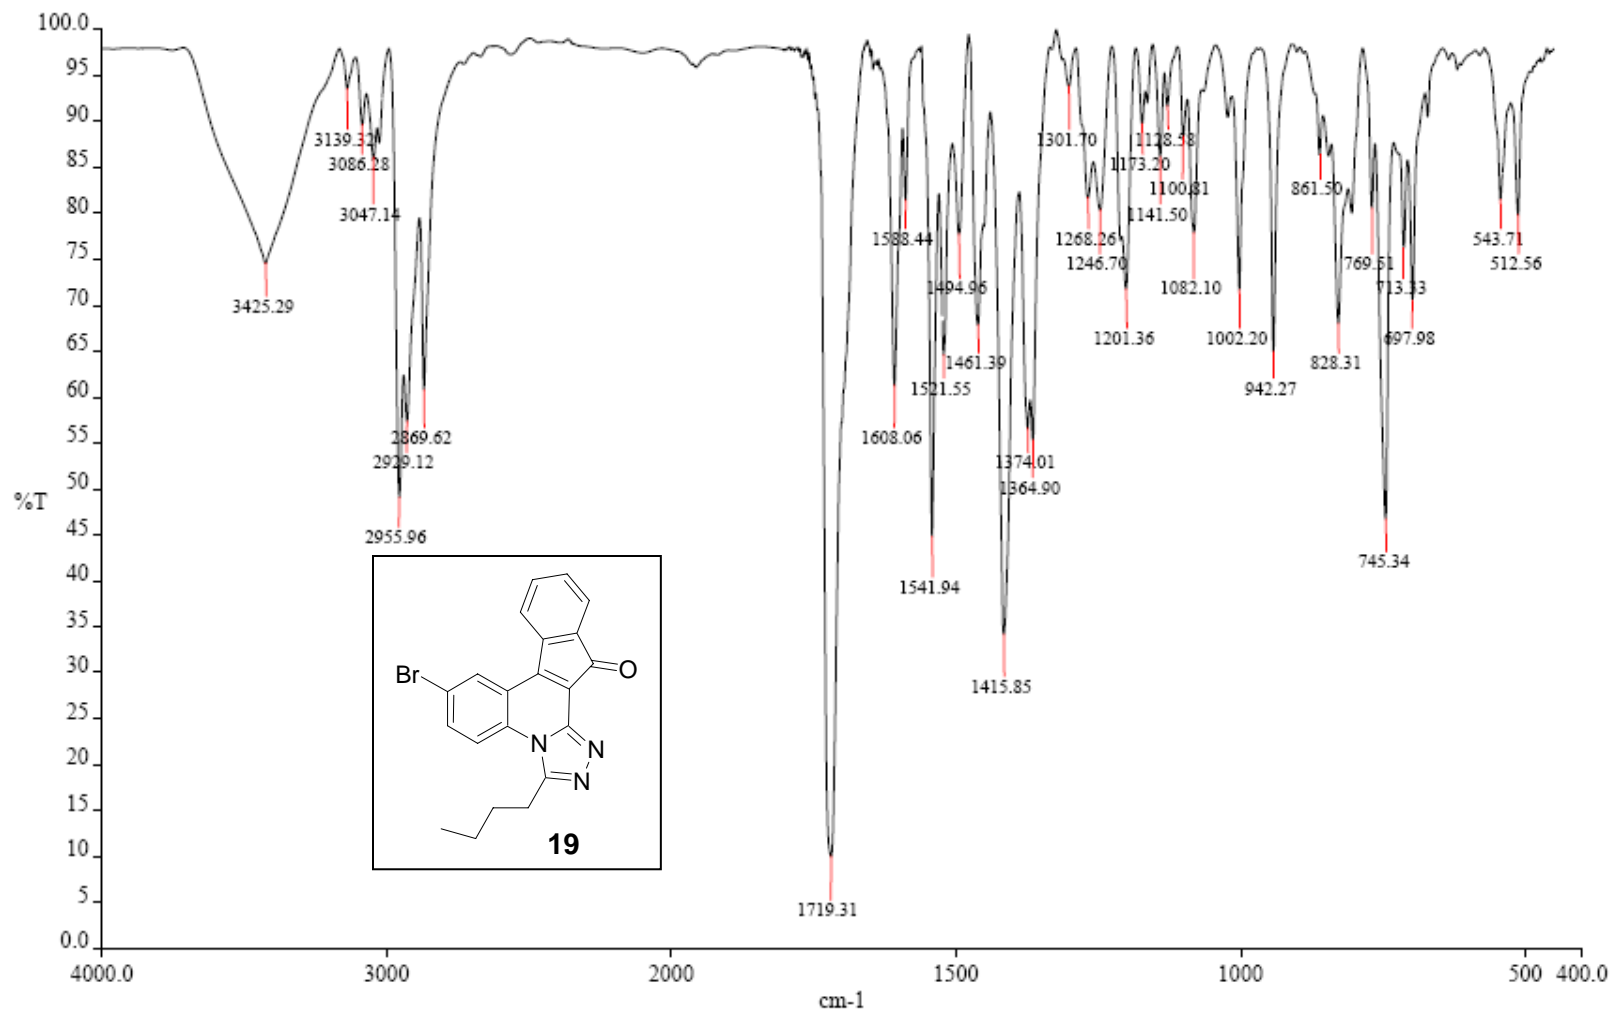

Spectrum Name: CR080-96-35-35A.sp

Analyst: GANESH

Accumulations: 16

Time: 10:18:07 AM

Description: CR080-96-35-35A IN KBr

Resolution: 4.00 cm-1

Date: 2/10/2010

NAME CR080-86-101-101A1  
 EXPNO 1  
 PROCNO 1  
 Date\_ 20100127  
 Time 11.48  
 INSTRUM spect  
 PROBHD 5 mm DUL 13C-1  
 PULPROG zg30  
 TD 32768  
 SOLVENT CDCl3  
 NS 8  
 DS 0  
 SWH 8278.146 Hz  
 FIDRES 0.252828 Hz  
 AQ 1.8782372 sec  
 RG 812.7  
 DW 80.400 usec  
 DE 8.00 usec  
 TE 282.7 K  
 D1 3.00000000 sec  
 TD0 1  
 ===== CHANNEL f1 =====  
 NUC1 1H  
 P1 12.60 usec  
 PL1 -1.00 dB  
 SFO1 400.1324710 MHz  
 Z1 16884  
 SF 400.1300128 MHz  
 WDW EM  
 SSB 0  
 LB 0.30 Hz  
 GB 0  
 PC 0.60

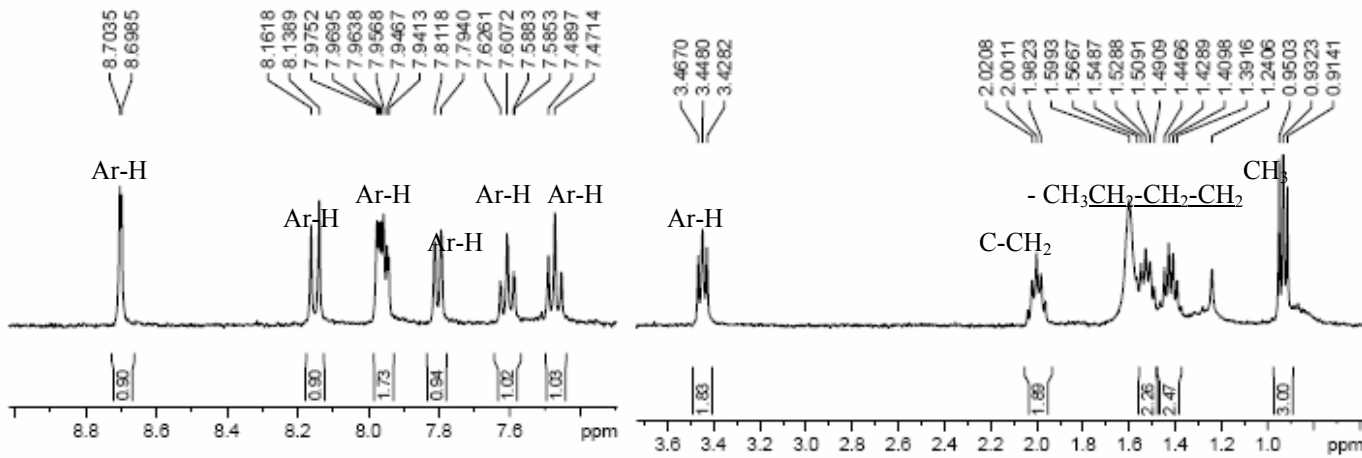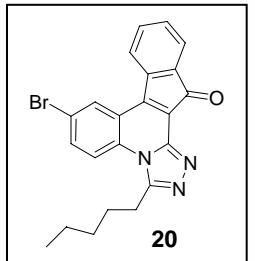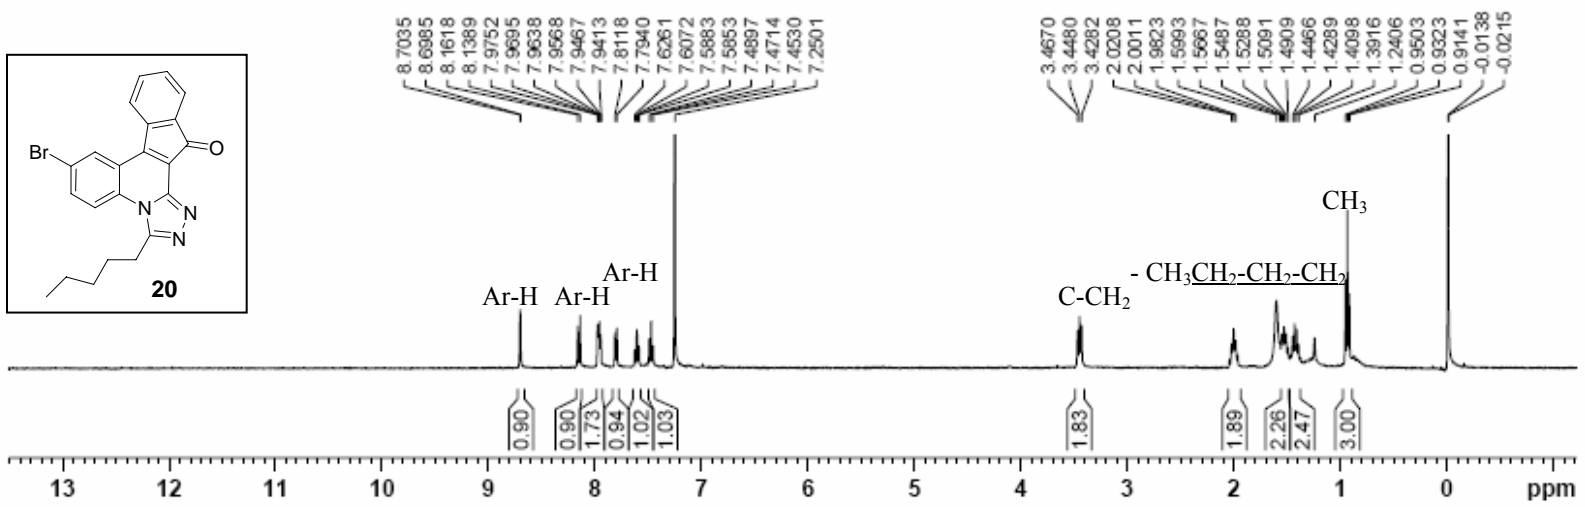

NAME CR080-88-101-101A1  
 EXPNO 1  
 PROCNO 1  
 Date\_ 20100307  
 Time 16.38  
 INSTRUM spect  
 PROBHD 6 mm DUL 13C-1  
 PULPROG zgpg30  
 TD 86536  
 SOLVENT TFA  
 NS 12000  
 DS 4  
 SWH 23860.814 Hz  
 FIDRES 0.385518 Hz  
 AQ 1.3884768 sec  
 RG 3848.1  
 DW 20.850 usec  
 DE 8.00 usec  
 TE 302.4 K  
 D1 2.00000000 sec  
 d11 0.03000000 sec  
 DELTA 1.88888888 sec  
 TD0 1

===== CHANNEL f1 =====  
 NUC1 13C  
 P1 7.80 usec  
 PL1 -2.00 dB  
 SFO1 100.6228288 MHz

===== CHANNEL f2 =====  
 CPDPRG2 waltz16  
 NUC2 1H  
 PCPD2 100.00 usec  
 PL2 -1.00 dB  
 PL12 14.82 dB  
 PL13 18.82 dB  
 SFO2 400.1518006 MHz  
 S1 32788  
 S2 100.8126128 MHz  
 WDW EM  
 SSB 0  
 LB 8.00 Hz  
 GB 0  
 PC 0.20

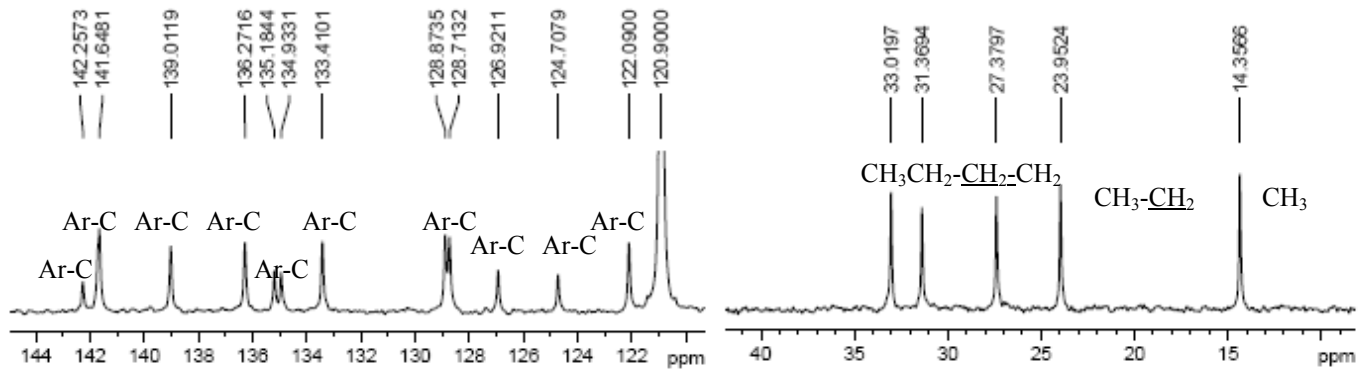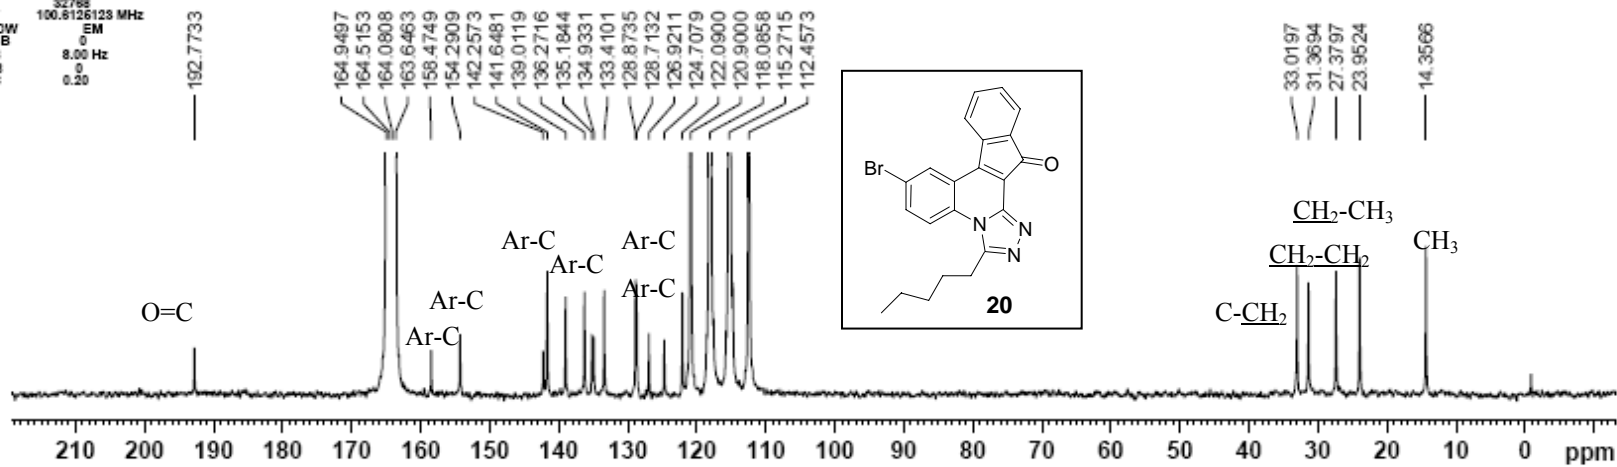

NAME CR00-06-101-101A1  
 EXPNO 2  
 PROCNO 1  
 Date\_ 20100308  
 Time 0.24  
 INSTRUM spect  
 PROBHD 5 mm DUL 13C-1  
 PULPROG zgpg30  
 TD 65536  
 SOLVENT TJA  
 NS 8000  
 DS 4  
 SWH 23985.814 Hz  
 FIDRES 0.328918 Hz  
 AQ 1.3864756 sec  
 RG 9189.2  
 DW 23.350 usec  
 DE 6.00 usec  
 TE 301.7 K  
 CNST2 145.0000000  
 D1 2.0000000 sec  
 d2 0.00044000 sec  
 d12 0.0000000 sec  
 DELTA 0.00000995 sec  
 TD0 1

\*\*\*\*\* CHANNEL f1 \*\*\*\*\*  
 NUC1 13C  
 P1 7.00 usec  
 P2 19.00 usec  
 PL1 -2.00 dB  
 SFO1 100.6228238 MHz

\*\*\*\*\* CHANNEL f2 \*\*\*\*\*  
 CPDPRG2 waltz16  
 NUC2 1H  
 P3 12.50 usec  
 P4 28.00 usec  
 PCPD2 100.00 usec  
 PL2 -1.00 dB  
 PL12 14.92 dB  
 SFO2 400.1516006 MHz  
 SI 32768  
 SF 100.6125119 MHz  
 WDW EM  
 SSB 0  
 LB 3.00 Hz  
 GB 0  
 PC 0.20

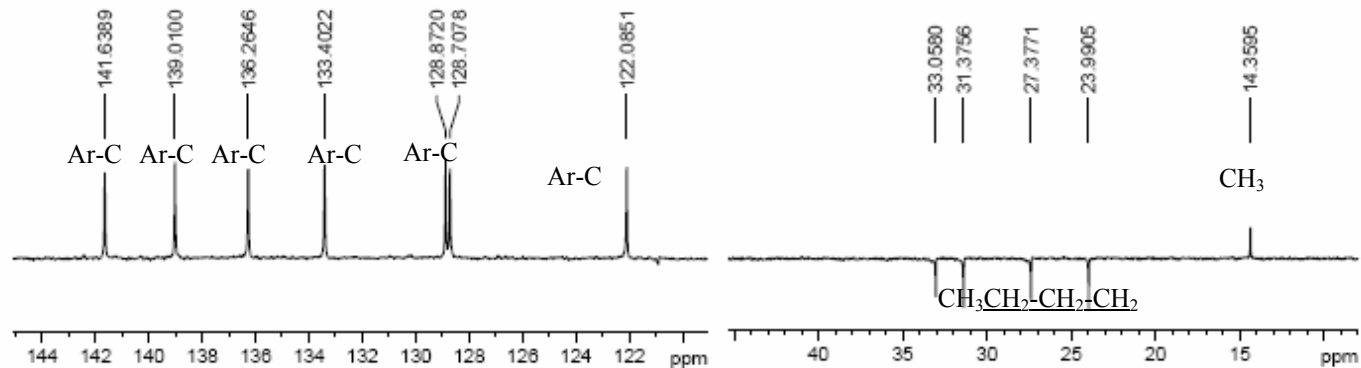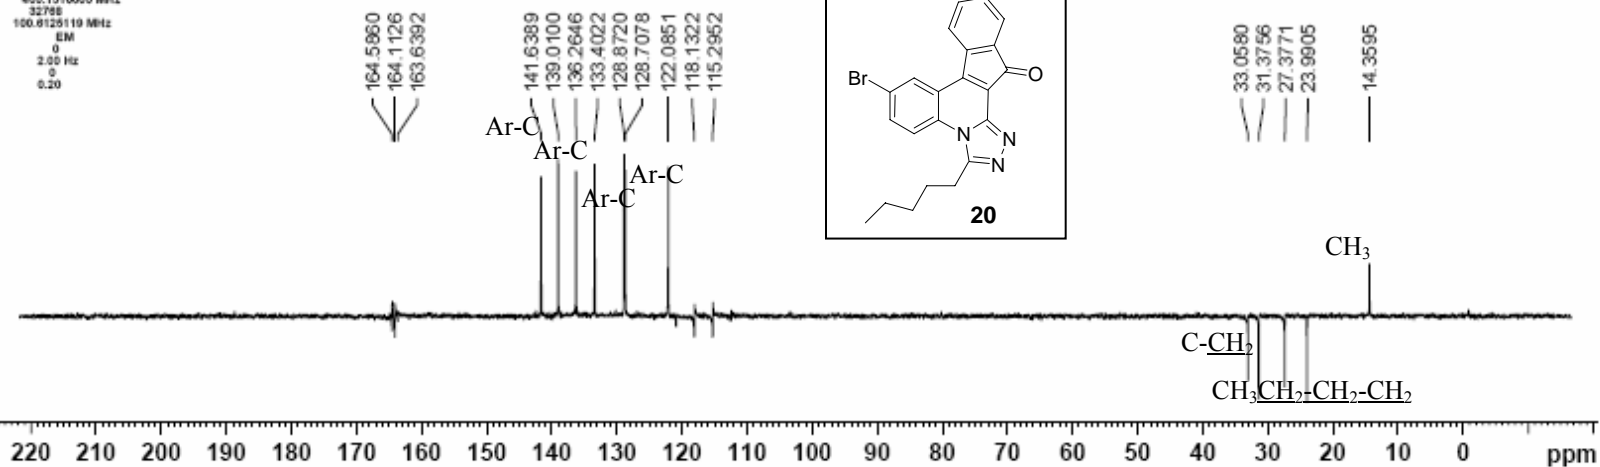



\*

Sample Name: CR080-96-101-101A1

INDIA  
Acq. Time: 13:11

Acq. Date: Wednesday, January 27, 2010

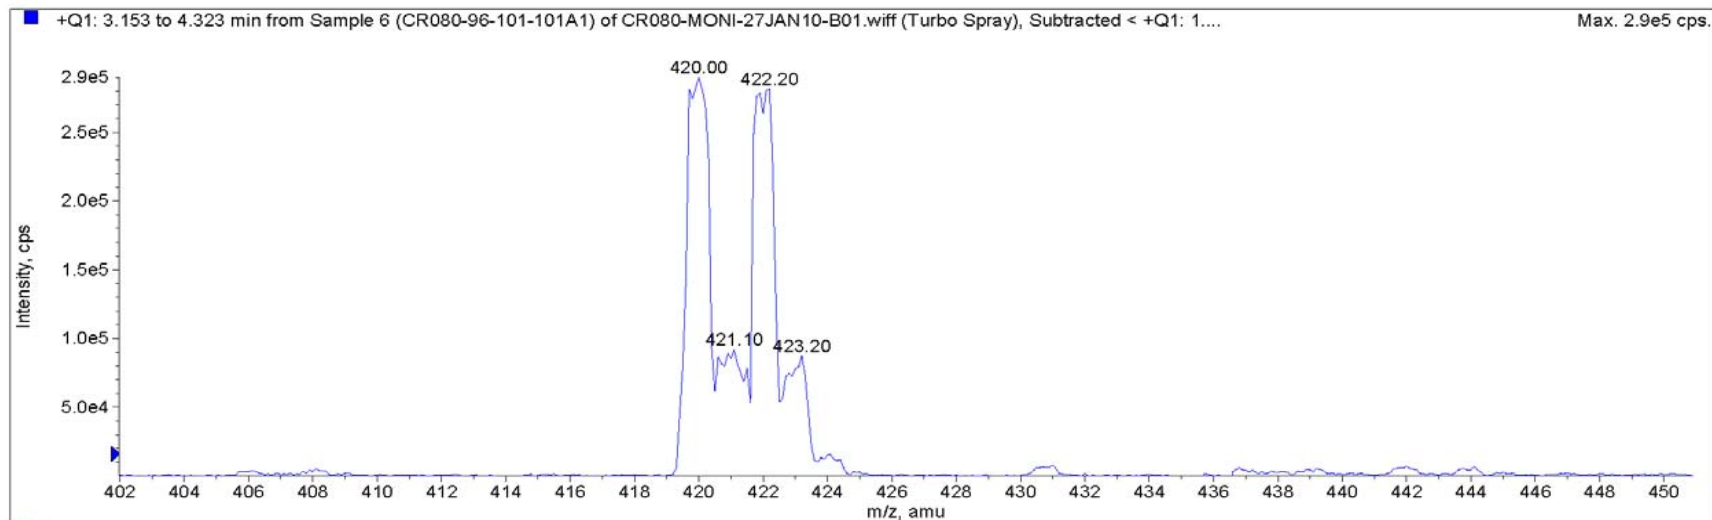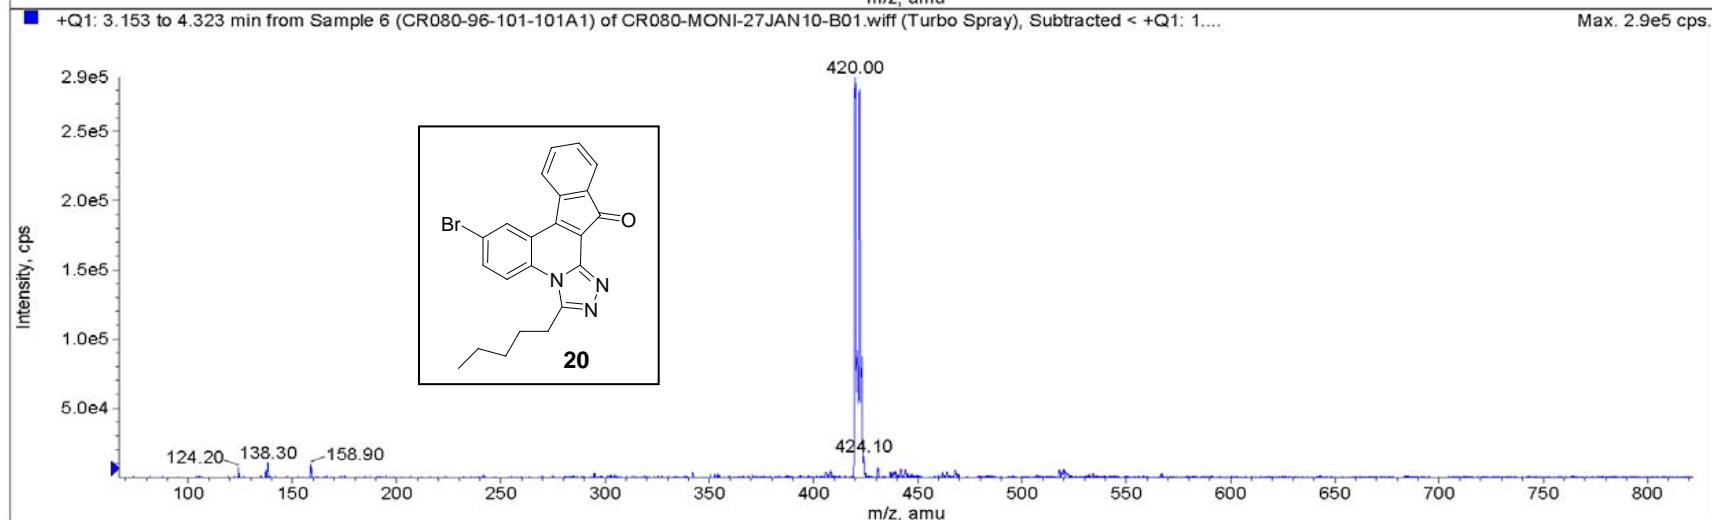

\*Sample Comment: [M+H] 420

Expected

\*\*Analyzed By :

\*\*Checked By :

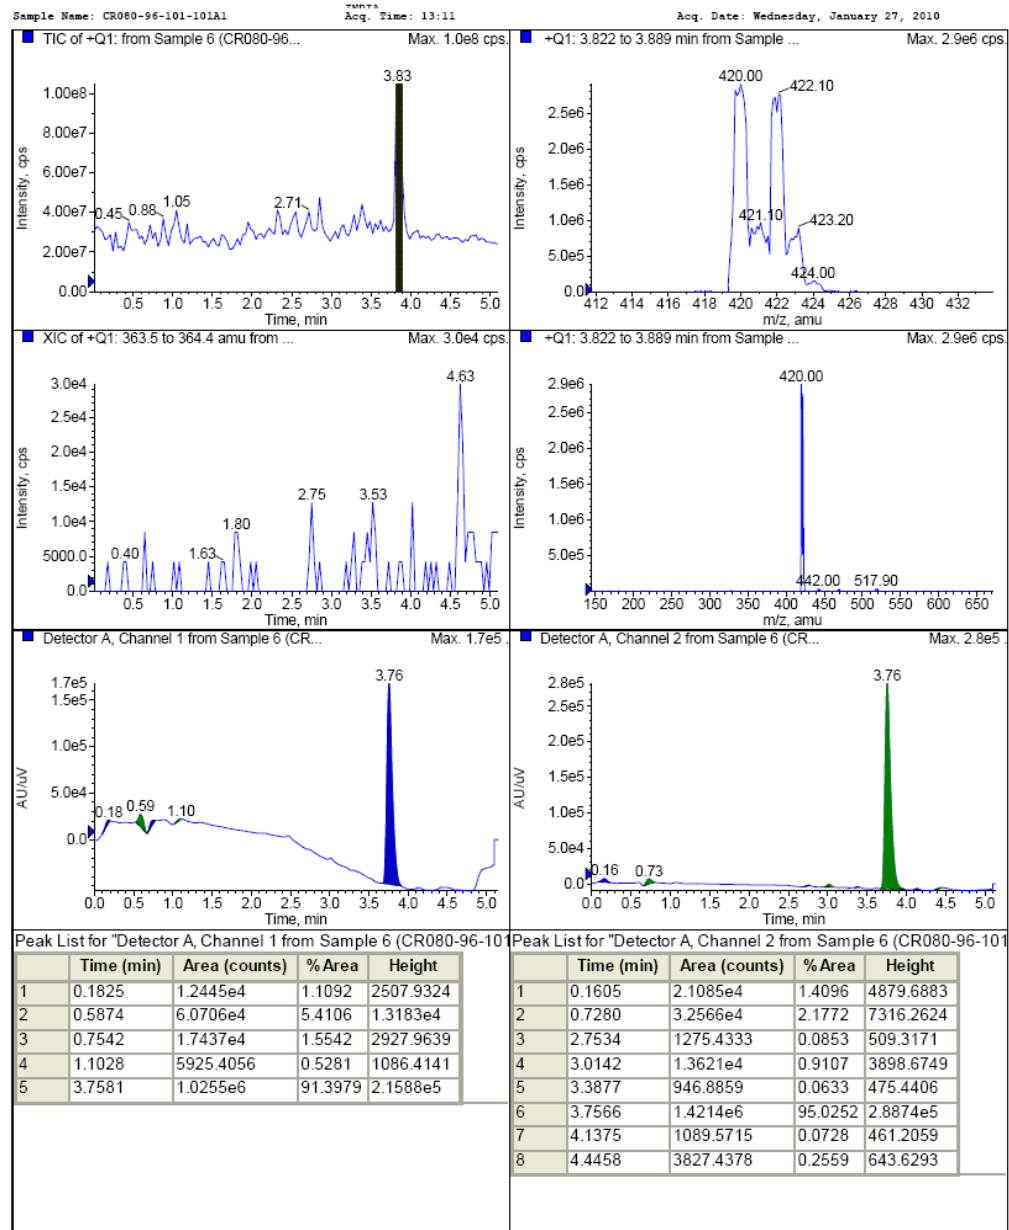

Sample Name : CR080-96-101-101A1  
 Sample ID : CR080-96-101-101A1  
 Column : Gemini C-18 (50 x 4.6 mm) 5u  
 Vial# : 47  
 Inj. Volume : 8 uL  
 Tray # : 2  
 Acquired by : AVINASH

Data File Name : 05031019.lcd  
 Method File Name : GENERAL-A.lcm  
 Batch File Name : 050310.lcb  
 Data Acquired : 3/5/2010 3:59:20 PM  
 Data Processed : 3/5/2010 4:11:24 PM  
 Ref.No.:NP/A0011/52

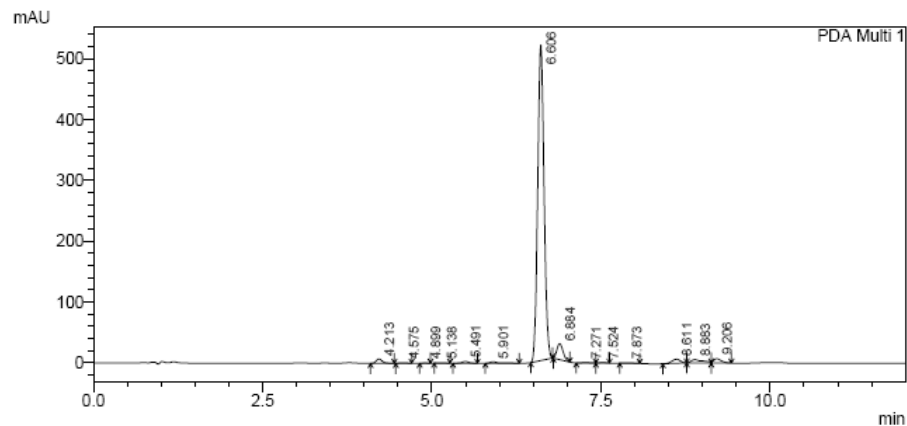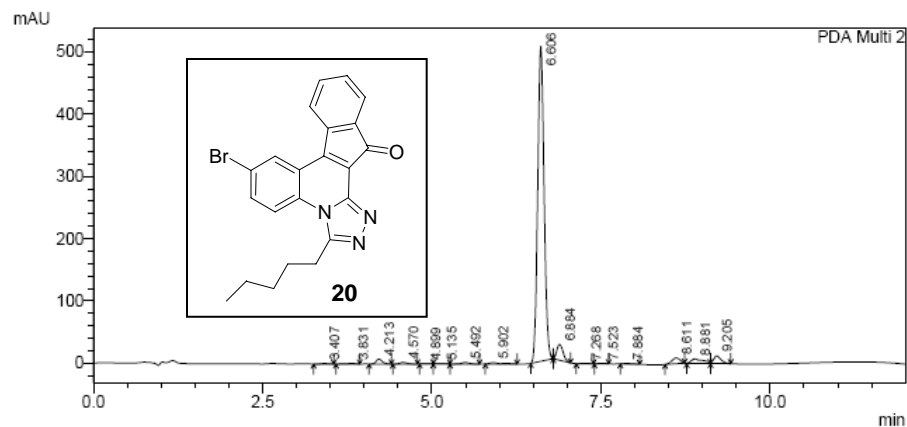

1 PDA Multi 1/263nm 4nm  
 2 PDA Multi 2/244nm 4nm

PeakTable

PDA Ch1 263nm 4nm

| Peak# | Ret. Time | Area    | Area % | Height |
|-------|-----------|---------|--------|--------|
| 1     | 4.21      | 45077   | 1.17   | 7223   |
| 2     | 4.57      | 5288    | 0.14   | 779    |
| 3     | 4.90      | 1369    | 0.04   | 246    |
| 4     | 5.14      | 5182    | 0.13   | 833    |
| 5     | 5.49      | 20524   | 0.53   | 2897   |
| 6     | 5.90      | 21766   | 0.57   | 2319   |
| 7     | 6.61      | 3377885 | 87.96  | 519168 |
| 8     | 6.88      | 165707  | 4.31   | 26200  |
| 9     | 7.27      | 4079    | 0.11   | 623    |
| 10    | 7.52      | 5512    | 0.14   | 937    |
| 11    | 7.87      | 6584    | 0.17   | 604    |
| 12    | 8.61      | 56892   | 1.48   | 6625   |
| 13    | 8.88      | 69056   | 1.80   | 5559   |
| 14    | 9.21      | 55366   | 1.44   | 7054   |
| Total |           | 3840286 | 100.00 | 581066 |

PeakTable

PDA Ch2 244nm 4nm

| Peak# | Ret. Time | Area    | Area % | Height |
|-------|-----------|---------|--------|--------|
| 1     | 3.41      | 5474    | 0.14   | 968    |
| 2     | 3.83      | 7299    | 0.19   | 715    |
| 3     | 4.21      | 48642   | 1.25   | 7842   |
| 4     | 4.57      | 17775   | 0.46   | 2652   |
| 5     | 4.90      | 1554    | 0.04   | 306    |
| 6     | 5.13      | 4286    | 0.11   | 726    |
| 7     | 5.49      | 19027   | 0.49   | 2623   |
| 8     | 5.90      | 24325   | 0.63   | 2313   |
| 9     | 6.61      | 3308844 | 85.22  | 506293 |
| 10    | 6.88      | 161467  | 4.16   | 25504  |
| 11    | 7.27      | 4317    | 0.11   | 664    |
| 12    | 7.52      | 5705    | 0.15   | 973    |
| 13    | 7.88      | 8033    | 0.21   | 859    |
| 14    | 8.61      | 77998   | 2.01   | 9379   |
| 15    | 8.88      | 93792   | 2.42   | 7424   |
| 16    | 9.21      | 94113   | 2.42   | 12453  |
| Total |           | 3882650 | 100.00 | 581695 |

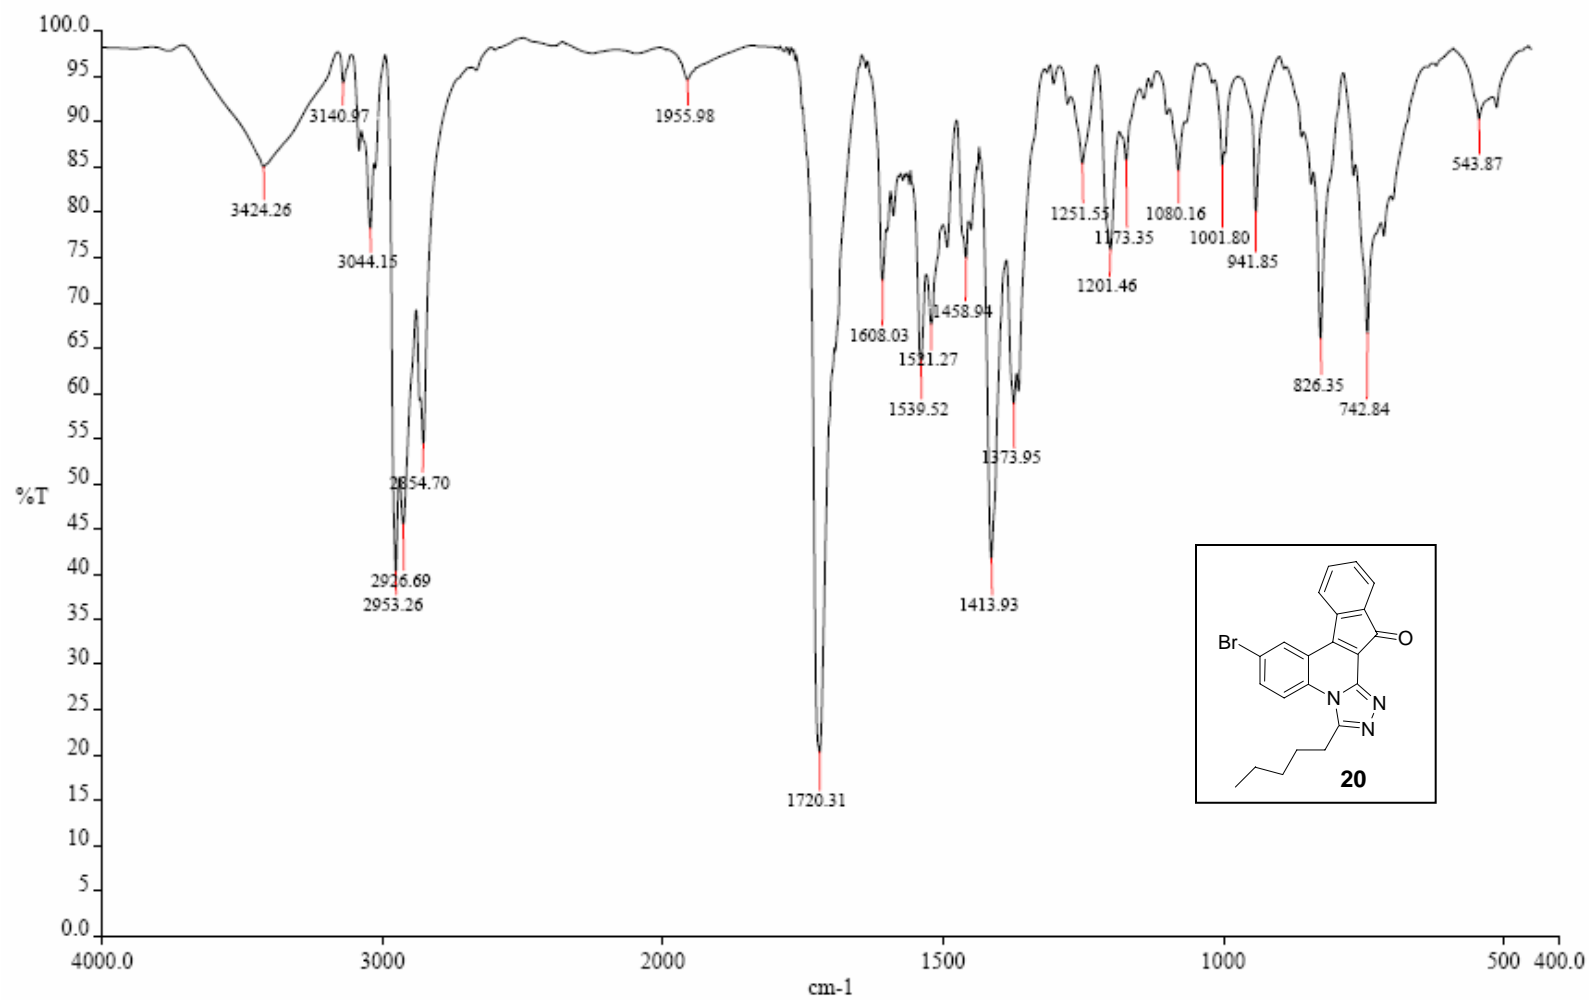

Spectrum Name: CR080-96-101-101A1.sp

Analyst: GANESH

Accumulations: 16

Time: 10:02:49 AM

Description: CR080-96-101-101A1 IN KBr

Resolution: 4.00 cm-1

Date: 2/10/2010

Current Data Parameters  
 NAME CR080-96-97-97A  
 EXPNO 1  
 PROCNO 1

F2 - Acquisition Parameters  
 Date\_ 20100114  
 Time 16.39  
 INSTRUM spect  
 PROBHD 5 mm DUL 13C-1  
 PULPROG zg30  
 TD 32768  
 SOLVENT CDCl3  
 NS 16  
 DS 0  
 SWH 8278.146 Hz  
 FIDRES 0.252629 Hz  
 AQ 1.9792372 sec  
 RG 574.7  
 DW 60.400 usec  
 DE 6.09 usec  
 TE 292.8 K  
 D1 3.0000000 sec  
 TD0 1

===== CHANNEL f1 =====  
 NUC1 1H  
 P1 12.50 usec  
 PL1 -1.00 dB  
 SFO1 400.1324710 MHz

F2 - Processing parameters  
 SI 16384  
 SF 400.1300129 MHz  
 WDW EM  
 SSB 0  
 LB 0.30 Hz  
 GB 0  
 PC 0.50

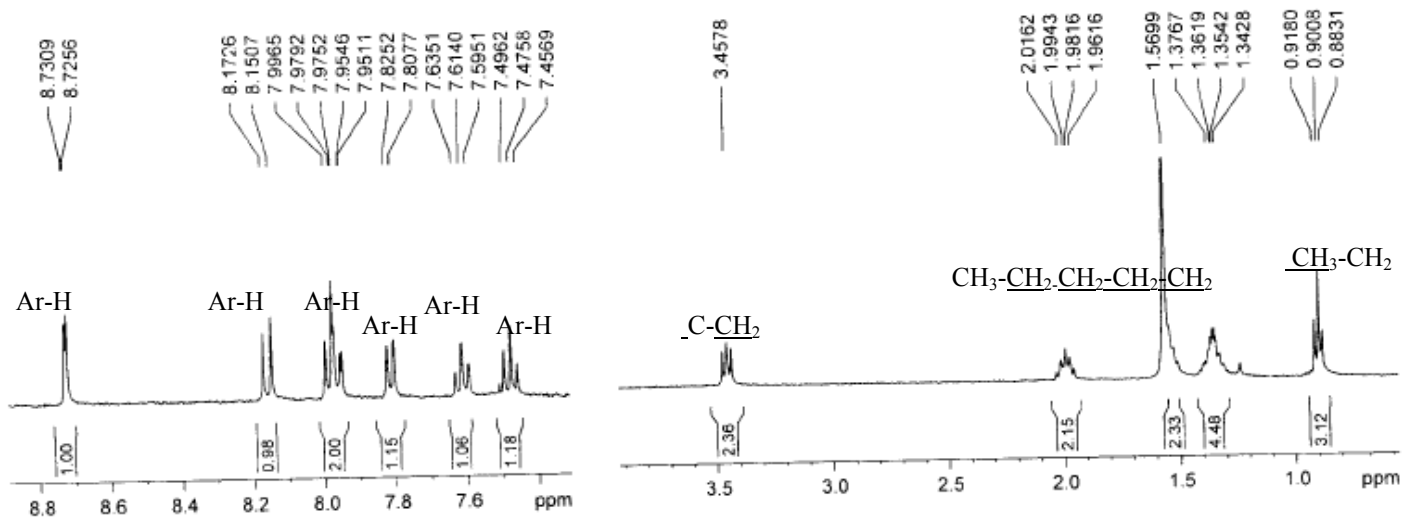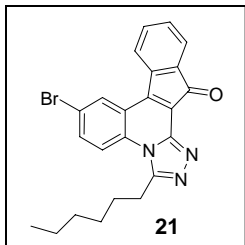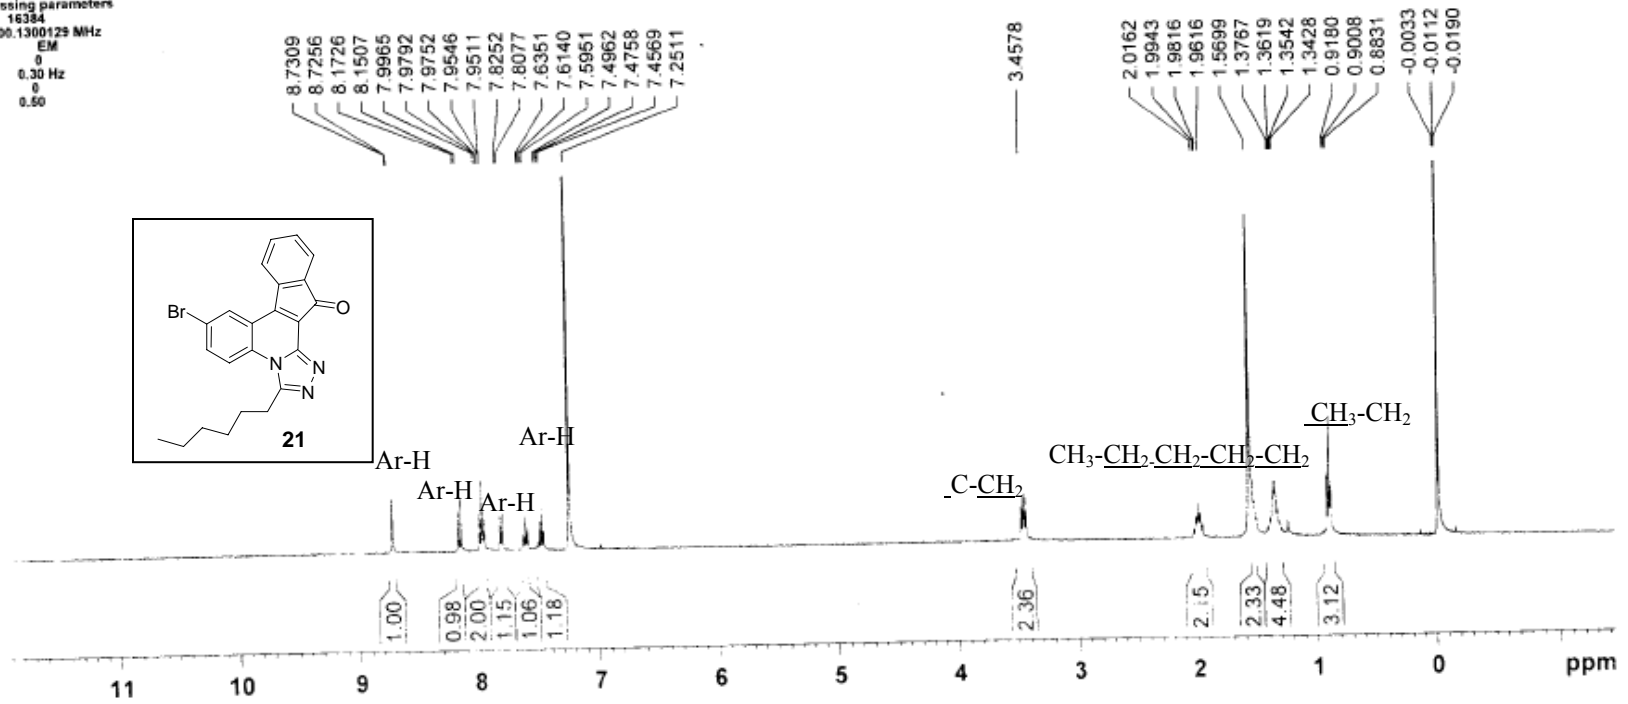

```

NAME CR080-88-87-87A
EXPNO 1
PROCNO 1
Date_ 20100208
Time 12.36
INSTRUM spect
PROBHD 6 mm DUL 13C-1
PULPROG zgpg30
TD 86536
SOLVENT CDCl3
NS 800
DS 4
SWH 23886.814 Hz
FIDRES 0.386518 Hz
AQ 1.3884769 sec
RG 10321.3
DW 20.850 usec
DE 3.00 usec
TE 293.2 K
D1 2.00000000 sec
d11 0.03000000 sec
DELTA 1.8888888 sec
TD0 1

===== CHANNEL f1 =====
NUC1 13C
P1 7.80 usec
PL1 -2.00 dB
SFO1 100.6228298 MHz

===== CHANNEL f2 =====
CPCPRG2 waltz16
NUC2 1H
PCPD2 100.00 usec
PL2 -1.00 dB
PL12 14.82 dB
PL13 18.82 dB
SFO2 400.1518006 MHz
SI 32785
SF 100.6127748 MHz
WDW EM
SSB 0
LB 8.00 Hz
GB 0
PC 0.20

```

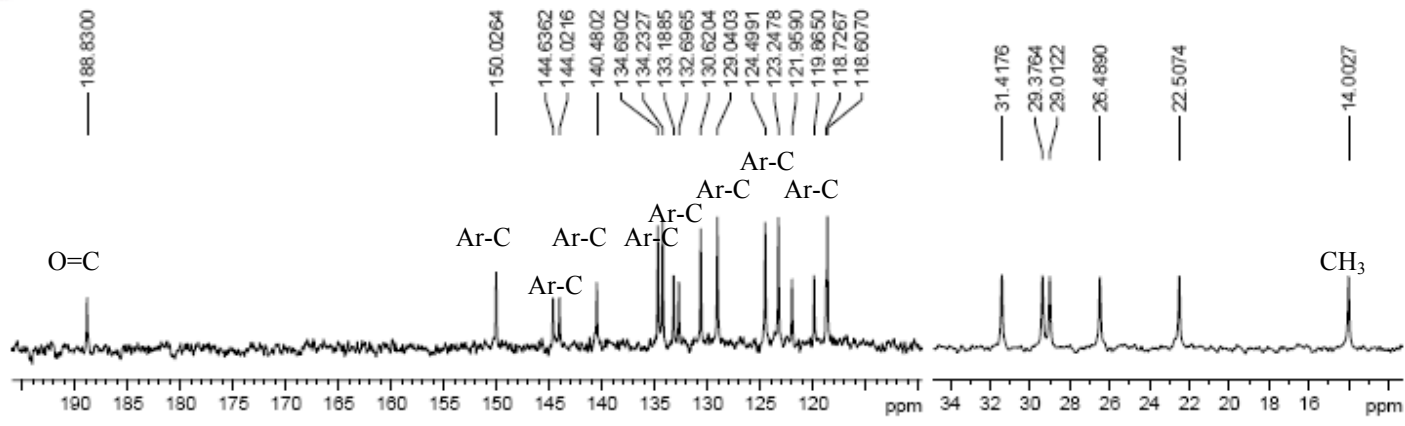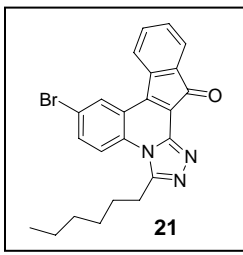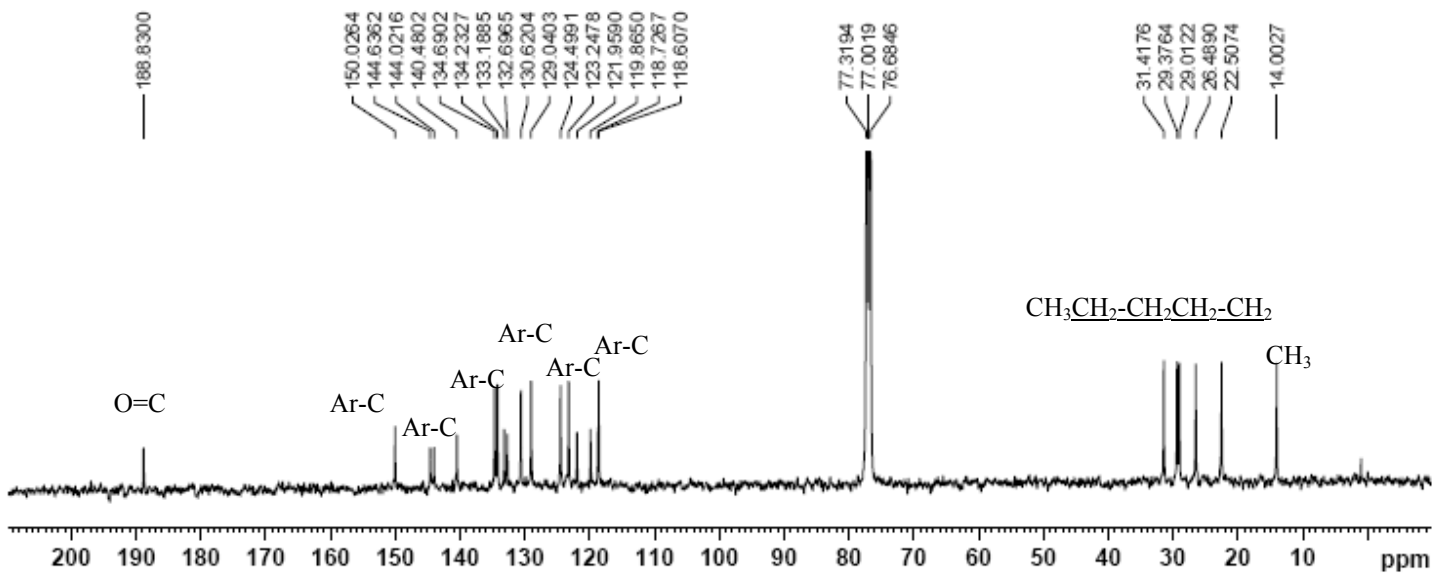

NAME CR000-08-07A  
 EXPNO 2  
 PROCNO 1  
 Date\_ 20100208  
 Time 13.01  
 INSTRUM spect  
 PROBHD 5 mm DUL 13C-1  
 PULPROG dept135  
 TD 66528  
 SOLVENT CDCl3  
 NS 800  
 DS 4  
 SWH 20985.014 Hz  
 FIDRES 0.395910 Hz  
 AQ 1.5884750 sec  
 RG 13054  
 DW 20.850 usec  
 DE 5.00 usec  
 TE 293.1 K  
 CNST2 145.000000  
 D1 2.0000000 sec  
 d2 0.00044028 sec  
 d12 0.00000000 sec  
 DELTA 0.00000995 sec  
 TDO 1

\*\*\*\*\* CHANNEL f1 \*\*\*\*\*  
 NUC1 13C  
 P1 7.00 usec  
 p2 15.00 usec  
 PL1 -2.00 dB  
 SFO1 100.6228290 MHz

\*\*\*\*\* CHANNEL f2 \*\*\*\*\*  
 CPDPRG2 waltz16  
 NUC2 1H  
 P3 12.50 usec  
 p4 25.00 usec  
 PCPD2 100.00 usec  
 PL2 -1.00 dB  
 PL12 14.92 dB  
 SFO2 400.1318000 MHz  
 SI 32766  
 SF 100.6127750 MHz  
 WDW EM  
 SSB 0  
 LB 8.00 Hz  
 GB 0  
 PC 0.20

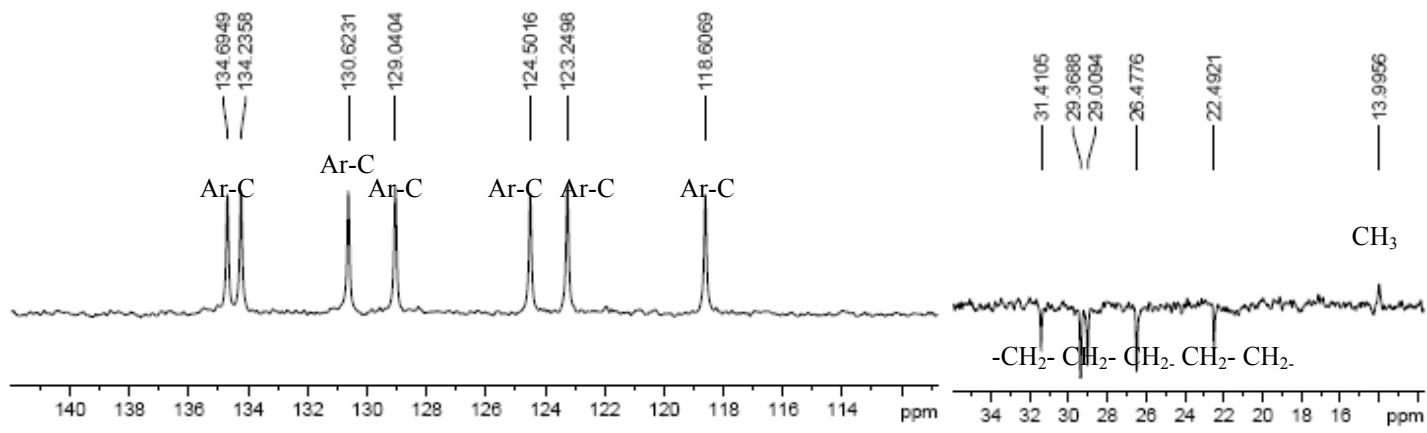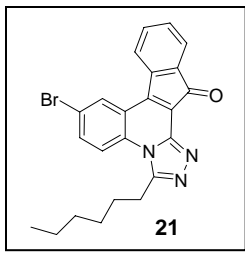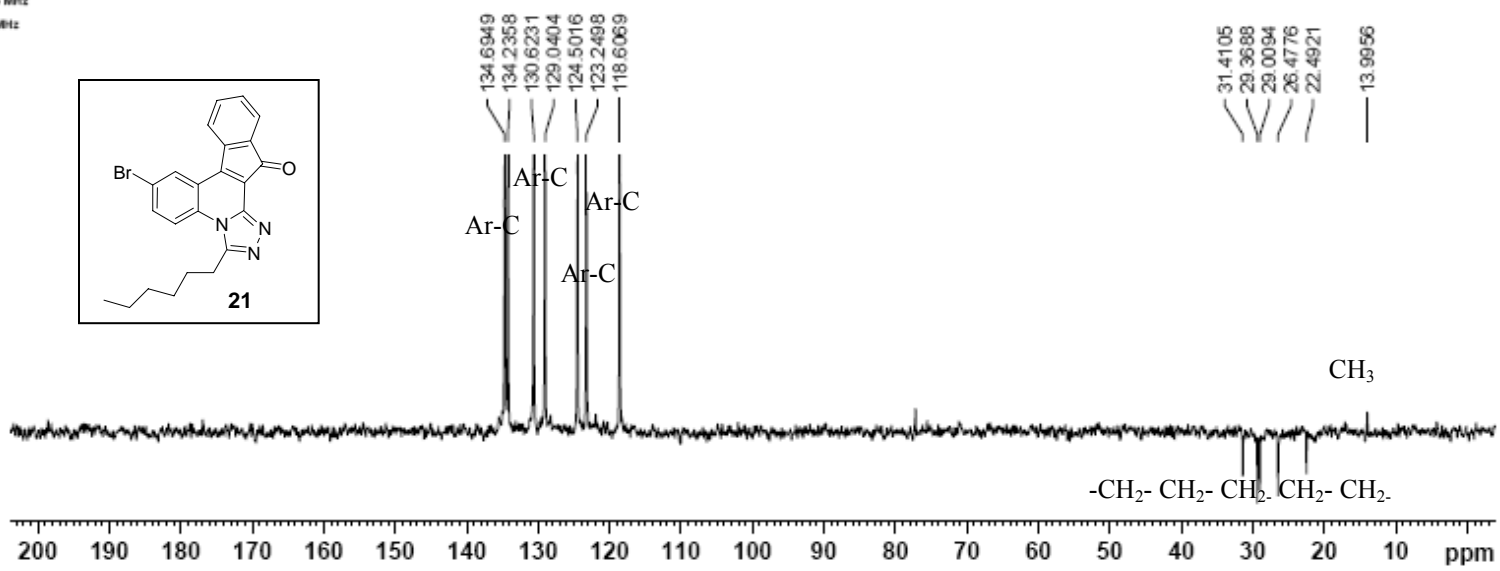

\*

Sample Name: CR080-96-97-97A

INDIA  
Acq. Time: 10:00

Acq. Date: Friday, January 15, 2010

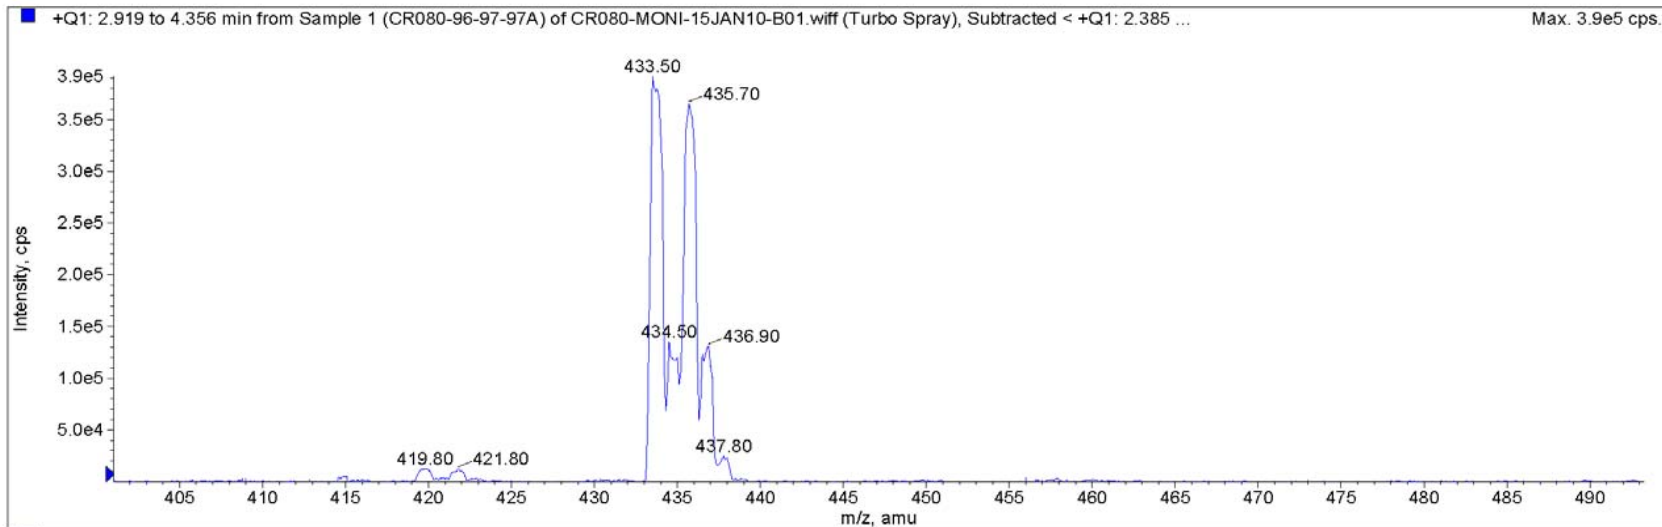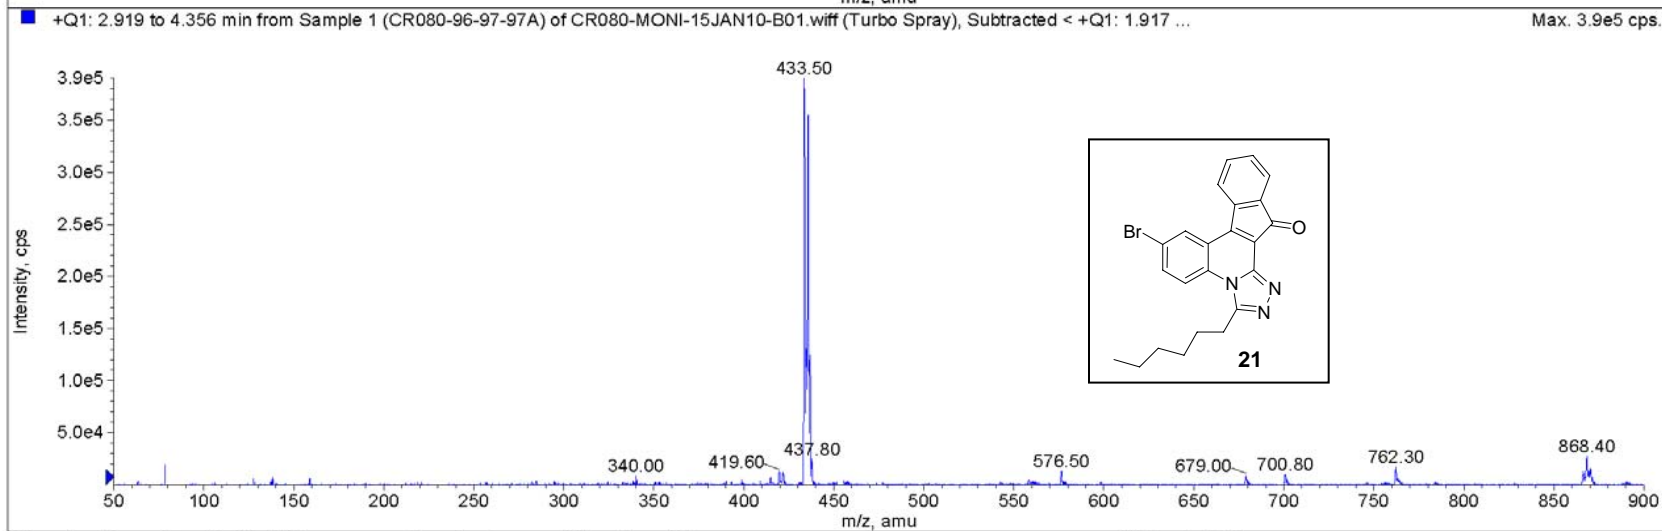

\*Sample Comment: [M+H] 434

Expected

\*\*Analyzed By :

\*\*Checked By :



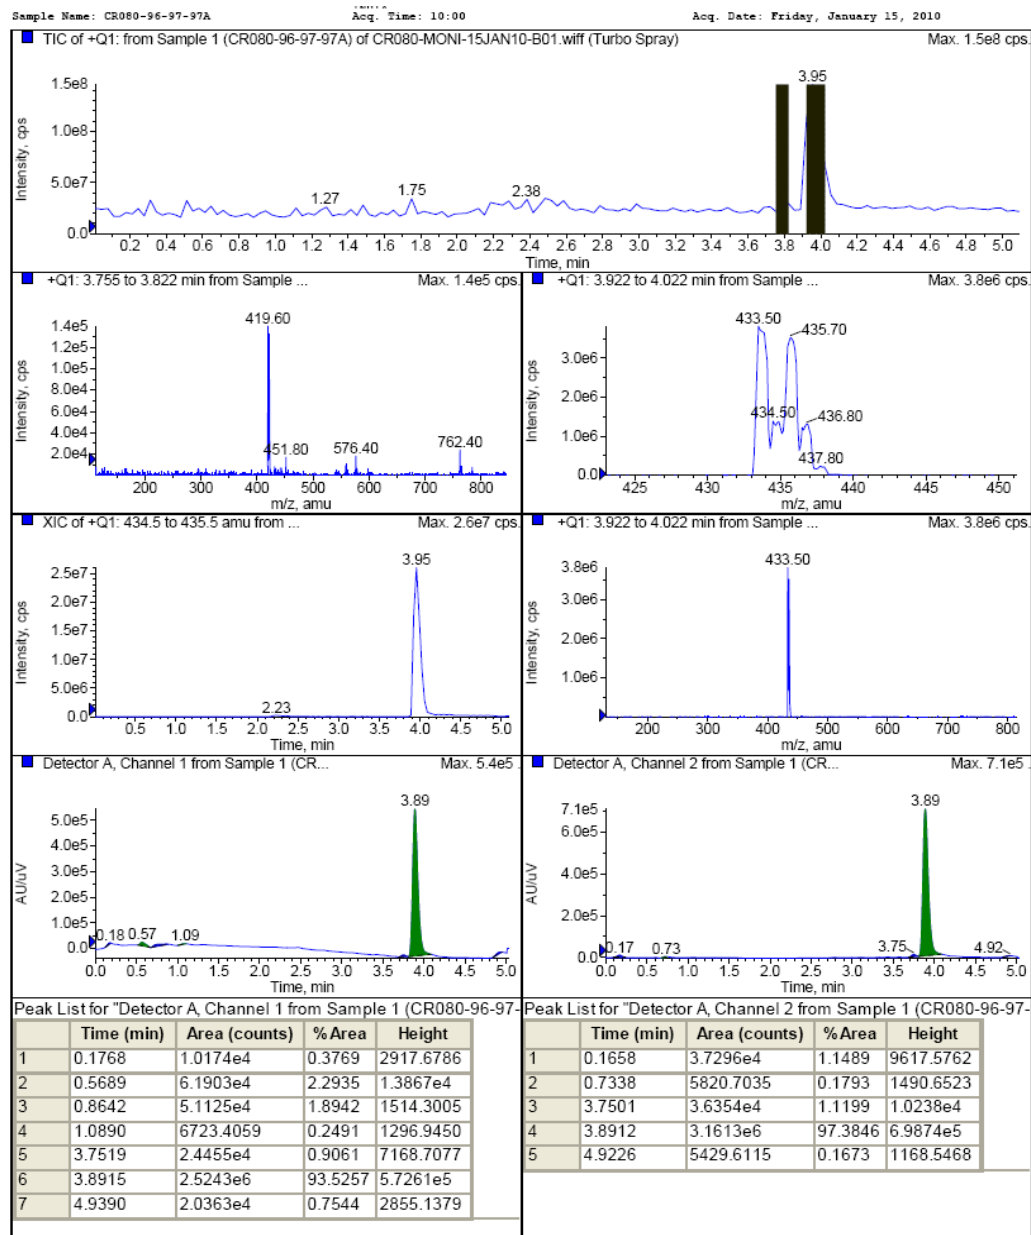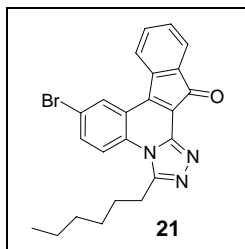

LCMS-1 REACH MONI (TFA Buffer)  
Channel 1 at wavelength 220nm, Channel 2 at wavelength 260 nm

Analysed By :

Sample Name : CR080-96-97-97A  
 Sample ID : CR080-96-97-97A  
 Column : Gemini C-18 (50 x 4.6 mm) 5u  
 Vial # : 49  
 Inj. Volume : 2 uL  
 Tray # : 2  
 Acquired by : AVINASH

Data File Name : 05031016.lcd  
 Method File Name : GENERAL.lcm  
 Batch File Name : 050310.lcb  
 Data Acquired : 3/5/2010 3:32:40 PM  
 Data Processed : 3/5/2010 3:45:28 PM  
 Ref.No.:NP/A0011/51

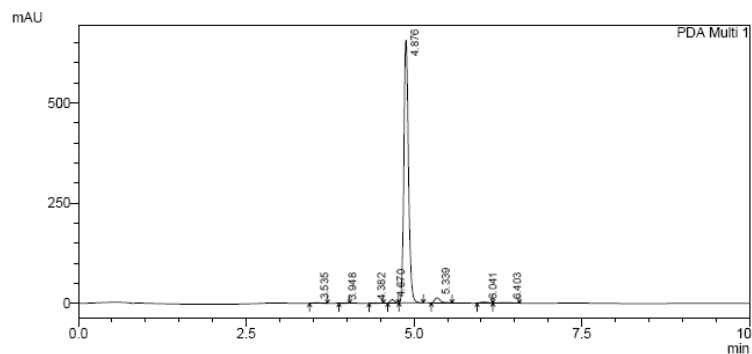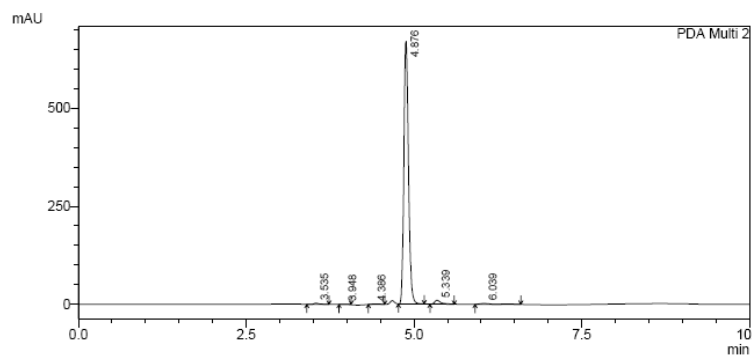

1 PDA Multi 1/244nm 4nm  
 2 PDA Multi 2/264nm 4nm

PDA Ch1 244nm 4nm  
 PeakTable

| Peak# | Ret. Time | Area    | Area % | Height |
|-------|-----------|---------|--------|--------|
| 1     | 3.54      | 6772    | 0.21   | 1513   |
| 2     | 3.95      | 1437    | 0.04   | 333    |
| 3     | 4.38      | 1527    | 0.05   | 235    |
| 4     | 4.67      | 37319   | 1.14   | 8574   |
| 5     | 4.88      | 3125584 | 95.32  | 655590 |
| 6     | 5.34      | 78146   | 2.38   | 12929  |
| 7     | 6.04      | 15889   | 0.48   | 2235   |
| 8     | 6.40      | 12322   | 0.38   | 1097   |
| Total |           | 3278996 | 100.00 | 682505 |

PDA Ch2 264nm 4nm  
 PeakTable

| Peak# | Ret. Time | Area    | Area % | Height |
|-------|-----------|---------|--------|--------|
| 1     | 3.54      | 12391   | 0.37   | 2841   |
| 2     | 3.95      | 1352    | 0.04   | 301    |
| 3     | 4.39      | 1919    | 0.06   | 262    |
| 4     | 4.88      | 3199471 | 96.64  | 670681 |
| 5     | 5.34      | 61963   | 1.87   | 9787   |
| 6     | 6.04      | 33620   | 1.02   | 2057   |
| Total |           | 3310716 | 100.00 | 685929 |

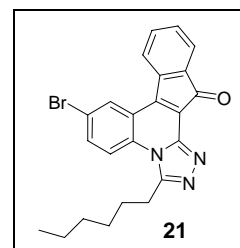

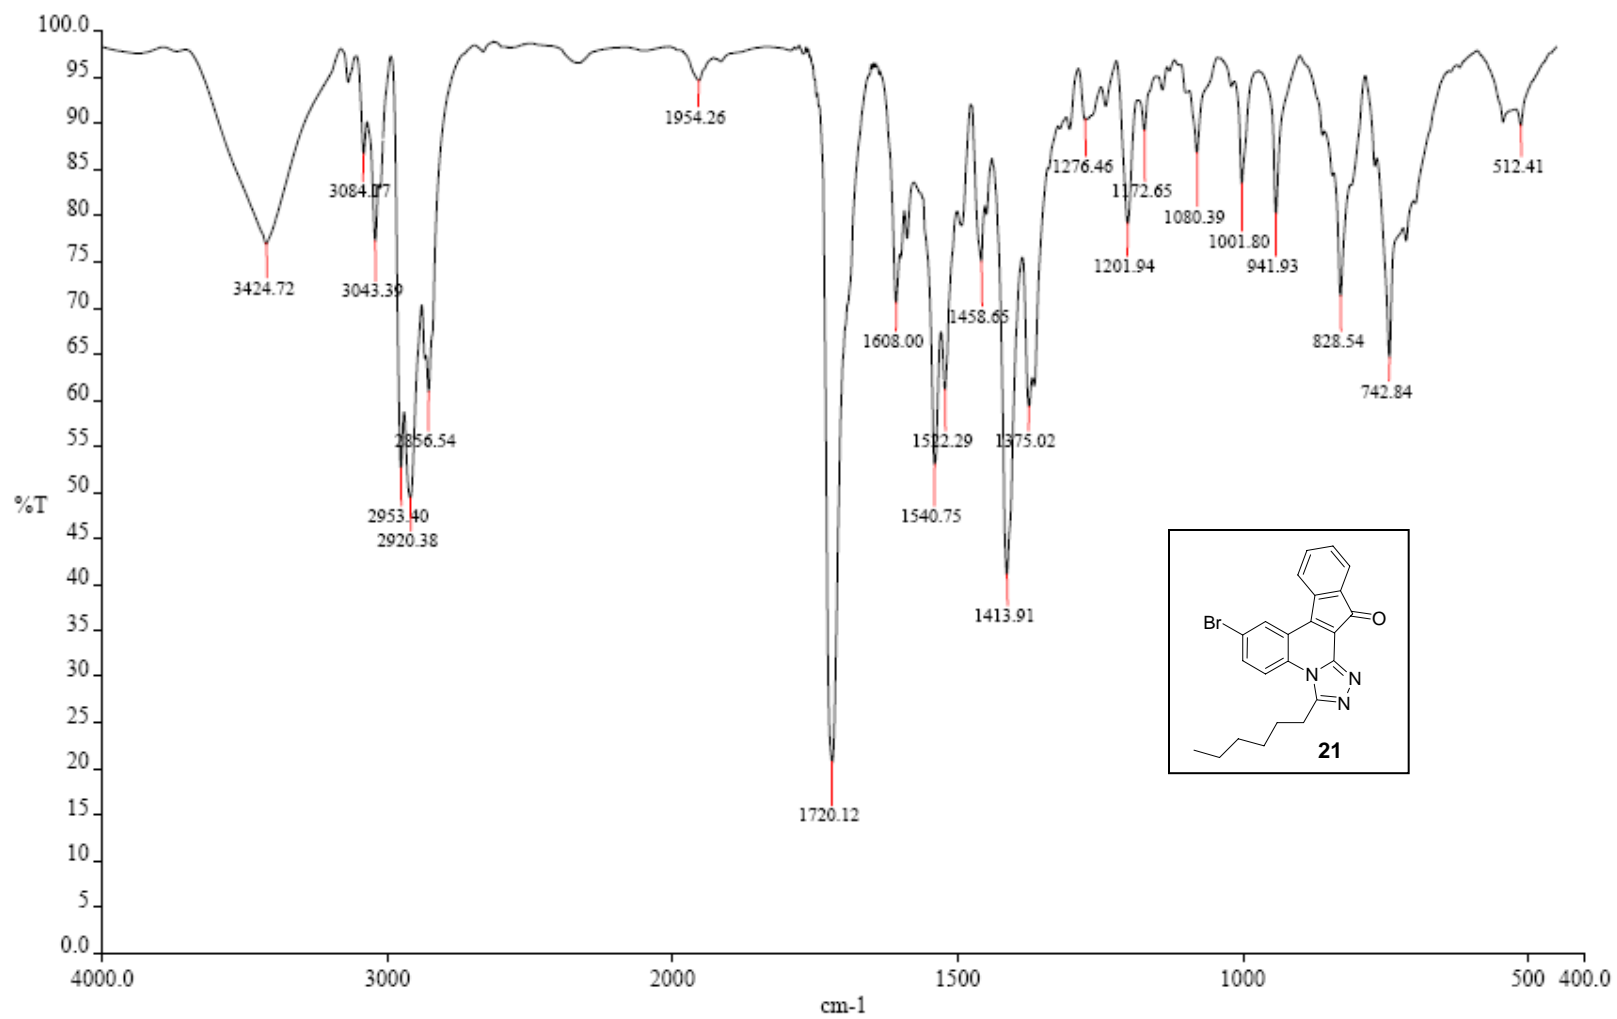

Spectrum Name: CR080-96-97-97A.sp

Analyst: GANESH

Accumulations: 16

Time: 12:19:02 PM

Description: CR080-96-97-97A IN KBr

Resolution: 4.00 cm<sup>-1</sup>

Date: 2/10/2010

NAME CR080-08-51-43B  
 EXPNO 1  
 PROCNO 1  
 Date\_ 20100105  
 Time 12.39  
 INSTRUM spect  
 PROBHD 5 mm DUL 13C-1  
 PULPROG zg30  
 TD 32788  
 SOLVENT DMF0  
 NS 24  
 DS 0  
 SWH 8278.148 Hz  
 FIDRES 0.252828 Hz  
 AQ 1.9782372 sec  
 RG 846.1  
 DW 80.400 usec  
 DE 8.00 usec  
 TE 293.0 K  
 D1 3.0000000 sec  
 TD0 1

===== CHANNEL f1 =====  
 NUC1 1H  
 P1 12.60 usec  
 PL1 -1.00 dB  
 SFO1 400.1324710 MHz  
 SI 18384  
 SF 400.1300021 MHz  
 WDW EM  
 SSB 0  
 LB 0.30 Hz  
 GB 0  
 PC 0.60

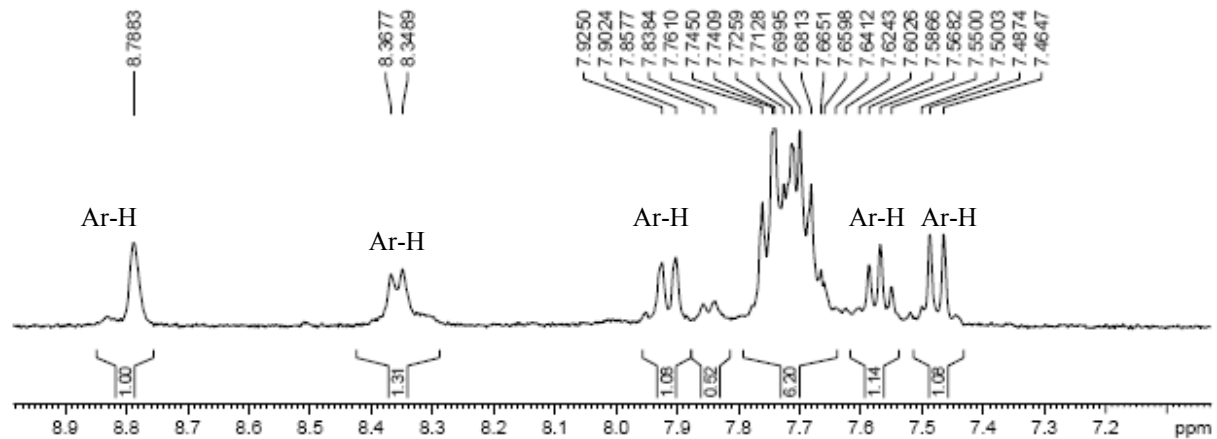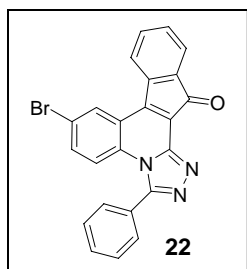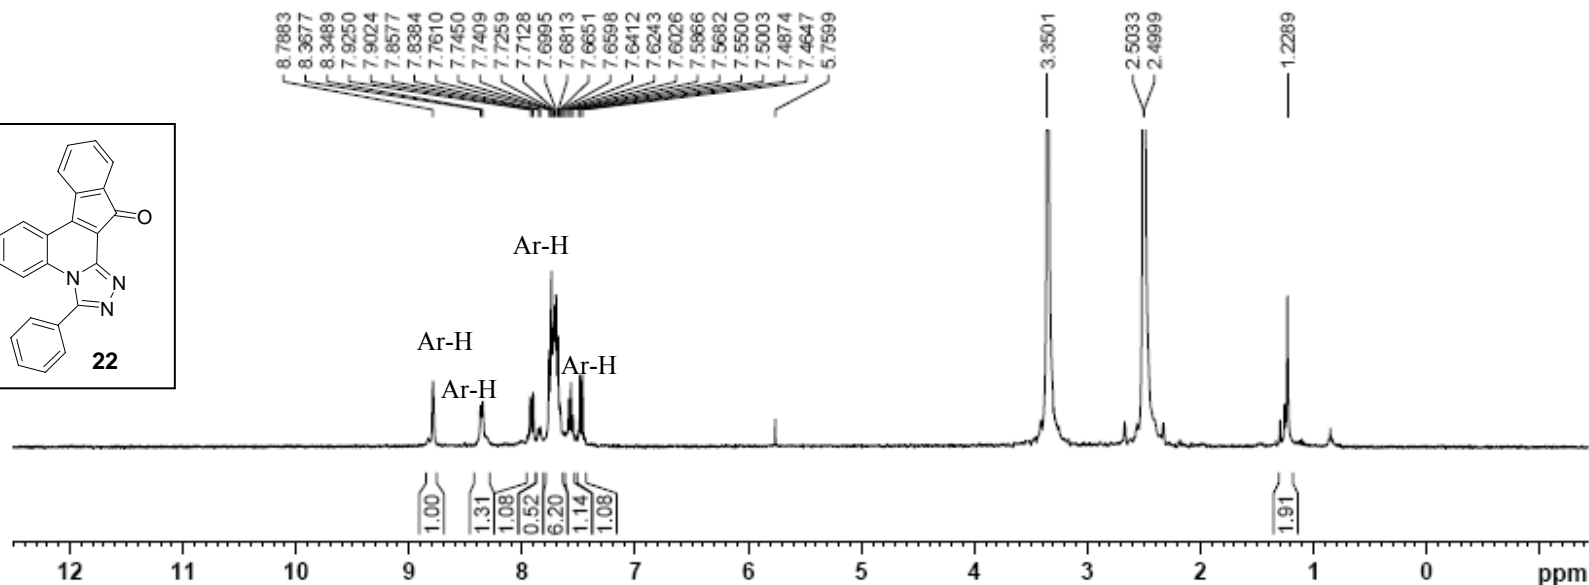

Current Data Parameters  
 NAME CR066-90-51-43B  
 EXPNO 1  
 PROCNO 1

F2 - Acquisition Parameters  
 Date\_ 20100327  
 Time 11:52  
 INSTRUM spect  
 PROBHD 5 mm QNP 13C-1  
 PULPROG zgpg30  
 TD 65536  
 SOLVENT TFA  
 NS 1989  
 DS 4  
 SWH 29980.814 Hz  
 FIDRES 0.385918 Hz  
 AQ 1.3864756 sec  
 RG 33170.5  
 DW 20.880 usec  
 DE 6.00 usec  
 TE 300.2 K  
 D1 2.00000000 sec  
 d11 0.03000000 sec  
 DELTA 1.80000000 sec  
 T06

----- CHANNEL f1 -----  
 NUC1 13C  
 P1 7.86 usec  
 PL1 -2.00 dB  
 SFO1 100.628359 MHz

----- CHANNEL f2 -----  
 CPDPRG2 waltz16  
 NUC2 1H  
 PCPD2 100.00 usec  
 PL2 -1.00 dB  
 PL3 14.82 dB  
 PL13 18.82 dB  
 SFO2 400.1319005 MHz

F2 - Processing parameters  
 SI 32768  
 SF 100.6113277 MHz  
 WDW EM  
 SSB 0  
 LB 6.00 Hz  
 GB 0  
 PC 0.20

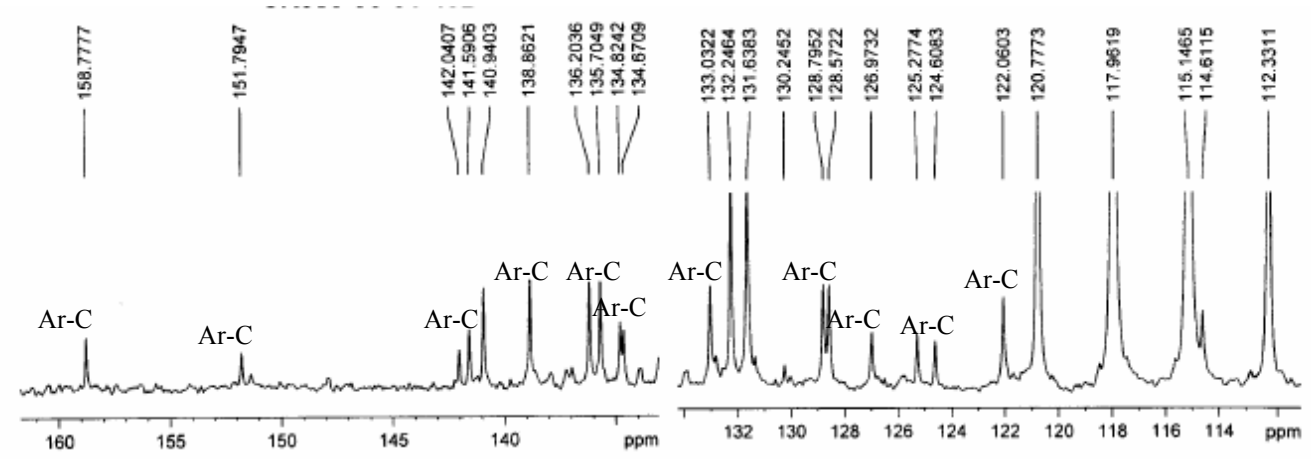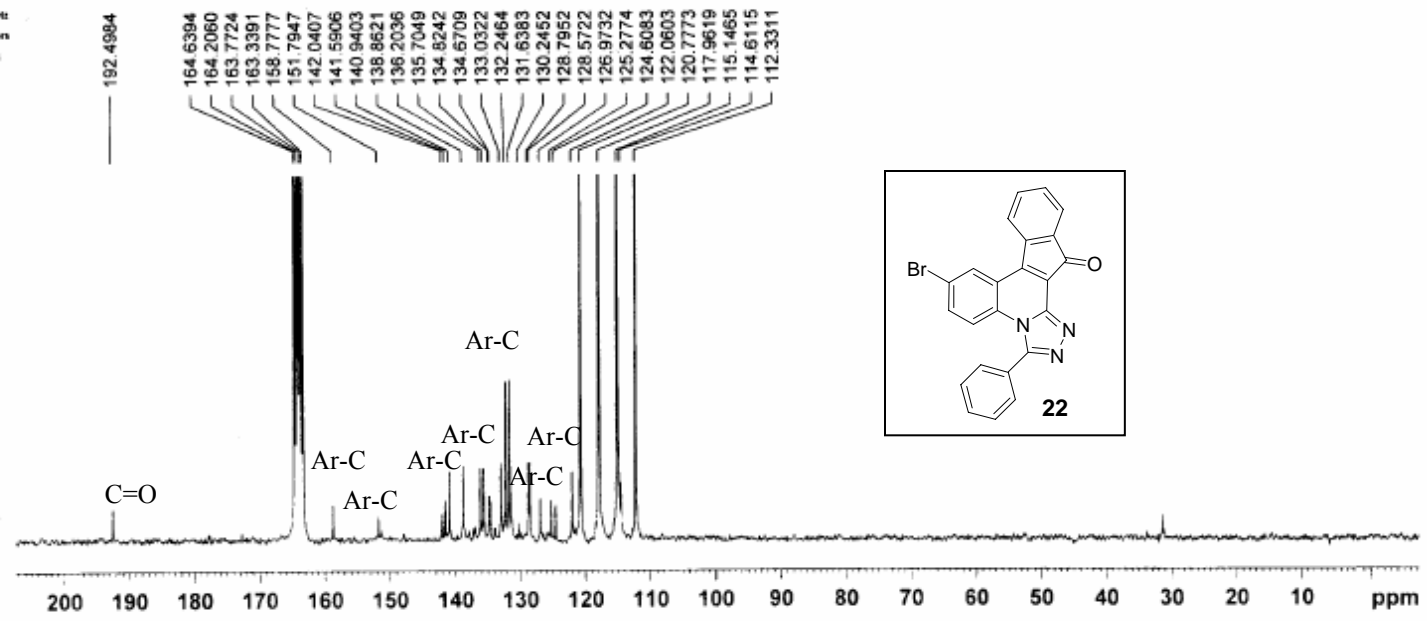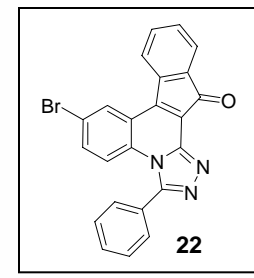

\*

INDIA  
Sample Name: CR080-96-51-43B Acq. Time: 10:31 Acq. Date: Monday, November 30, 2009

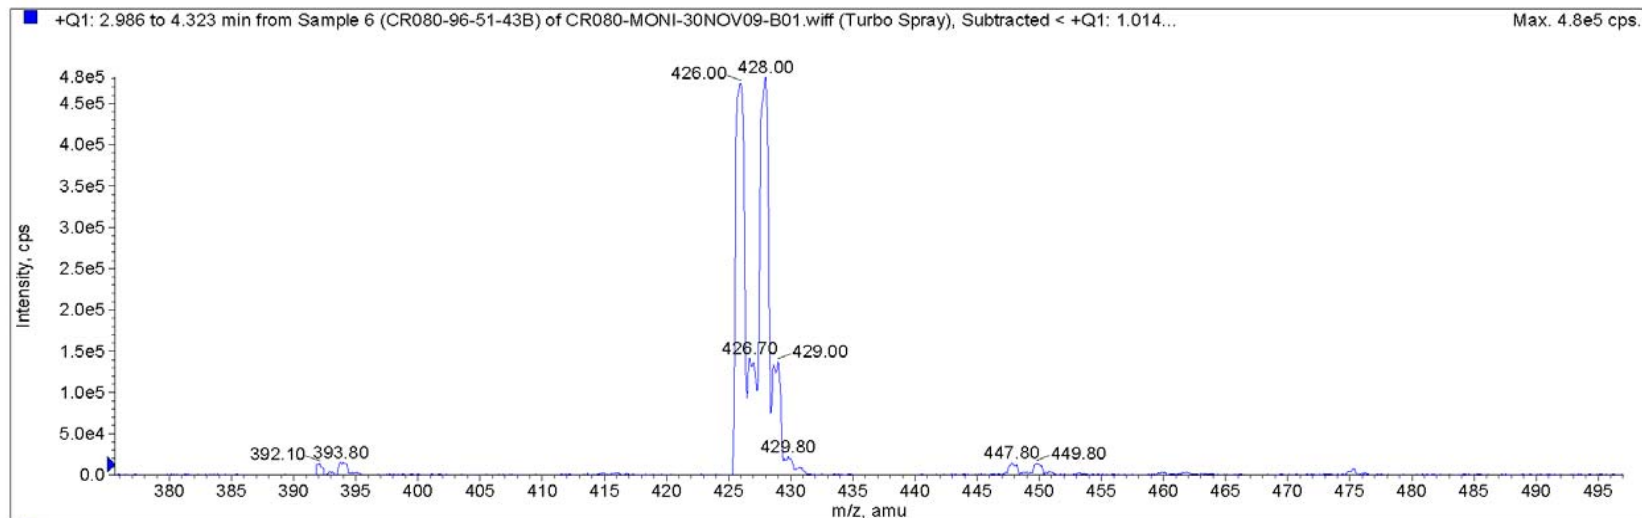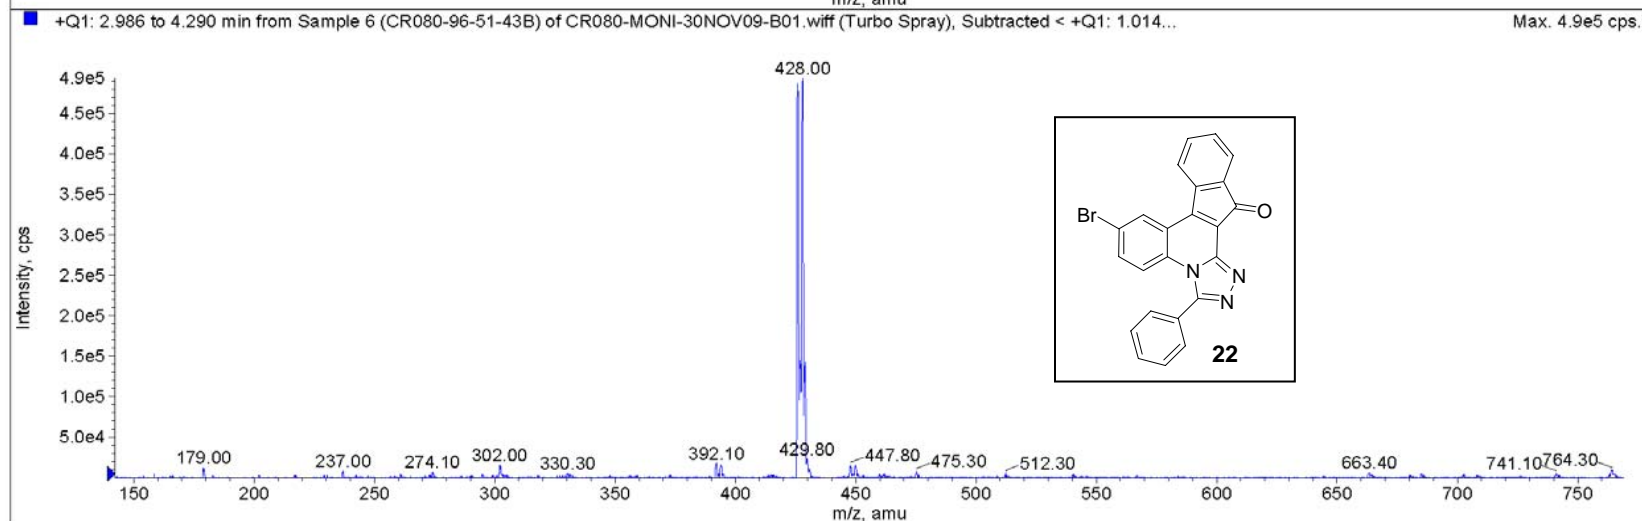

\*Sample Comment: [M+H] 426 Expected \*\*Analyzed By : \*\*Checked By :

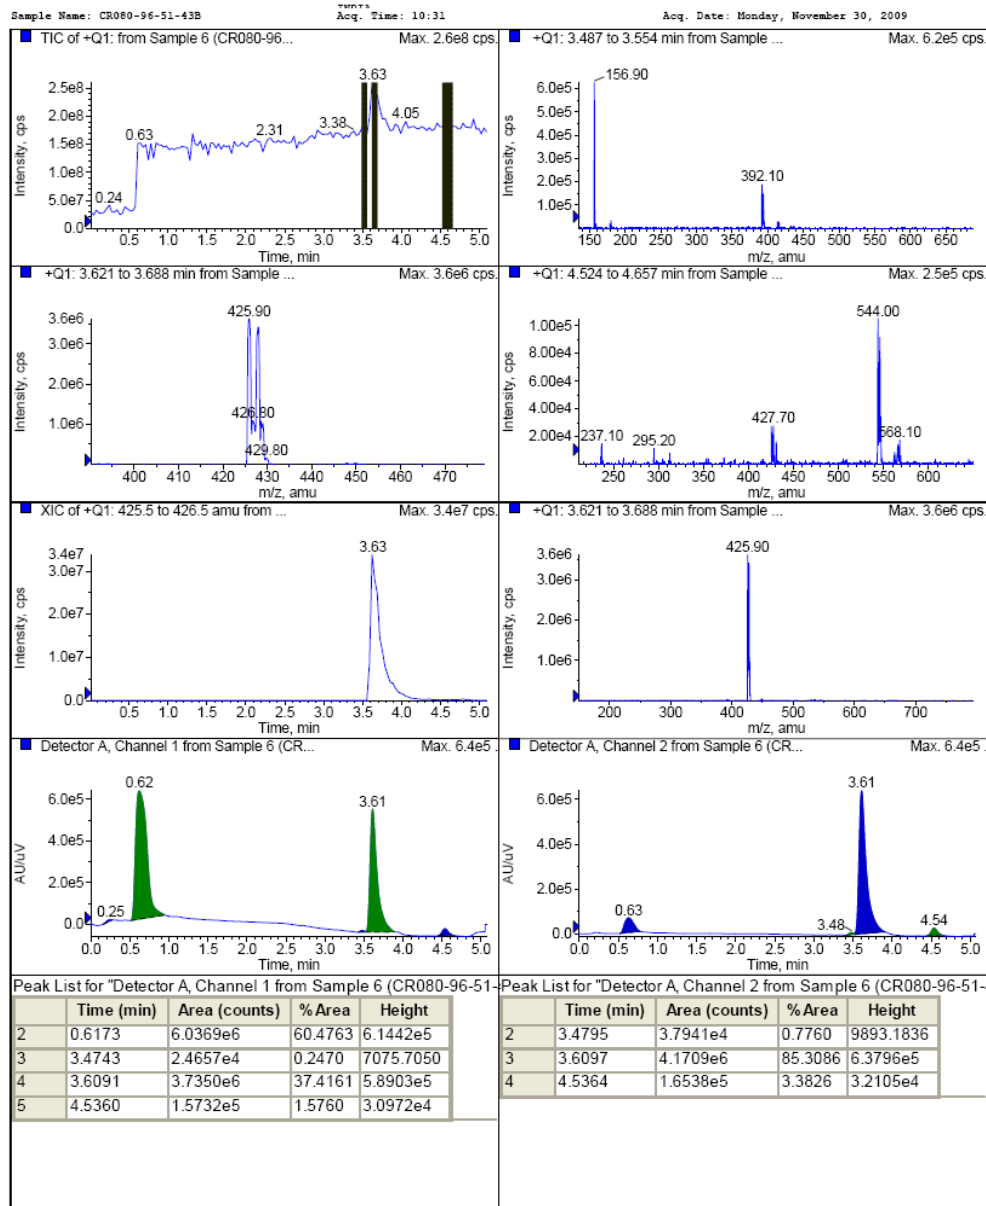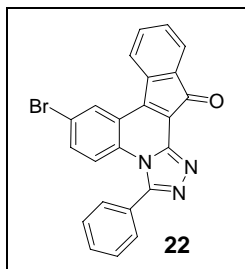

LCMS-1 REACH MONT (TFA Buffer)  
Channel 1 at wavelength 220nm, Channel 2 at wavelength 260 nm

Analyzed By :

```

=====
SAMPLE: CR080-96-51-43 B                                     ->
Column: GEMINI-C18(150X4.6)mm 5µ
Injection date : Mon, 8. Mar. 2010                        Location : Vial 16
Sample Name    : CR080-96-51-43 B                        Inj. No.  : 1
Acq Operator   : GANESH Z                                Inj. Vol. : 10 µl
Analysis Method : C:\CHEM32\2\METHODS\UPLC_GENARAL_GRAD_33.M
Last Changed   : Mon, 8. Mar. 2010,
Acq. Method    : C:\Chem32\2\DATA\MAR-10\080310C 2010-03-08 11-42-19\
                  UPLC_GENARAL_GRAD_33.M
Method ref     : NP/A0011/57

```

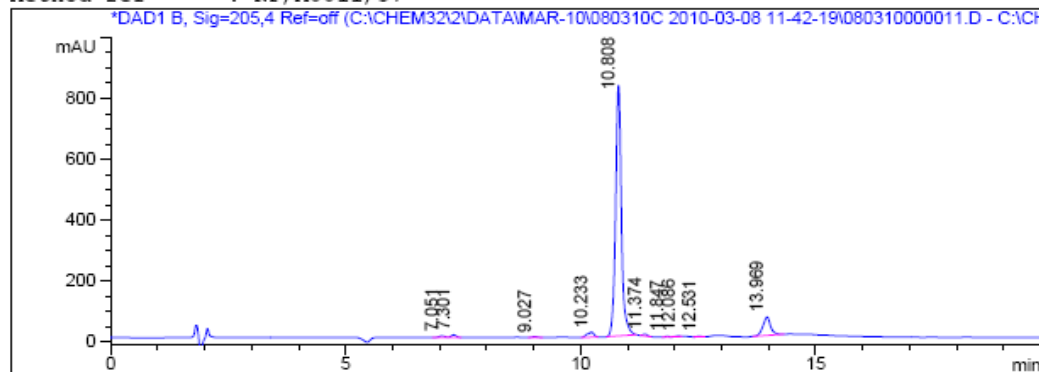

DAD1 B, Sig=205,4 Ref=off

| Peak # | RT (Min) | Width (Min) | Area    | Area % |
|--------|----------|-------------|---------|--------|
| 1      | 7.051    | 0.141       | 38.844  | 0.477  |
| 2      | 7.301    | 0.113       | 53.580  | 0.658  |
| 3      | 9.027    | 0.164       | 24.842  | 0.305  |
| 4      | 10.233   | 0.168       | 166.695 | 2.047  |
| 5      | 10.808   | 0.143       | 7.086e3 | 87.001 |
| 6      | 11.374   | 0.109       | 39.993  | 0.491  |
| 7      | 11.847   | 0.077       | 14.607  | 0.179  |
| 8      | 12.086   | 0.134       | 15.508  | 0.190  |
| 9      | 12.531   | 0.117       | 10.940  | 0.134  |
| 10     | 13.969   | 0.190       | 693.677 | 8.517  |

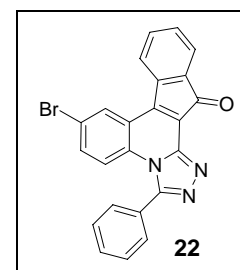

\*\*\* End of Report\*\*\*



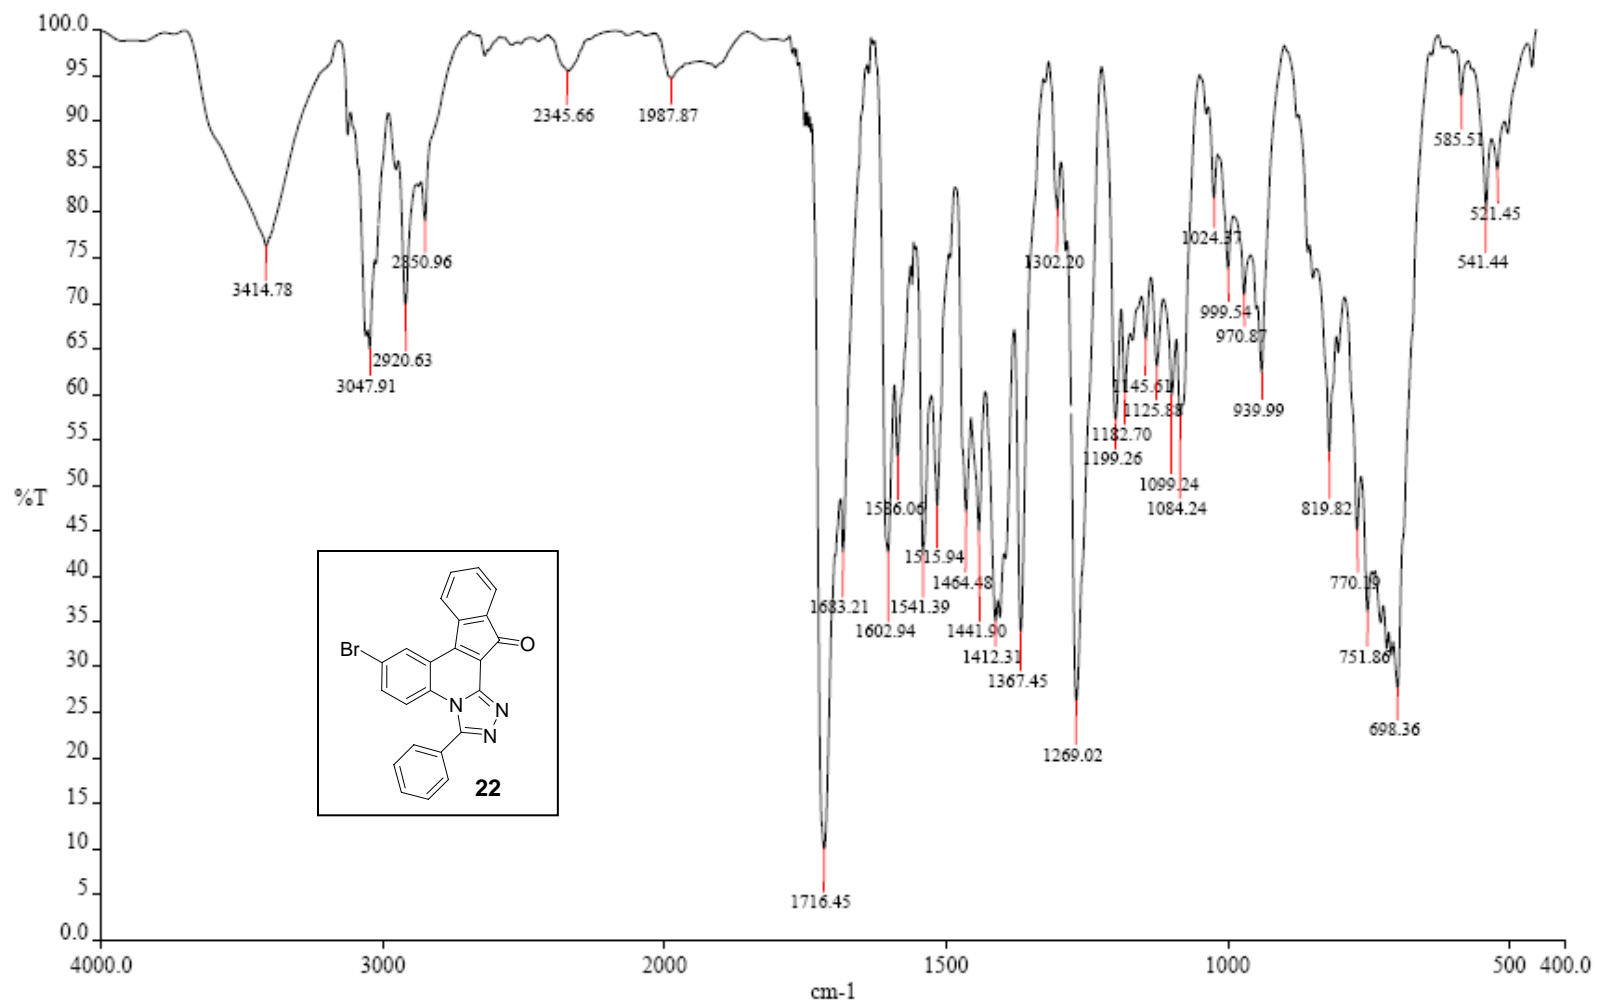

Spectrum Name: CR080-96-51-43B.sp

Analyst: GANESH

Accumulations: 16

Time: 2:48:26 PM

Description: CR080-96-51-43B IN KBr

Resolution: 4.00 cm-1

Date: 2/10/2010

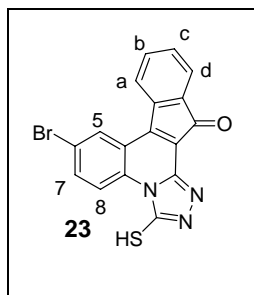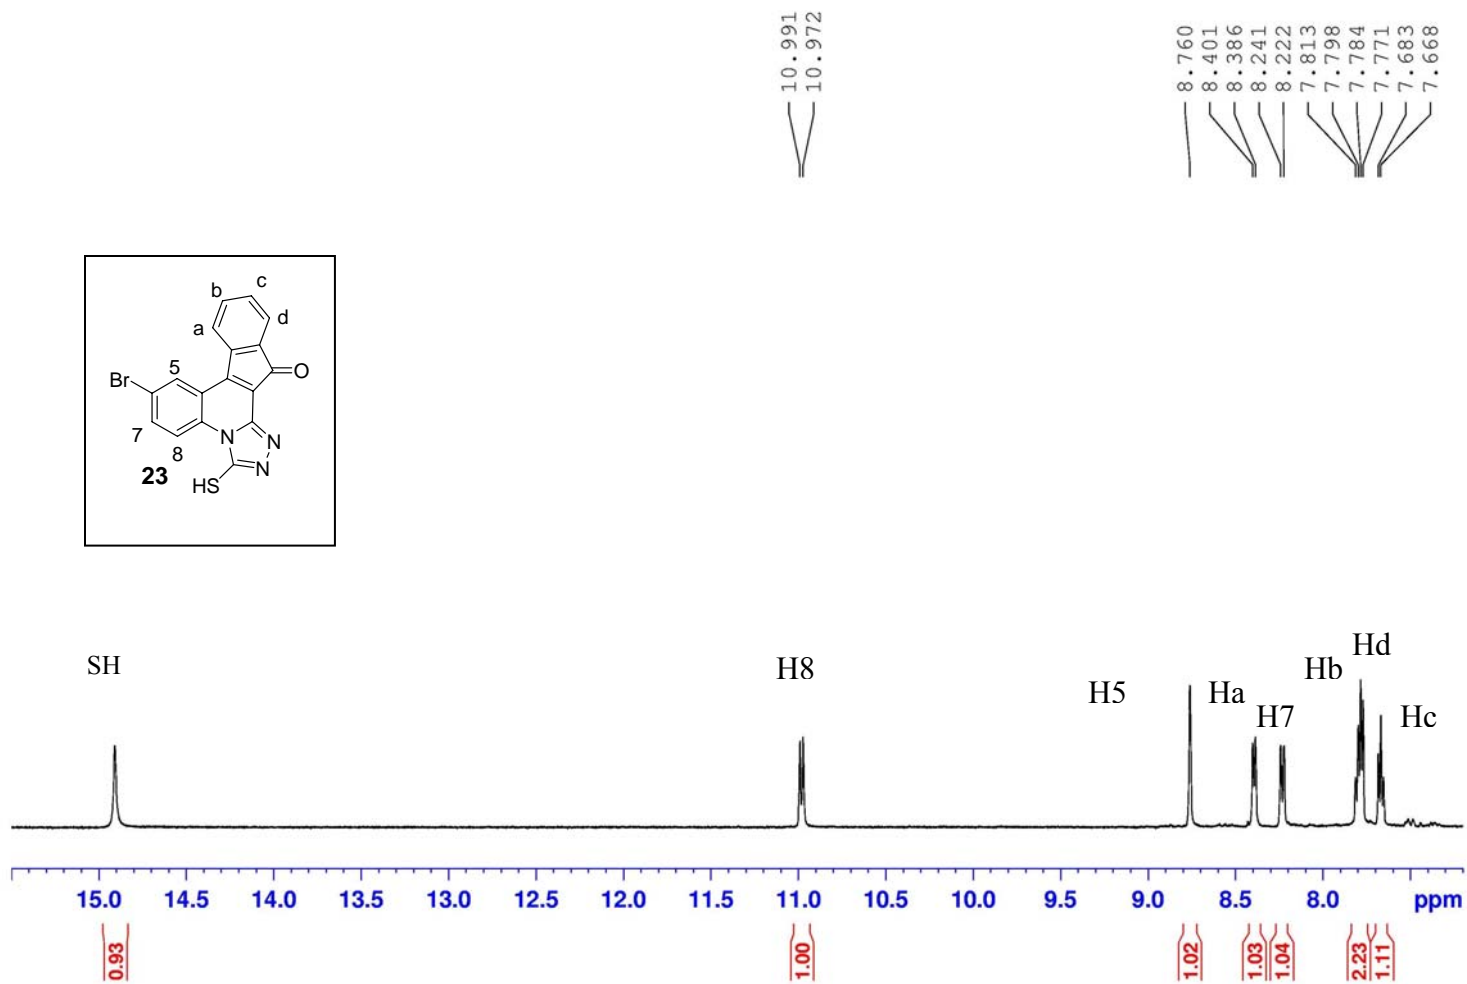

10.991  
10.972

8.760  
8.401  
8.386  
8.241  
8.222  
7.813  
7.798  
7.784  
7.771  
7.683  
7.668

NAME CR080-97-33-33A1  
 EXPNO 2  
 PROCNO 1  
 Date\_ 20100323  
 Time 19.13  
 INSTRUM spect  
 PROBHD 5 mm DUL 13C-1  
 PULPROG zg30  
 TD 32768  
 SOLVENT DMSO  
 NS 8  
 DS 0  
 SWH 8278.146 Hz  
 FIDRES 0.252629 Hz  
 AQ 1.9792372 sec  
 RG 228.1  
 DW 60.400 usec  
 DE 6.00 usec  
 TE 291.8 K  
 D1 3.00000000 sec  
 TD0 1

===== CHANNEL f1 =====  
 NUC1 1H  
 P1 12.50 usec  
 PL1 -1.00 dB  
 SFO1 400.1324710 MHz  
 SI 16384  
 SF 400.1300016 MHz  
 WDW EM  
 SSB 0  
 LB 0.30 Hz  
 GB 0  
 PC 0.50

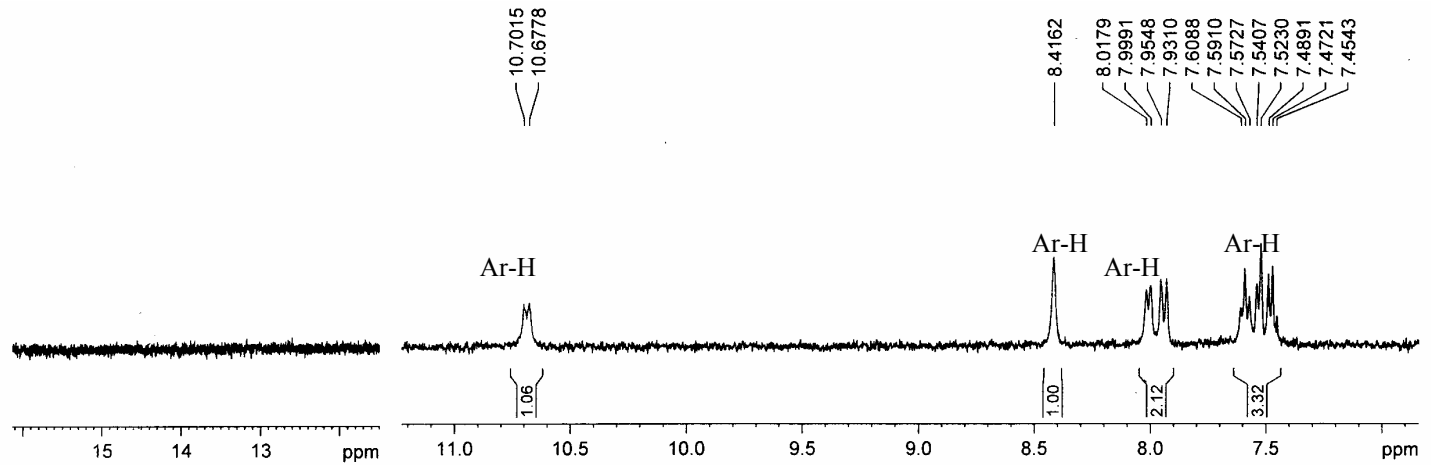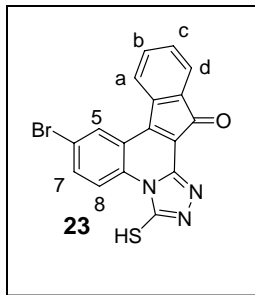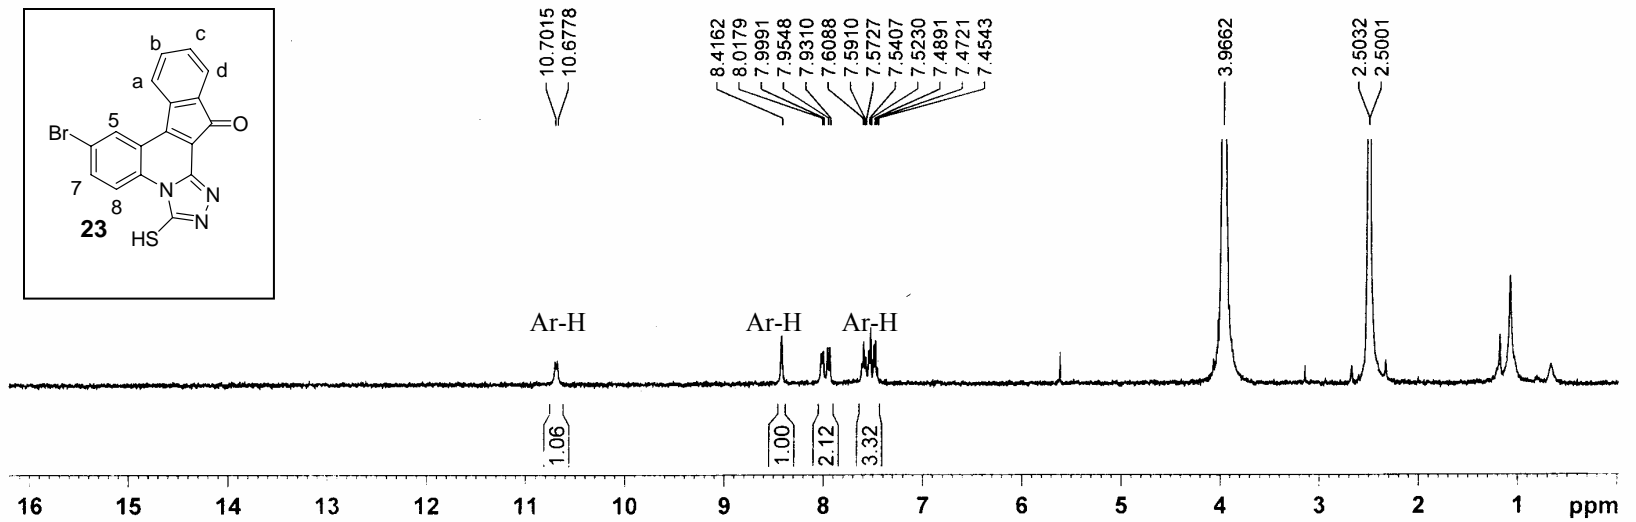

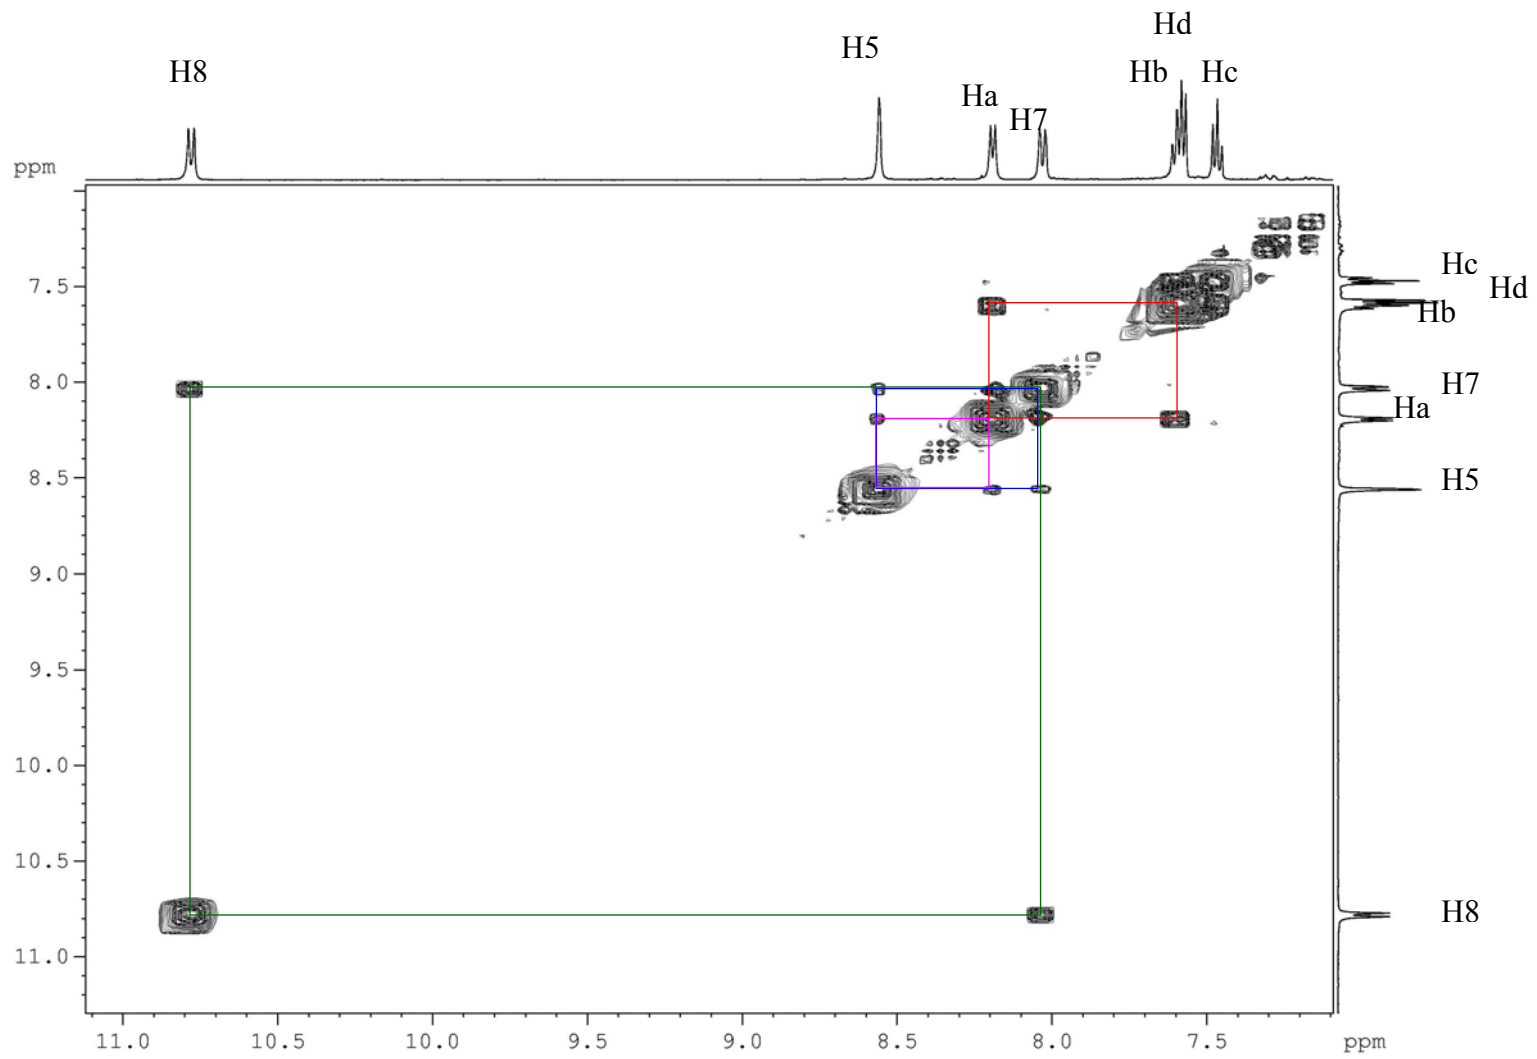

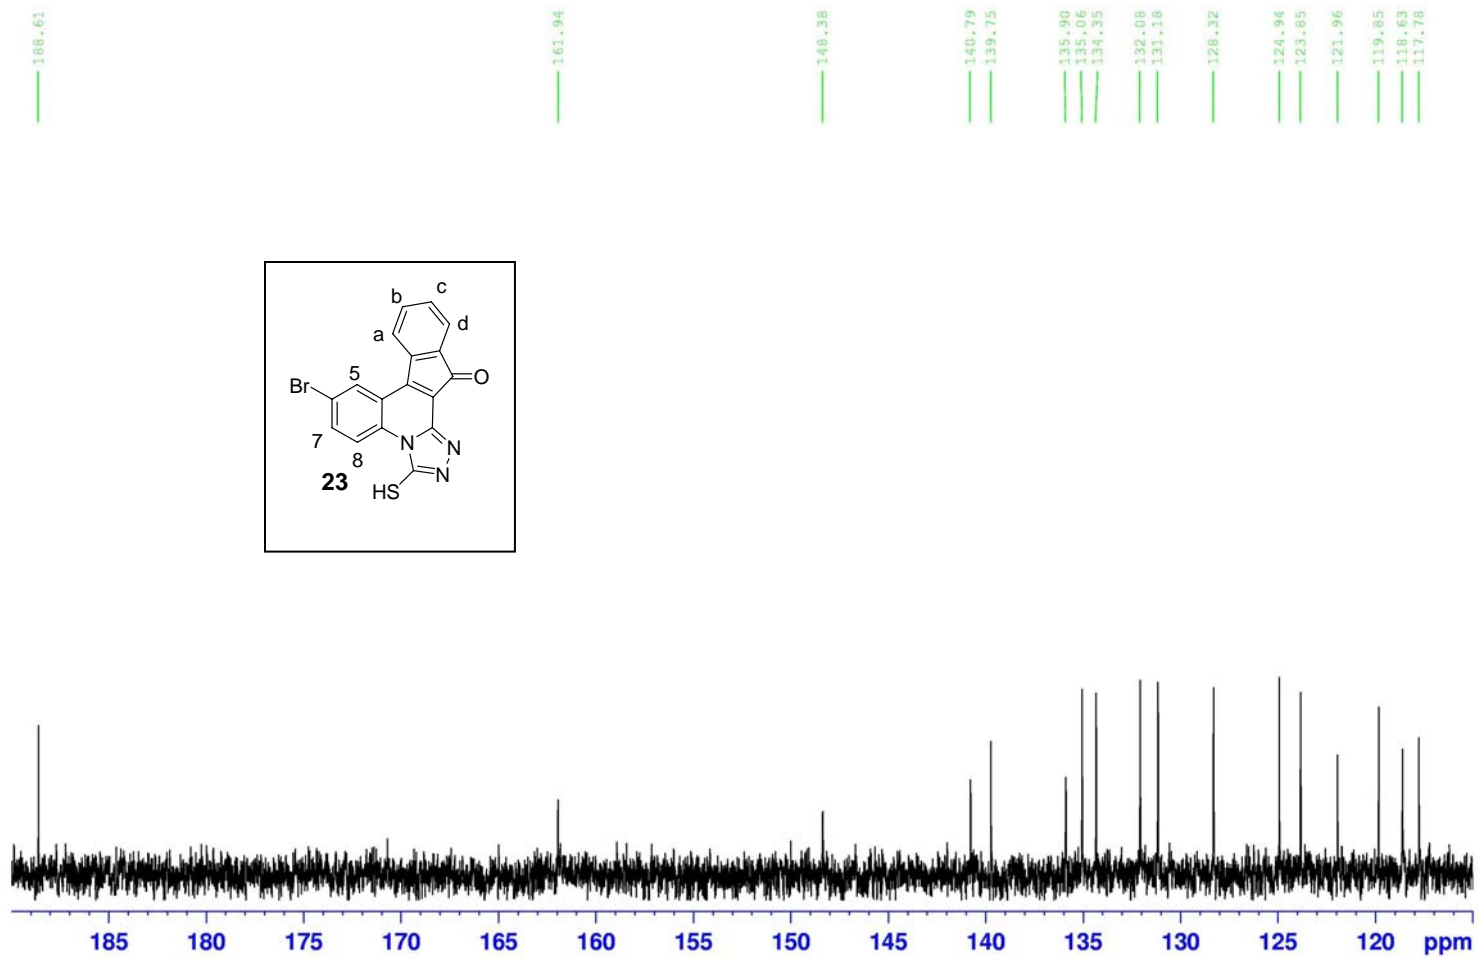

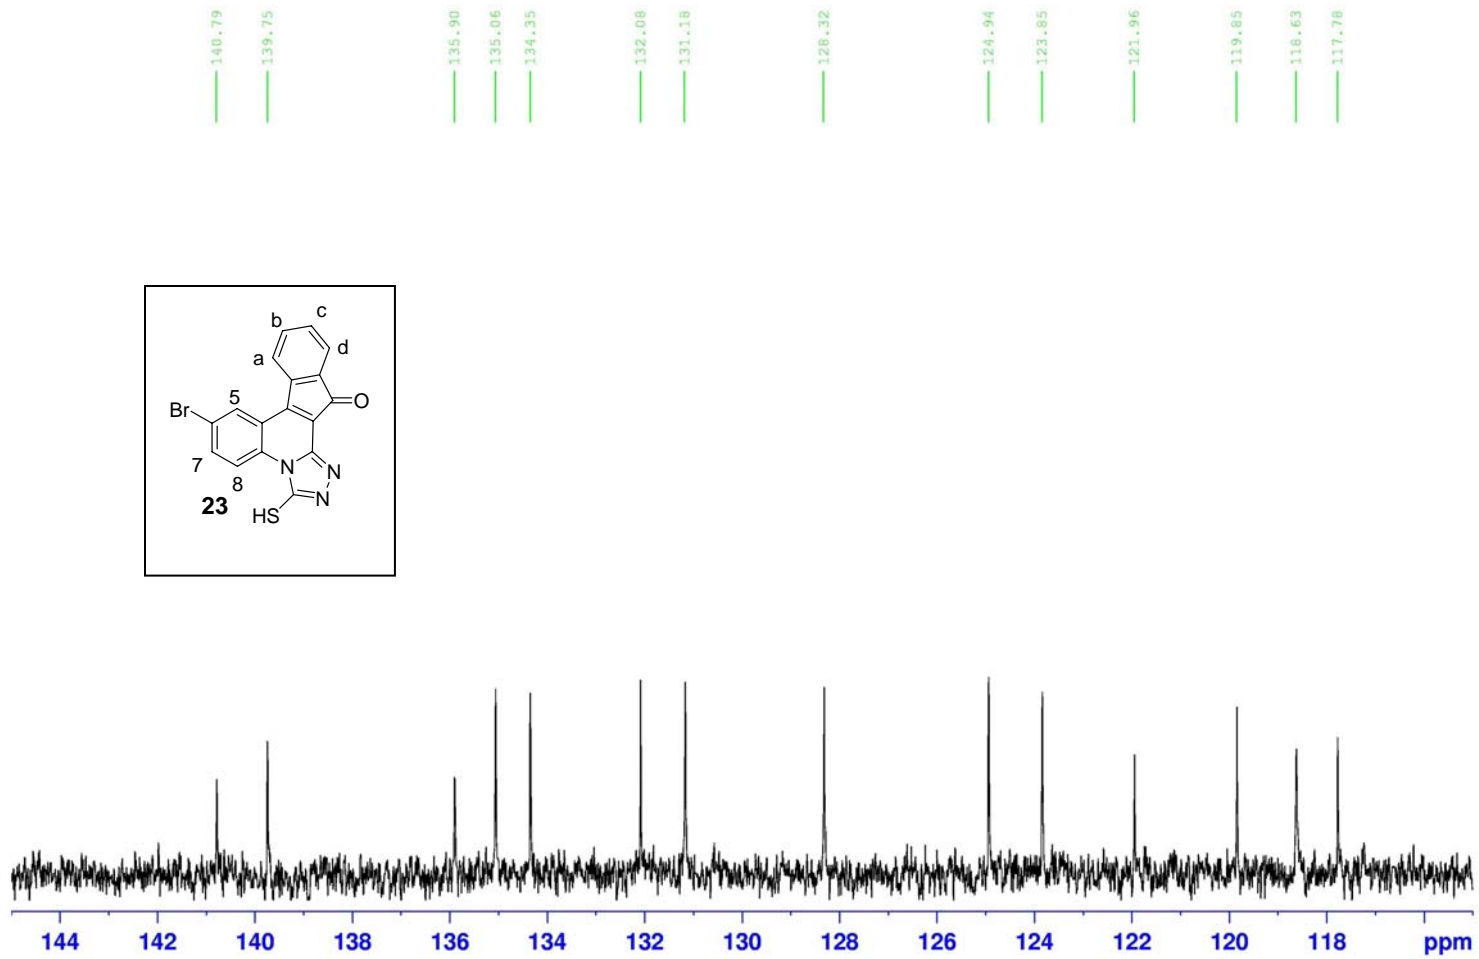

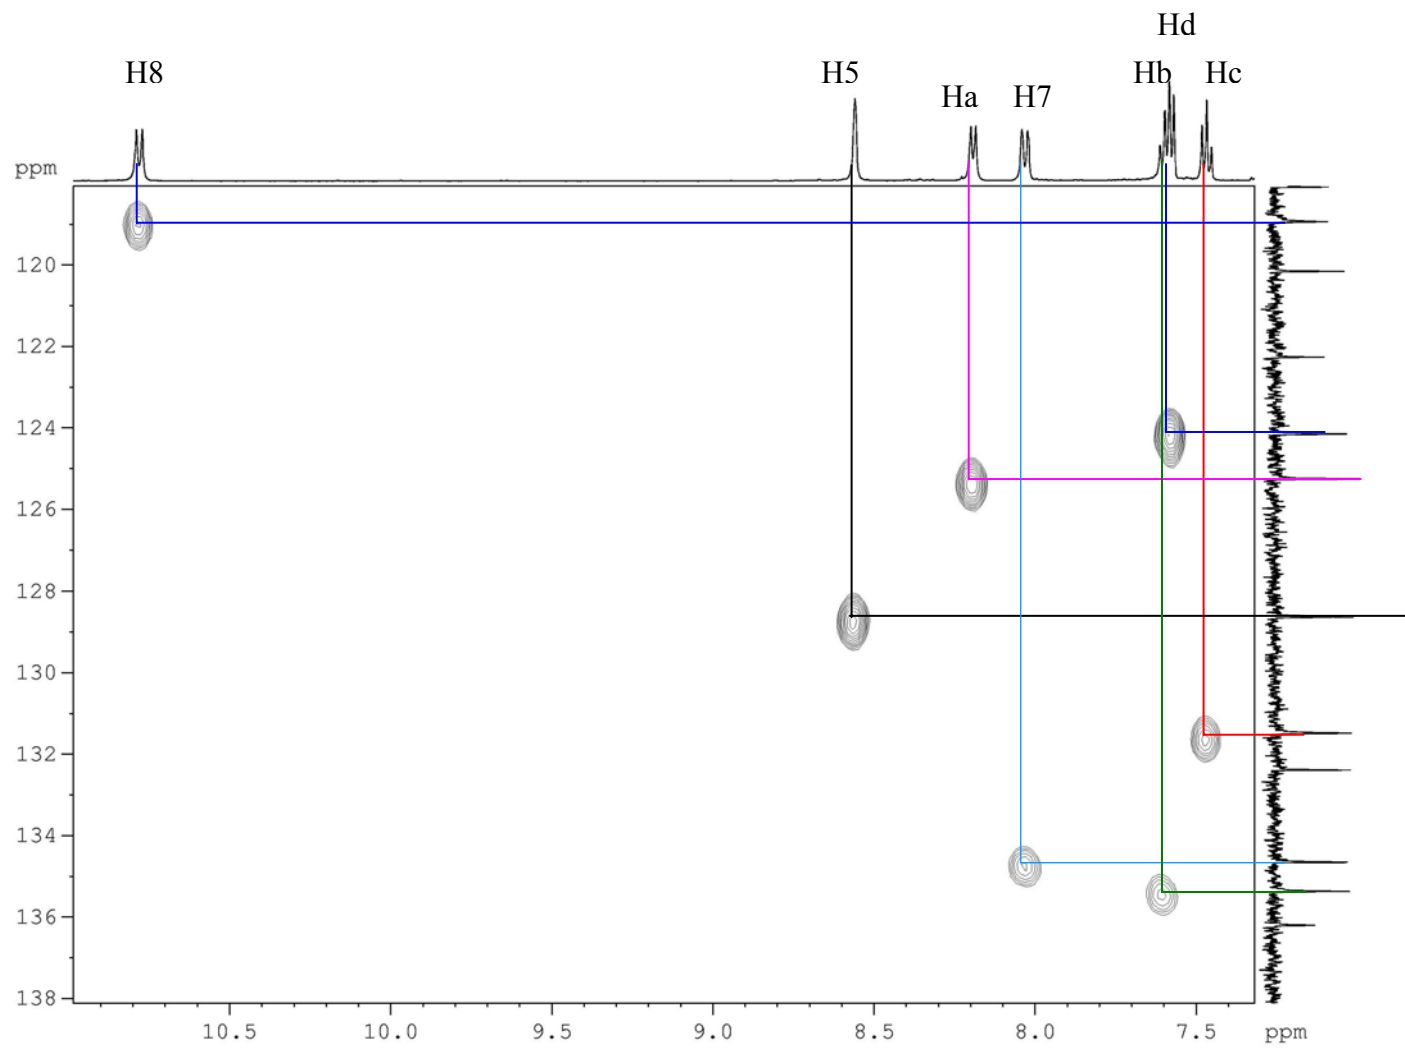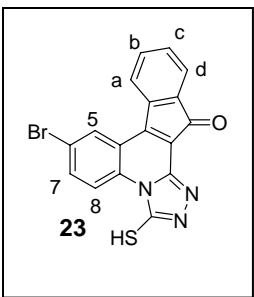

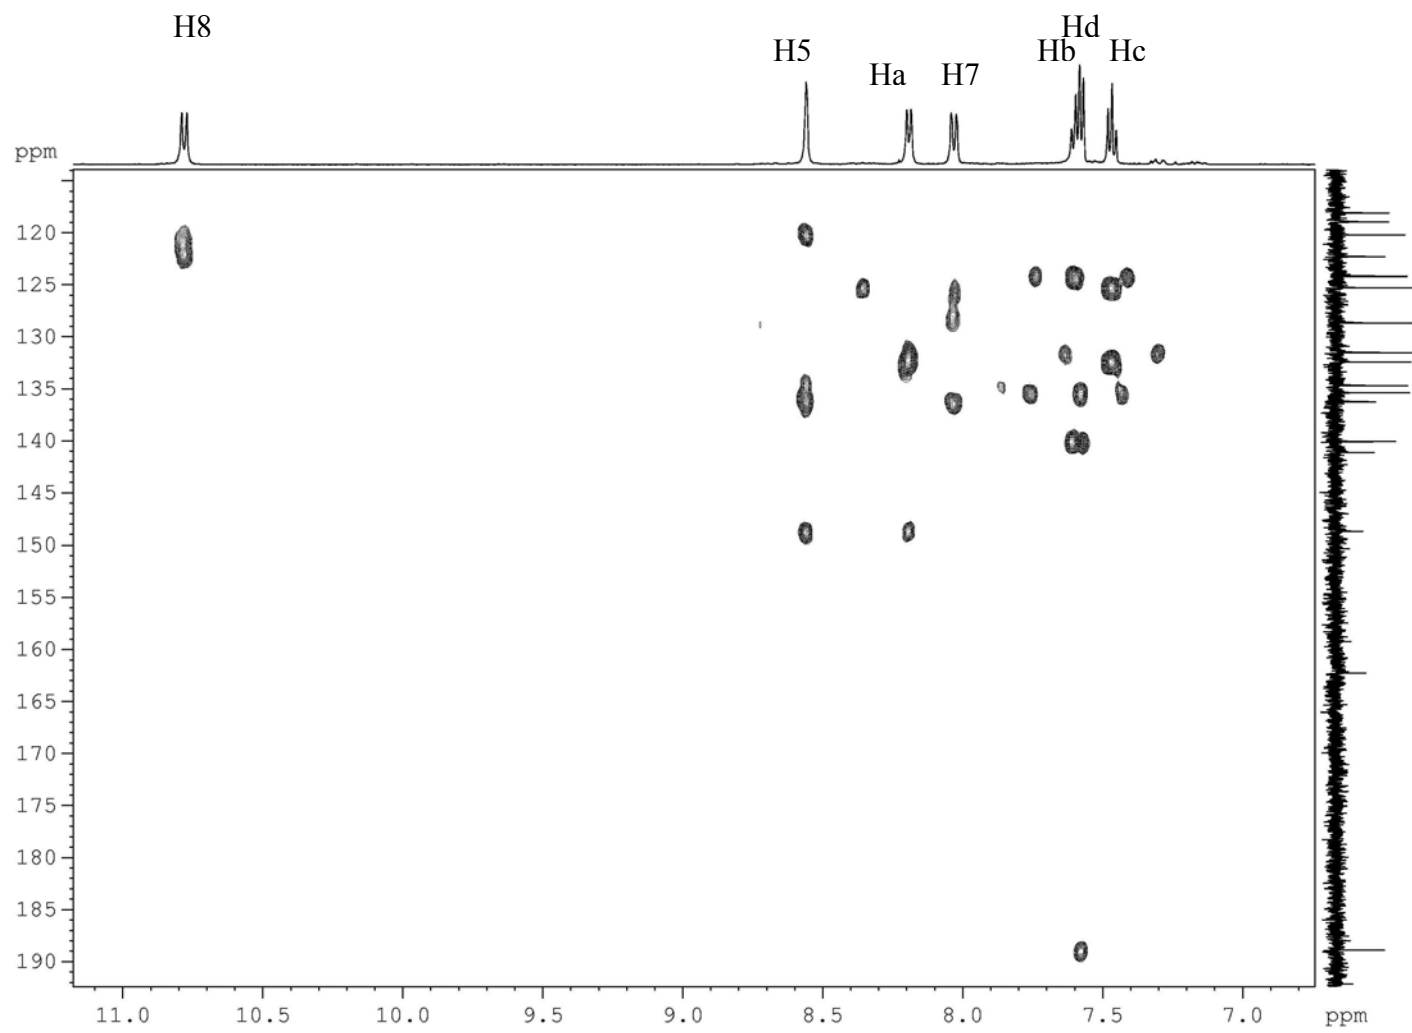



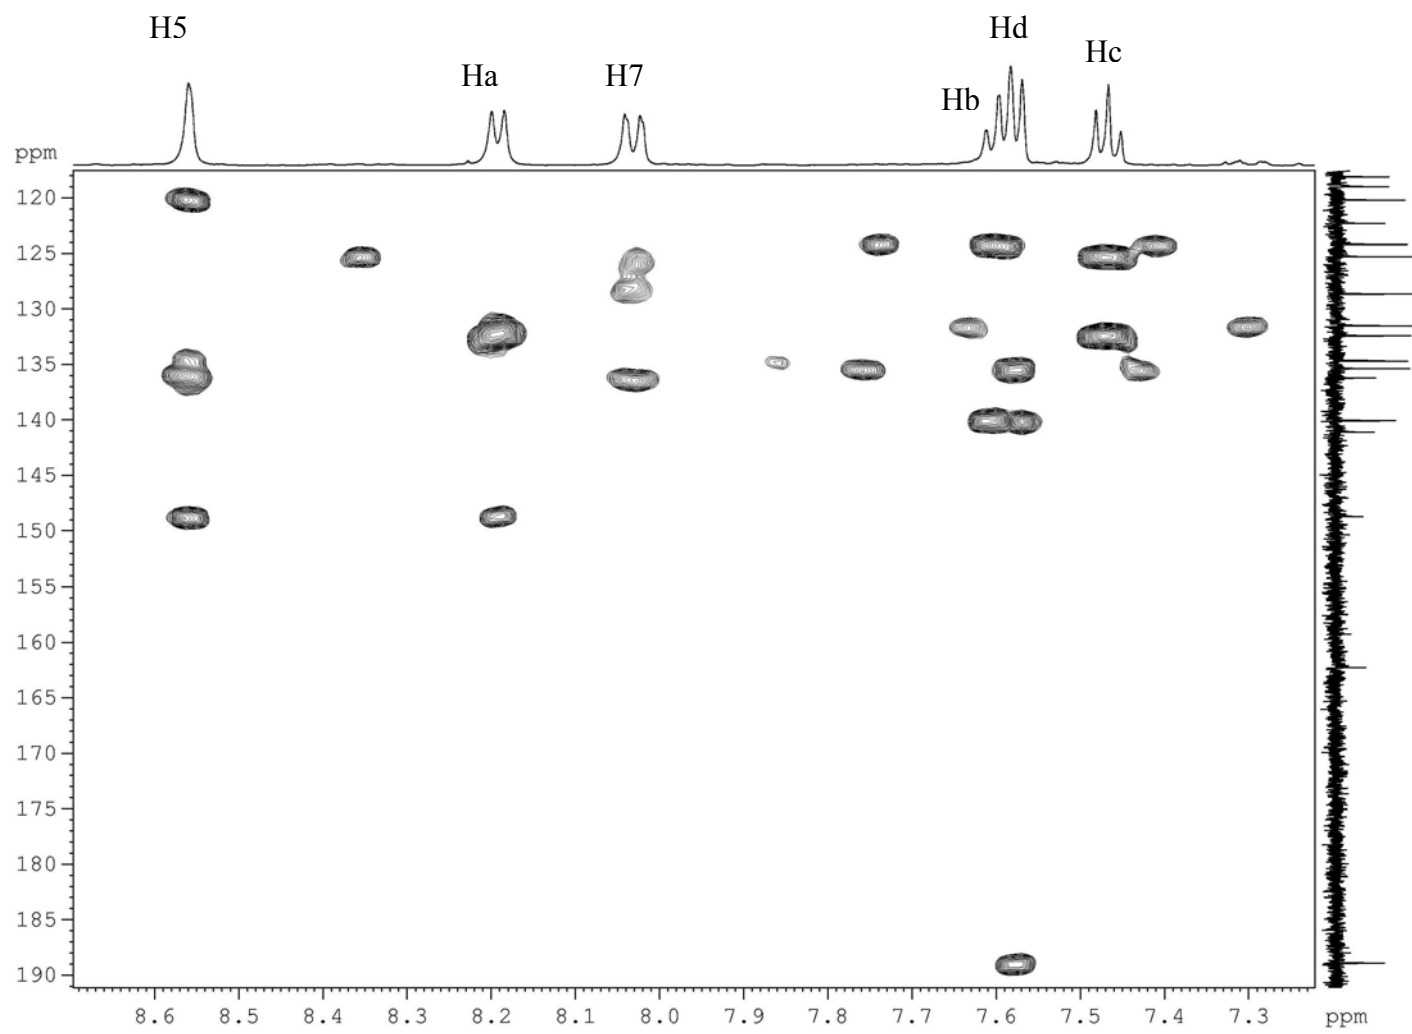

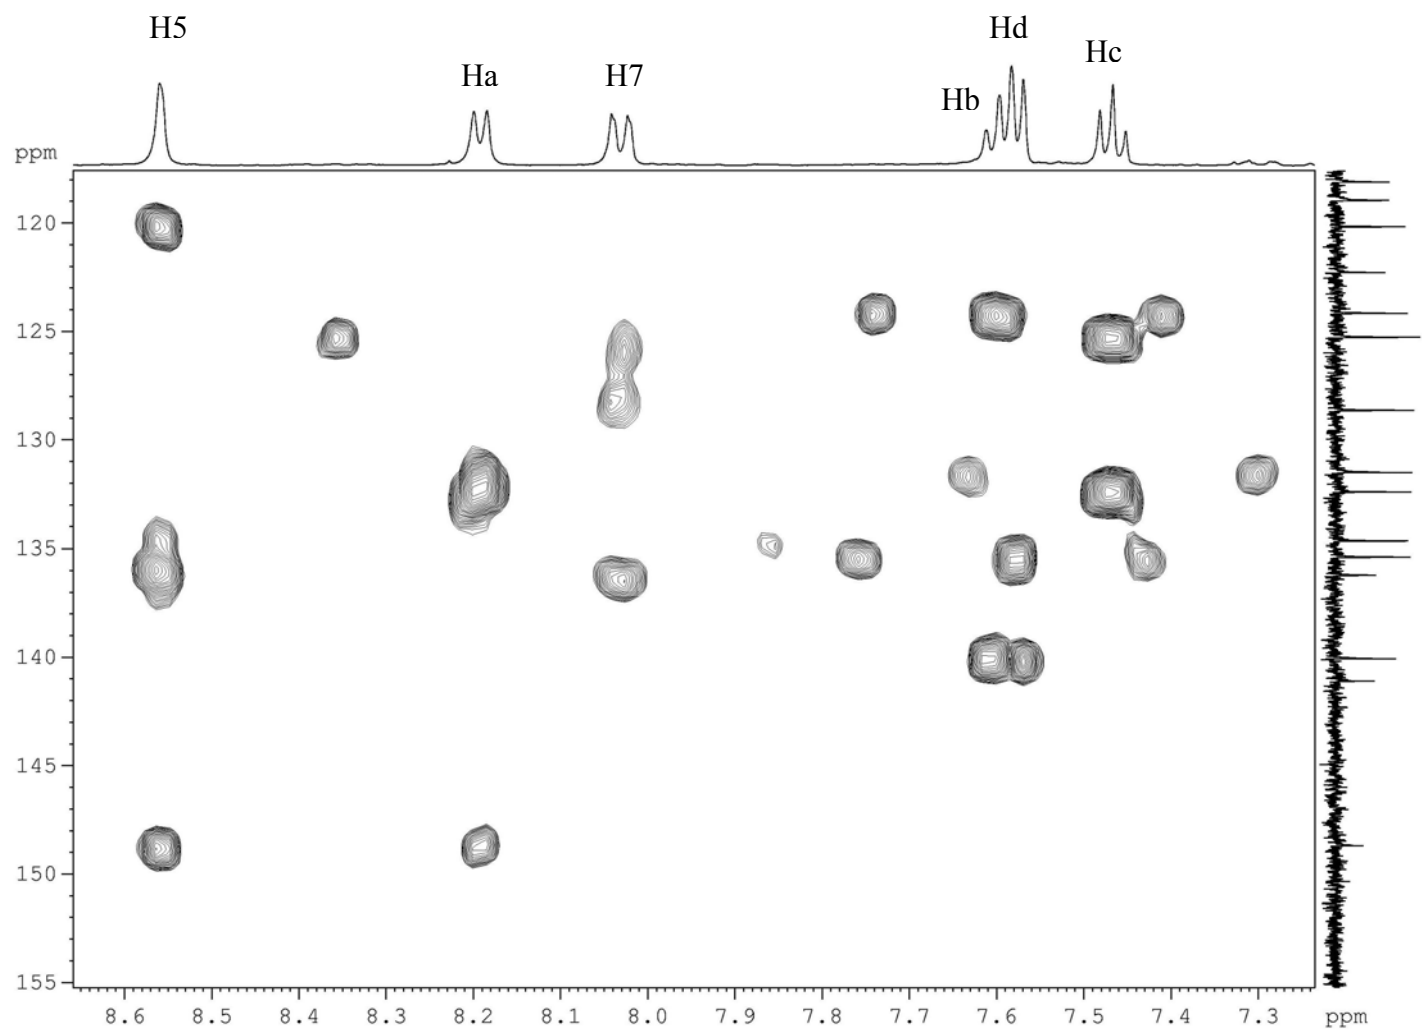

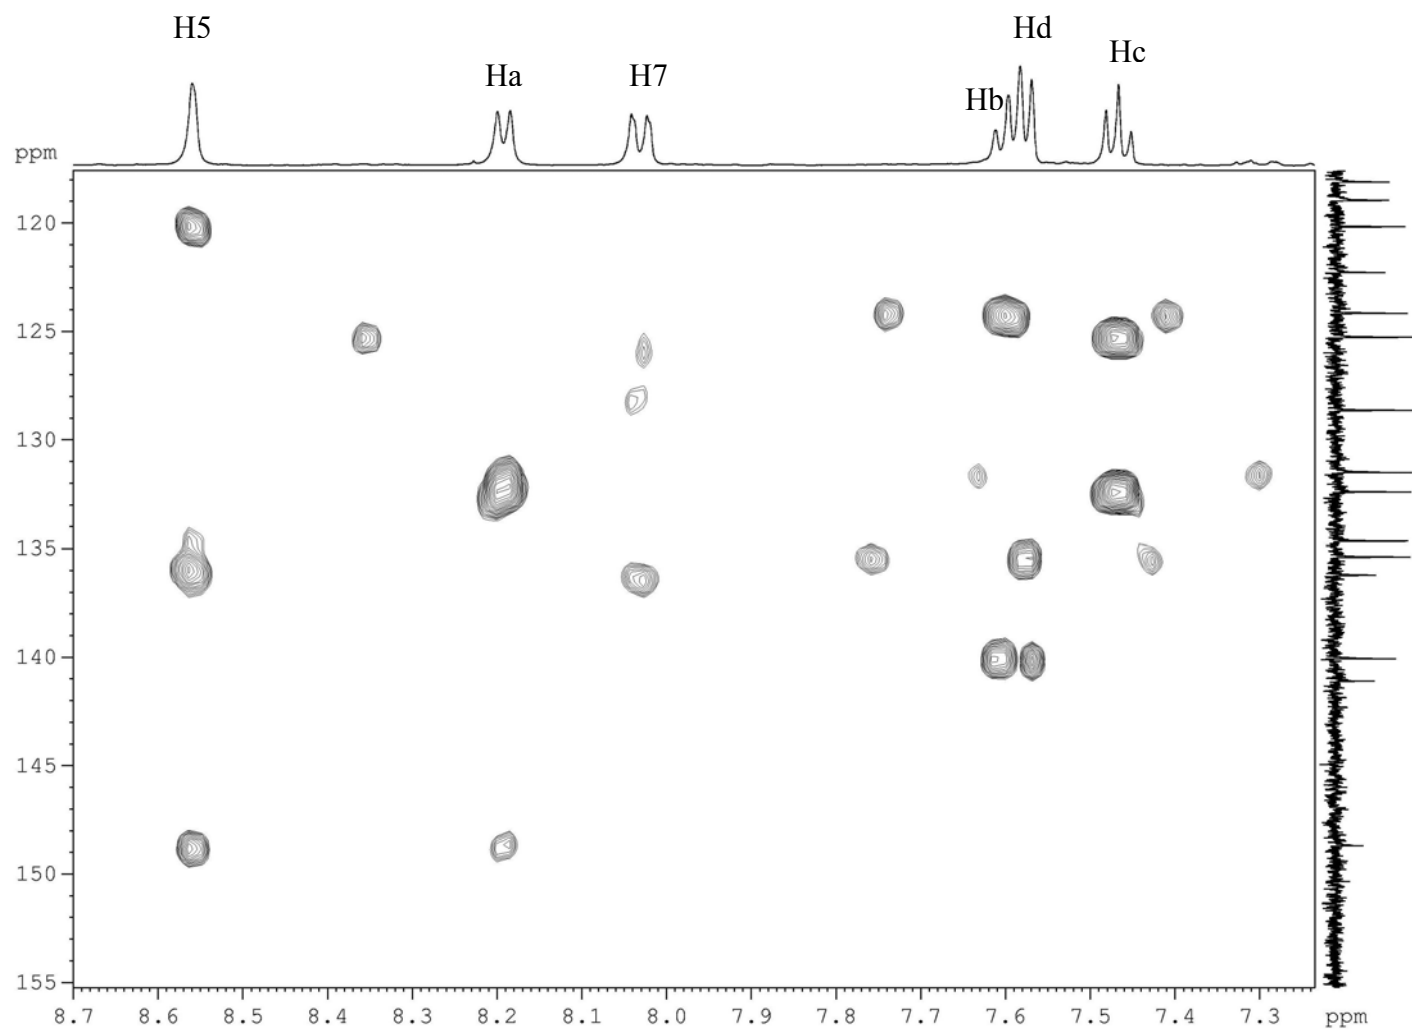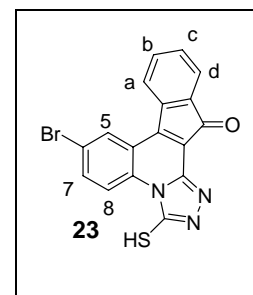

\*

Sample Name: CR080-97-33-33A

INDIA  
Acq. Time: 15:37

Acq. Date: Friday, November 20, 2009

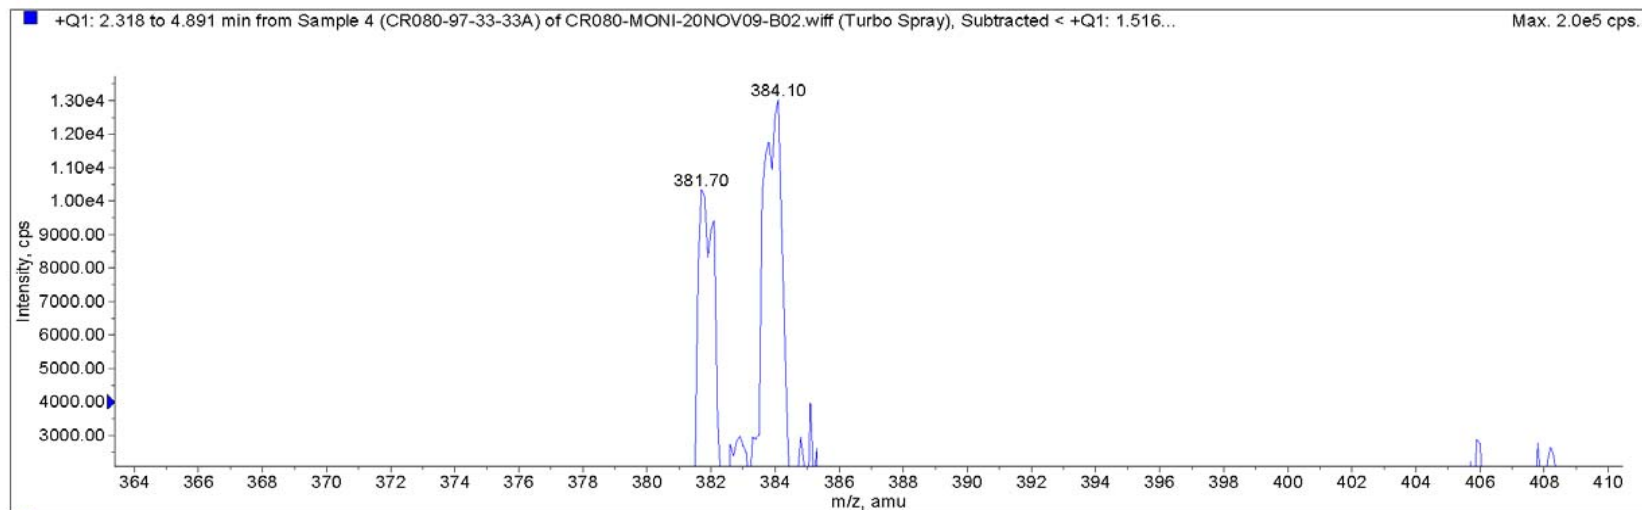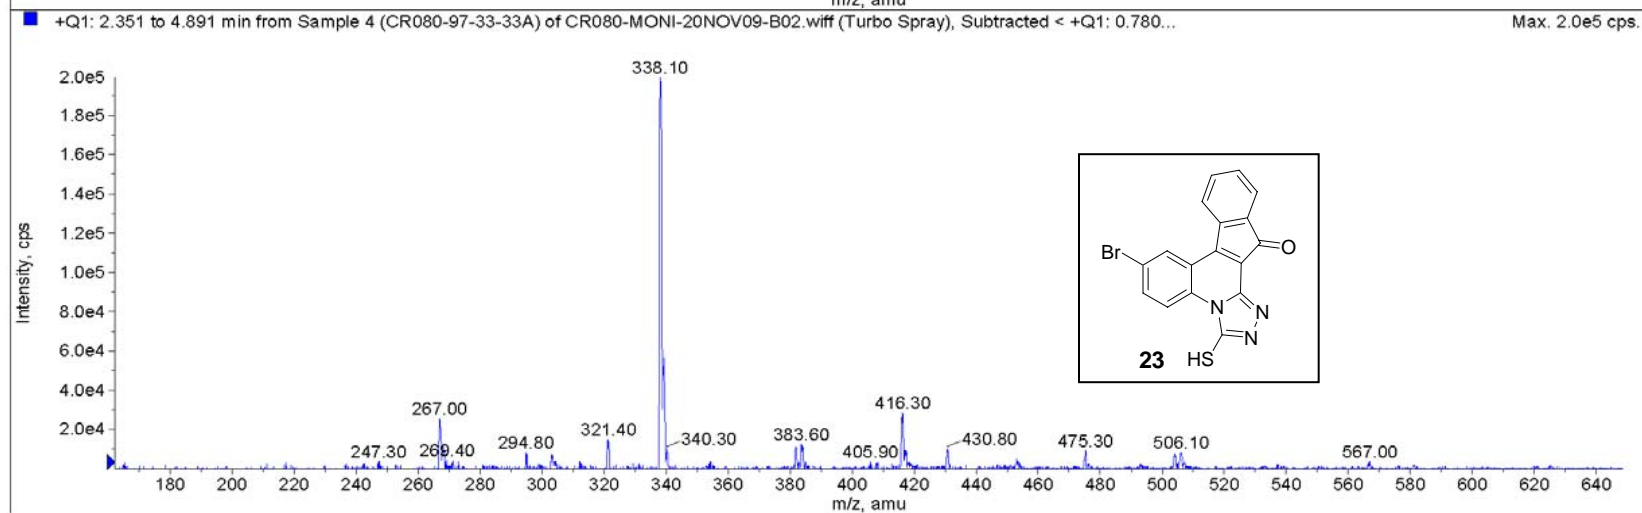

\*Sample Comment: [M+H] 382

Expected

\*\*Analyzed By :

\*\*Checked By :

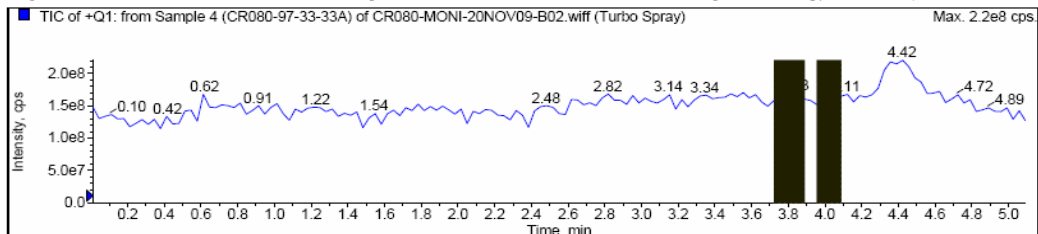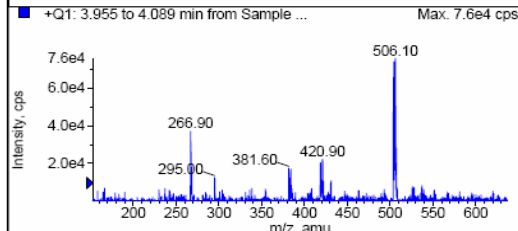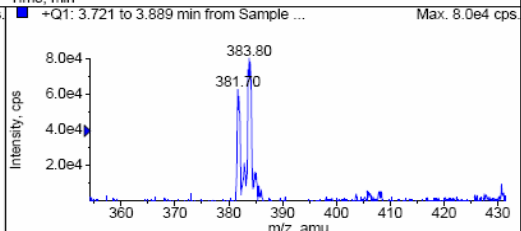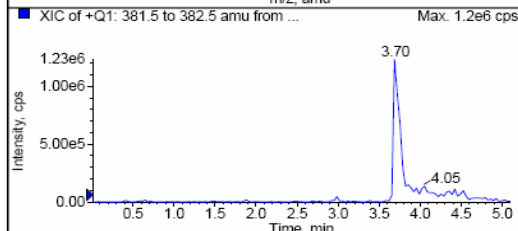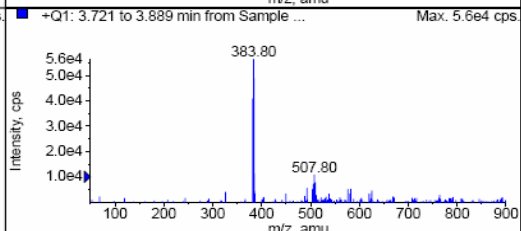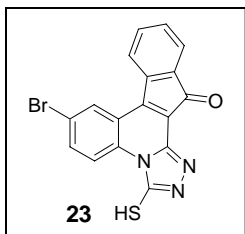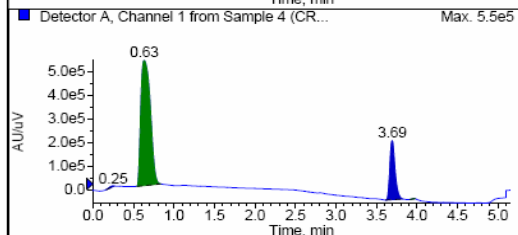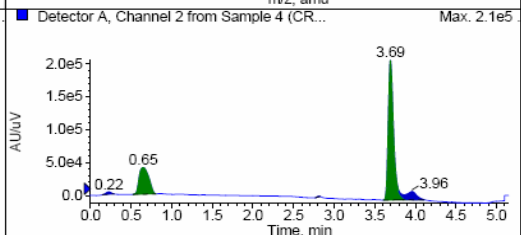

Peak List for "Detector A, Channel 1 from Sample 4 (CR080-97-33-33A)"

| Time (min) | Area (counts) | %Area     | Height  |           |
|------------|---------------|-----------|---------|-----------|
| 2          | 0.6335        | 4.2336e6  | 79.7072 | 5.2696e5  |
| 3          | 3.6949        | 1.0599e6  | 19.9540 | 2.4799e5  |
| 4          | 3.9639        | 2813.5490 | 0.0530  | 1211.7812 |

Peak List for "Detector A, Channel 2 from Sample 4 (CR080-97-33-33A)"

| Time (min) | Area (counts) | %Area     | Height  |          |
|------------|---------------|-----------|---------|----------|
| 3          | 2.8136        | 1412.1798 | 0.1001  | 660.8329 |
| 4          | 3.6933        | 9.5910e5  | 67.9760 | 2.1202e5 |
| 5          | 3.9609        | 1.0863e5  | 7.6993  | 1.2210e4 |

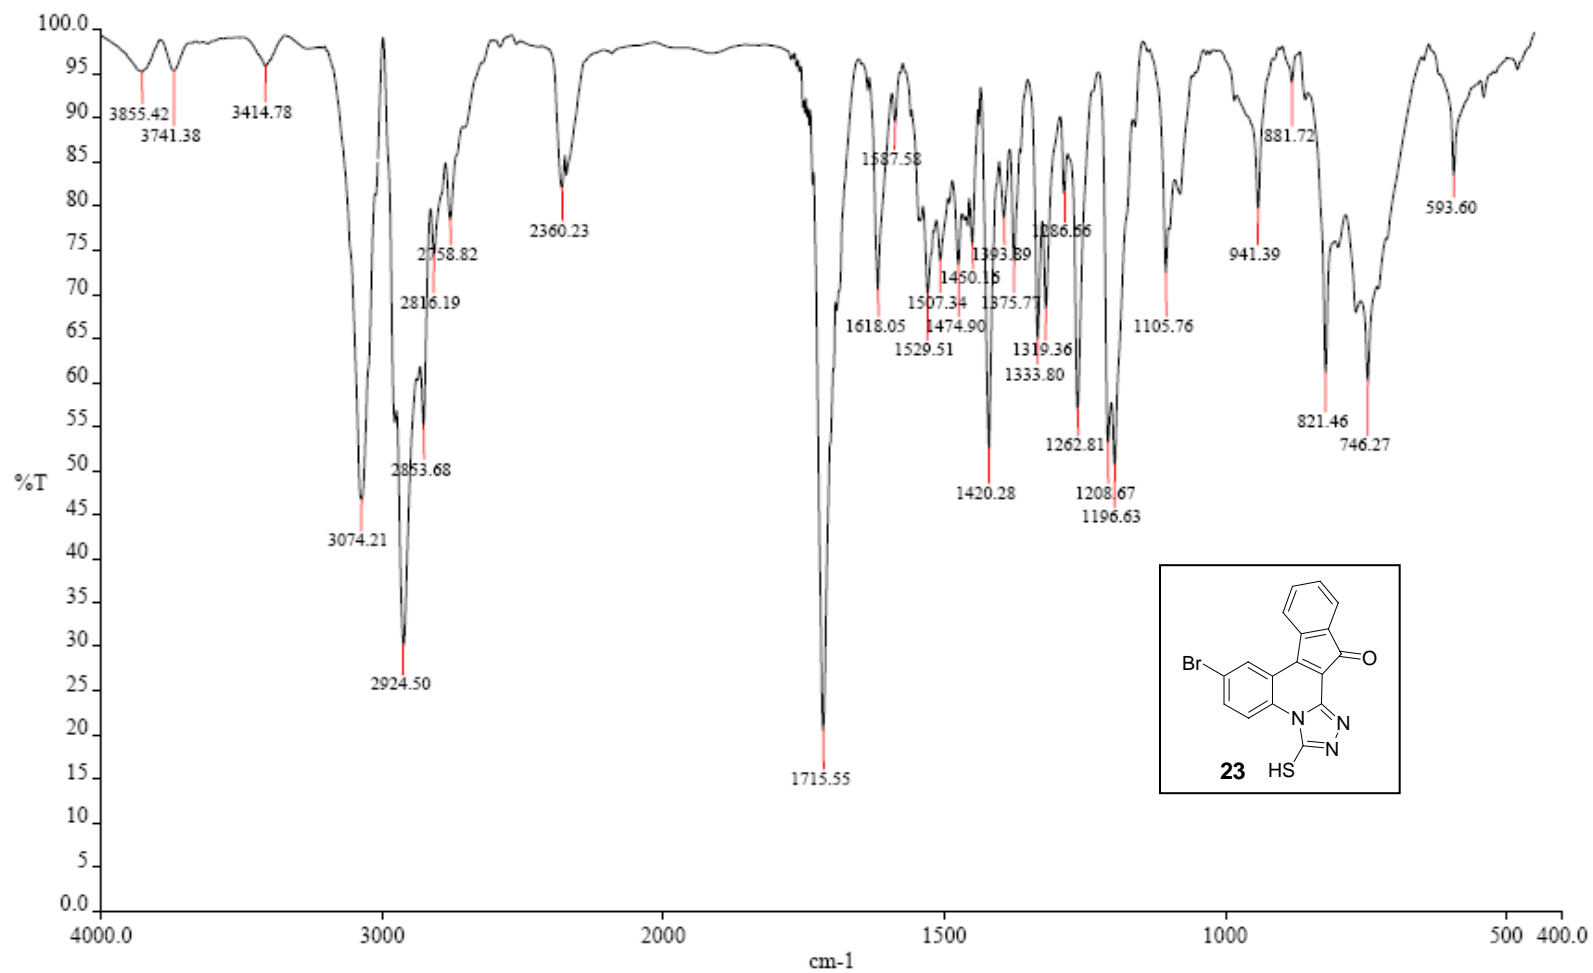

Spectrum Name: CR080-97-33-33A.sp

Analyst: GANESH

Accumulations: 16

Time: 1:17:39 PM

Description: CR080-97-33-33A IN KBr

Resolution: 4.00 cm-1

Date: 2/5/2010

NAME CR080-07-163-163A  
 EXPNO 1  
 PROCNO 1  
 Date 20090616  
 Time 15.56  
 INSTRUM spect  
 PROBHD 5 mm DUL 13C-1  
 PULPROG zg30  
 TD 32768  
 SOLVENT CDCl3  
 NS 8  
 DS 0  
 SWH 8278.146 Hz  
 FIDRES 0.252629 Hz  
 AQ 1.9792372 sec  
 RG 645.1  
 DW 60.400 usec  
 DE 6.00 usec  
 TE 292.8 K  
 D1 3.00000000 sec  
 TD0 1

----- CHANNEL f1 -----  
 NUC1 1H  
 P1 12.50 usec  
 PL1 -1.00 dB  
 SFO1 400.1324710 MHz  
 SI 16384  
 SF 400.1300129 MHz  
 WDW EM  
 SSB 0  
 LB 0.30 Hz  
 GB 0  
 PC 0.50

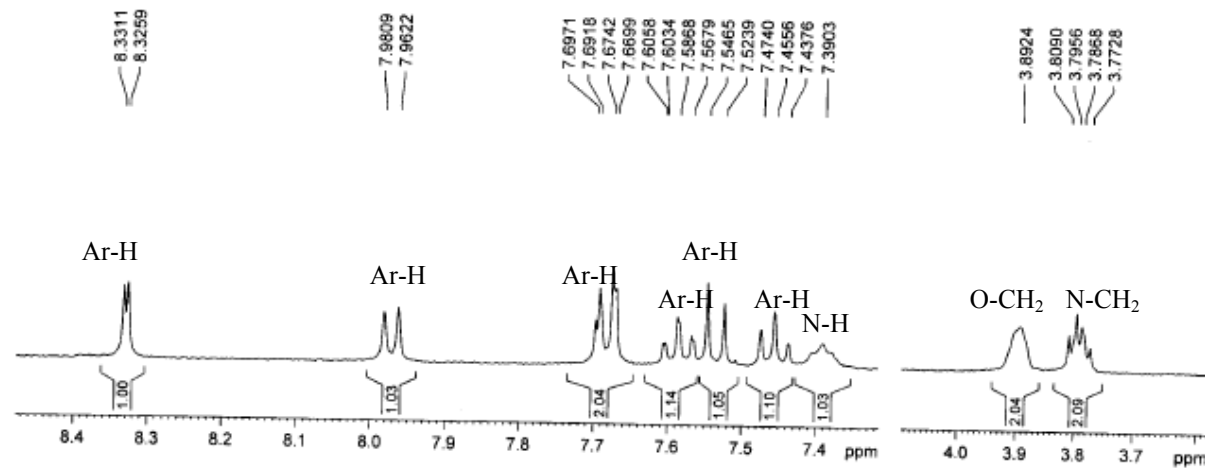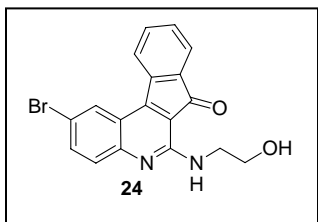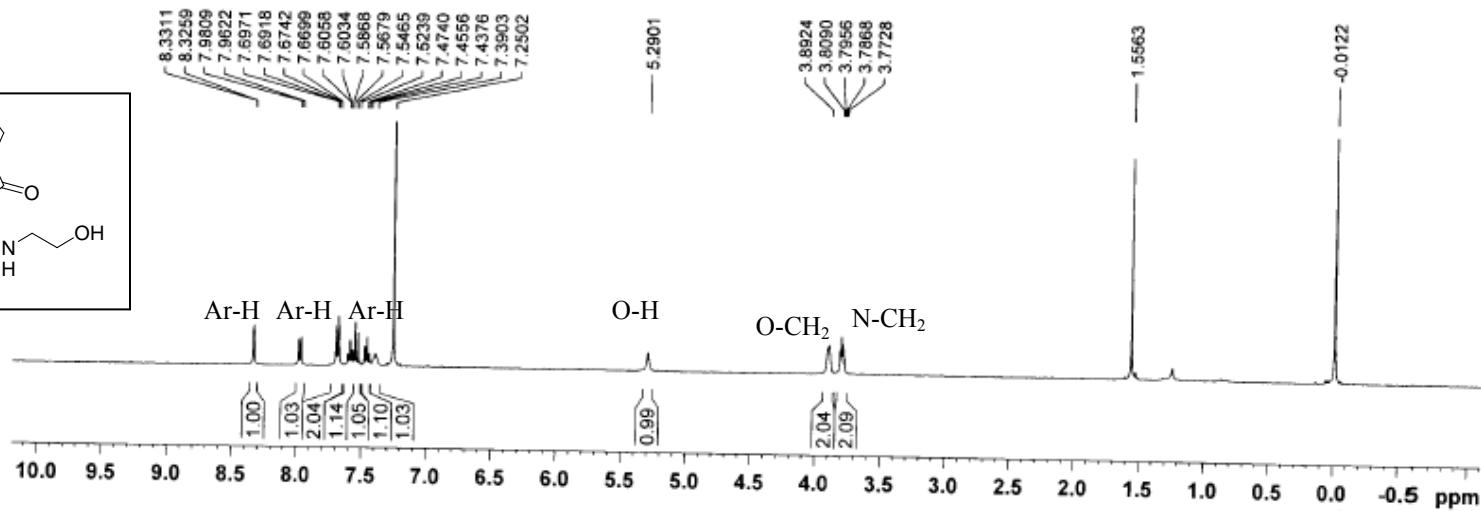

June 19.

NAME CR060-67-163-163A  
 EXPNO 2  
 PROCNO 1  
 Date\_ 20090611  
 Time 9.06  
 INSTRUM spect  
 PROBHD 5 mm DUL 13C-1  
 PULPROG zg30  
 TD 32768  
 SOLVENT CDCl3  
 NS 8  
 DS 0  
 SWH 6278.146 Hz  
 FIDRES 0.252629 Hz  
 AQ 1.9792372 sec  
 RG 912.1  
 DW 60.400 usec  
 DE 6.00 usec  
 TE 292.0 K  
 D1 3.0000000 sec  
 TD0 1  
 ===== CHANNEL f1 =====  
 NUC1 1H  
 P1 12.50 usec  
 PL1 -1.00 dB  
 SFO1 400.1324710 MHz  
 SI 16384  
 SF 400.1300129 MHz  
 WDW EM  
 SSB 0  
 LB 0.30 Hz  
 GB 0  
 PC 0.60

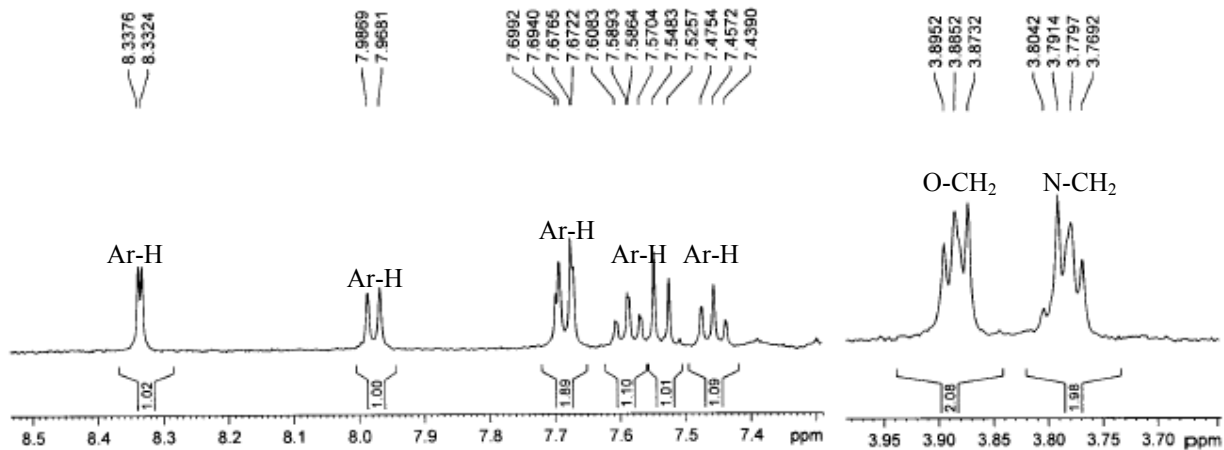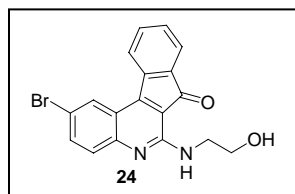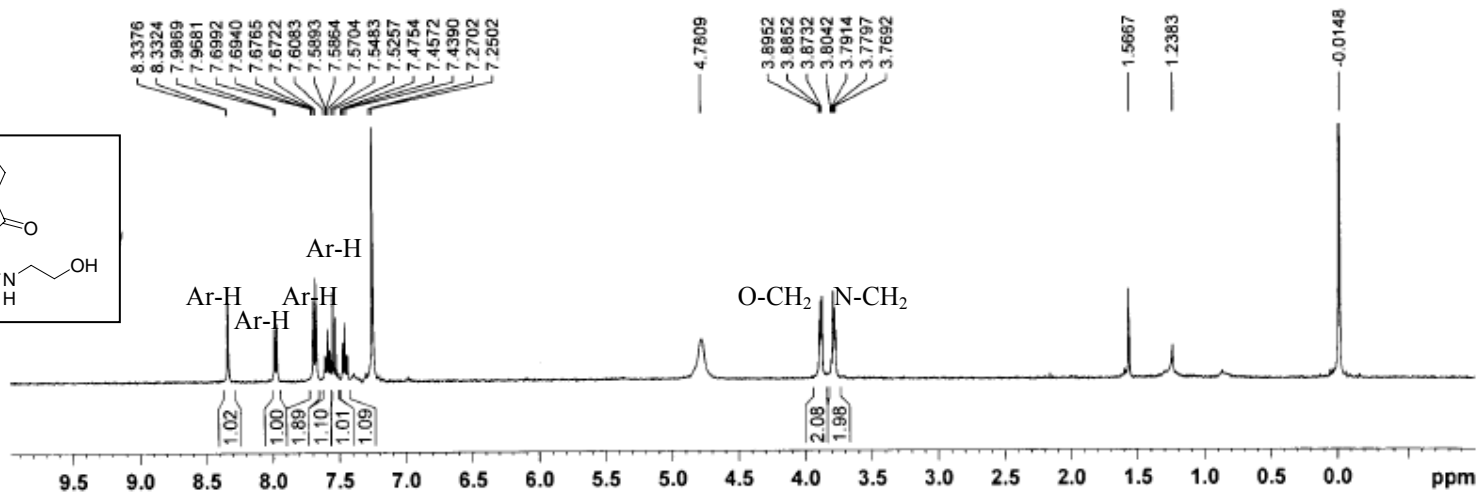

2009-06-11



**\_CR080-67-163-163A IN DMSO -CMR**

Current Data Parameters  
NAME CR080-67-163-163A  
EXPNO 1  
PROCNO 1

F2 - Acquisition Parameters  
Date\_ 20091126  
Time 20.56  
INSTRUM spect  
PROBHD 5 mm DUL 13C-1  
PULPROG zgpg30  
TD 65536  
SOLVENT DMSO  
NS 12303  
DS 4  
SWH 23980.814 Hz  
FIDRES 0.365918 Hz  
AQ 1.3664756 sec  
RG 1824.6  
DW 20.850 usec  
DE 6.00 usec  
TE 295.6 K  
D1 2.00000000 sec  
d11 0.03000000 sec  
DELTA 1.89999998 sec  
TD0 1

===== CHANNEL f1 =====  
NUC1 13C  
P1 7.90 usec  
PL1 -2.00 dB  
SFO1 100.6228298 MHz

===== CHANNEL f2 =====  
CPDPRG2 waltz16  
NUC2 1H  
PCPD2 100.00 usec  
PL2 -1.00 dB  
PL12 14.92 dB  
PL13 18.92 dB  
SFO2 400.1316005 MHz

F2 - Processing parameters  
SI 32768  
SF 100.6128630 MHz  
WDW EM  
SSB 0  
LB 8.00 Hz  
GB 0  
PC 0.20

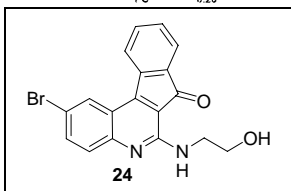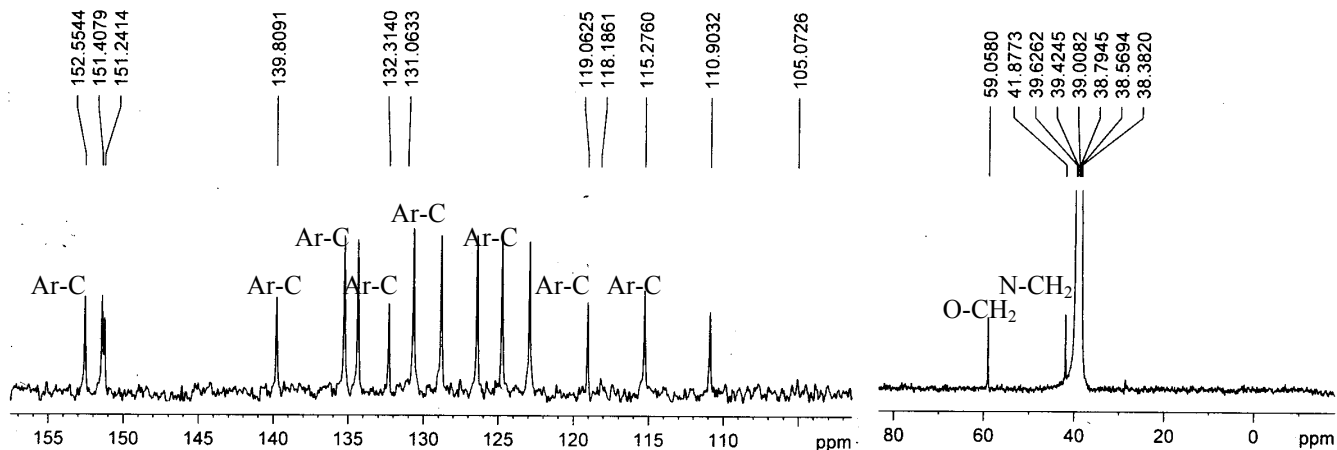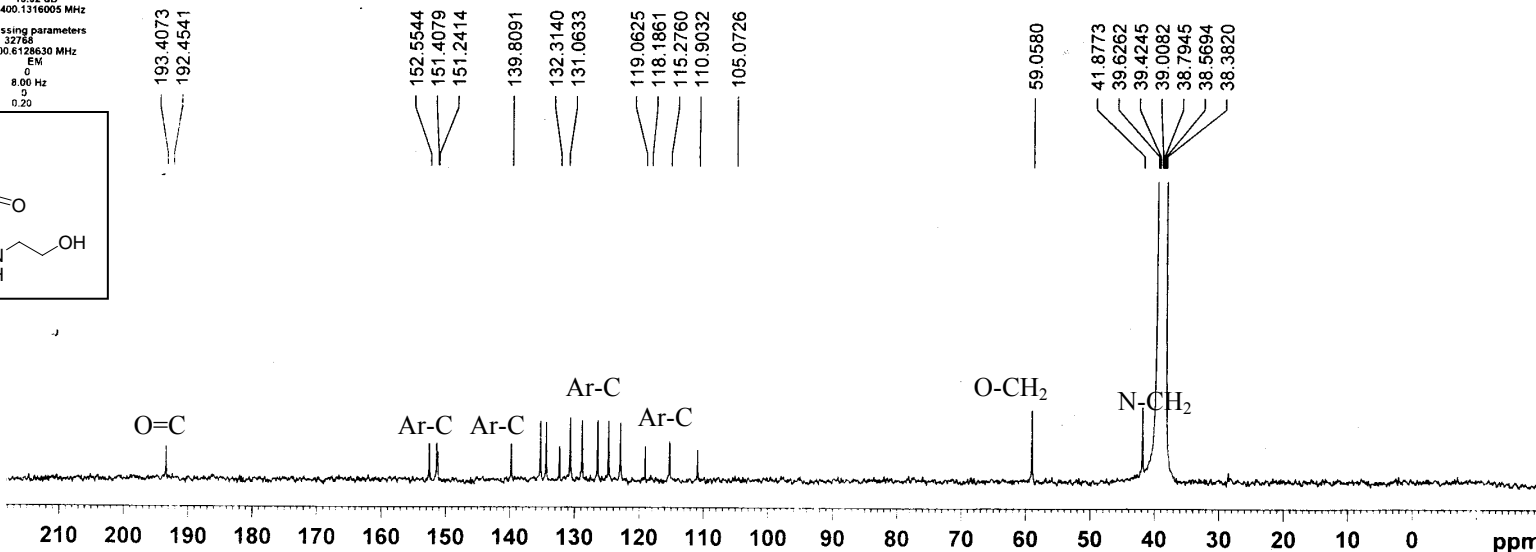

Current Data Parameters  
 NAME CR80-01-103-103A  
 ERPHO  
 PROCNO 1  
 F2 - Acquisition Parameters  
 Date\_ 20160221  
 Time 20:59  
 INSTRUM spect  
 PROBNM 5 mm BBL 13C-1  
 PULPROG zgpg30  
 TO 65535  
 SOLVENT DMSO  
 NS 11200  
 DS 4  
 SWH 22990.816 Hz  
 FIDRES 0.365418 Hz  
 AQ 1.3664750 sec  
 RG 9195.2  
 DW 20.050 usec  
 DE 5.00 usec  
 TE 302.4 K  
 CN272 145.6000000  
 D1 2.0000000 sec  
 d5 0.00318020 sec  
 d12 0.0000000 sec  
 DELTA 0.6000000 sec  
 TD 1

===== CHANNEL F1 =====  
 NUC1 13C  
 P1 7.00 usec  
 PL1 15.00 dB  
 SFO1 101.623298 MHz

===== CHANNEL G2 =====  
 CPOPRG2 waltz16  
 NUC2 1H  
 P2 12.00 usec  
 PL2 25.00 dB  
 PCPO2 -90.00 usec  
 PL2 -1.00 dB  
 PL12 54.92 dB  
 SFO2 400.1219000 MHz

F2 - Processing parameters  
 SF 32768  
 GP 102.6120619 MHz  
 WDW EM  
 SSB 0  
 LB 0.00 Hz  
 GB 0  
 PC 0.26

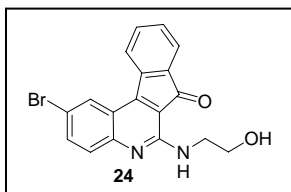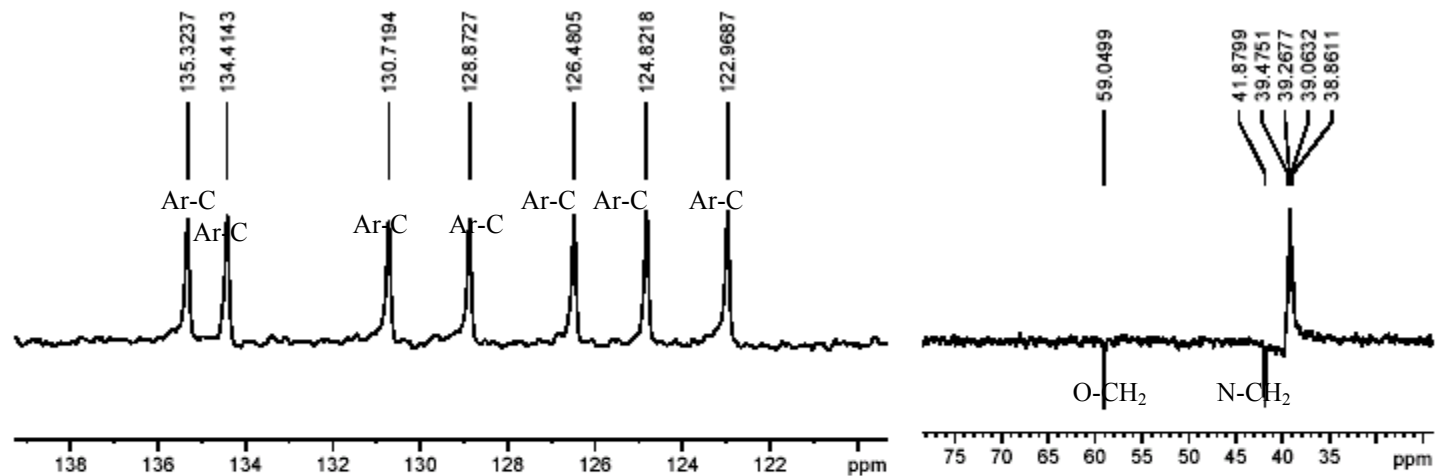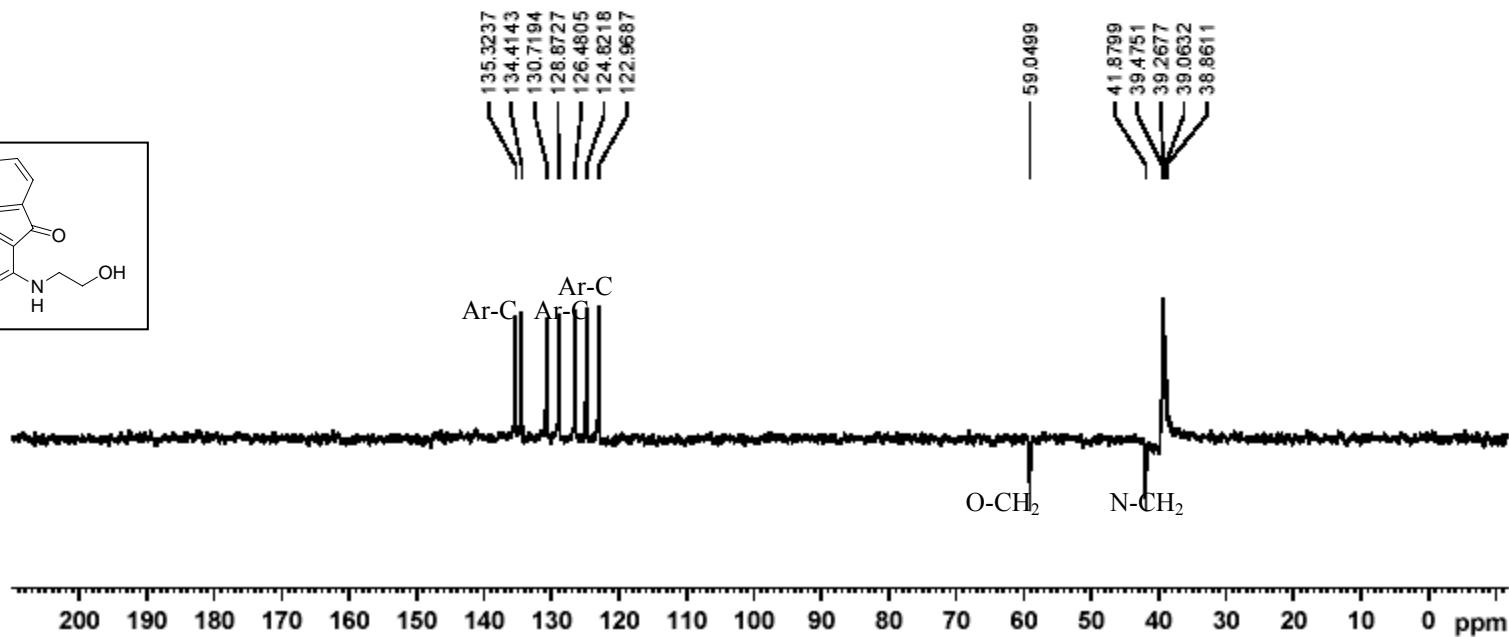

\*

Sample Name: CR080-67-163-163A

INDIA  
Acq. Time: 12:27

Acq. Date: Friday, March 12, 2010

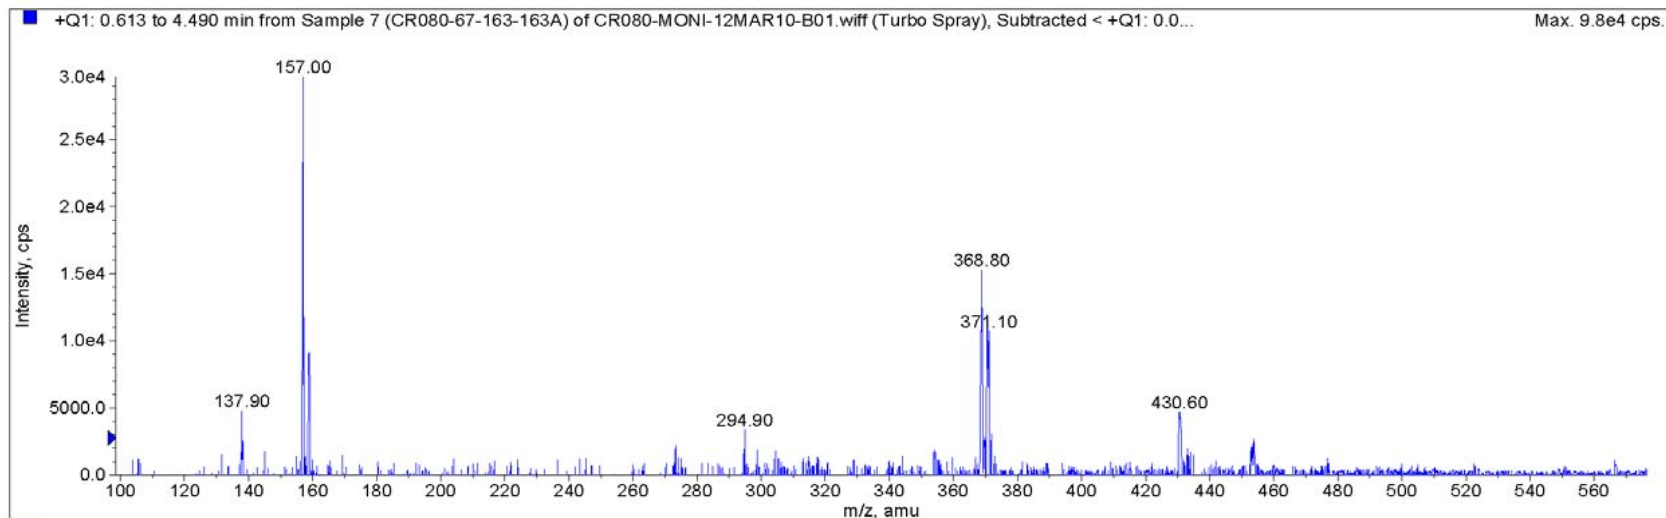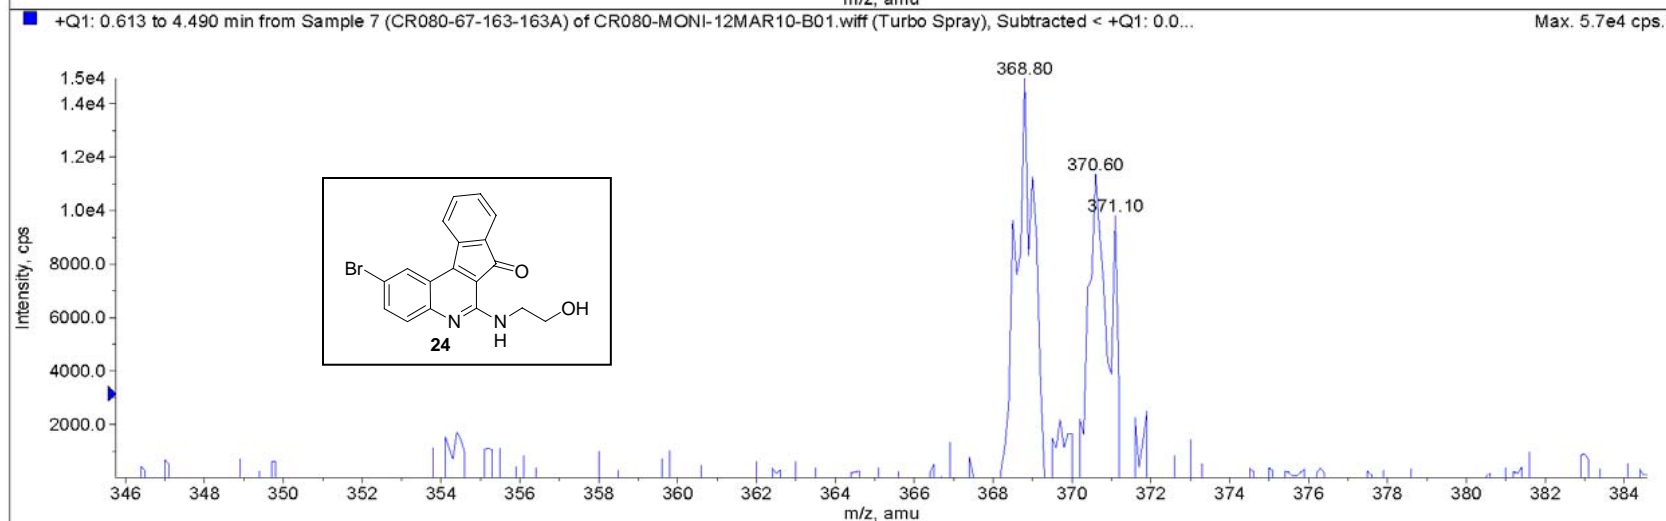

\*Sample Comment: [M+H]

Expected 369

\*\*Analyzed By :

\*\*Checked By :

Sample Name: CR080-67-163-163A [1711462] Acq. Time: 13:50 Acq. Date: Wednesday, June 10, 2009

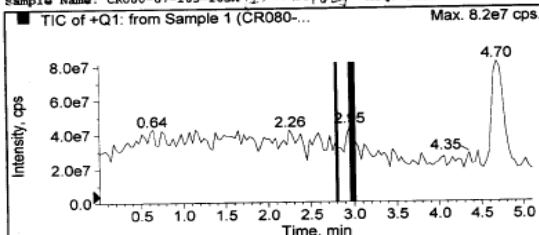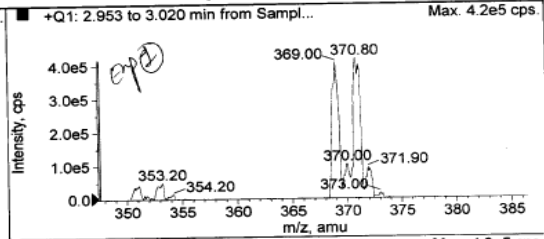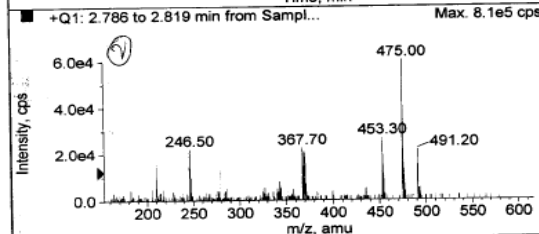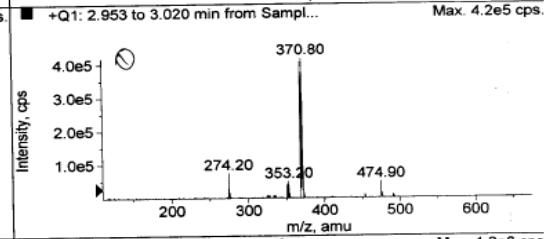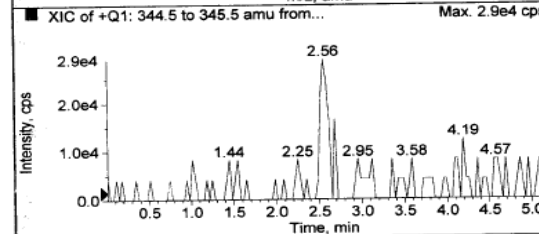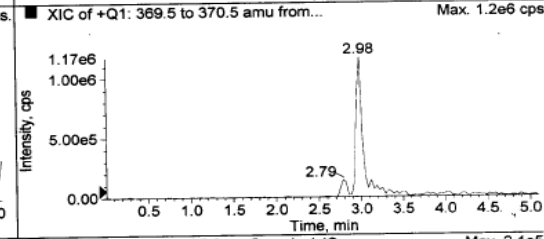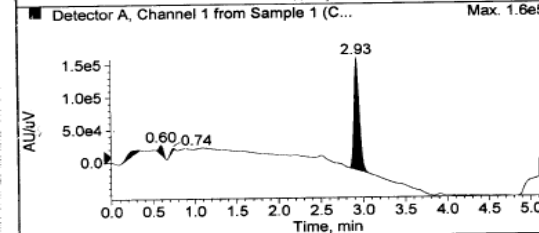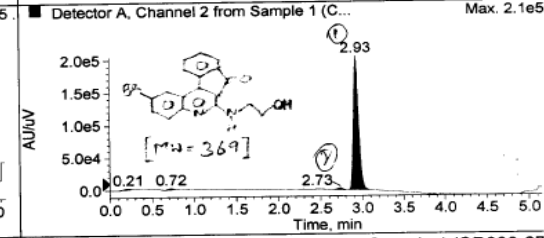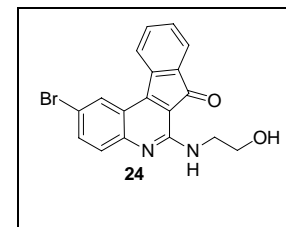

Peak List for "Detector A, Channel 1 from Sample 1 (CR080-67-163-163A)"

| Time (min) | Area (counts) | % Area  | Height    |
|------------|---------------|---------|-----------|
| 0.3231     | 6.2168e4      | 6.8468  | 2110.8398 |
| 0.5962     | 5.0731e4      | 5.5872  | 1.4327e4  |
| 0.7439     | 1.1911e4      | 1.3118  | 2865.3704 |
| 2.9297     | 7.8319e5      | 86.2542 | 1.7317e5  |

Peak List for "Detector A, Channel 2 from Sample 1 (CR080-67-163-163A)"

| Time (min) | Area (counts) | % Area  | Height    |
|------------|---------------|---------|-----------|
| 0.2142     | 1.0920e4      | 1.0989  | 2103.3701 |
| 0.7234     | 1.0999e4      | 1.1069  | 2576.3264 |
| 2.7335     | 1.5328e4      | 1.5426  | 3030.4582 |
| 2.9303     | 9.5643e5      | 96.2516 | 2.0715e5  |

1711462-1 Reaction Monitoring (TFA Buffer)  
 Channel 1 at wavelength 220 nm, Channel 2 at wavelength 260 nm

Analyzed By: [Signature] 10/06/2009

```

=====
Sample:CR080-67-163-163A                                     ->
Column: ZORBAX SB-C18(50X4.6)mm 1.8µ
Injection date   : Fri, 23. Oct. 2009                       Location   :      Vial 21
Sample Name     : CR080-67-163-163A                        Inj. No.   :      1
Acq Operator    : GANESH Z                                  Inj. Vol.  :     10 µl
Analysis Method : C:\CHEM32\2\METHODS\UPLC_GENERAL_GRAD_25.M
Last Changed    : Fri, 23. Oct. 2009,
Acq. Method     :C:\Chem32\2\DATA\OCT-09\231009E 2009-10-23 11-54-41\
                  UPLC_GENERAL_GRAD_25.M
Method ref      : DI/A0257/45
=====

```

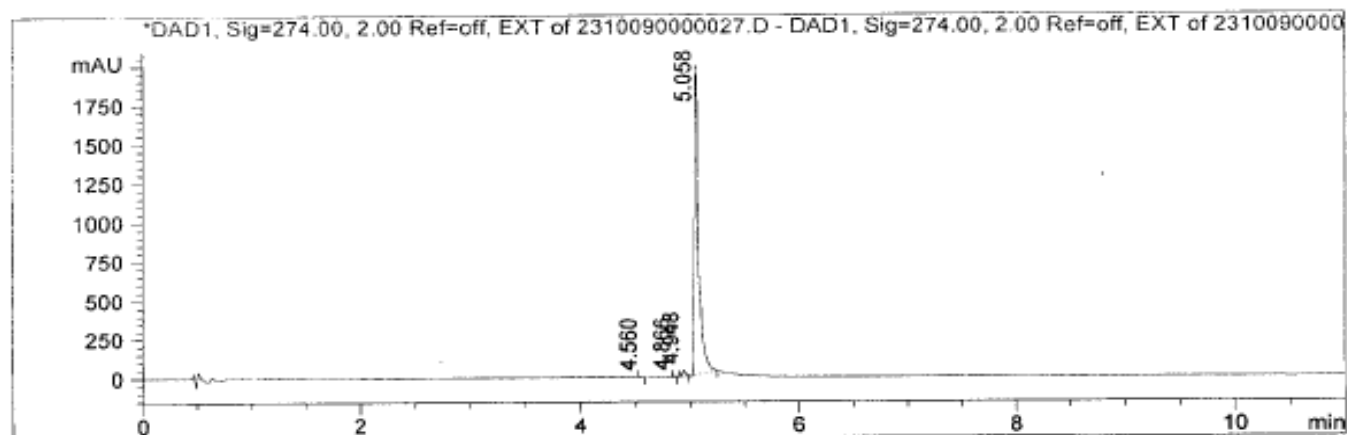

DAD1, Sig=274.00, 2.00 Ref=off, EXT

| Peak # | RT (Min) | Width (Min) | Area     | Area % |
|--------|----------|-------------|----------|--------|
| 1      | 4.560    | 0.044       | 14.392   | 0.272  |
| 2      | 4.866    | 0.027       | 12.573   | 0.238  |
| 3      | 4.948    | 0.030       | 76.562   | 1.446  |
| 4      | 5.058    | 0.043       | 5189.865 | 98.044 |

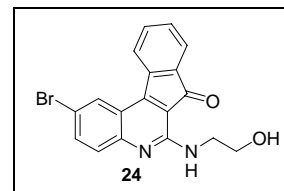

\*\*\* End of Report\*\*\*

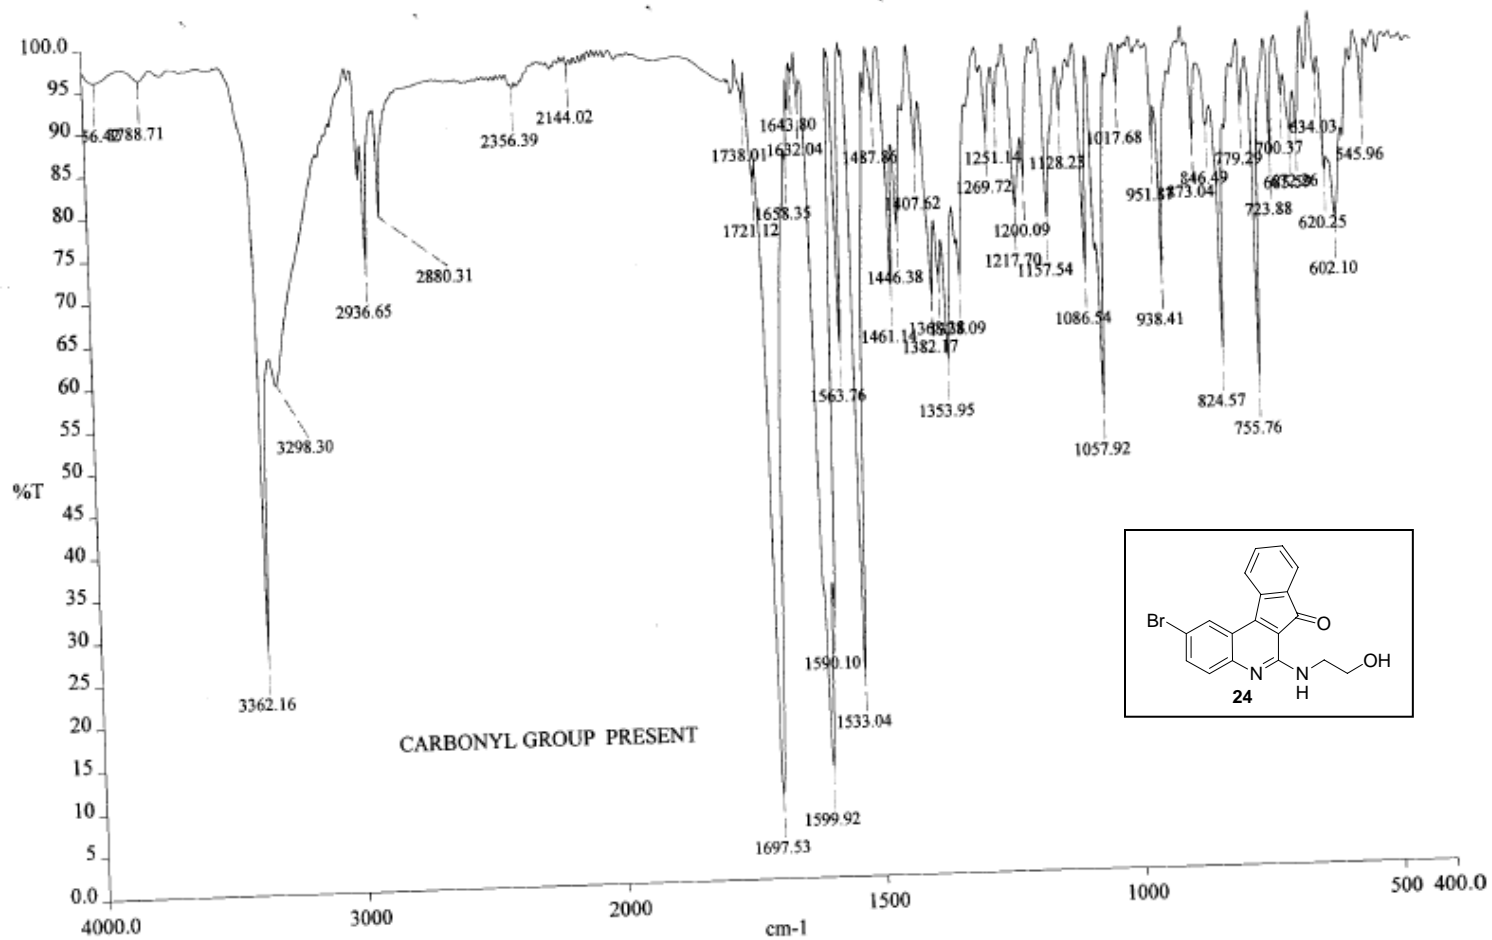

*Good*  
06 Jun 2009

Spectrum Name: CR080-67-163-163A.sp  
Description: CR080-67-163-163A IN KBr

Analyst : GANESH Z

Accumulations: 16

Time: 5:21:48 AM

Resolution: 4.00 cm-1

Date: 7/6/2009

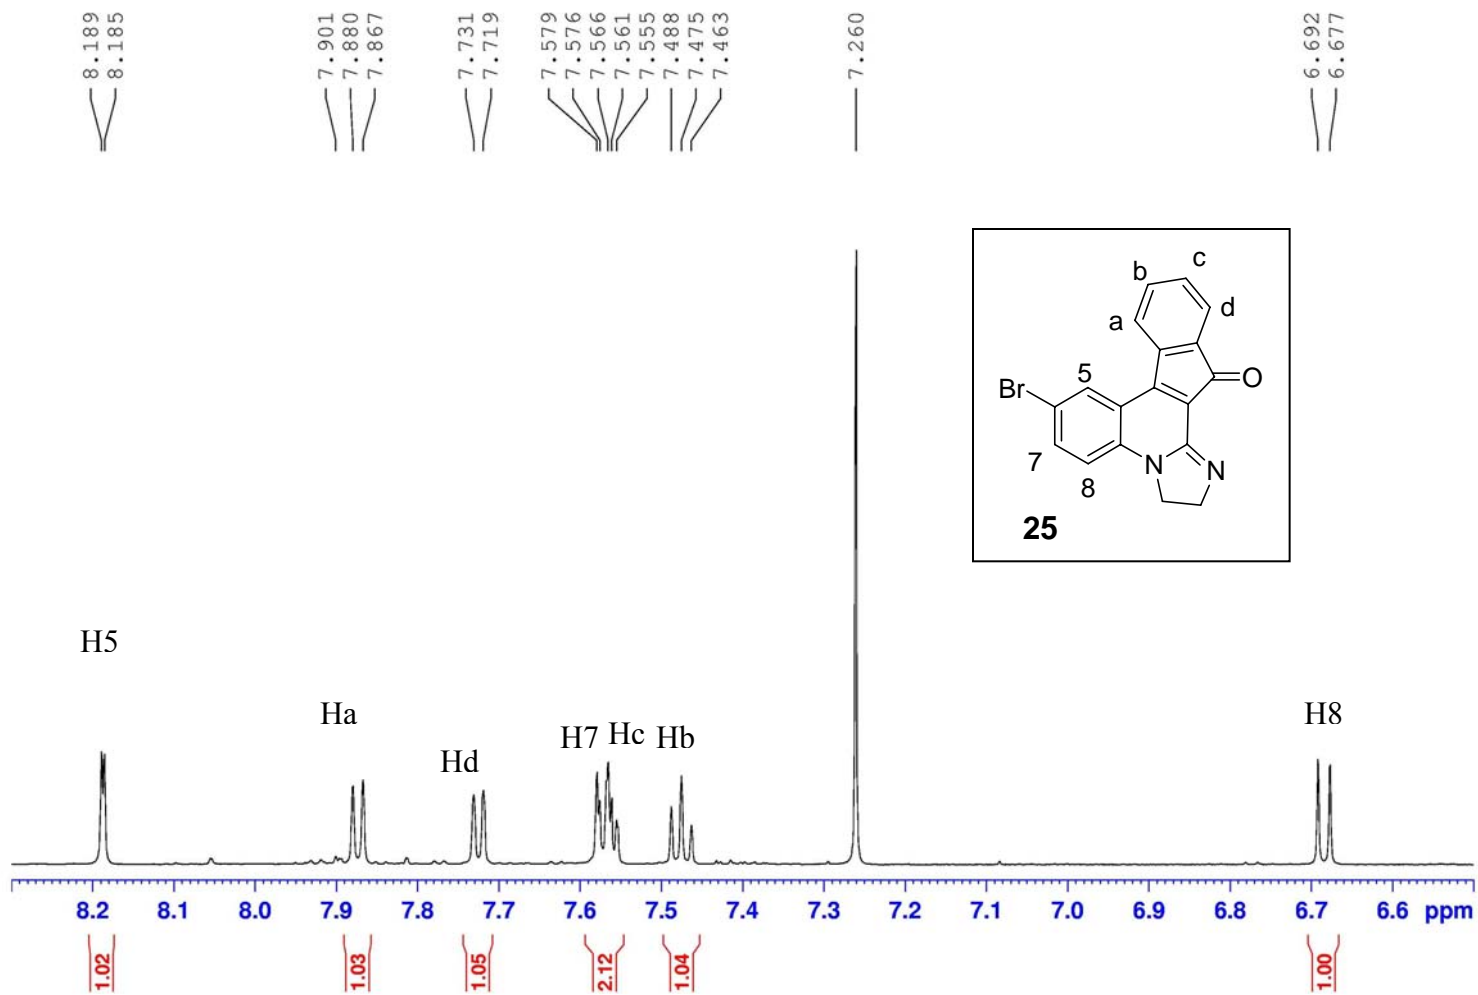

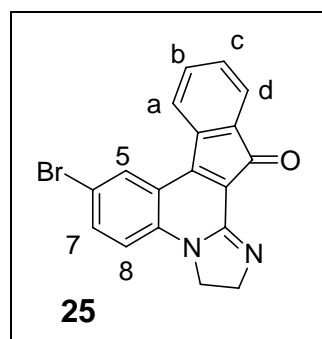

4.264  
4.257  
4.248  
4.230

3.940  
3.923  
3.913  
3.907

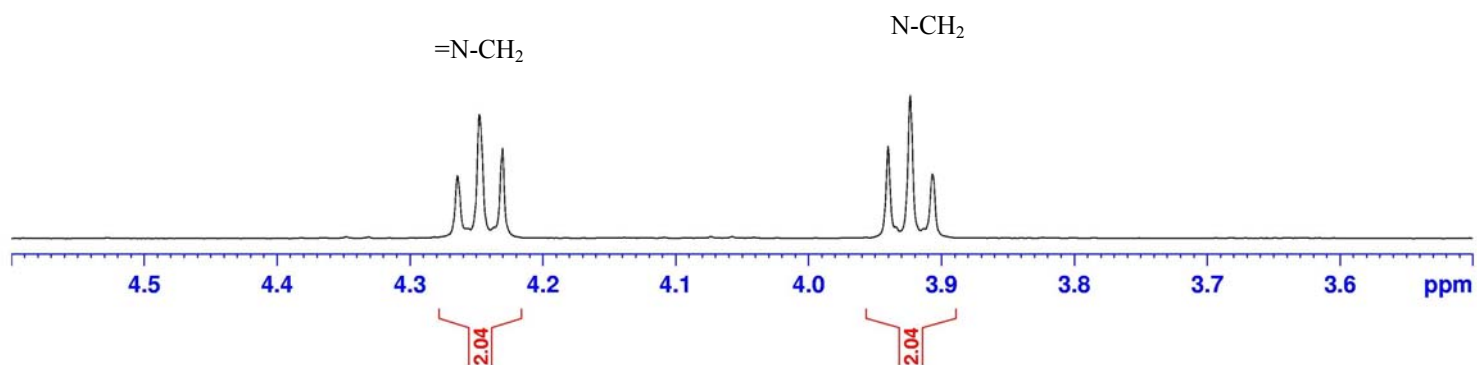



Current Data Parameters  
 NAME CR860-45-45-11A  
 EXPNO 1  
 PROCNO 1  
 F2 - Acquisition Parameters  
 Date\_ 19991212  
 Time 15.38  
 INSTRUM spect  
 PROBHD 5 mm QNP 13C-1  
 PULPROG zgpg30  
 TD 65536  
 SOLVENT DMSO  
 NS 10240  
 DS 4  
 SWH 22862.514 Hz  
 FIDRES 0.365518 Hz  
 AQ 1.2644756 sec  
 RG 258.5  
 DW 25.855 usec  
 DE 8.90 usec  
 EI 292.8 K  
 D1 2.5000000 sec  
 d11 5.5200000 sec  
 DELTA 1.8000000 sec  
 TOR 1  
 ===== CHANNEL f1 =====  
 NUC1 13C  
 P1 7.00 usec  
 PL1 -1.00 dB  
 SFO1 100.626195 MHz  
 ===== CHANNEL f2 =====  
 CPDPRG2 waltz16  
 NUC2 1H  
 PCPD2 100.00 usec  
 PL2 -1.00 dB  
 PL12 14.00 dB  
 PL13 14.00 dB  
 SFO2 400.1516905 MHz  
 F2 - Processing parameters  
 SI 32768  
 SF 100.626195 MHz  
 WDW EM  
 SSB 0  
 LB 0.00 Hz  
 GB 0  
 PC 0.10

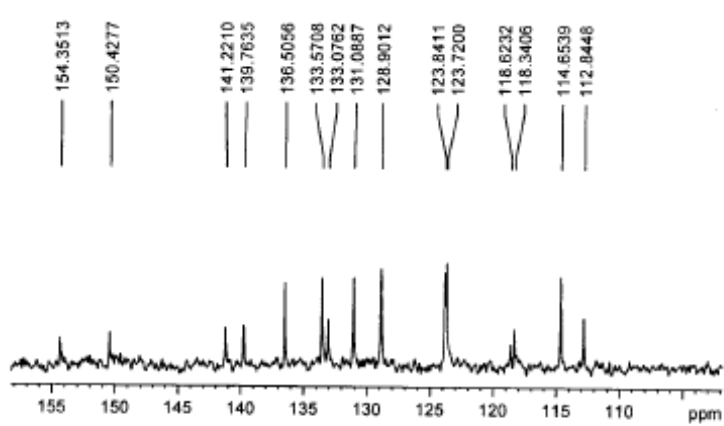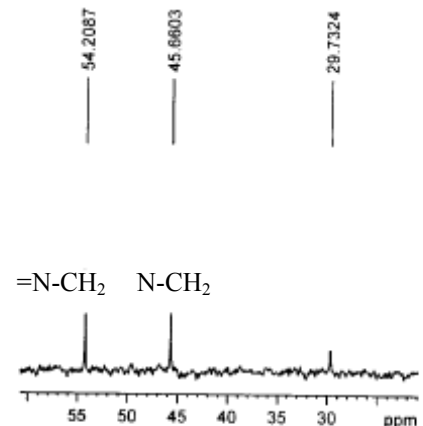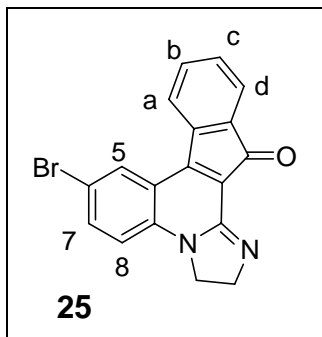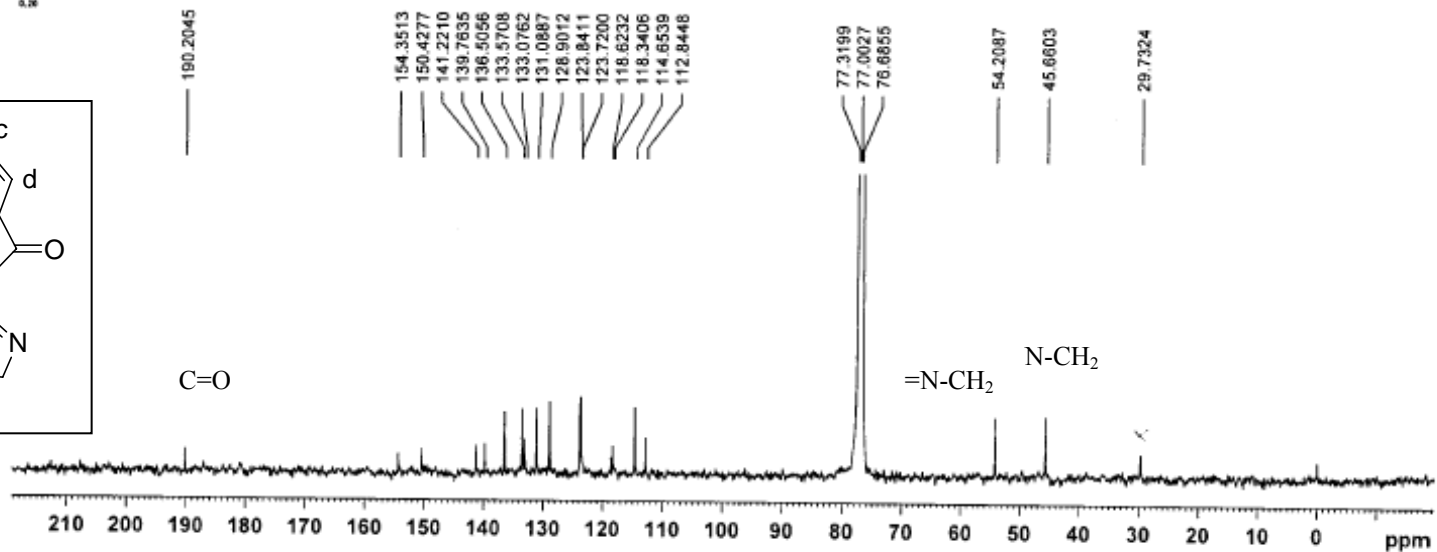

```

Current Data Parameters
NAME: C1808-04-14-1A
EXPNO: 2
PROCNO: 1
F2 - Acquisition Parameters
Date_   : 20031028
Time    : 13:17
INSTRUM : spect
PROBHD  : 5 mm QNP 1H/1
PULPROG : zgpg30
TD      : 65536
SOLVENT : DMSO
NS      : 2072
DS      : 4
SWH     : 22888.814 Hz
FREQ    : 500.137100 MHz
AQ      : 1.1864796 sec
RG      : 3264.0
DQ      : 30.480000000000000
DC      : 0.000000000000000
TE      : 300.2 K
CQV12   : 100.000000000000000
DI      : 2.00000000000000000
AQ      : 0.00000000000000000
RG      : 0.00000000000000000
DELTA   : 0.00000000000000000
TD      : 1
===== CHANNEL f1 =====
NUC1    : 13C
P1      : 7.00000000000000000
PR      : 18.00000000000000000
PL1    : -0.00000000000000000
SFO1   : 101.62812500 MHz
===== CHANNEL f2 =====
CPDPRG2 : waltz16
NUC2    : 15N
P2      : 12.00000000000000000
PR      : 28.20000000000000000
PL2    : 100.00000000000000000
PL3    : -1.00000000000000000
PL12   : 14.00000000000000000
SFO2   : 401.13160000 MHz
F2 - Processing parameters
SI      : 32768
SF      : 101.6107712 MHz
WDW     : EM
SSB     : 0
LB      : 0.00 Hz
GB      : 0
PC      : 0.20

```

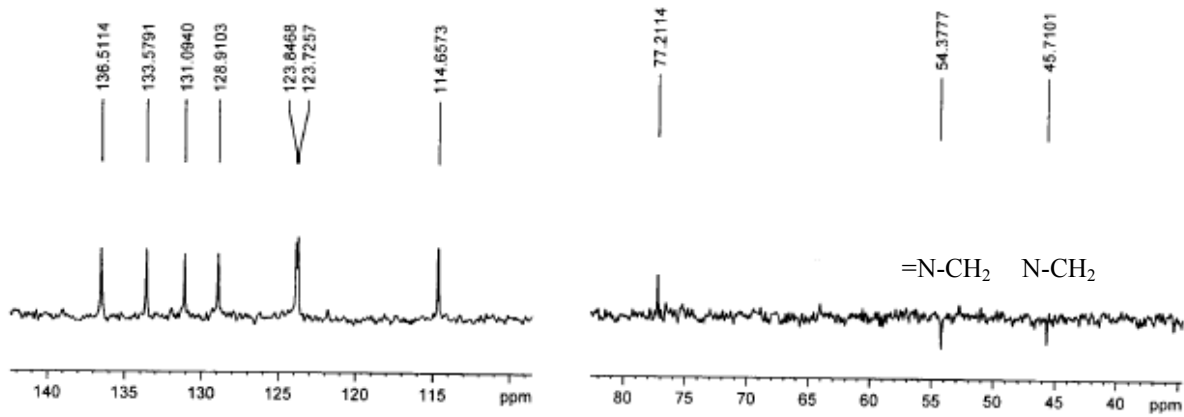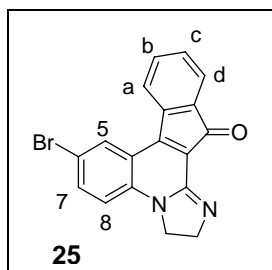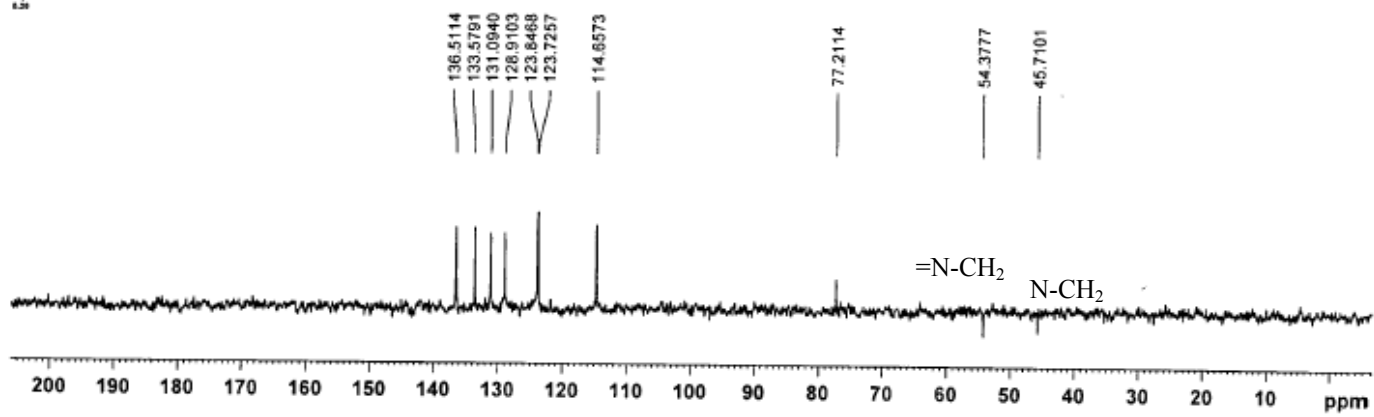

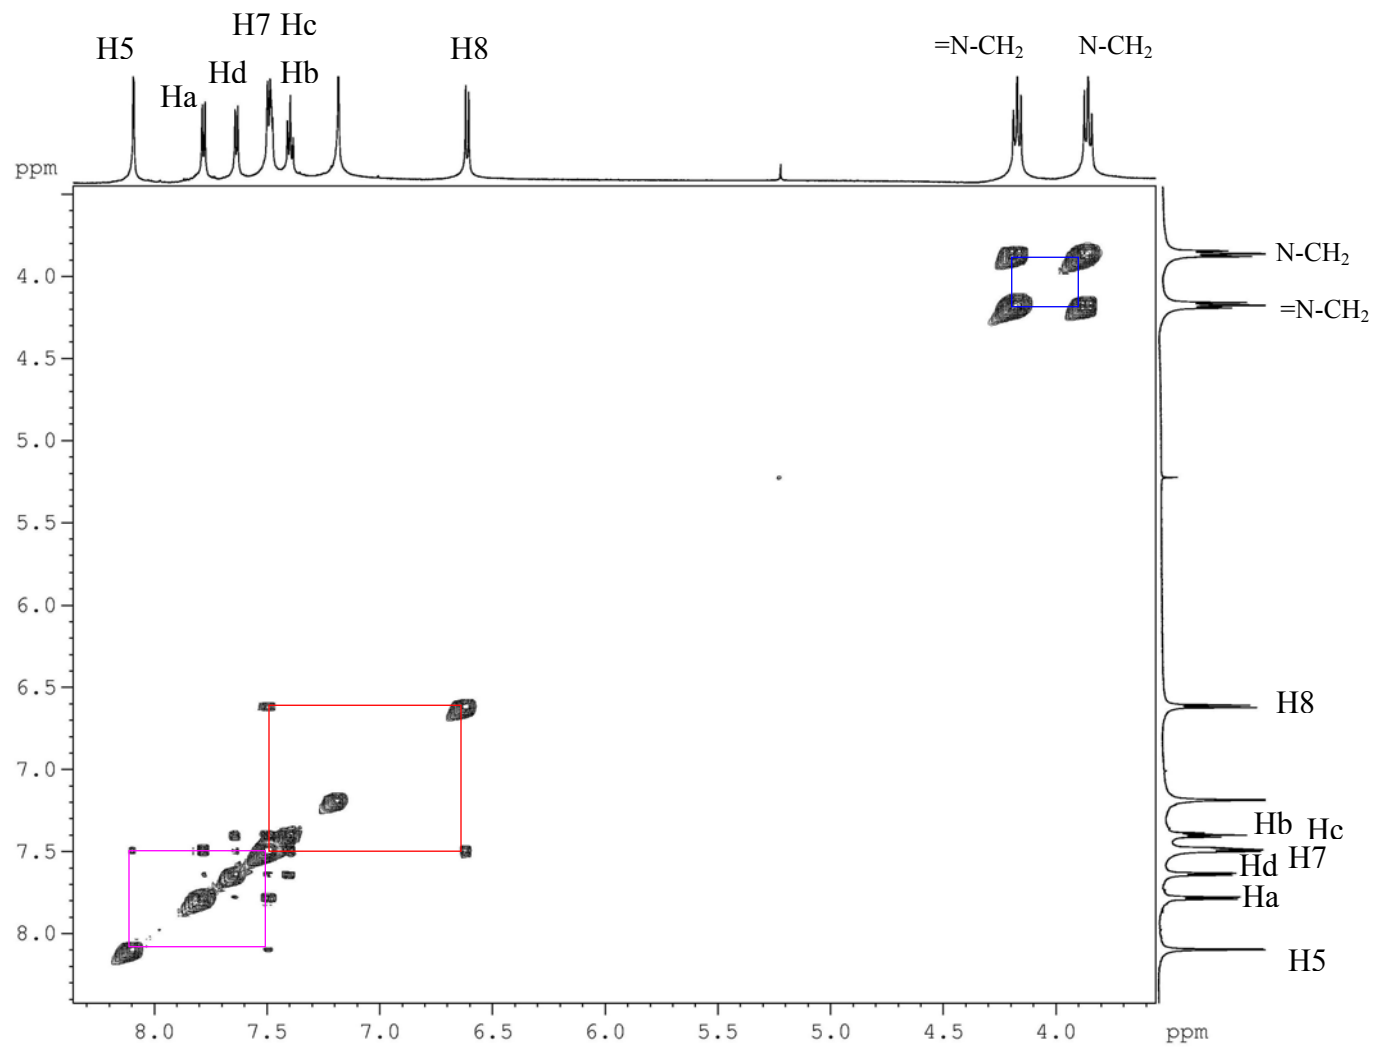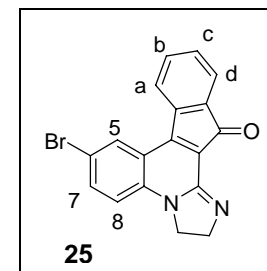

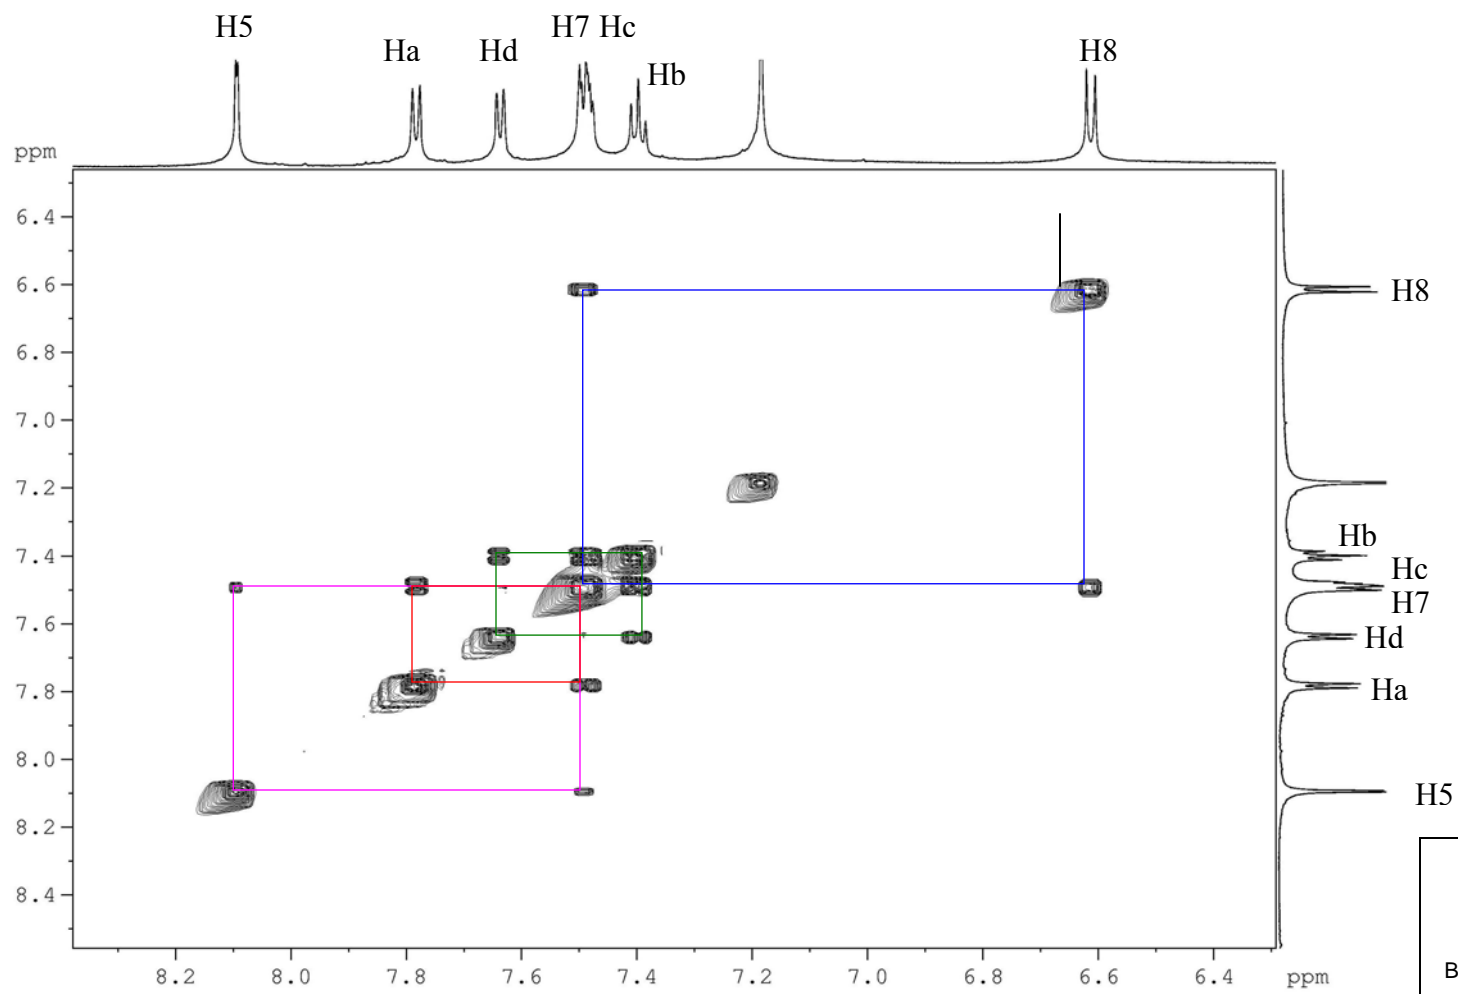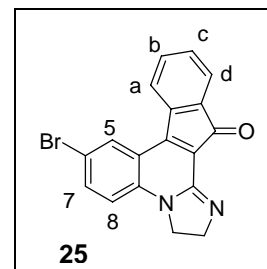

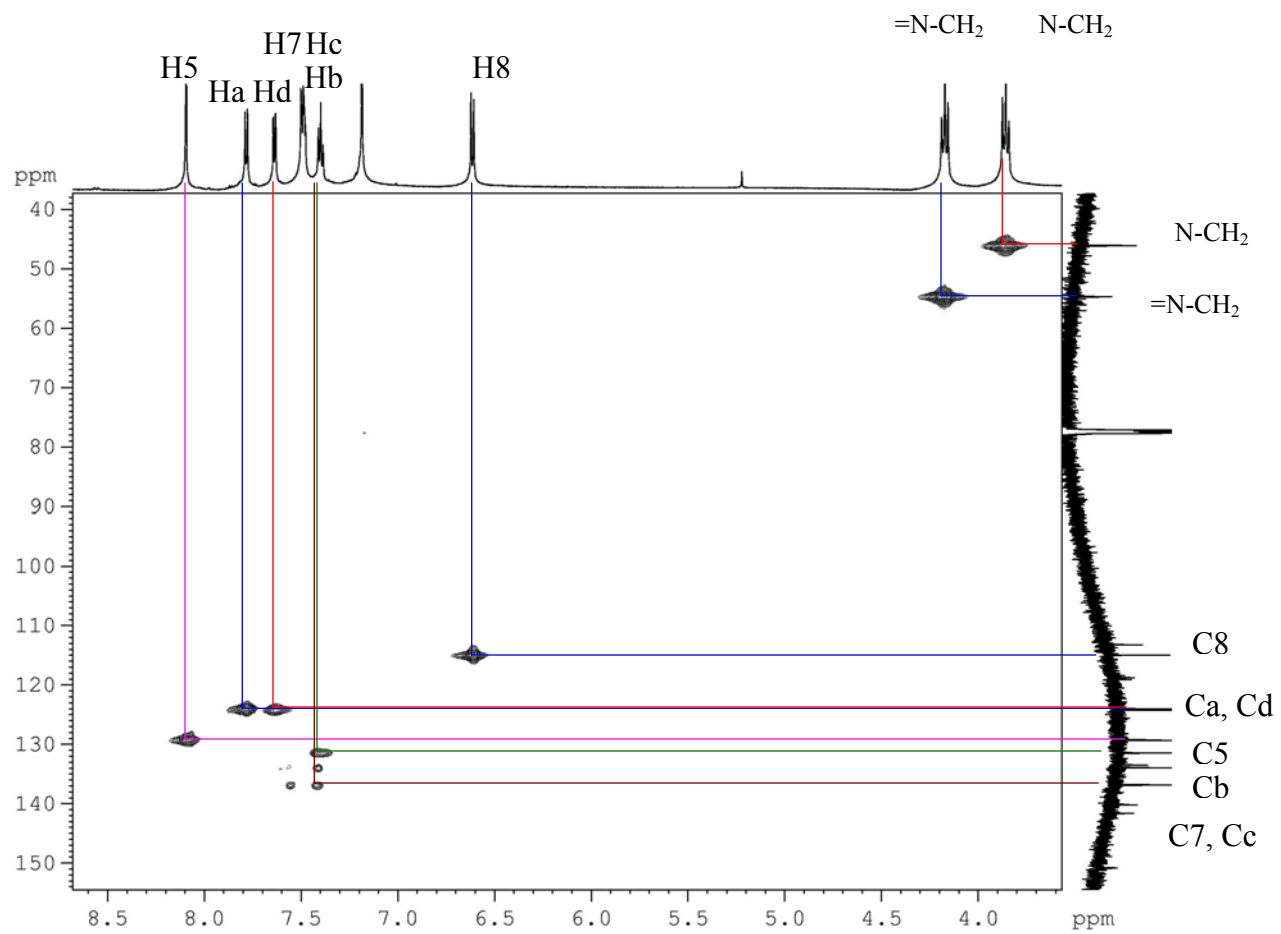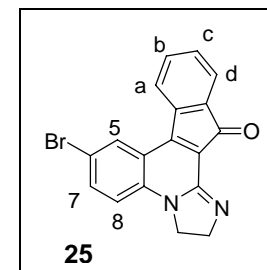

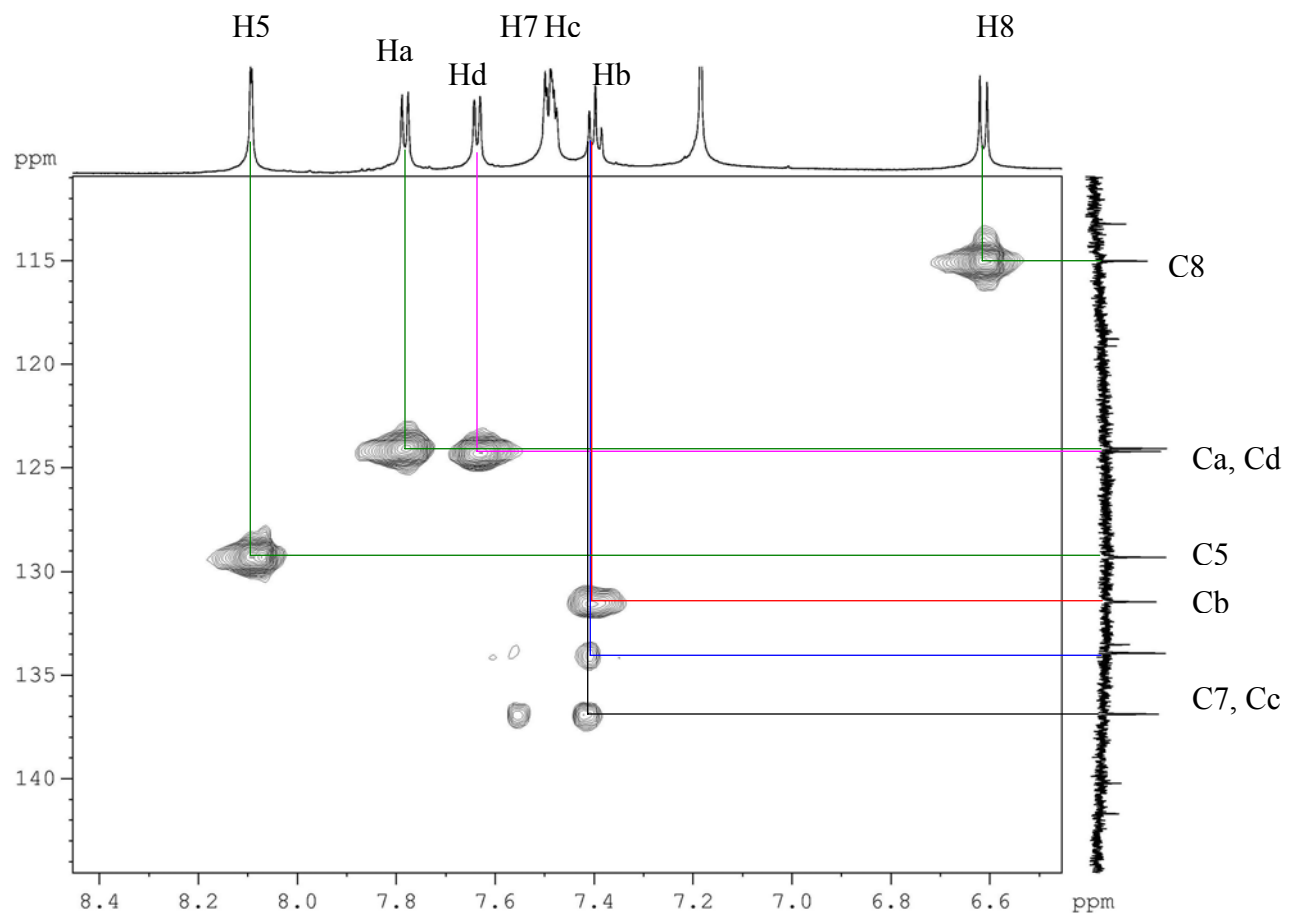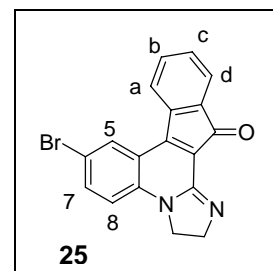

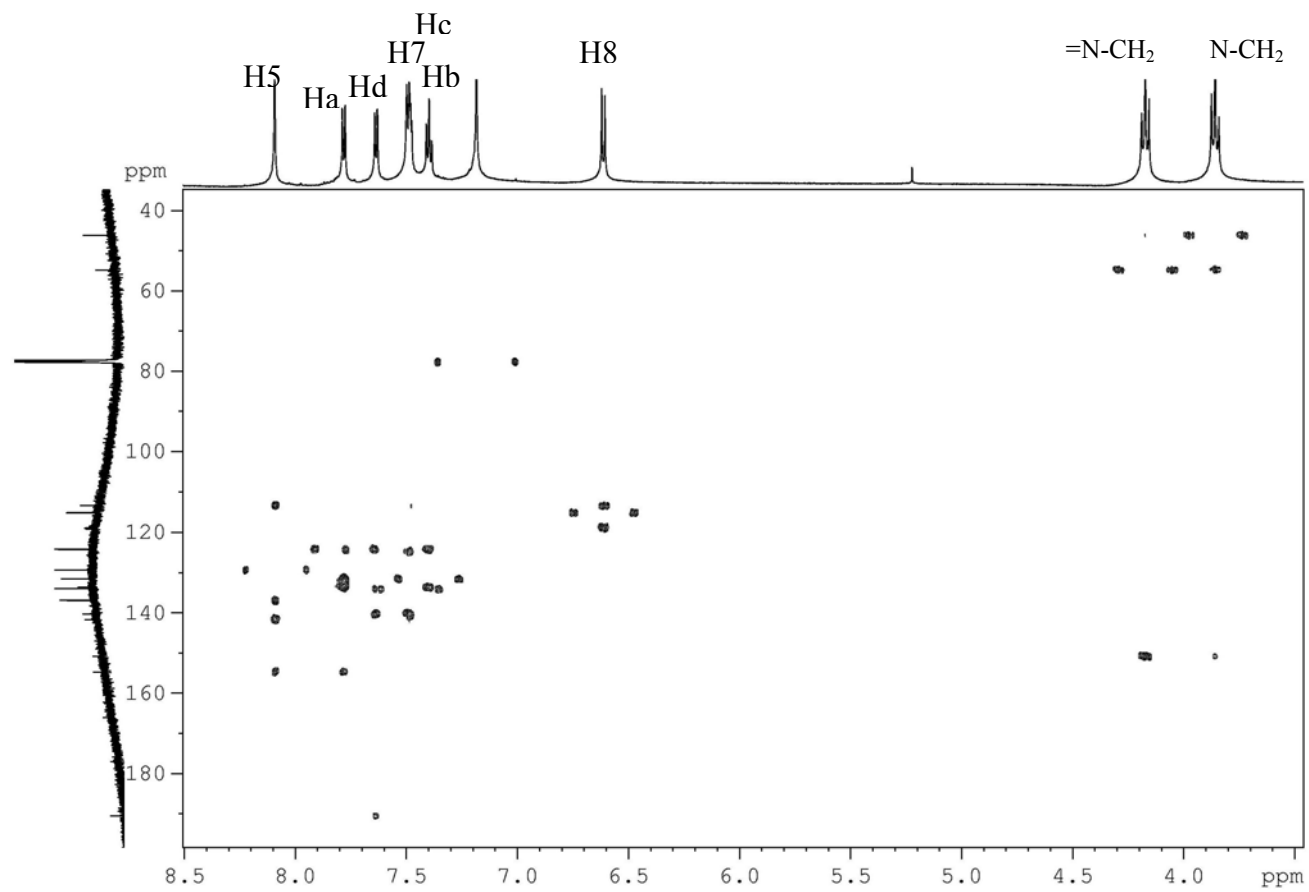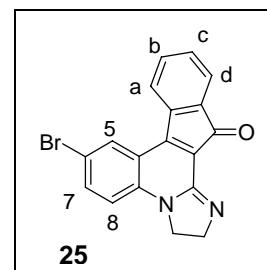

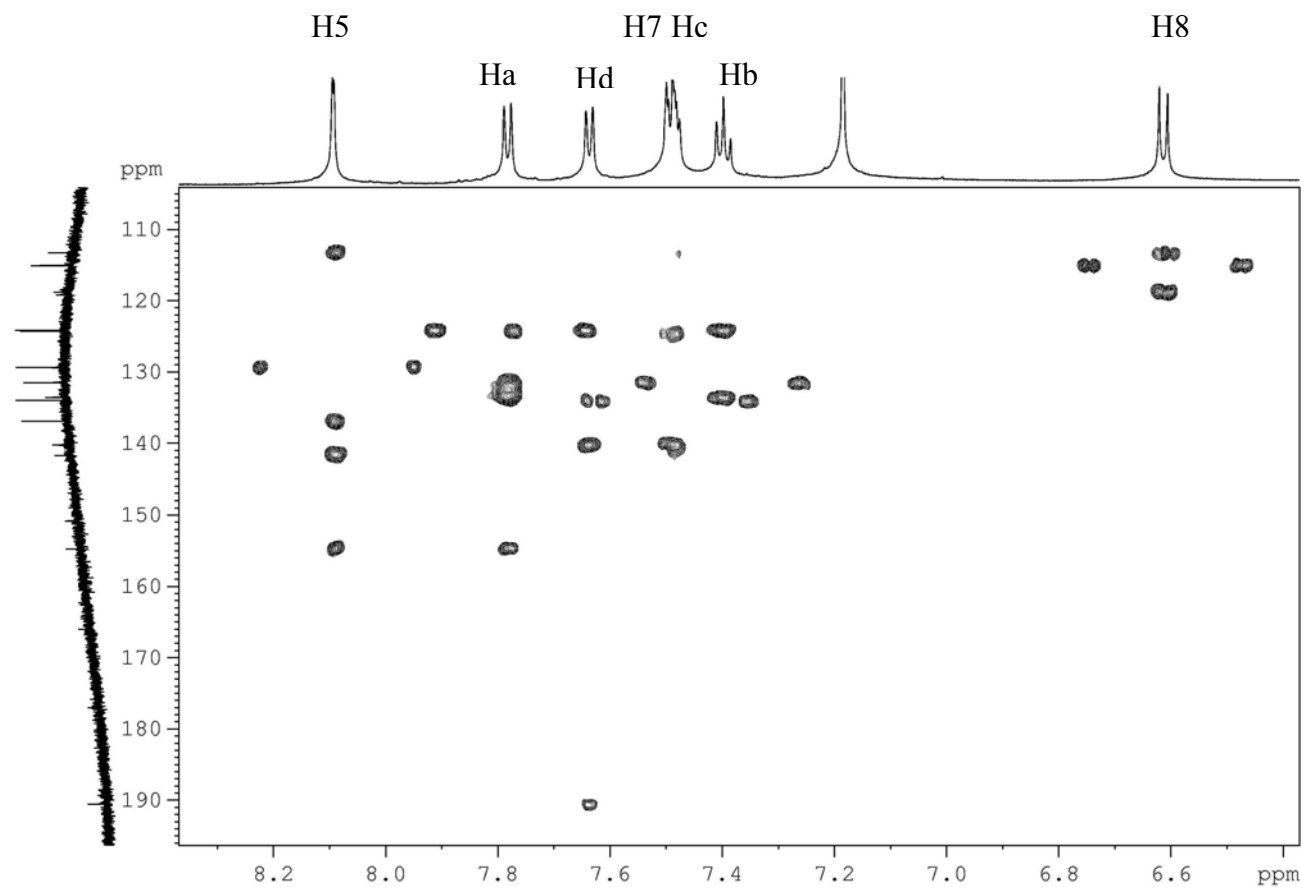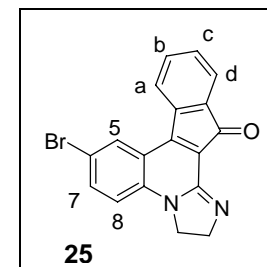



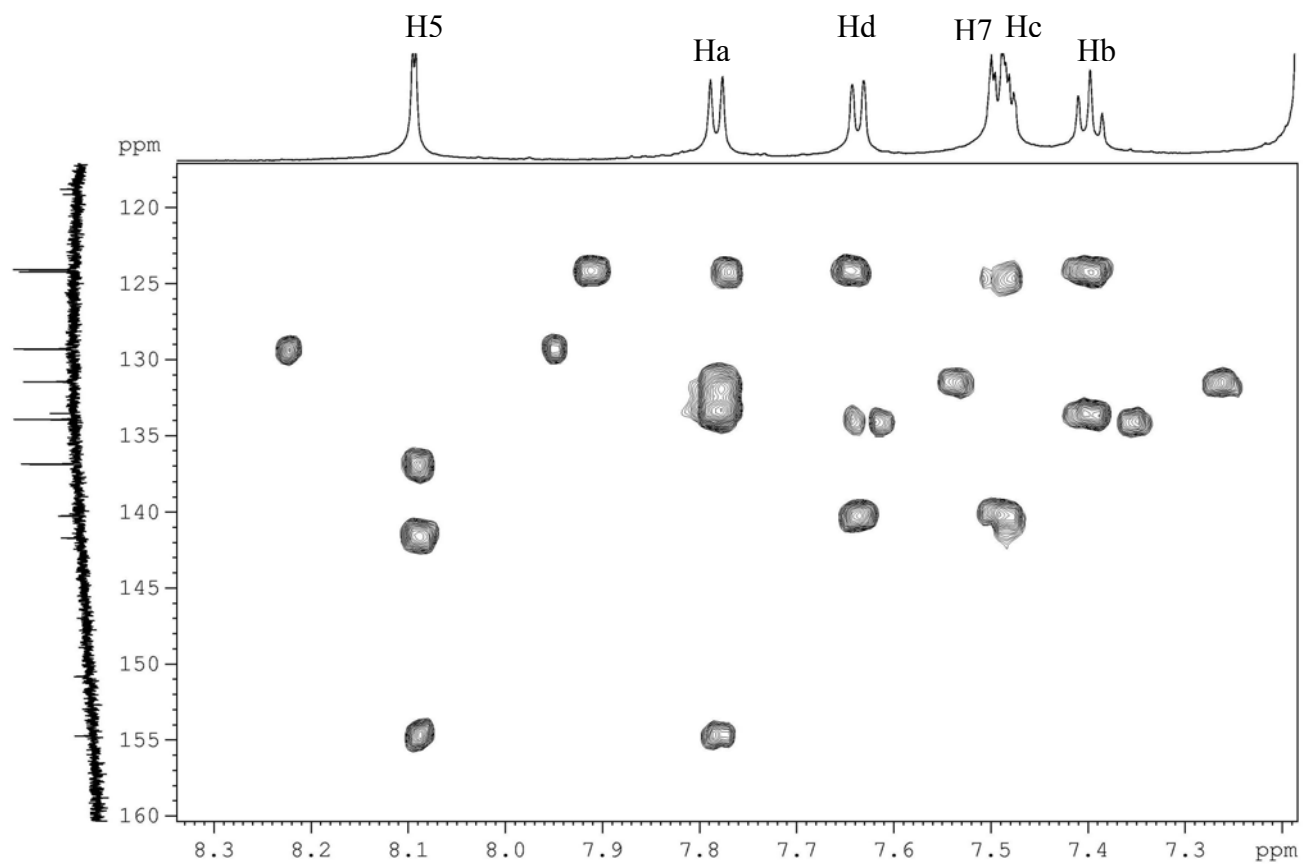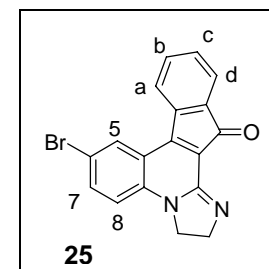

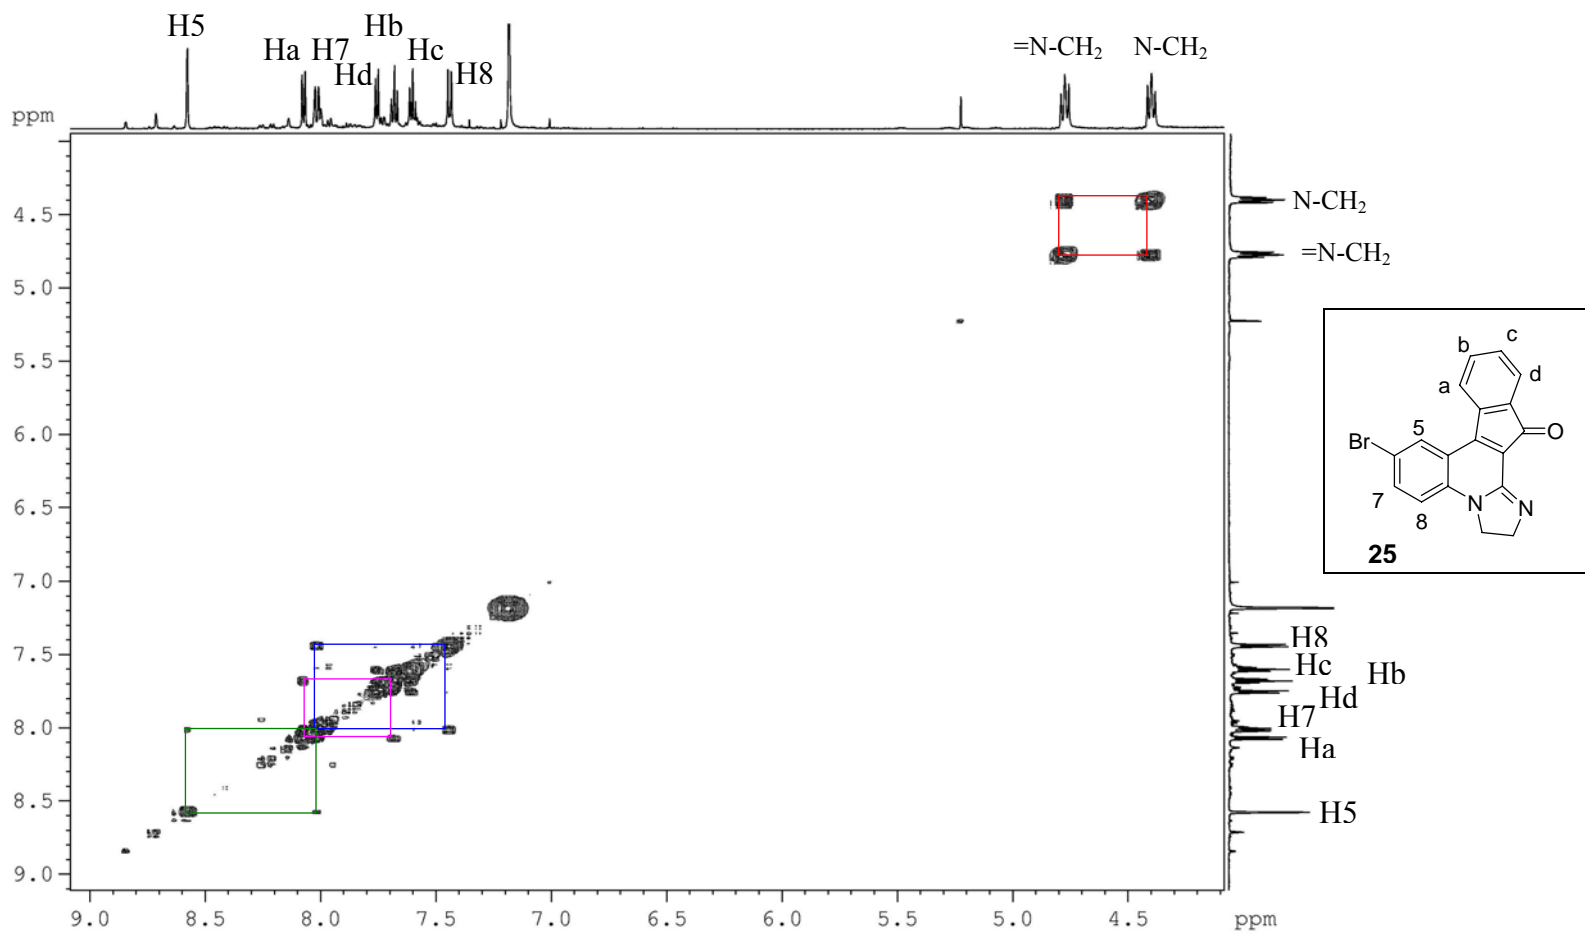

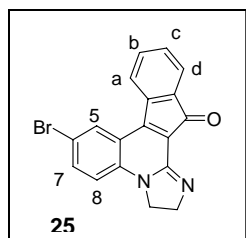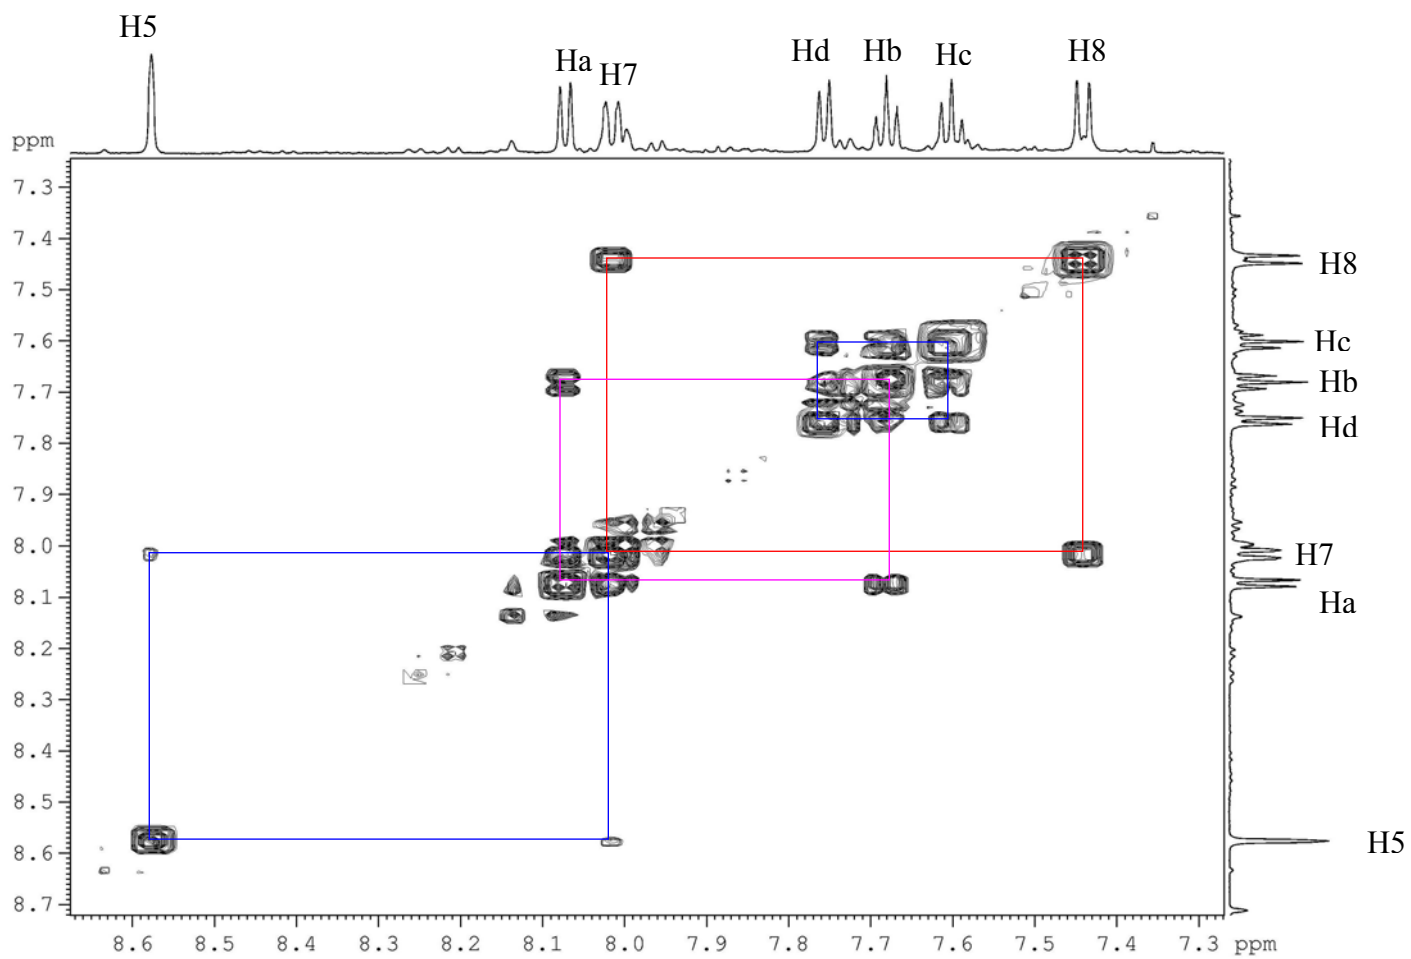

\*

Sample Name: CR080-90-41-41A

INDIA  
Acq. Time: 15:32

Acq. Date: Thursday, October 22, 2009

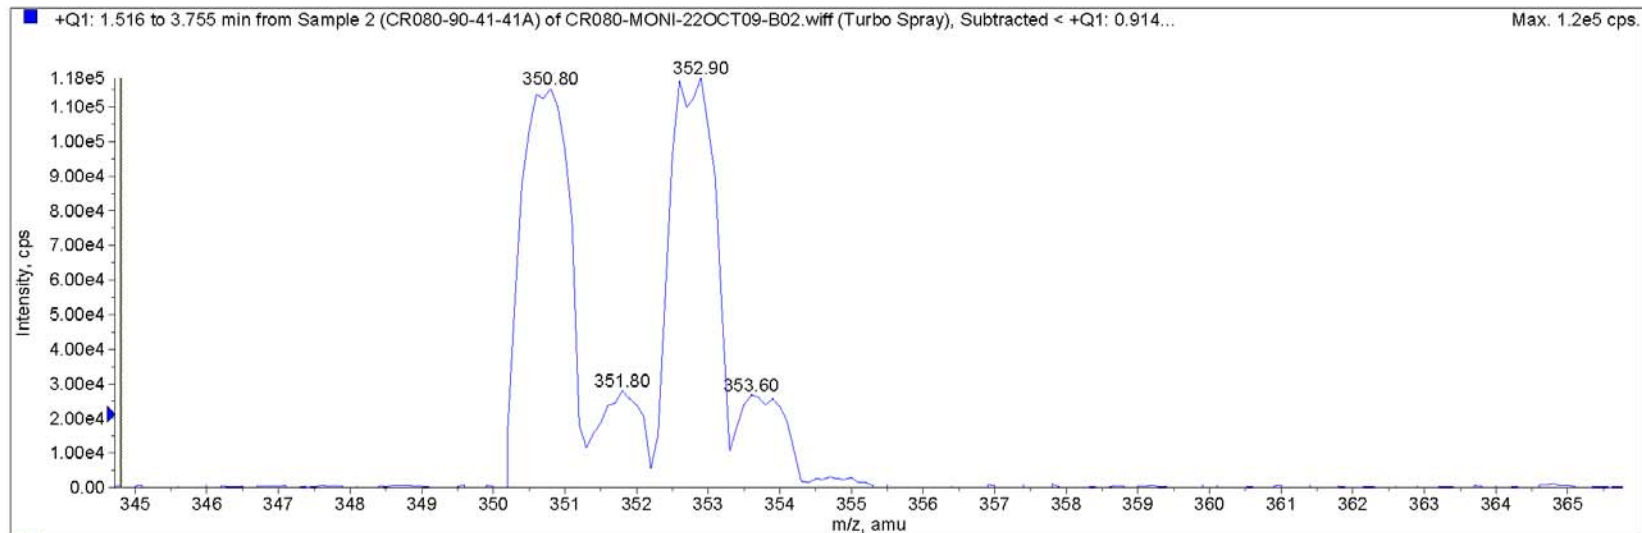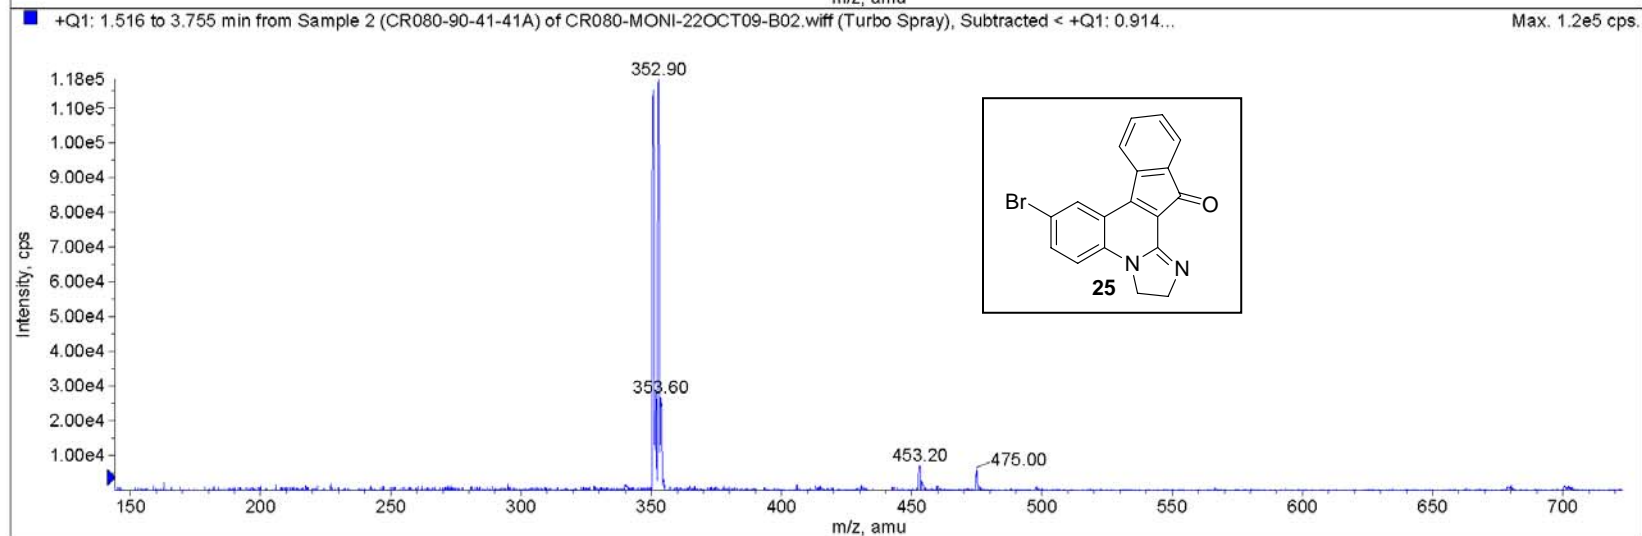

\*Sample Comment: [M+H]351 Expected

\*\*Analyzed By :

\*\*Checked By :

Sample Name: CR080-90-41-41A Acq. Time: 15:32 Acq. Date: Thursday, October 22, 2009

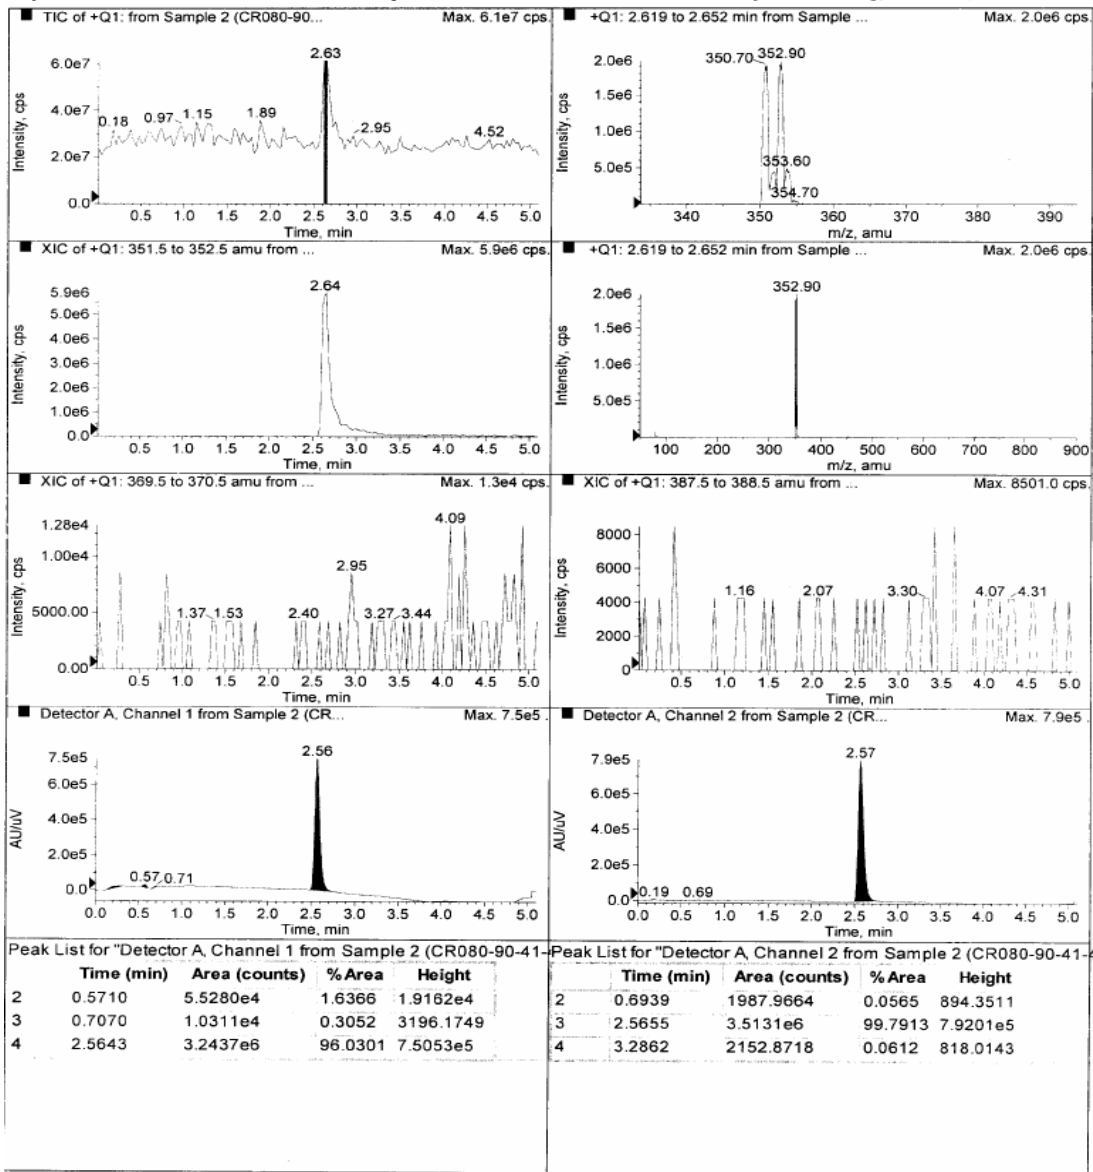

LCMS-1 REACH MONT (TFA Buffer)  
Channel 1 at wavelength 220nm, Channel 2 at wavelength 260 nm

Analysed By :

Sample: CR090-90-41-41A  
 Column: ZORBAX SB-C18 (50X4.6)mm 1.8µ  
 Injection date : Mon, 26. Oct. 2009 Location : Vial 13  
 Sample Name : CR090-90-41-41A Inj. No. : 1  
 Acq Operator : BHUSHAN Inj. Vol. : 5 µl  
 Analysis Method : C:\CHEM32\2\METHODS\UPLC\_GENERAL\_GRAD\_5.M  
 Last Changed : Wed, 21. Oct. 2009,  
 Acq. Method : C:\Chem32\2\DATA\OCT-09\261009C 2009-10-26 11-49-49\  
 UPLC\_GENERAL\_GRAD\_5.M  
 Method ref : DI/A0257/44

| Peak # | RT (Min) | Width (Min) | Area   | Area % |
|--------|----------|-------------|--------|--------|
| 3      | 5.741    | 0.085       | 32.673 | 0.378  |

\*\*\* End of Report\*\*\*

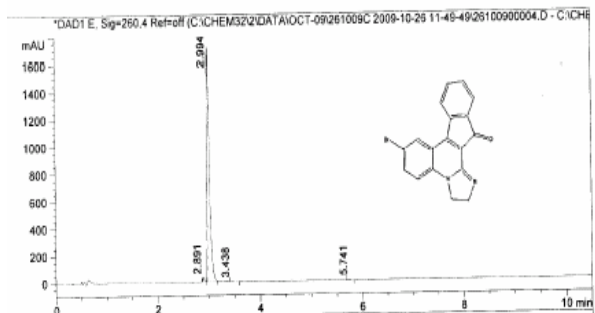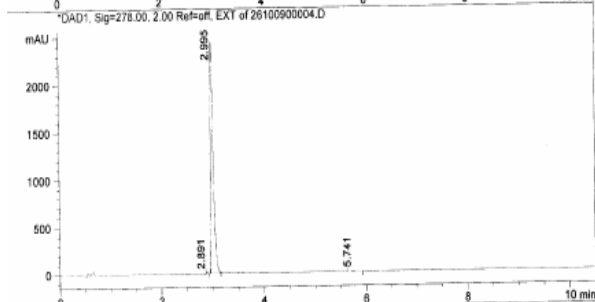

| Peak # | RT (Min) | Width (Min) | Area     | Area % |
|--------|----------|-------------|----------|--------|
| 1      | 2.891    | 0.032       | 56.220   | 0.960  |
| 2      | 2.994    | 0.056       | 5776.617 | 98.623 |
| 3      | 3.438    | 0.061       | 7.964    | 0.136  |
| 4      | 5.741    | 0.069       | 16.446   | 0.281  |

DAD1, Sig=278.00, 2.00 Ref=off, EXT

| Peak # | RT (Min) | Width (Min) | Area     | Area % |
|--------|----------|-------------|----------|--------|
| 1      | 2.891    | 0.029       | 17.050   | 0.197  |
| 2      | 2.995    | 0.058       | 8586.340 | 99.424 |

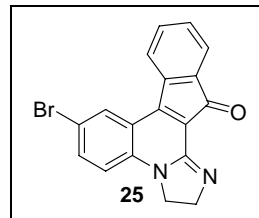

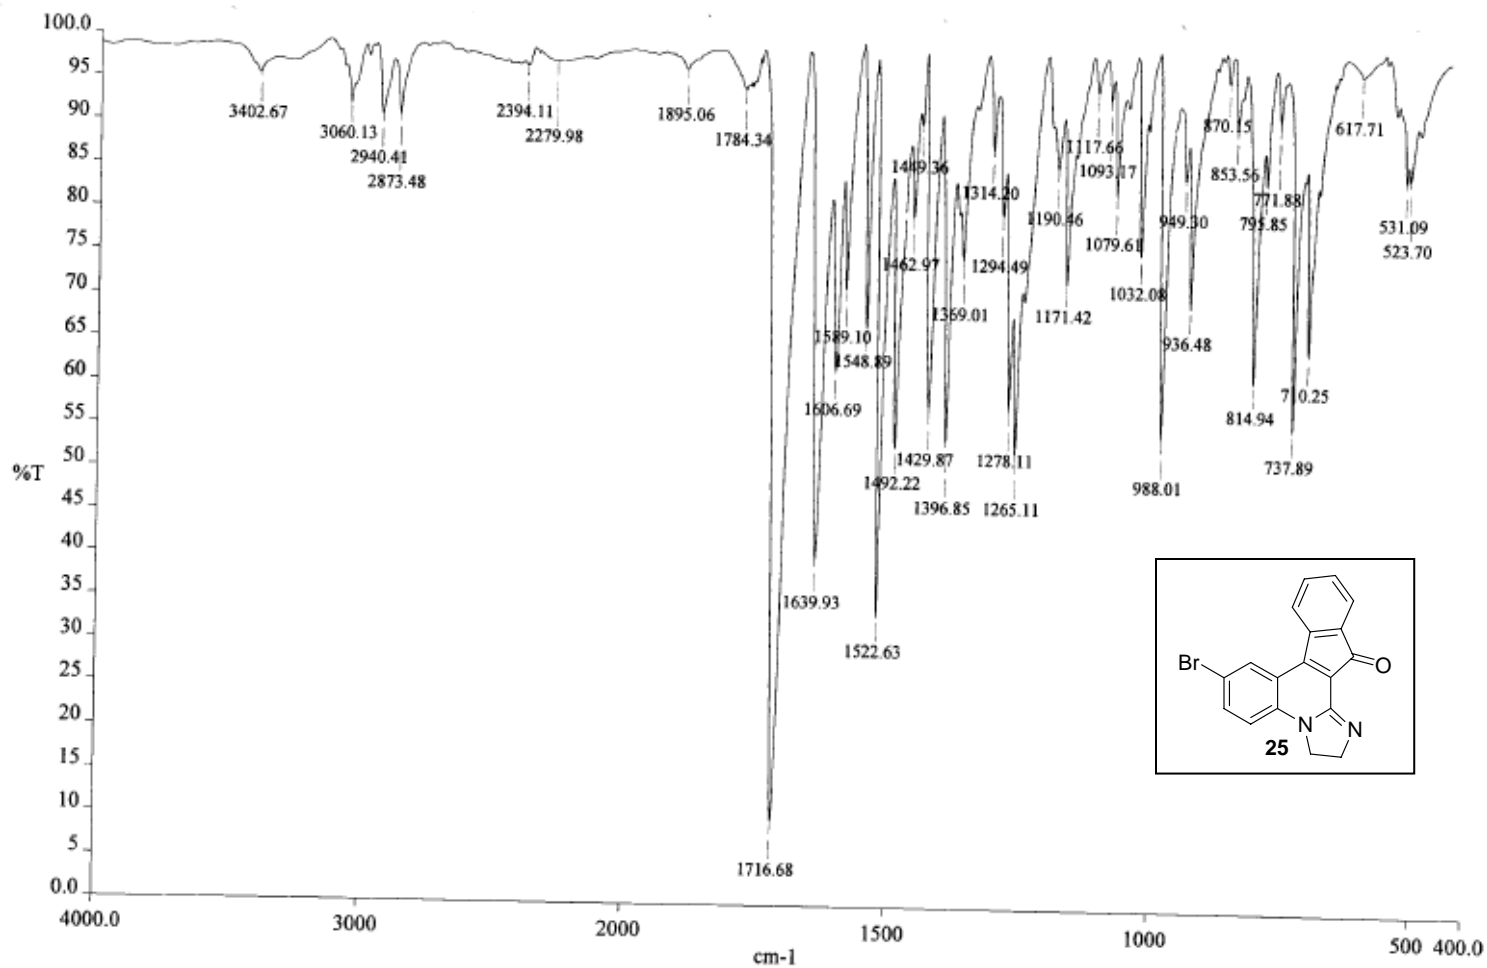

*Real*  
Jul 2009

Spectrum Name: CR080-67-183-183A1.sp  
Description: CR080-67-183-183A1 IN KBr

Analyst : GANESH Z

Accumulations: 16

Time: 4:30:59 PM

Resolution: 4.00 cm<sup>-1</sup>

Date: 7/8/2009

NAME CR080-80-66-53B  
 EXPNO 1  
 PROCNO 1  
 Date\_ 20091208  
 Time 16.43  
 INSTRUM spect  
 PROBHD 5 mm DUL 13C-1  
 PULPROG zg30  
 TD 32768  
 SOLVENT CDCl3  
 NS 4  
 DS 0  
 SWH 8278.146 Hz  
 FIDRES 0.262828 Hz  
 AQ 1.9782372 sec  
 RG 674.7  
 DW 66.400 usec  
 DE 8.00 usec  
 TE 292.5 K  
 D1 3.00000000 sec  
 TDO 1  
 ===== CHANNEL f1 =====  
 NUC1 13  
 P1 12.60 usec  
 PL1 -1.00 dB  
 FFO1 400.1324710 MHz  
 SI 18384  
 SF 400.1300128 MHz  
 WDW EM  
 SSB 0  
 LB 0.30 Hz  
 GB 0  
 PC 0.60

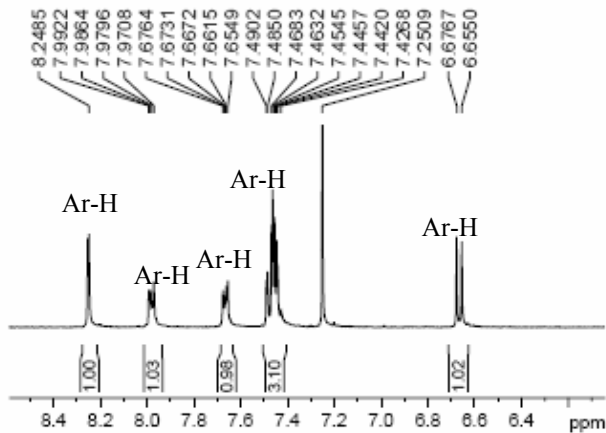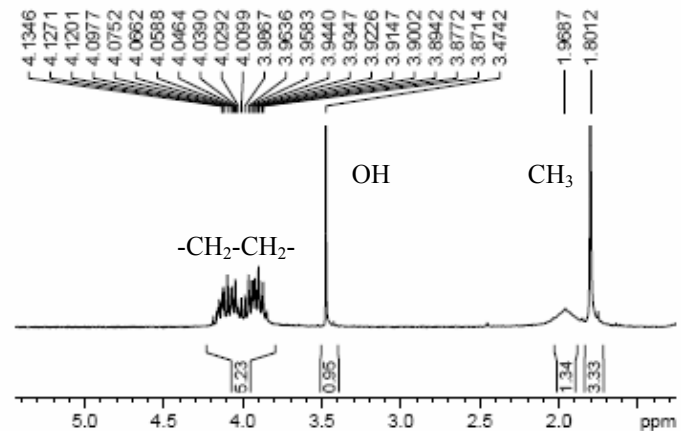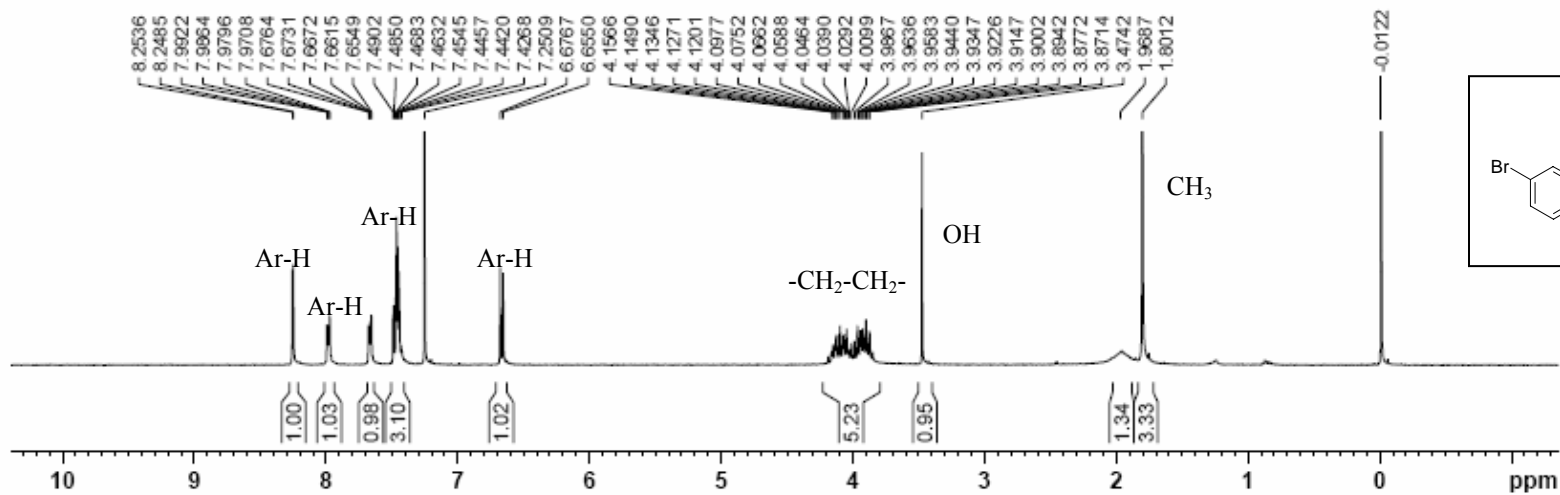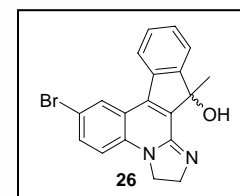



NAME CR080-90-66-53B  
 EXPNO 2  
 PROCNO 1  
 Date\_ 20091208  
 Time 19.45  
 INSTRUM spect  
 PROBHD 5 mm DUL 13C-1  
 PULPROG zg30  
 TD 32768  
 SOLVENT CDCl3  
 NS 4  
 DS 0  
 SWH 8278.148 Hz  
 FIDRES 0.252929 Hz  
 AQ 1.9792372 sec  
 RG 574.7  
 DW 80.400 usec  
 DE 8.00 usec  
 TE 293.6 K  
 D1 3.00000000 sec  
 TDO 1

===== CHANNEL f1 =====  
 NUC1 1H  
 P1 12.60 usec  
 PL1 -1.00 dB  
 SFO1 400.1324710 MHz  
 SI 18384  
 SF 400.1300129 MHz  
 WDW EM  
 SSB 0  
 LB 0.30 Hz  
 GB 0  
 PC 0.60

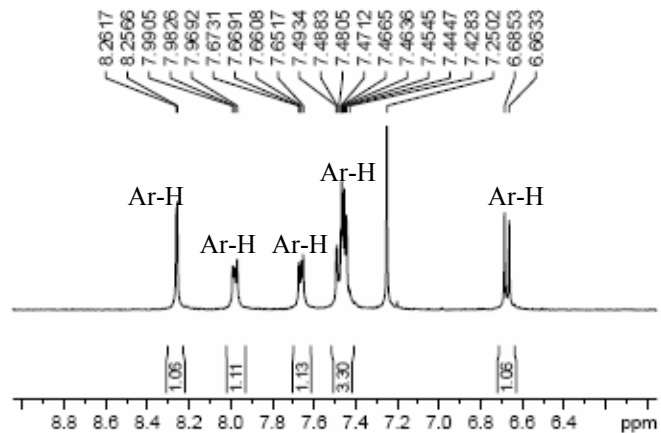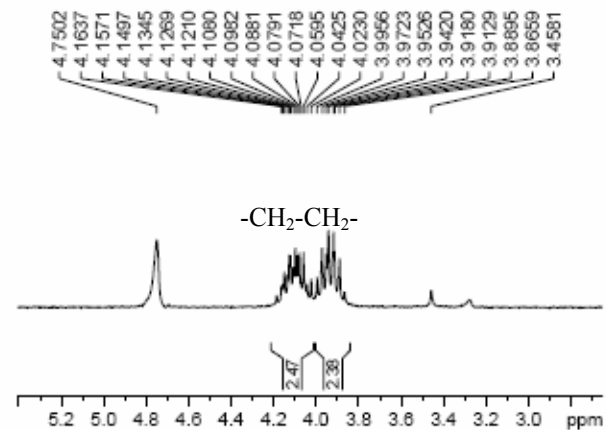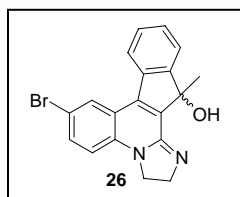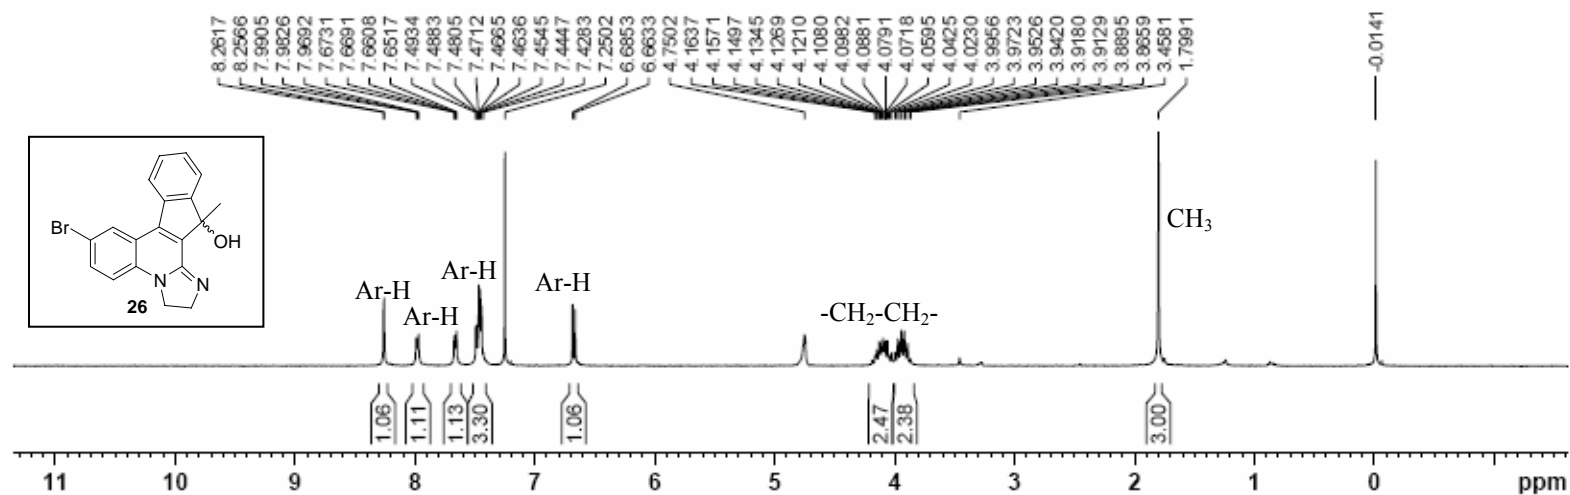

Current Data Parameters  
 NAME CR60-00-05-330  
 EXPNO 1  
 PROCNO 1

F2 - Acquisition Parameters  
 Date\_ 20100316  
 Time 20.30  
 INSTRUM spect  
 PROCNO 5 run BUL-13C-1  
 PULPROG zgpg30  
 TD 65536  
 SOLVENT CDCl3  
 NS 20476  
 DS 4  
 SWH 23050.814 Hz  
 FIDRES 0.365510 Hz  
 AQ 1.3954756 sec  
 RG 2298.0  
 CW 20.850 usec  
 CE 6.00 usec  
 TE 292.0 K  
 D1 2.0000000 sec  
 d11 0.0300000 sec  
 DELTA 1.8999999 sec  
 TDO 0

----- CHANNEL f1 -----  
 NUC1 13C  
 P1 7.00 usec  
 PL1 -2.00 dB  
 SFO1 100.628250 MHz

----- CHANNEL f2 -----  
 CPDPRG2 wauc16  
 NUC2 1H  
 PCPD2 100.00 usec  
 PL2 -1.00 dB  
 PL12 14.32 dB  
 PL13 10.32 dB  
 SFO2 400.120000 MHz

F2 - Processing parameters  
 SI 32768  
 SF 100.6127019 MHz  
 WDW EM  
 SSB 0  
 LB 0.00 Hz  
 GB 0  
 PC 0.20

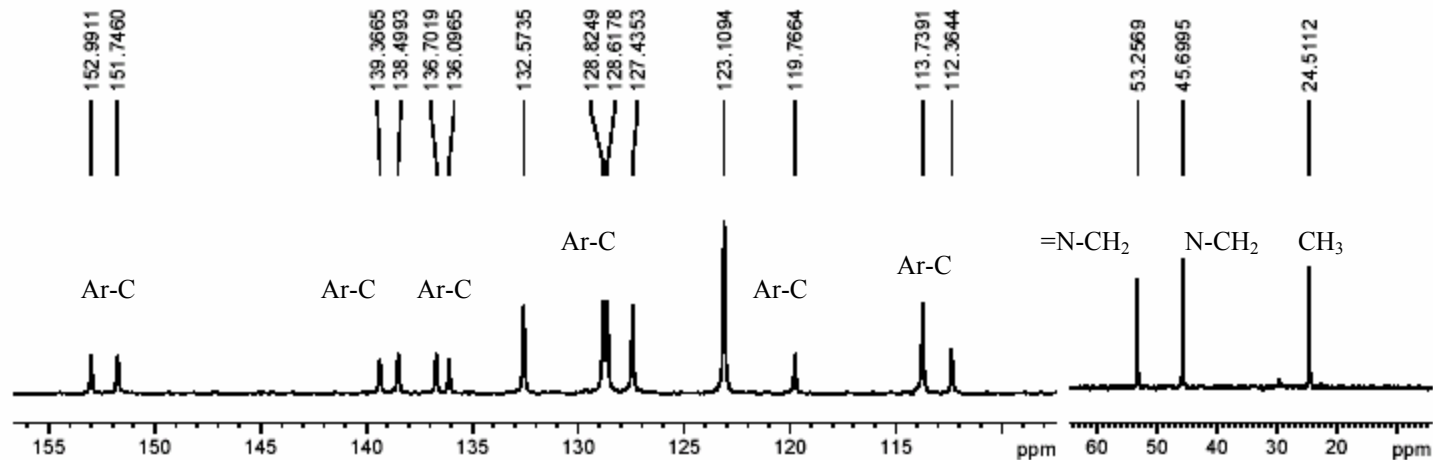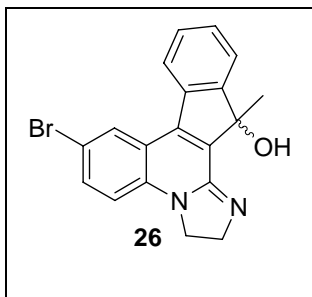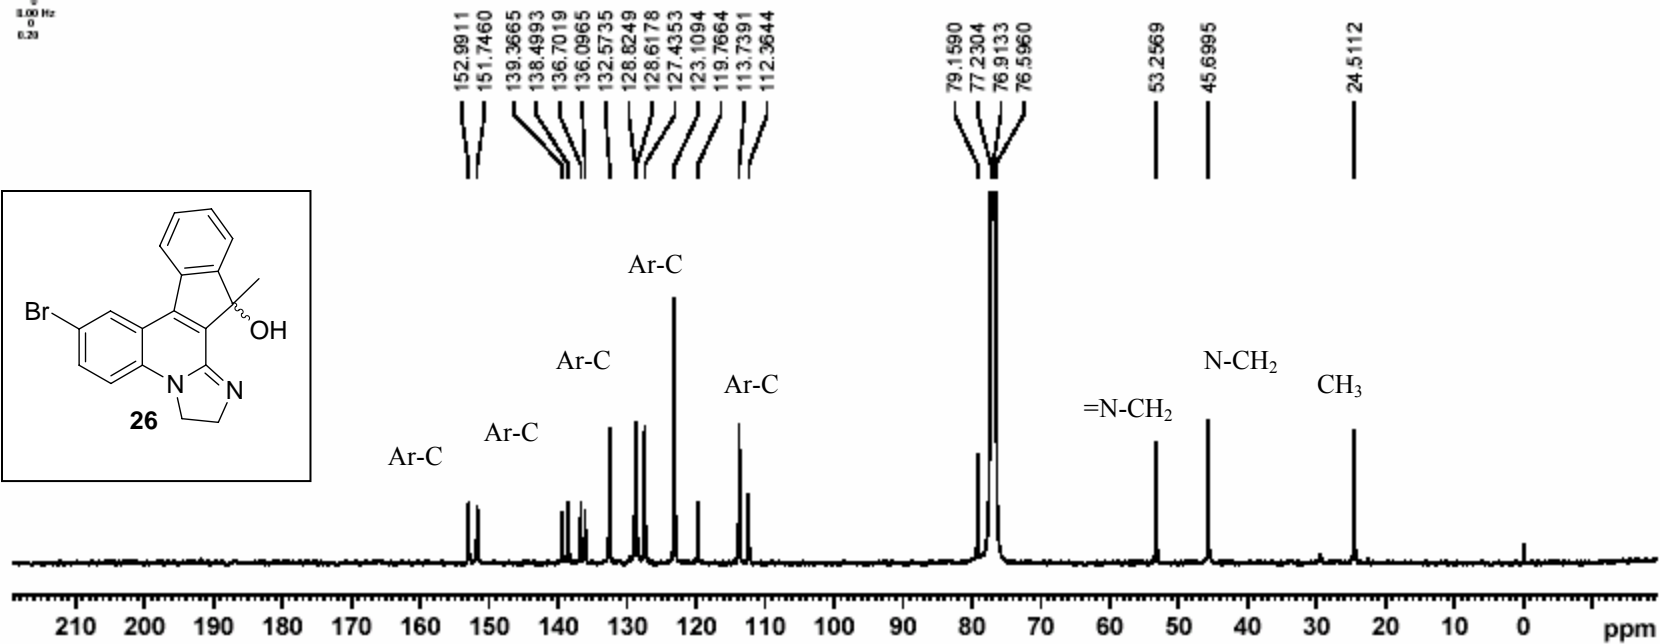

Current Data Parameters  
NAME: CP39046-020  
EXPNO: 2  
PROCNO: 1

F2 - Acquisition Parameters  
Date\_: 20160317  
Time: 7.02  
INSTRUM: spect  
PROBHD: 5 mm DUL-13C-1  
PULPROG: zgpg30  
TD: 65536  
SOLVENT: CDCl3  
NS: 16076  
DS: 4  
SWH: 22280.854 Hz  
FIDRES: 0.365949 Hz  
AQ: 1.3064750 sec  
RG: 226.0  
DQV: 20.050 usec  
DE: 0.06 usec  
TE: 300.2 K  
CMT2: 145.000000  
D1: 2.0000000 sec  
d5: 0.0034820 sec  
d12: 0.0000000 sec  
DELTA: 0.0000000 sec  
TD0: 1

===== CHANNEL f1 =====  
NUC1: 13C  
P1: 7.00 usec  
PL1: -1.00 dB  
SFO1: 101.622290 MHz

===== CHANNEL f2 =====  
CPCPRG2: waltz16  
NUC2: 1H  
P2: 12.50 usec  
PL2: -1.00 dB  
SFO2: 400.141995 MHz

F2 - Processing parameters  
SI: 32768  
SF: 101.612789 MHz  
WDW: EM  
SSB: 0  
LB: 0.00 Hz  
GB: 0  
PC: 0.20

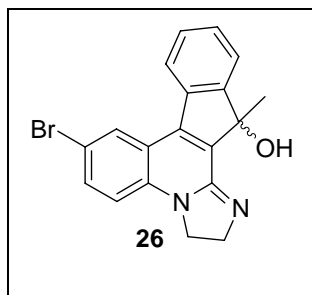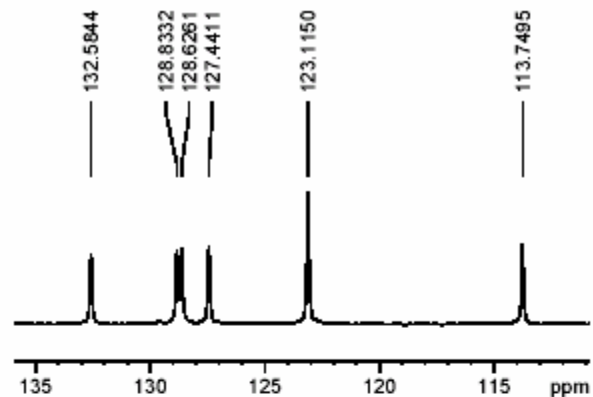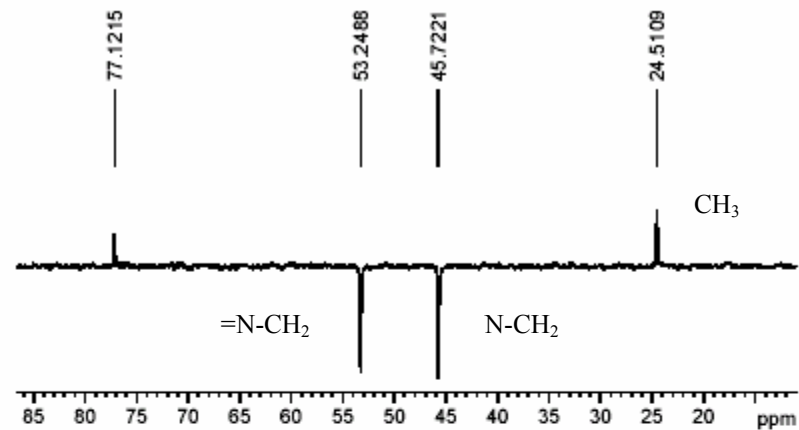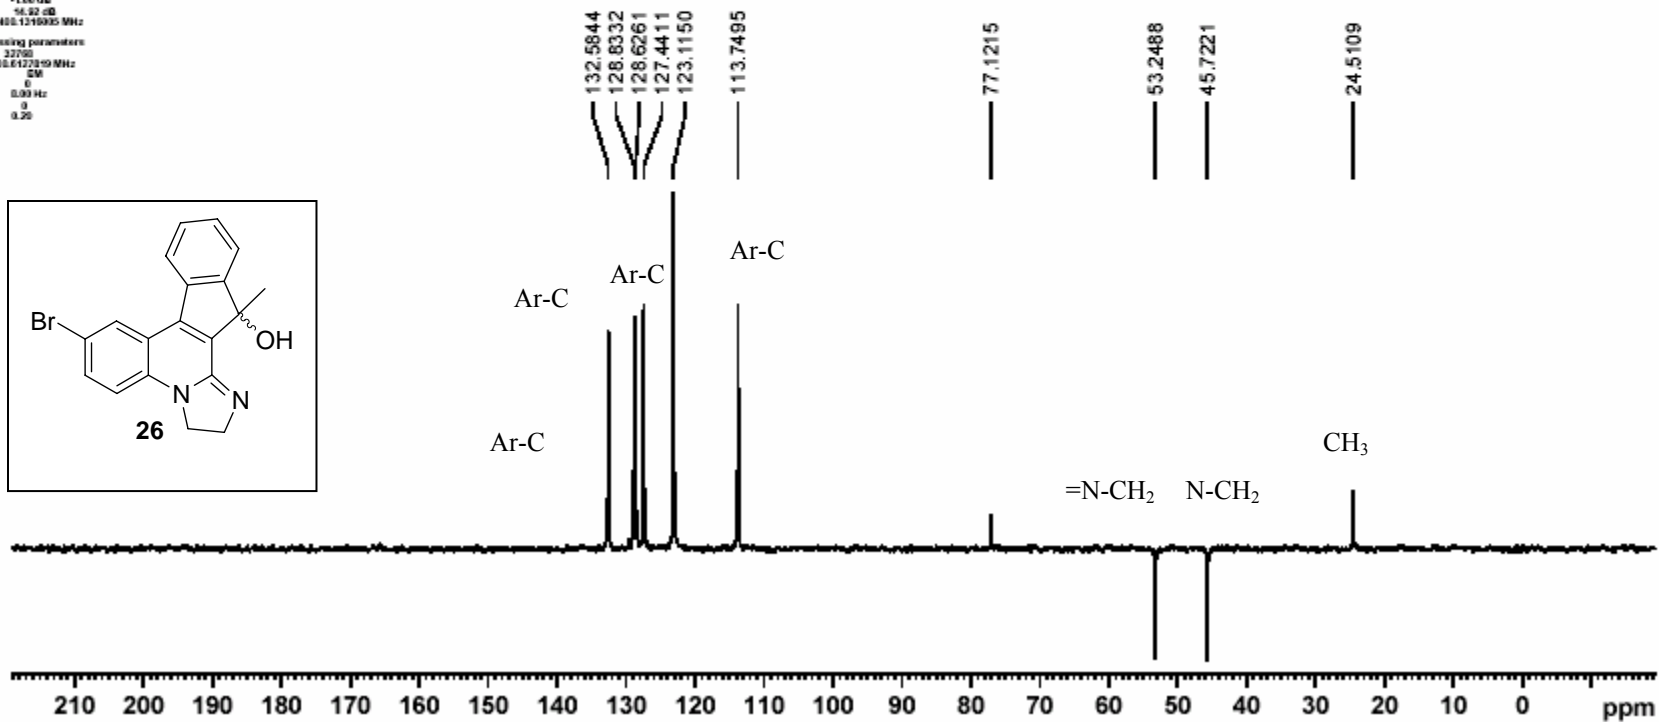

\*

Sample Name: CR080-90-65-53B

INDIA  
Acq. Time: 16:38

Acq. Date: Tuesday, December 08, 2009

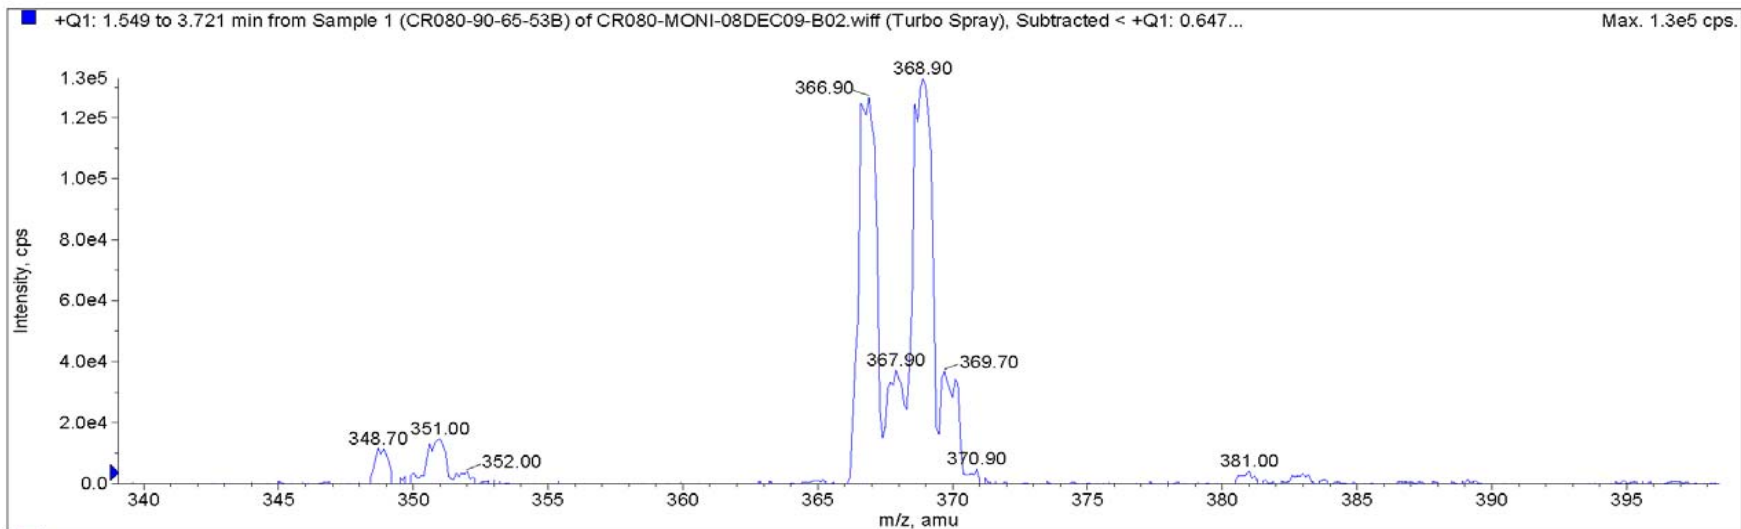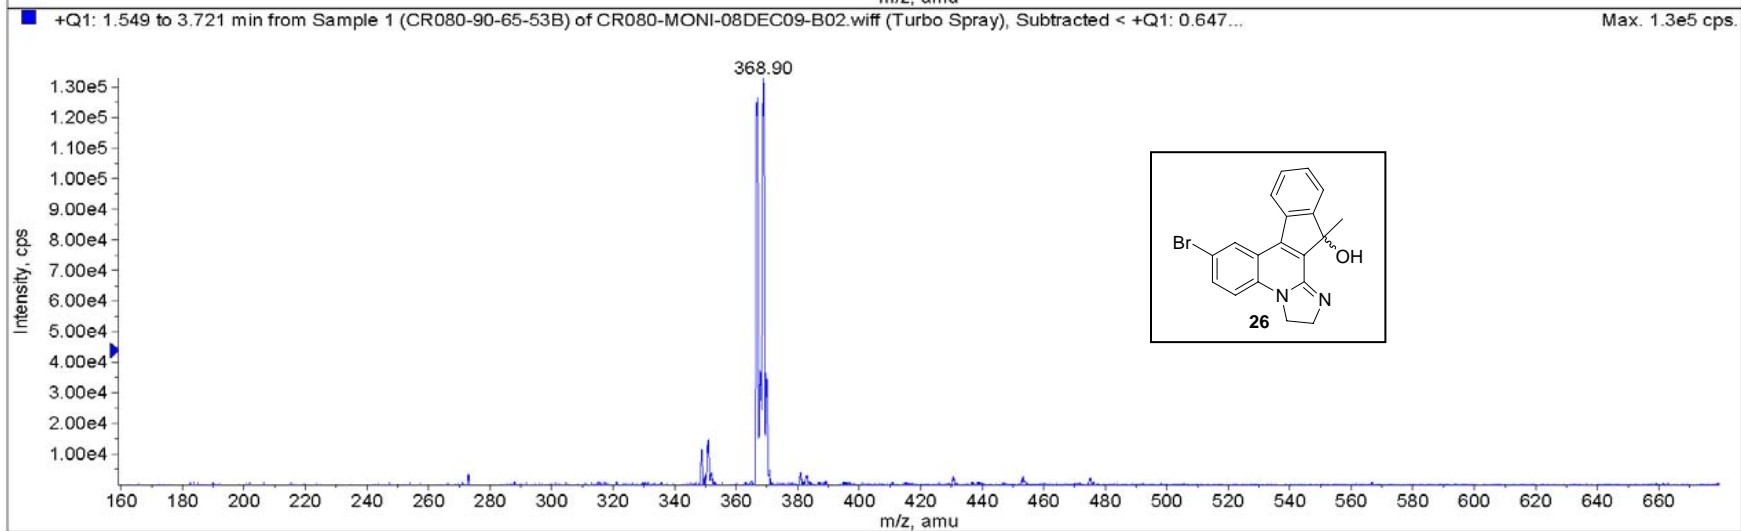

\*Sample Comment: [M+H] 367

Expected

\*\*Analyzed By :

\*\*Checked By :

Sample Name: CR080-90-65-53B Acq. Time: 16:38 Acq. Date: Tuesday, December 08, 2009

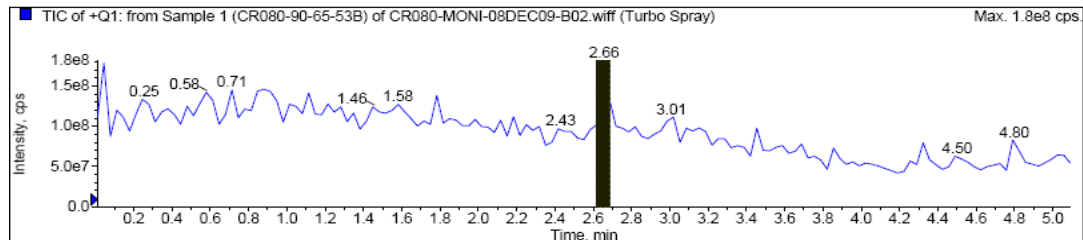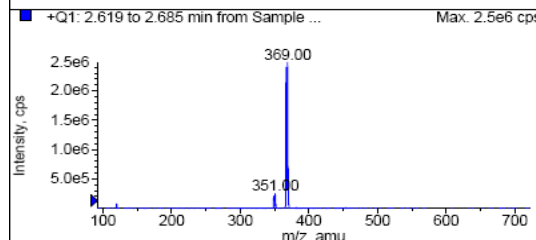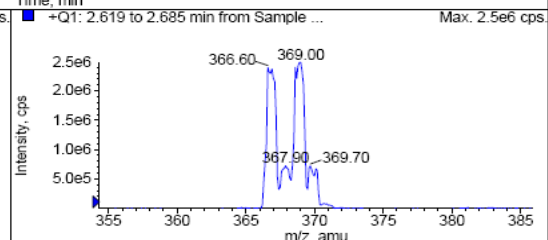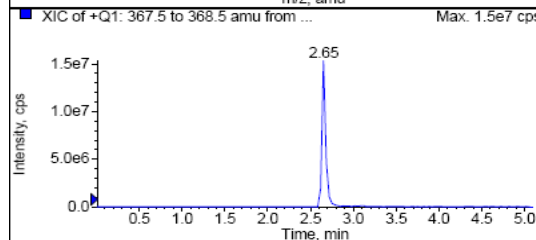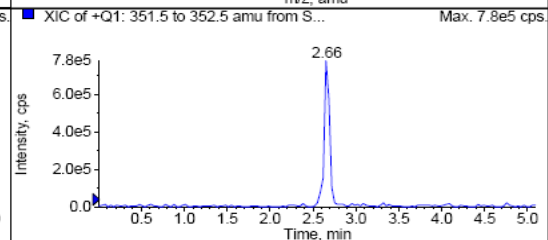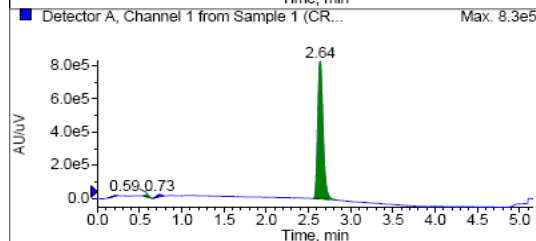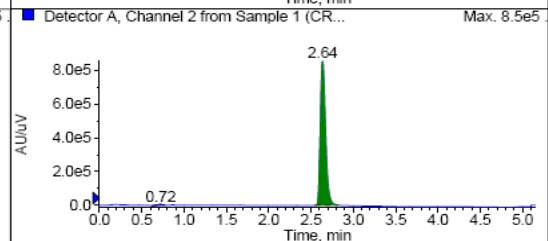

Peak List for "Detector A, Channel 1 from Sample 1 (CR080-90-65-53B)"

| Time (min) | Area (counts) | % Area   | Height  |          |
|------------|---------------|----------|---------|----------|
| 2          | 0.5873        | 4.1746e4 | 1.1596  | 1.4379e4 |
| 3          | 0.7333        | 5.3065e4 | 1.4740  | 1.3802e4 |
| 4          | 2.6378        | 3.4912e6 | 96.9735 | 8.2786e5 |

Peak List for "Detector A, Channel 2 from Sample 1 (CR080-90-65-53B)"

| Time (min) | Area (counts) | % Area   | Height  |           |
|------------|---------------|----------|---------|-----------|
| 1          | 0.7224        | 2.7191e4 | 0.7458  | 5739.3274 |
| 2          | 2.6367        | 3.6186e6 | 99.2542 | 8.5385e5  |

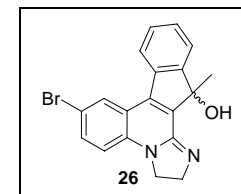

LCMS-1 REACN MONIT (TFA Buffer)  
Channel 1 at wavelength 220nm, Channel 2 at wavelength 260 nm

Analysed By :

Sample Name : CR080-90-65-53B  
 Sample ID : CR080-90-65-53B  
 Column : Xterra RP-18 (250 x 4.6 mm) 5u  
 Vial # : 22  
 Inj. Volume : 2 uL  
 Tray # : 2  
 Acquired by : AVINASH

Data File Name : 17-02-10\_CR080-90-65-53B\_01.lcd  
 Method File Name : GENERAL\_B11.lcm  
 Batch File Name : 170210.lcb  
 Data Acquired : 2/18/2010 3:32:59 AM  
 Data Processed : 2/18/2010 4:03:02 AM  
 Ref.No.: DI/A0257/97

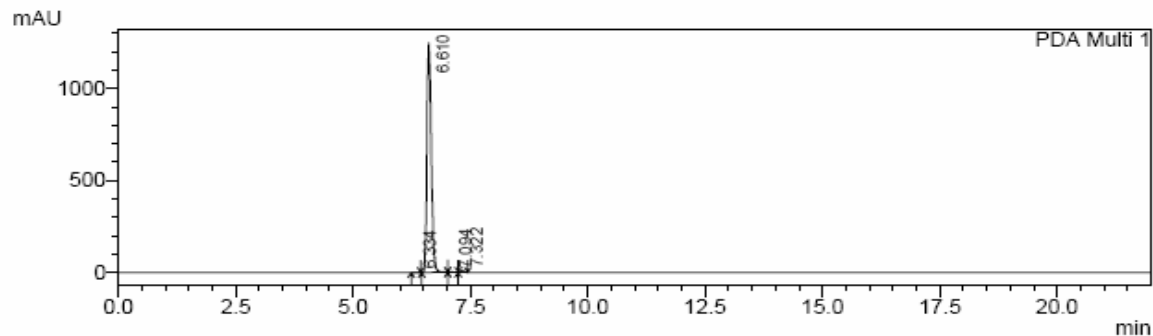

1 PDA Multi 1/252nm 4nm

PeakTable

| Peak# | Ret. Time | Area    | Area % | Height  |
|-------|-----------|---------|--------|---------|
| 1     | 6.33      | 3095    | 0.04   | 563     |
| 2     | 6.61      | 7980395 | 99.14  | 1247755 |
| 3     | 7.09      | 14101   | 0.18   | 1716    |
| 4     | 7.32      | 52185   | 0.65   | 9224    |
| Total |           | 8049776 | 100.00 | 1259258 |

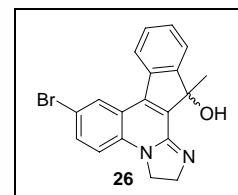

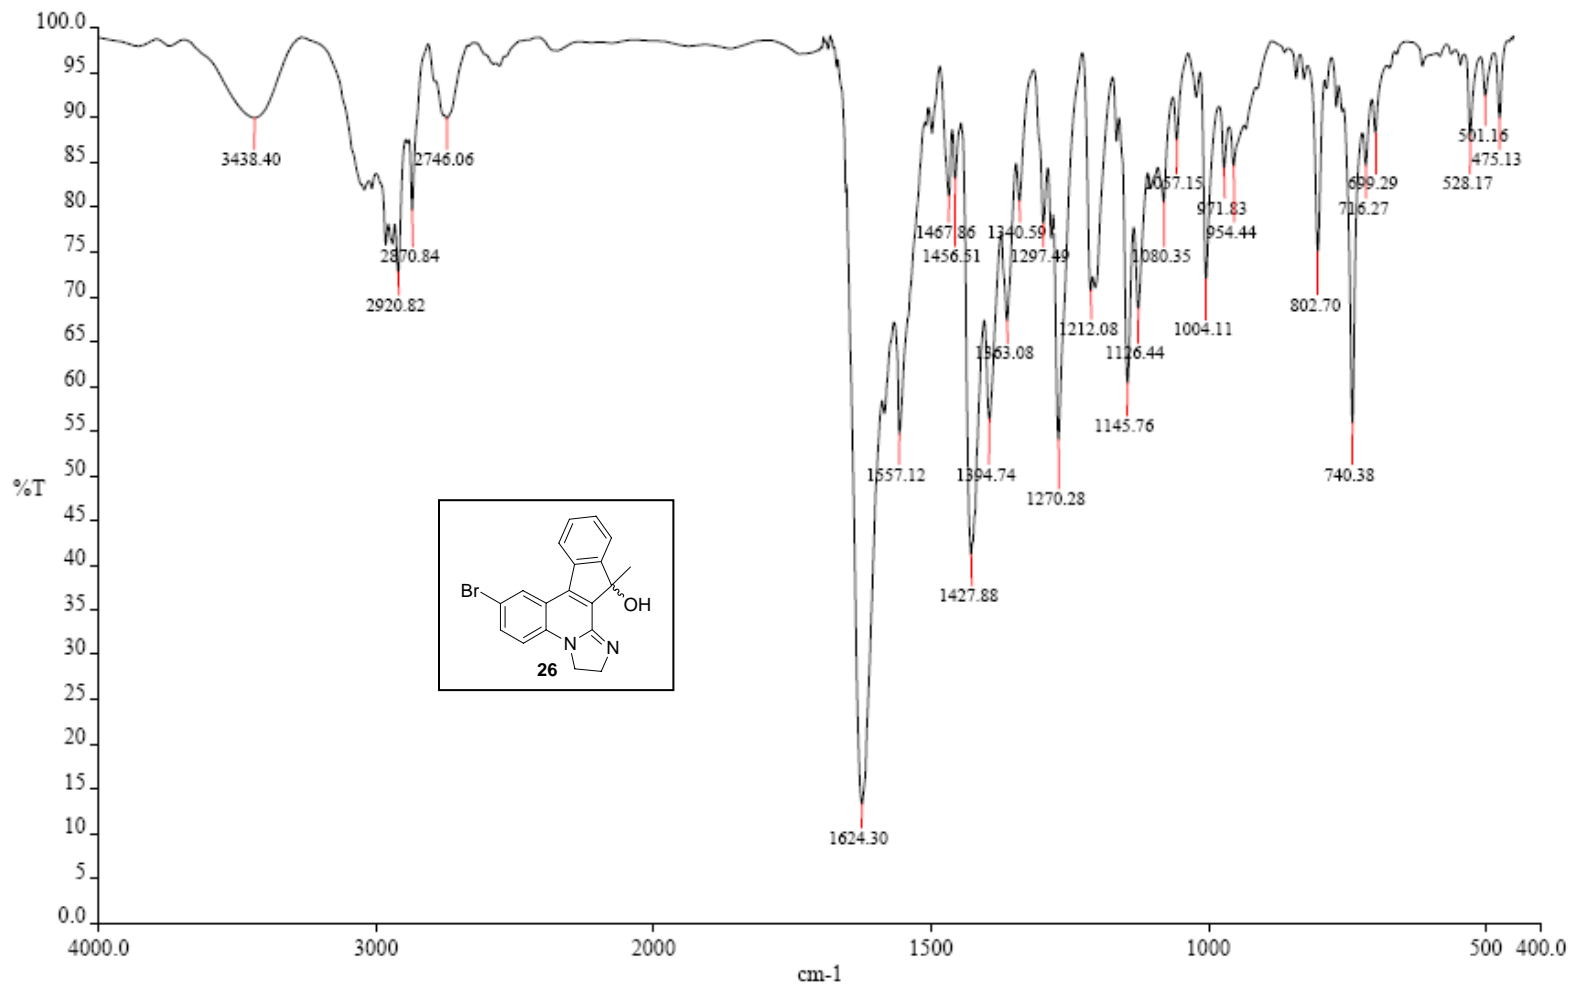

Spectrum Name: CR080-90-65-53B.sp

Analyst: GANESH

Accumulations: 16

Time: 11:15:50 AM

Description: CR080-90-65-53B IN KBr

Resolution: 4.00 cm-1

Date: 2/5/2010

27

NAME CR080-90-69-69A  
EXPNO 1  
PROCNO 1  
Date\_ 20091202  
Time 10.17  
INSTRUM spect  
PROBHD 5 mm DUL 13C-1  
PULPROG zg30  
TD 32768  
SOLVENT CDCl3  
NS 4  
DS 0  
SWH 8276.146 Hz  
FIDRES 0.252829 Hz  
AQ 1.9792372 sec  
RG 812.7  
DW 60.400 usec  
DE 6.00 usec  
TE 292.3 K  
D1 3.00000000 sec  
TD0 1  
----- CHANNEL f1 -----  
NUC1 1H  
P1 12.50 usec  
PL1 -1.00 dB  
SFO1 400.1324710 MHz  
SI 16384  
SF 400.1300130 MHz  
WDW EM  
SSB 0  
LB 0.30 Hz  
GB 0  
PC 0.60

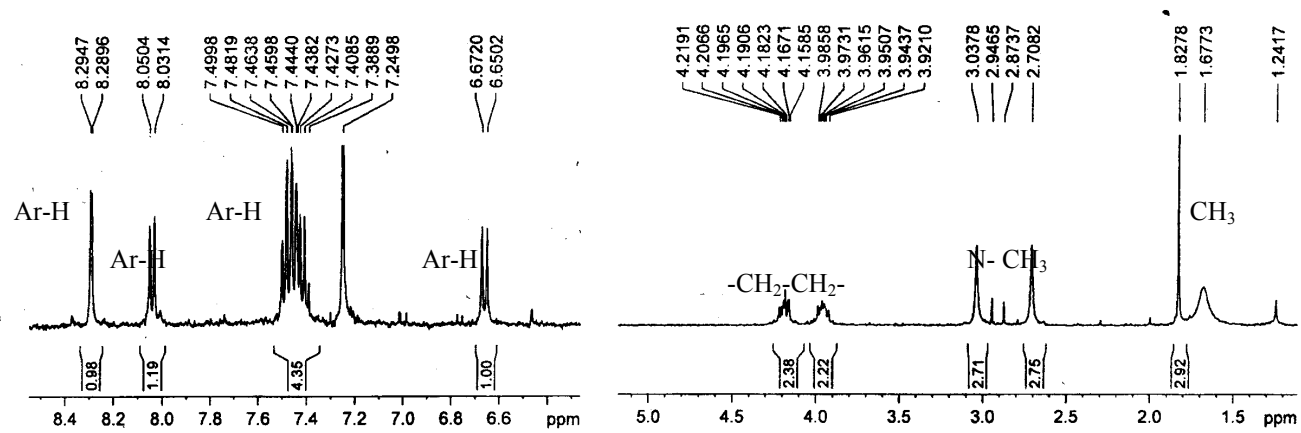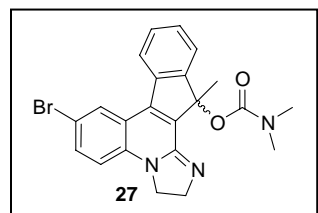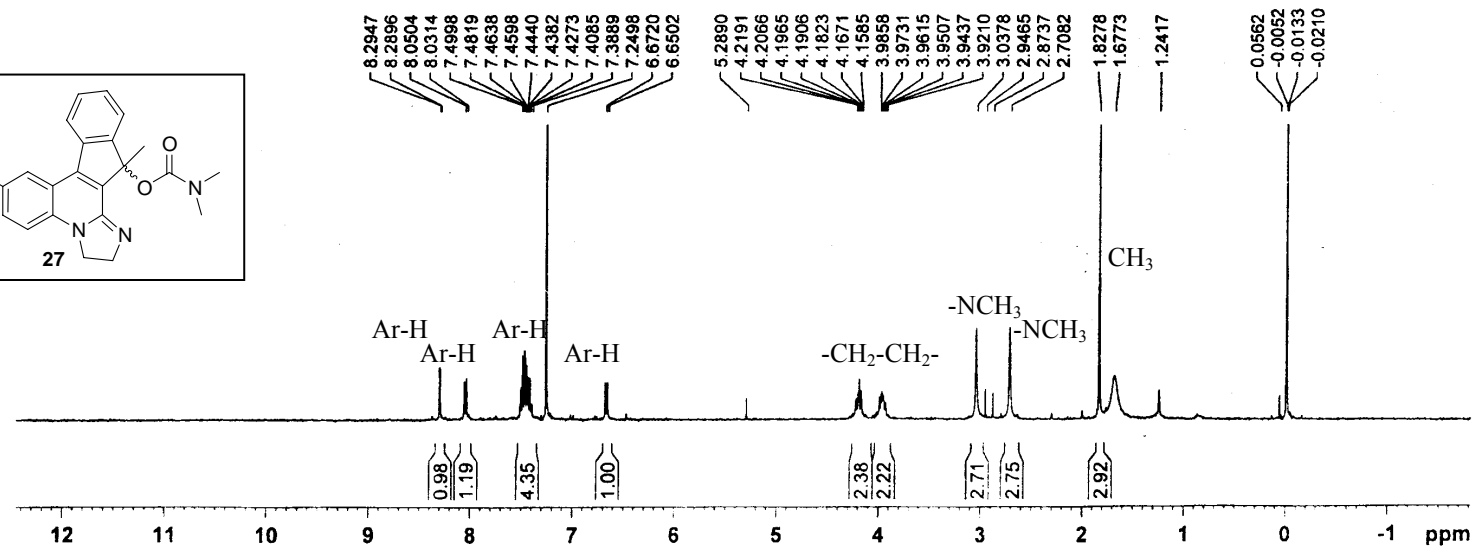



Current Data Parameters  
 NAME CR080-90-69-69A  
 EXPNO 1  
 PROCNO 1

F2 - Acquisition Parameters  
 Date 20100206  
 Time 13.40  
 INSTRUM spect  
 PROBHD 5 mm DUL 13C-1  
 PULPROG zgpg30  
 TD 6536  
 SOLVENT CDCl3  
 NS 600  
 DS 4  
 SWH 23980.814 Hz  
 FIDRES 0.365918 Hz  
 AQ 1.3664756 sec  
 RG 2580.3  
 DW 20.850 usec  
 DE 6.00 usec  
 TE 293.1 K  
 D1 2.0000000 sec  
 d11 0.0300000 sec  
 DELTA 1.8999998 sec  
 TDO 1

===== CHANNEL f1 =====  
 NUC1 13C  
 P1 7.80 usec  
 PL1 -2.00 dB  
 SFO1 100.6228298 MHz

===== CHANNEL f2 =====  
 CPDPRG2 waltz16  
 NUC2 1H  
 PCPD2 100.00 usec  
 PL2 -1.00 dB  
 PL12 14.82 dB  
 PL13 18.82 dB  
 SFO2 400.1316005 MHz

F2 - Processing parameters  
 SI 32788  
 SF 100.6127738 MHz  
 WDW EM  
 SSB 0  
 LB 8.00 Hz  
 GB 0  
 PC 0.20

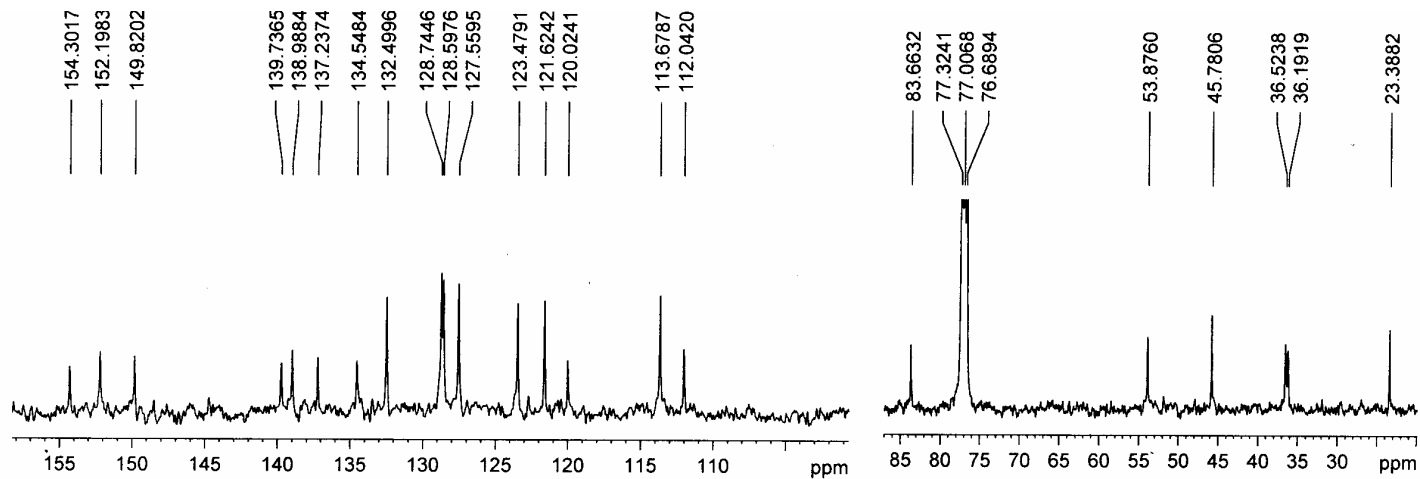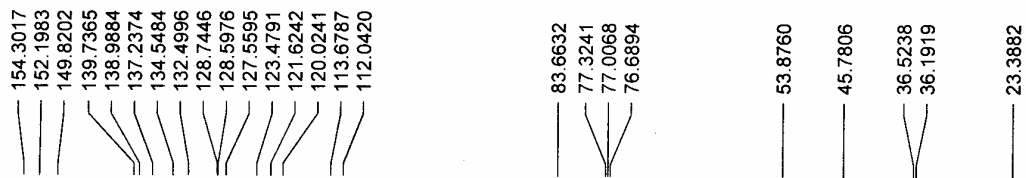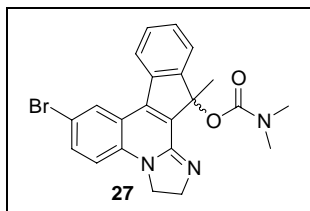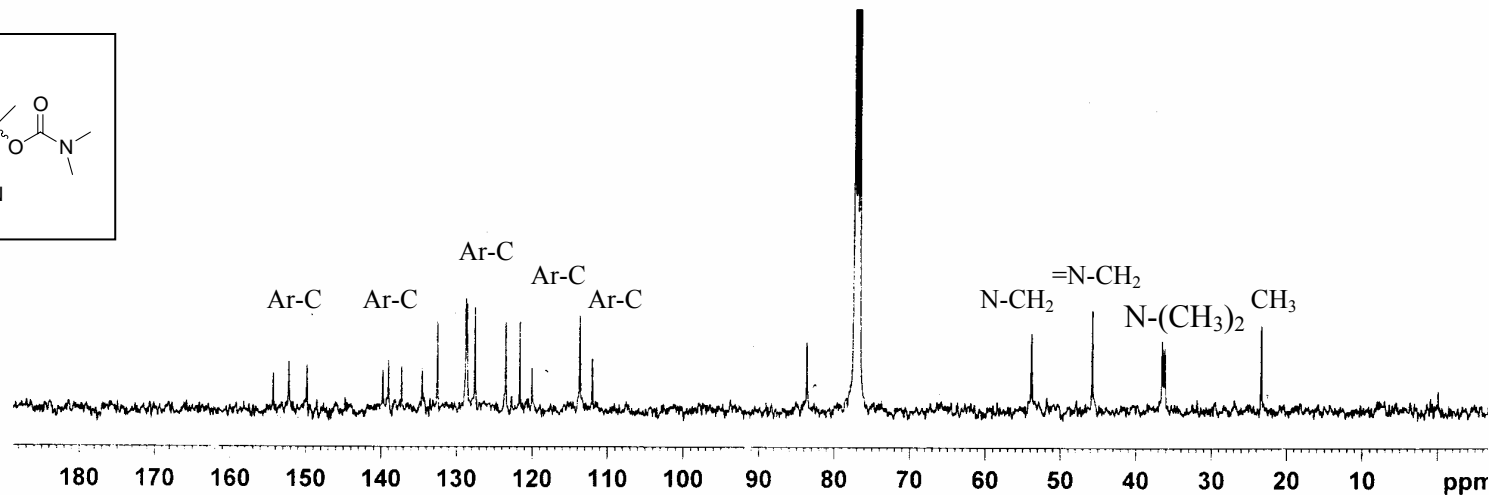

(20)

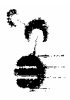

NAME CR080-90-69-69A  
EXPNO 2  
PROCNO 1  
Date\_ 20100217  
Time 7.01  
INSTRUM spect  
PROBHD 5 mm DUL 13C-1  
PULPROG dept135  
TD 65536  
SOLVENT CDCl3  
NS 2803  
DS 4  
SWH 23980.814 Hz  
FIDRES 0.365918 Hz  
AQ 1.3664756 sec  
RG 3251  
DW 20.850 usec  
DE 6.00 usec  
TE 291.7 K  
CNST2 145.0000000  
D1 2.00000000 sec  
d2 0.00344828 sec  
d12 0.00002000 sec  
DELTA 0.00000993 sec  
TD0 1

==== CHANNEL f1 =====  
NUC1 13C  
P1 7.80 usec  
P2 15.60 usec  
PL1 -2.00 dB  
SFO1 100.6228298 MHz  
  
==== CHANNEL f2 =====  
CPDPRG2 waltz16  
NUC2 1H  
P3 12.50 usec  
P4 25.00 usec  
PCPD2 100.00 usec  
PL2 -1.00 dB  
PL12 14.92 dB  
SFO2 400.1316005 MHz  
SI 32768  
SF 100.6127795 MHz  
WDW EM  
SSB 0  
LB 8.00 Hz  
GB 0  
PC 0.20

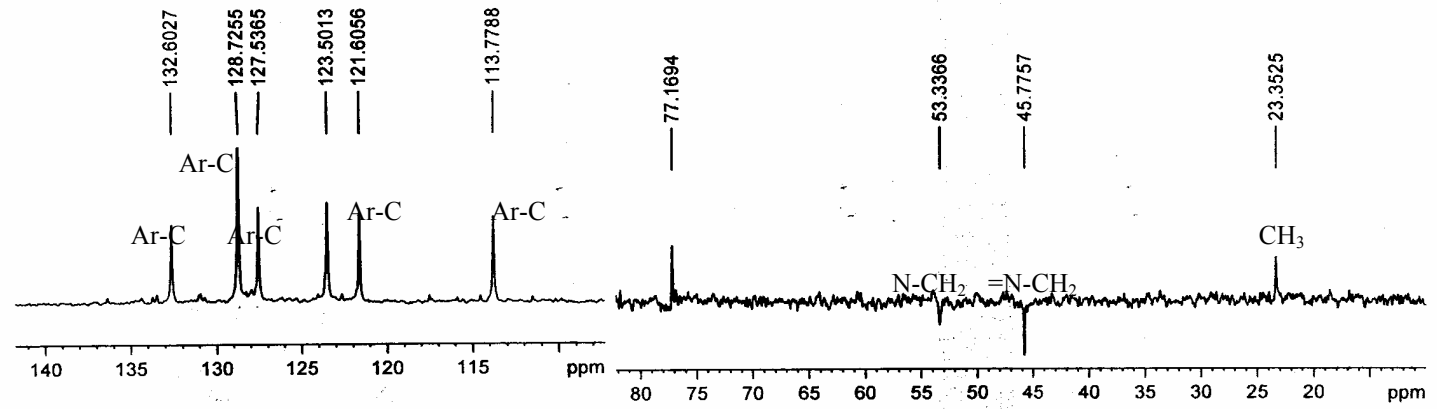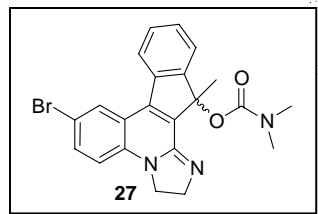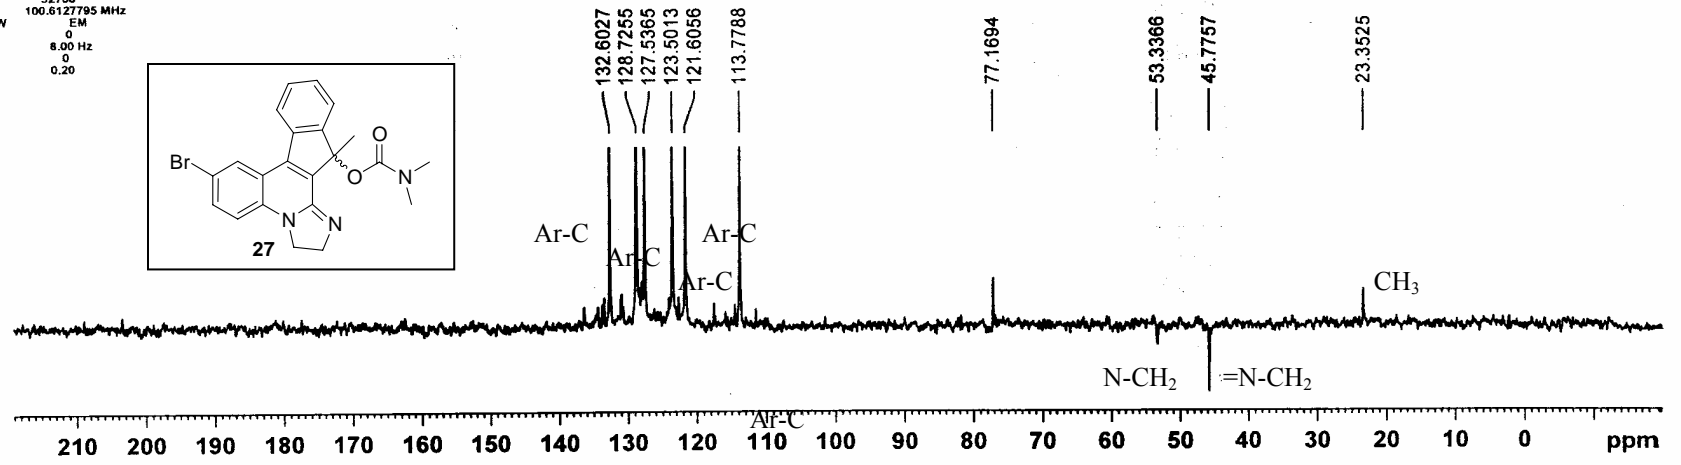

Analysed by: Yogita

\*

Sample Name: CR080-90-69-69A

Acq. Time: 10:29

Acq. Date: Wednesday, December 02, 2009

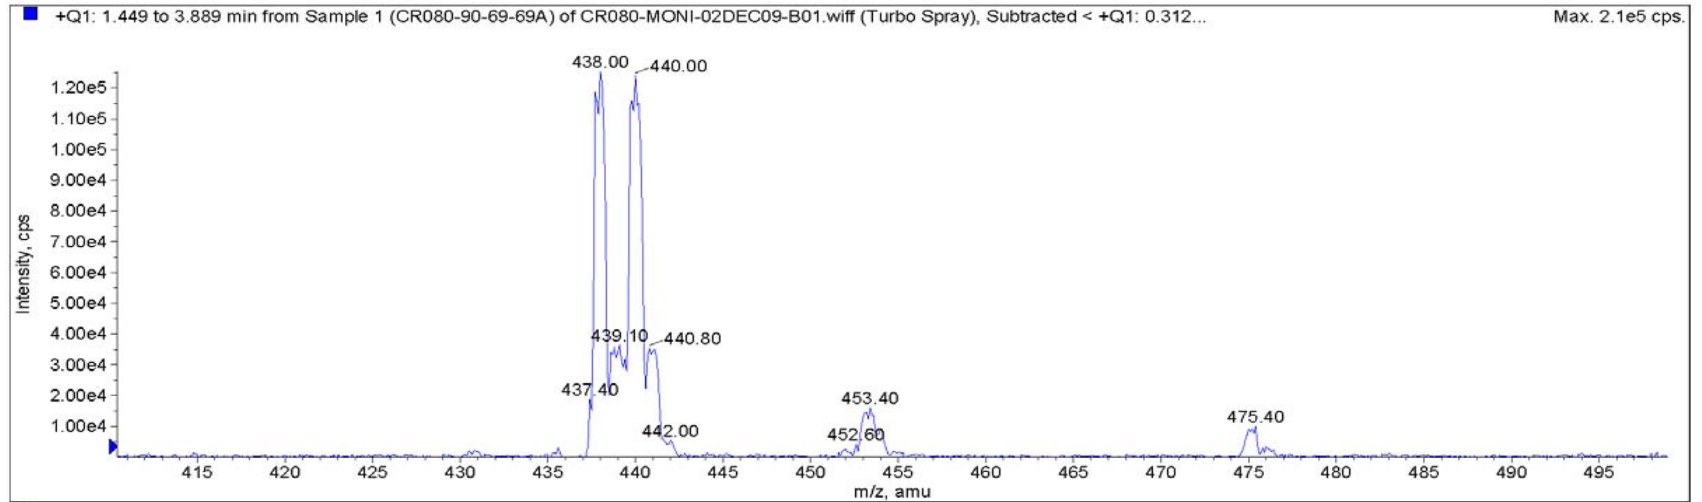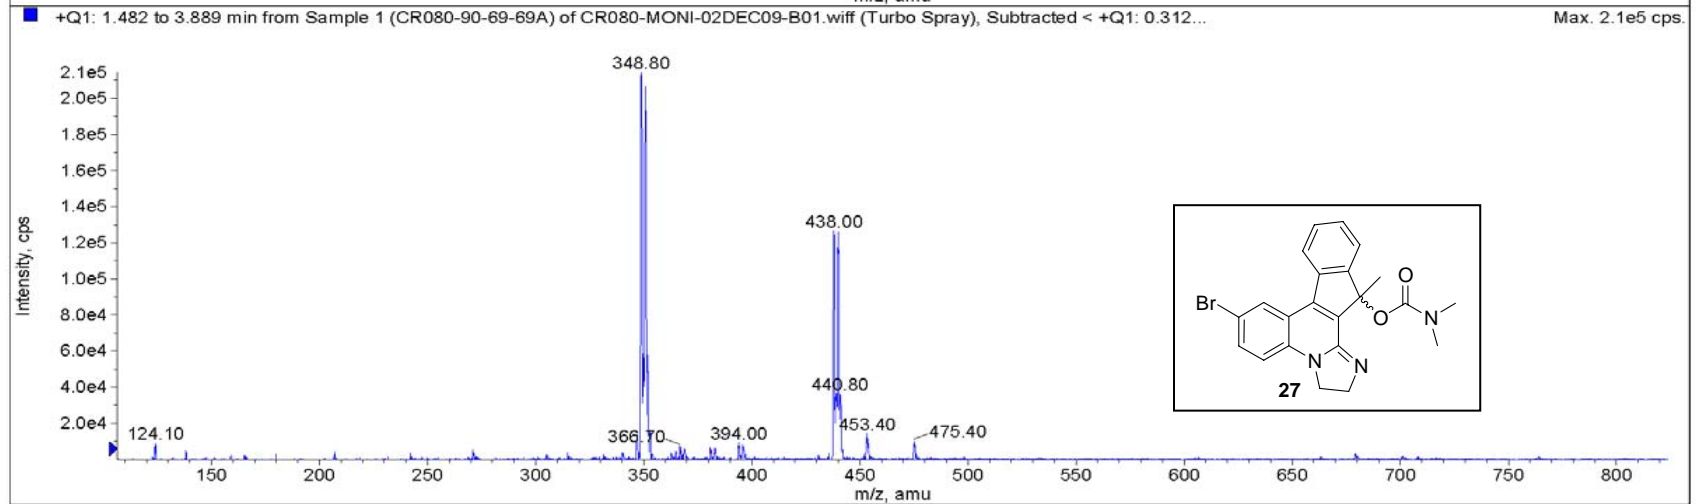

\*Sample Comment: [M+H] 438

Expected

\*\*Analyzed By :

\*\*Checked By :

Sample Name: CR080-90-69-69A Acq. Time: 10:29 Acq. Date: Wednesday, December 02, 2009

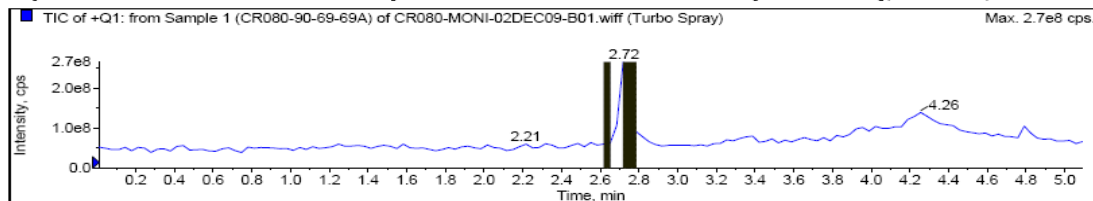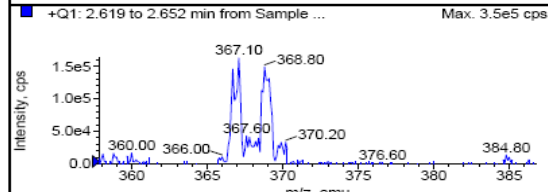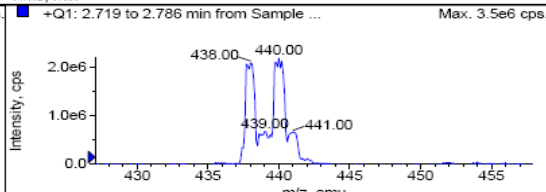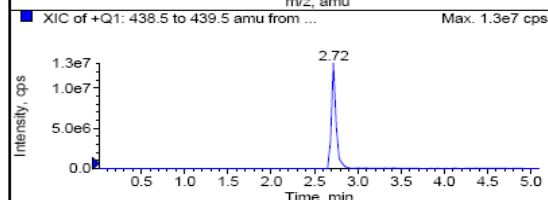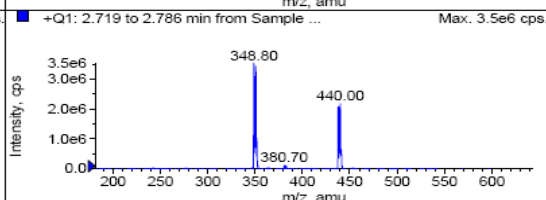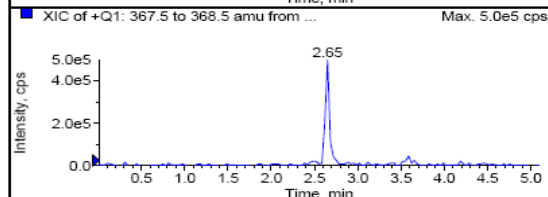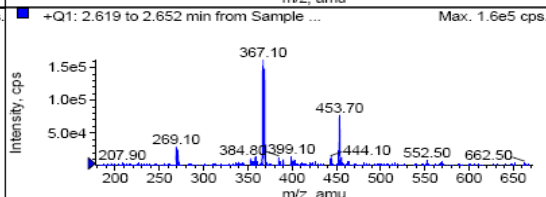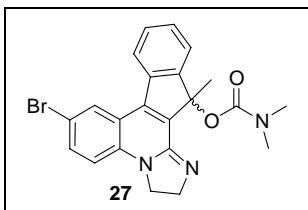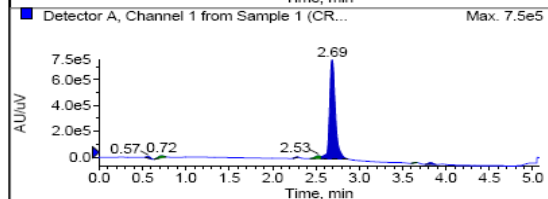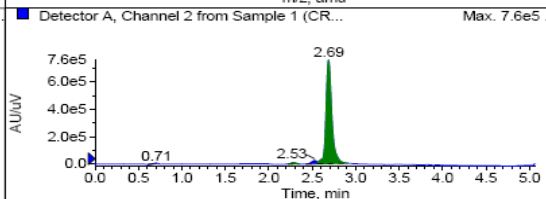

Peak List for "Detector A, Channel 1 from Sample 1 (CR080-90-69-69A)"

|   | Time (min) | Area (counts) | % Area  | Height    |
|---|------------|---------------|---------|-----------|
| 1 | 0.5651     | 2.9263e4      | 0.8025  | 1.0150e4  |
| 2 | 0.7194     | 6.5053e4      | 1.7840  | 1.5700e4  |
| 3 | 2.2831     | 6348.2182     | 0.1741  | 2705.2257 |
| 4 | 2.5262     | 1.0511e5      | 2.8826  | 2.2843e4  |
| 5 | 2.6869     | 3.3844e6      | 92.8139 | 7.6305e5  |
| 6 | 3.6549     | 5621.9603     | 0.1542  | 2036.7344 |

Peak List for "Detector A, Channel 2 from Sample 1 (CR080-90-69-69A)"

|   | Time (min) | Area (counts) | % Area  | Height    |
|---|------------|---------------|---------|-----------|
| 1 | 0.7060     | 6496.5548     | 0.1793  | 1594.4783 |
| 2 | 2.2852     | 4.0229e4      | 1.1102  | 1.0801e4  |
| 3 | 2.5275     | 1.0285e5      | 2.8384  | 2.3857e4  |
| 4 | 2.6886     | 3.4740e6      | 95.8721 | 7.5658e5  |

LCMS-1 REACH MONT (TFA Buffer) PEAK MERGED  
Channel 1 at wavelength 220nm, Channel 2 at wavelength 260 nm

Analysed By :

Sample Name : CR080-90-69-69A  
 Sample ID : CR080-90-69-69A  
 Column : Xterra RP-18 (150 x 4.6 mm) 5u  
 Vial # : 53  
 Inj. Volume : 1 uL  
 Tray # : 1  
 Acquired by : VISHAL

Data File Name : 07-01-2010\_CR080-90-69-69A\_07.lcd  
 Method File Name : GENERAL\_B1.lcm  
 Batch File Name : 07-01-2010.lcb  
 Data Acquired : 1/7/2010 2:46:10 PM  
 Data Processed : 1/7/2010 3:10:08 PM  
 Ref.No.: DI/A0257/84

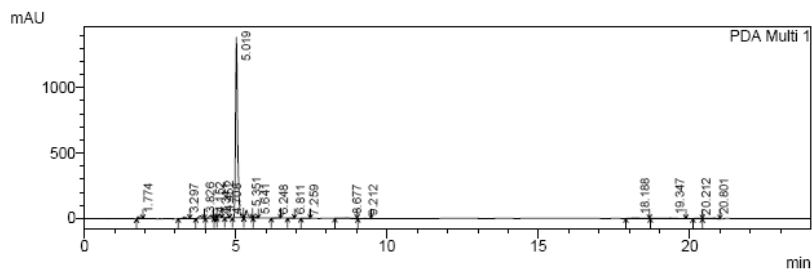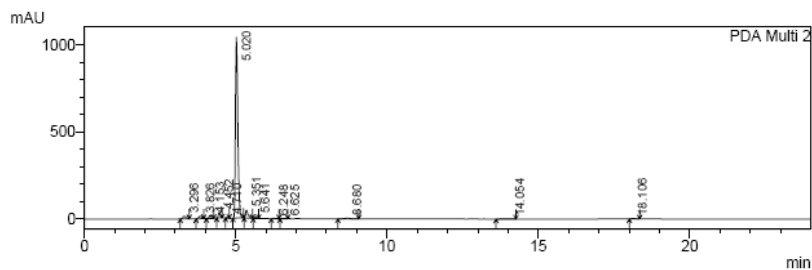

1 PDA Multi 1/200nm 4nm  
 2 PDA Multi 2/252nm 4nm

PeakTable

| Peak# | Ret. Time | Area    | Area % | Height  |
|-------|-----------|---------|--------|---------|
| 1     | 1.77      | 75640   | 0.94   | 15376   |
| 2     | 3.30      | 90352   | 1.13   | 13629   |
| 3     | 3.83      | 124462  | 1.55   | 18675   |
| 4     | 4.15      | 104525  | 1.31   | 18912   |
| 5     | 4.34      | 15819   | 0.20   | 3788    |
| 6     | 4.45      | 117919  | 1.47   | 26412   |
| 7     | 4.71      | 25822   | 0.32   | 5779    |
| 8     | 5.02      | 6594694 | 82.37  | 1377696 |
| 9     | 5.35      | 310478  | 3.88   | 56713   |
| 10    | 5.64      | 33575   | 0.42   | 7536    |
| 11    | 6.25      | 12408   | 0.15   | 1385    |
| 12    | 6.81      | 16178   | 0.20   | 3206    |
| 13    | 7.26      | 11390   | 0.14   | 1308    |
| 14    | 8.68      | 52312   | 0.65   | 3580    |
| 15    | 9.21      | 10800   | 0.13   | 836     |

| Peak# | Ret. Time | Area    | Area % | Height  |
|-------|-----------|---------|--------|---------|
| 16    | 18.19     | 126536  | 1.58   | 5193    |
| 17    | 19.35     | 157137  | 1.96   | 4077    |
| 18    | 20.21     | 35339   | 0.44   | 3458    |
| 19    | 20.80     | 90998   | 1.14   | 4991    |
| Total |           | 8006384 | 100.00 | 1572550 |

PeakTable

| Peak# | Ret. Time | Area    | Area % | Height  |
|-------|-----------|---------|--------|---------|
| 1     | 3.30      | 103804  | 1.60   | 15388   |
| 2     | 3.83      | 96307   | 1.48   | 14946   |
| 3     | 4.15      | 91270   | 1.41   | 17503   |
| 4     | 4.45      | 138058  | 2.13   | 31548   |
| 5     | 4.71      | 16736   | 0.26   | 4168    |
| 6     | 5.02      | 5632554 | 86.73  | 1036381 |
| 7     | 5.35      | 254781  | 3.92   | 44996   |
| 8     | 5.64      | 44804   | 0.69   | 10046   |
| 9     | 6.25      | 13407   | 0.21   | 2160    |
| 10    | 6.63      | 12615   | 0.19   | 1784    |
| 11    | 8.68      | 58133   | 0.90   | 4513    |
| 12    | 14.05     | 18306   | 0.28   | 1063    |
| 13    | 18.11     | 13327   | 0.21   | 2265    |
| Total |           | 6494103 | 100.00 | 1186762 |

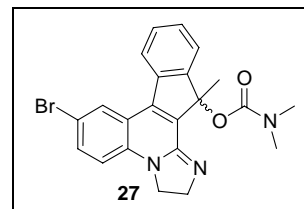

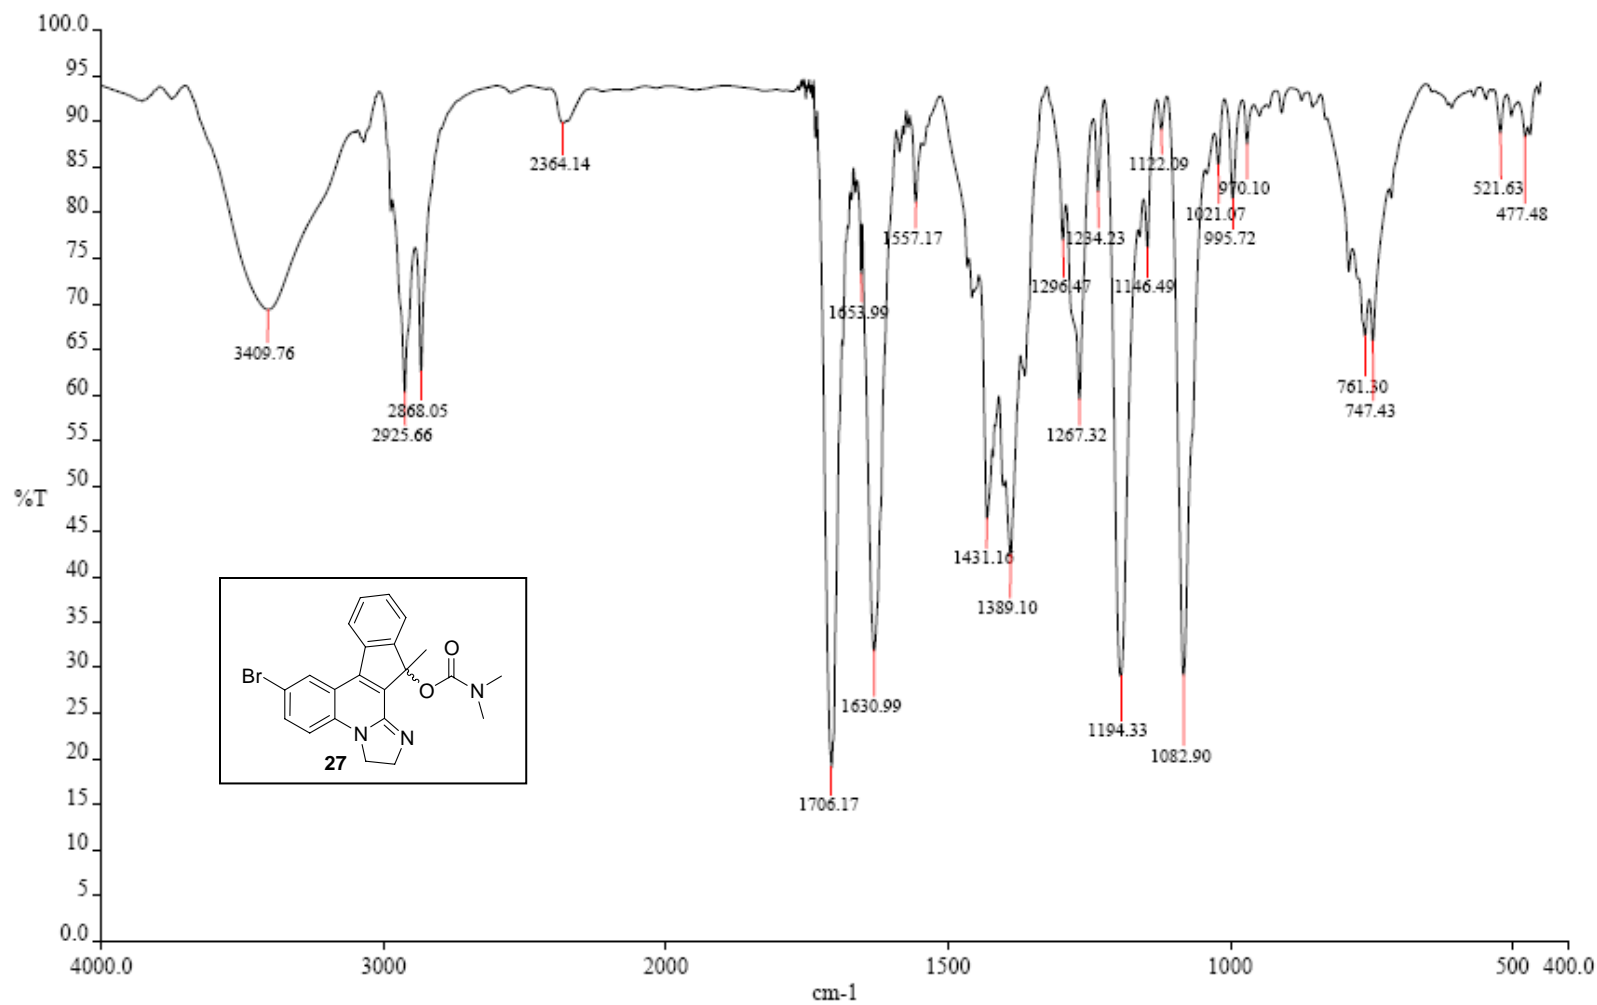

Spectrum Name: CR080-90-69-69A.sp

Analyst: GANESH

Accumulations: 16

Time: 11:32:02 AM

Description: CR080-90-69-69A IN KBr

Resolution: 4.00 cm-1

Date: 2/5/2010

NAME CR080-80-47-08B1  
 EXPNO 1  
 PROCNO 1  
 Date\_ 20091108  
 Time 18.25  
 INSTRUM spect  
 PROBHD 5 mm DUL 13C-1  
 PULPROG zg30  
 TD 32788  
 SOLVENT TFA  
 NS 16  
 DS 0  
 SWH 8278.148 Hz  
 FIDRES 0.252829 Hz  
 AQ 1.9783372 sec  
 RG 812.7  
 DW 80.400 usec  
 DE 8.00 usec  
 TE 292.8 K  
 D1 3.00000000 sec  
 TD0 1

===== CHANNEL f1 =====

NUC1 1H  
 P1 12.60 usec  
 PL1 -1.50 dB  
 SFO1 400.1324710 MHz  
 SI 16384  
 SF 400.1300494 MHz  
 WDW EM  
 SSB 0  
 LB 0.30 Hz  
 GB 0  
 PC 0.60

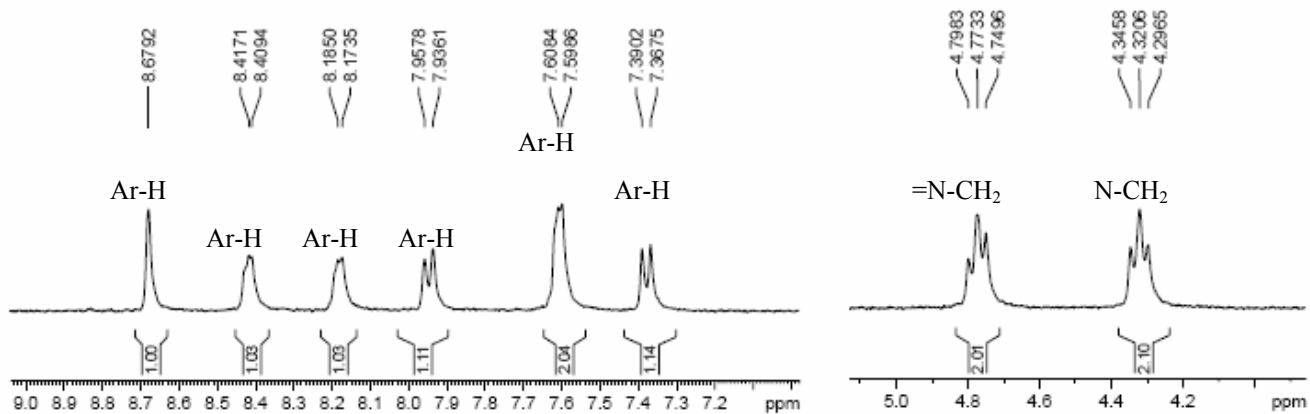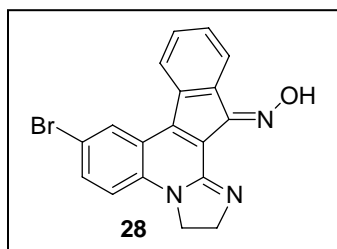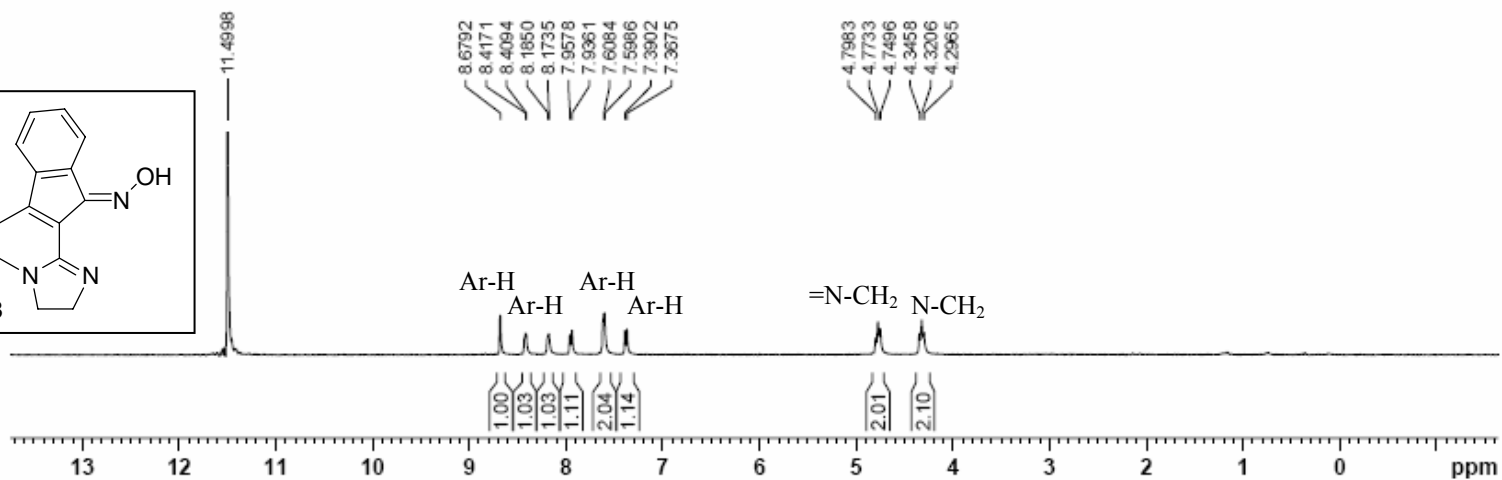

```

NAME CR88-99-47-0381
EXPNO 1
PROCNO 1
Date_ 20100504
Time 21.03
INSTRUM spect
PROBHD 5 mm QNP 13C-1
PULPROG zgpg30
TD 65536
SOLVENT TFA
NS 1
DS 4
SWH 23890.814 Hz
FIDRES 0.365918 Hz
AQ 1.3661755 sec
RG 13004
DW 20.850 usec
DE 4.00 usec
TE 293.0 K
D1 2.0000000 sec
d11 0.0000000 sec
DELTA 1.6999999 sec
TD3 1
===== CHANNEL f1 =====
NUC1 13C
P1 7.00 usec
PL1 -2.00 dB
SFO1 101.6228263 MHz
===== CHANNEL f2 =====
CPDPRG2 waltz16
NUC2 1H
PCPD2 100.00 usec
PL2 -1.00 dB
PL12 -14.92 dB
PL13 -18.82 dB
SFO2 400.1419055 MHz
SI 32768
SF 100.6127795 MHz
WDW EM
SSB 0
LB 0.00 Hz
GB 0
PC 0.20

```

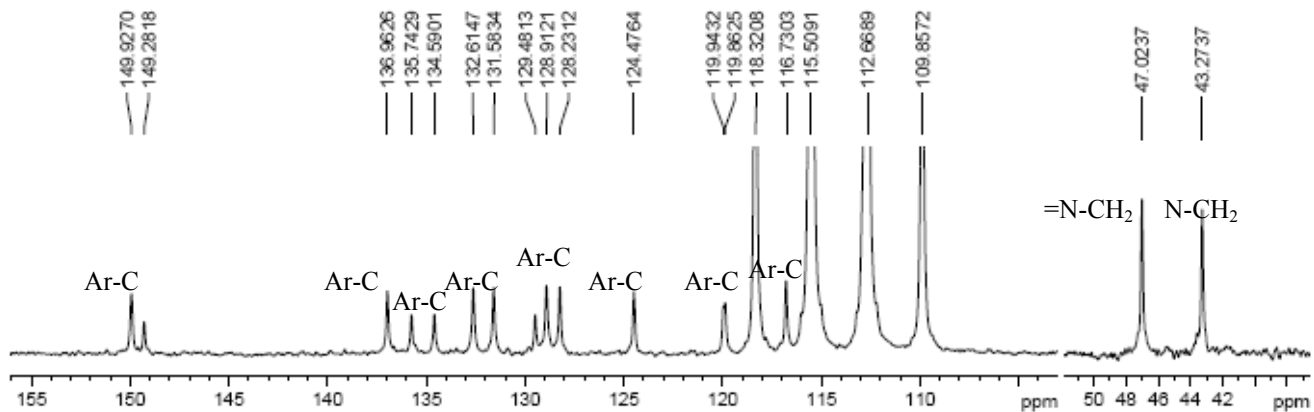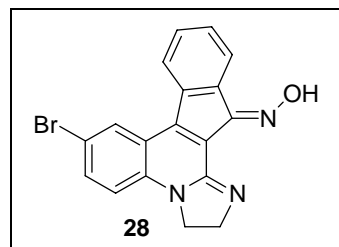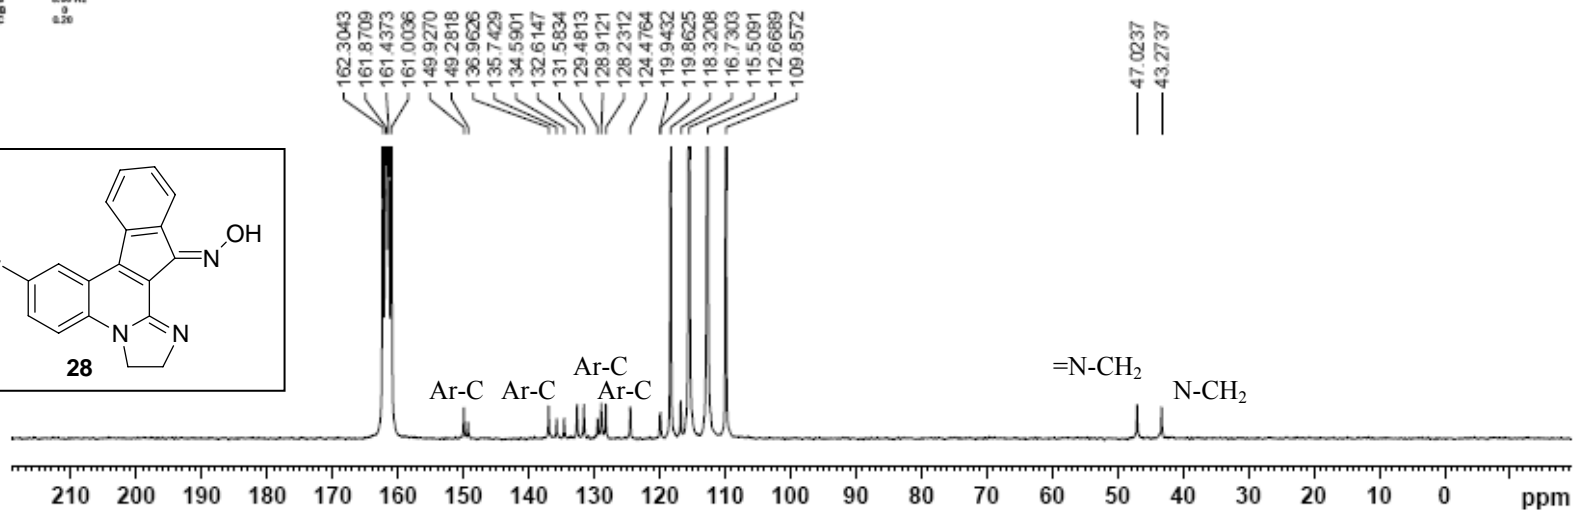

Analysed by: Yogita



Current Data Parameters  
NAME CR080-50-47-53B1  
EXPNO 2  
PROCNO 1

F2 - Acquisition Parameters  
Date\_ 20100305  
Time 15.50  
INSTRUM spect  
PROBHD 5 mm QNP 13C-1  
PULPROG sept135  
TD 65536  
SOLVENT TFA  
NS 20384  
DS 4  
SWH 23585.814 Hz  
FIDRES 0.365918 Hz  
AQ 1.384756 sec  
RG 5160.6  
DW 20.850 usec  
DE 6.00 usec  
TE 292.2 K  
CNS12 145.000000  
D1 2.0000000 sec  
G2 0.00344828 sec  
G12 0.00002000 sec  
DELTA 0.00000000 sec  
TD0 1

===== CHANNEL f1 =====  
NUC1 13C  
P1 7.50 usec  
P2 15.80 usec  
PL1 -2.00 dB  
SFO1 100.6229200 MHz

===== CHANNEL f2 =====  
CPDPRG2 waltz16  
NUC2 1H  
P3 12.50 usec  
P4 25.00 usec  
PCPD2 100.00 usec  
PL2 -1.00 dB  
PL12 14.92 dB  
SFO2 400.1316000 MHz

F2 - Processing parameters  
SI 32768  
SF 100.6127795 MHz  
WDW EM  
SBB 0  
LB 2.00 Hz  
GB 0  
PC 0.20

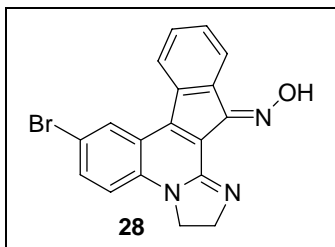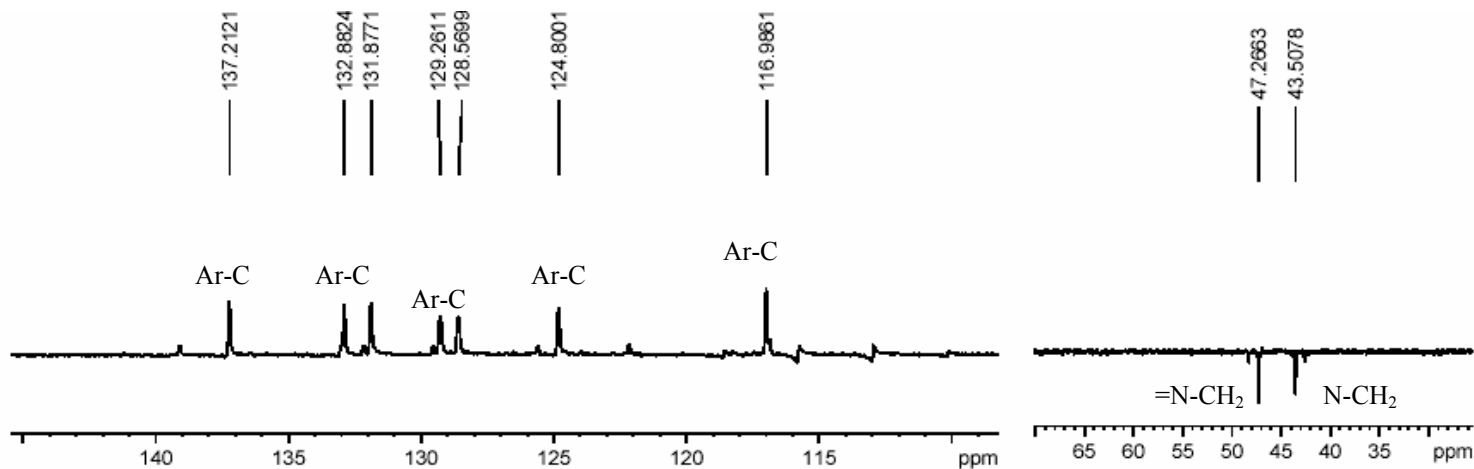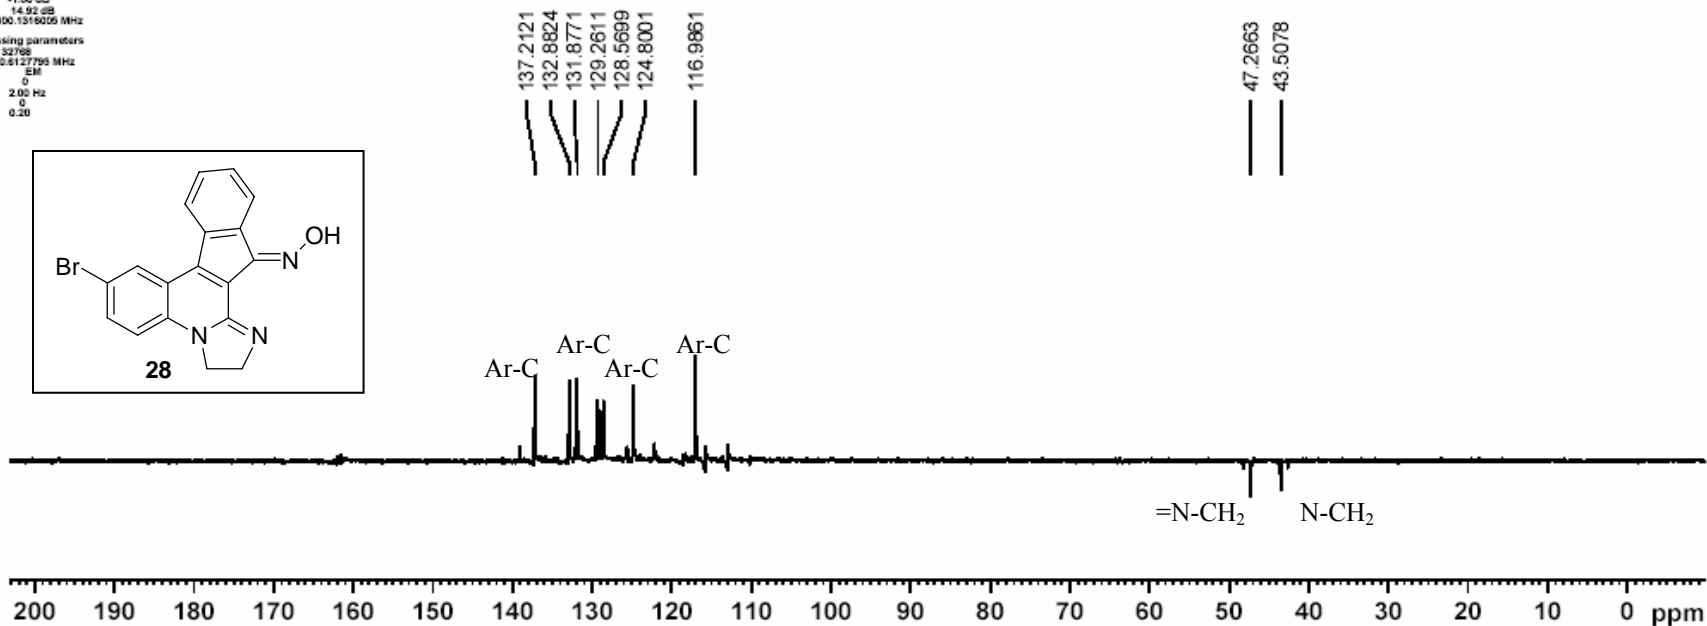

\*

Sample Name: CR080-90-47-03B1

Acq. Time: 18:53

Acq. Date: Monday, November 09, 2009

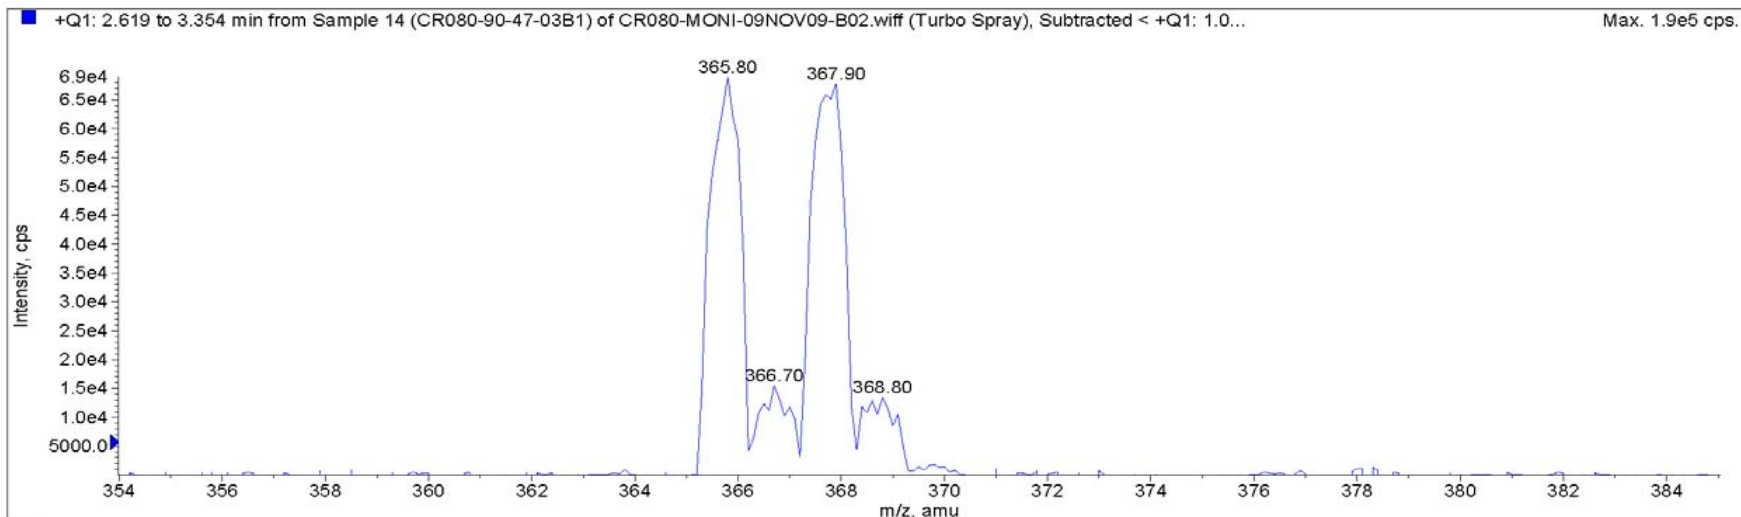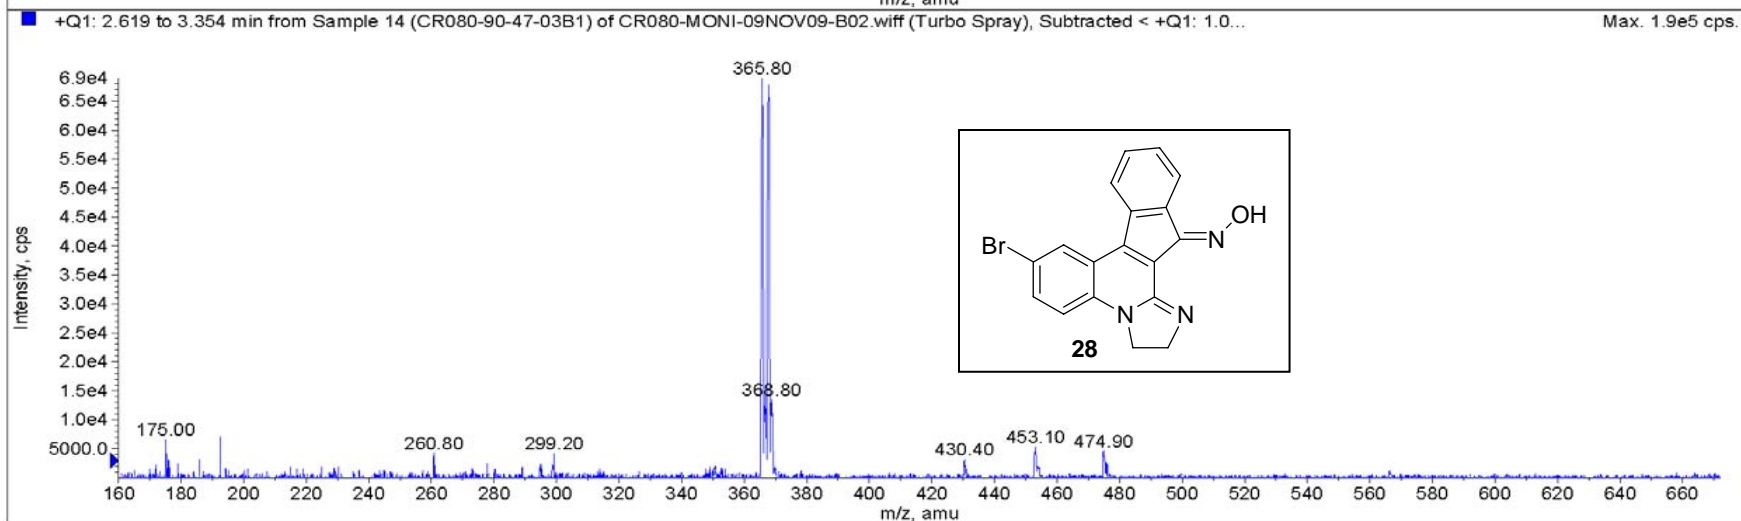

\*Sample Comment: [M+H] 366

Expected

\*\*Analyzed By :

\*\*Checked By :

Sample Name: CR080-90-47-03B1 Acq. Time: 18:53 Acq. Date: Monday, November 09, 2009

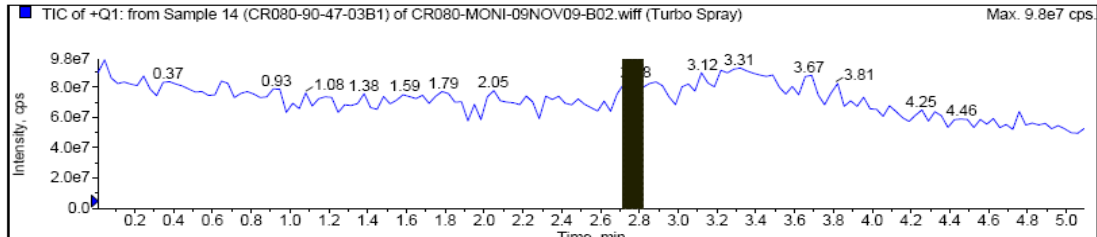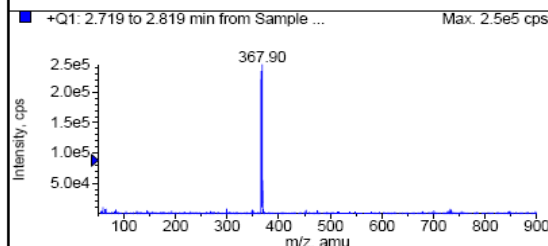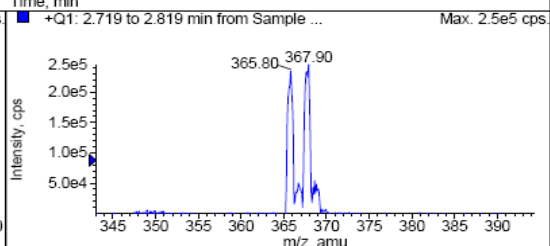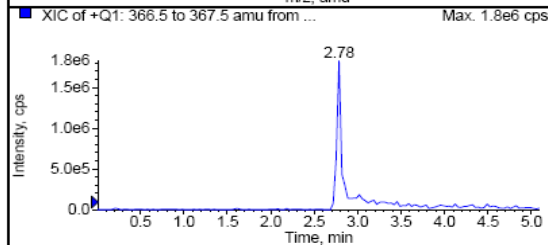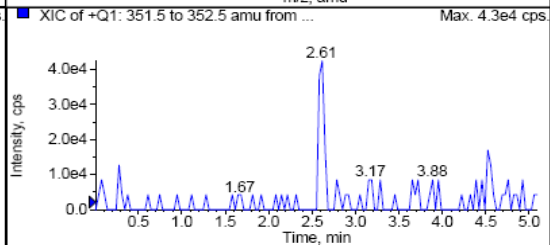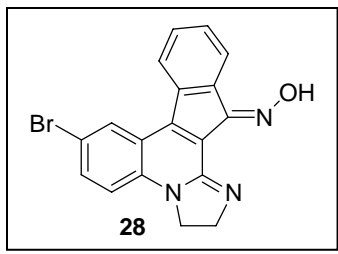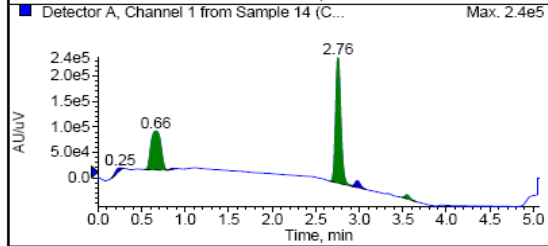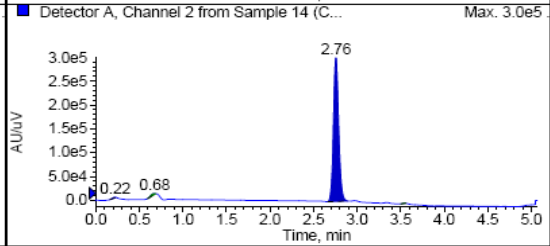

Peak List for "Detector A, Channel 1 from Sample 14 (CR080-90-47"

|   | Time (min) | Area (counts) | % Area  | Height    |
|---|------------|---------------|---------|-----------|
| 3 | 0.8812     | 6425.9238     | 0.3764  | 1229.2909 |
| 4 | 2.7553     | 1.0024e6      | 58.7187 | 2.4521e5  |
| 5 | 2.9767     | 5.3742e4      | 3.1481  | 1.2835e4  |
| 6 | 3.5454     | 2.8991e4      | 1.6982  | 7484.5389 |

Peak List for "Detector A, Channel 2 from Sample 14 (CR080-90-47"

|   | Time (min) | Area (counts) | % Area  | Height    |
|---|------------|---------------|---------|-----------|
| 2 | 0.6752     | 1.0913e4      | 0.8992  | 1808.9480 |
| 3 | 2.7573     | 1.1986e6      | 98.7618 | 3.0097e5  |
| 4 | 3.5470     | 1320.5049     | 0.1088  | 617.3673  |

LCMS-1 REACH MONT (TFA Buffer)  
Channel 1 at wavelength 220nm, Channel 2 at wavelength 260 nm

Analysed By :

Sample Name : CR080-90-47-03B1  
 Sample ID : CR080-90-47-03B1  
 Column : Xterra RP-18 (250 x 4.6 mm) 5u  
 Vial # : 23  
 Inj. Volume : 4 uL  
 Tray # : 2  
 Acquired by : AVINASH

Data File Name : 17-02-10\_CR080-90-47-03B1\_02.lcd  
 Method File Name : GENERAL\_B11.lcm  
 Batch File Name : 170210.lcb  
 Data Acquired : 2/18/2010 5:05:56 AM  
 Data Processed : 2/18/2010 5:35:59 AM  
 Ref.No.: DI/A0257/98

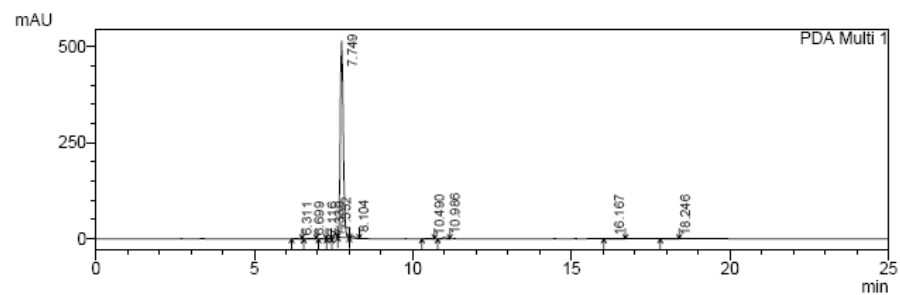

1 PDA Multi 1/252nm 4nm

PeakTable

| Peak# | Ret. Time | Area    | Area % | Height |
|-------|-----------|---------|--------|--------|
| 1     | 6.31      | 3452    | 0.10   | 534    |
| 2     | 6.70      | 3362    | 0.10   | 319    |
| 3     | 7.12      | 1029    | 0.03   | 153    |
| 4     | 7.34      | 729     | 0.02   | 160    |
| 5     | 7.55      | 50295   | 1.45   | 9915   |
| 6     | 7.75      | 3328354 | 96.02  | 511507 |
| 7     | 8.10      | 36183   | 1.04   | 5768   |
| 8     | 10.49     | 7190    | 0.21   | 885    |
| 9     | 10.99     | 28623   | 0.83   | 3718   |
| 10    | 16.17     | 3454    | 0.10   | 328    |
| 11    | 18.25     | 3510    | 0.10   | 132    |
| Total |           | 3466182 | 100.00 | 533419 |

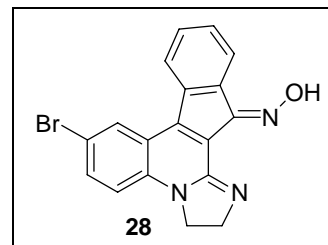

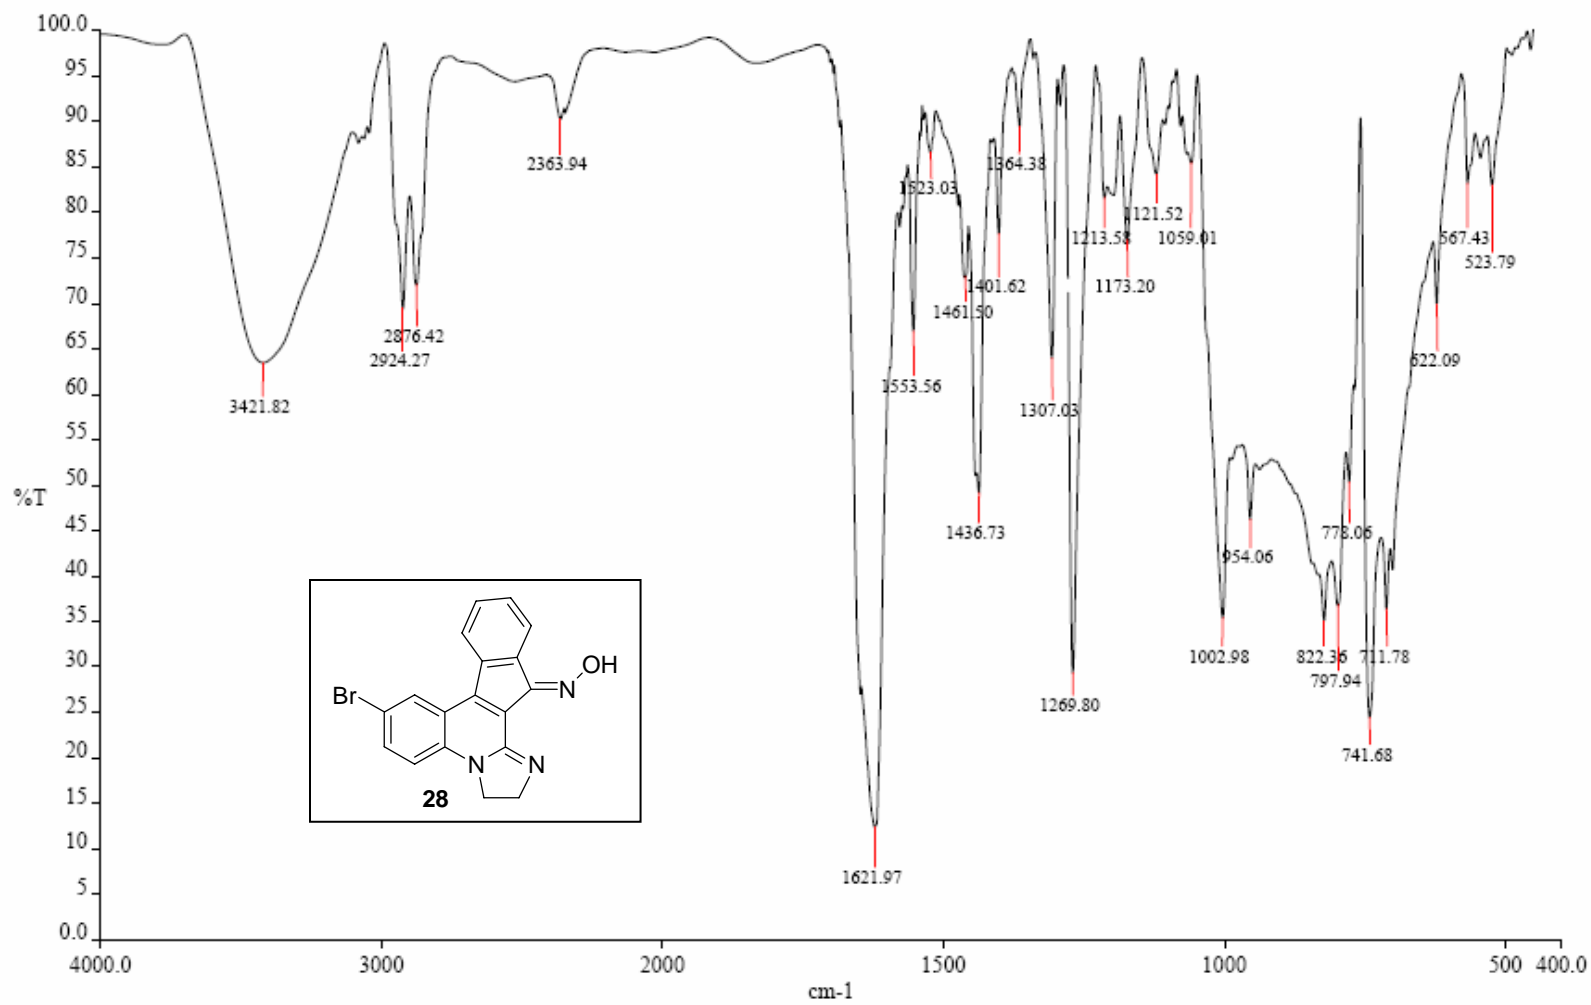

Spectrum Name: CR080-90-47-03B1.sp

Analyst: GANESH

Accumulations: 16

Time: 10:01:14 AM

Description: CR080-90-47-03B1 IN KBr

Resolution: 4.00 cm-1

Date: 2/5/2010

NAME CR080-80-48-48A3  
 EXPNO 1  
 PROCNO 1  
 Date\_ 20081113  
 Time 16.63  
 INSTRUM spect  
 PROBHD 5 mm DUL 13C-1  
 PULPROG zg30  
 TD 32788  
 SOLVENT CDCl3  
 NS 32  
 DS 0  
 SWH 8278.148 Hz  
 FIDRES 0.252829 Hz  
 AQ 1.9782372 sec  
 RG 646.1  
 DW 80.400 usec  
 DE 6.00 usec  
 TE 291.1 K  
 D1 3.00000000 sec  
 D0 1  
 ===== CHANNEL f1 =====  
 NUC1 1H  
 P1 12.50 usec  
 PL1 -1.30 dB  
 SFO1 400.1324710 MHz  
 SI 18384  
 SF 400.1300128 MHz  
 WDW EM  
 SSB 0  
 LB 0.30 Hz  
 GB 0  
 PC 0.60

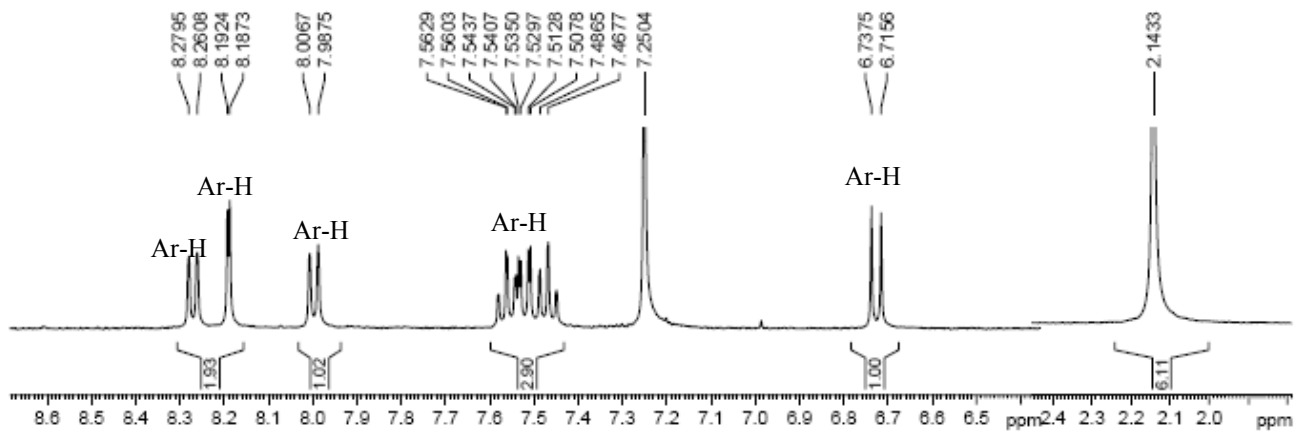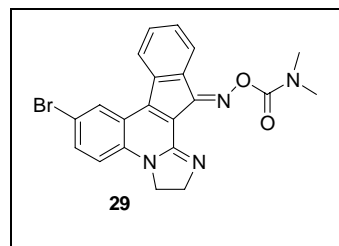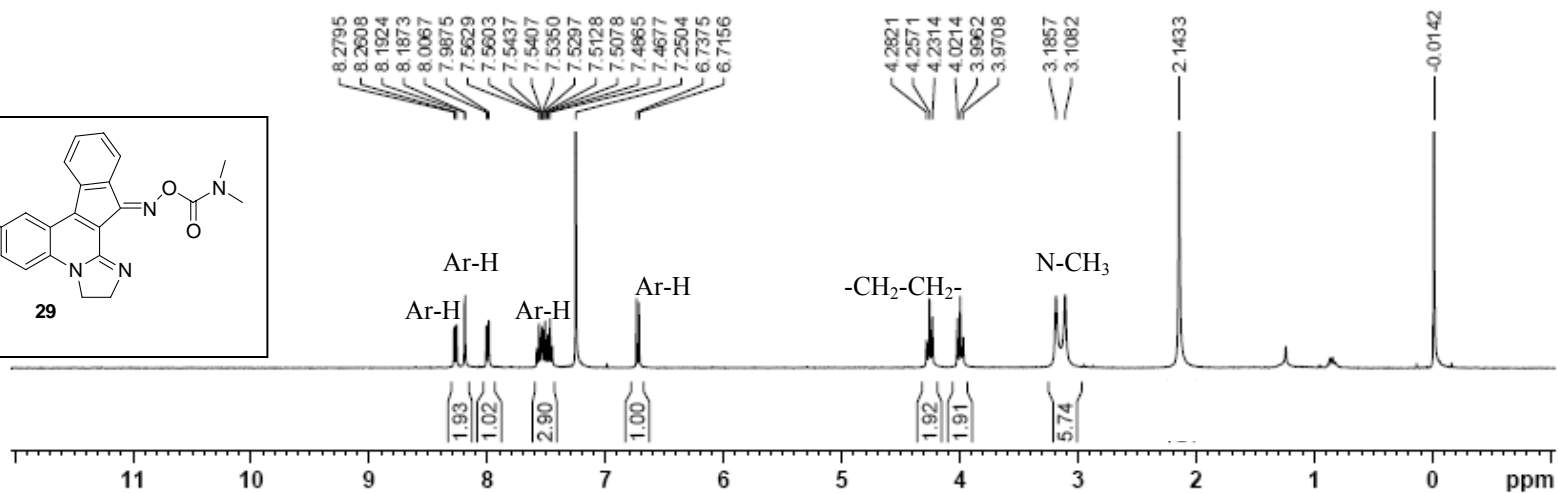

NAME CR080-80-48-48A3  
 EXPNO 2  
 PROCNO 1  
 Date\_ 20081113  
 Time 18.25  
 INSTRUM spect  
 PROBHD 5 mm DUL 13C-1  
 PULPROG zg30  
 TD 32788  
 SOLVENT CDCl3  
 NS 18  
 DS 0  
 SWH 8278.148 Hz  
 FIDRES 0.252828 Hz  
 AQ 1.9782372 sec  
 RG 845.1  
 DW 80.400 usec  
 DE 8.00 usec  
 TE 282.4 K  
 D1 3.00000000 sec  
 TD0 1  
 ----- CHANNEL f1 -----  
 NUC1 1H  
 P1 12.60 usec  
 PL1 -1.00 dB  
 SFO1 400.1324710 MHz  
 SI 18384  
 SF 400.1300128 MHz  
 WDW EM  
 SSB 0  
 LB 0.30 Hz  
 GB 0  
 PC 0.60

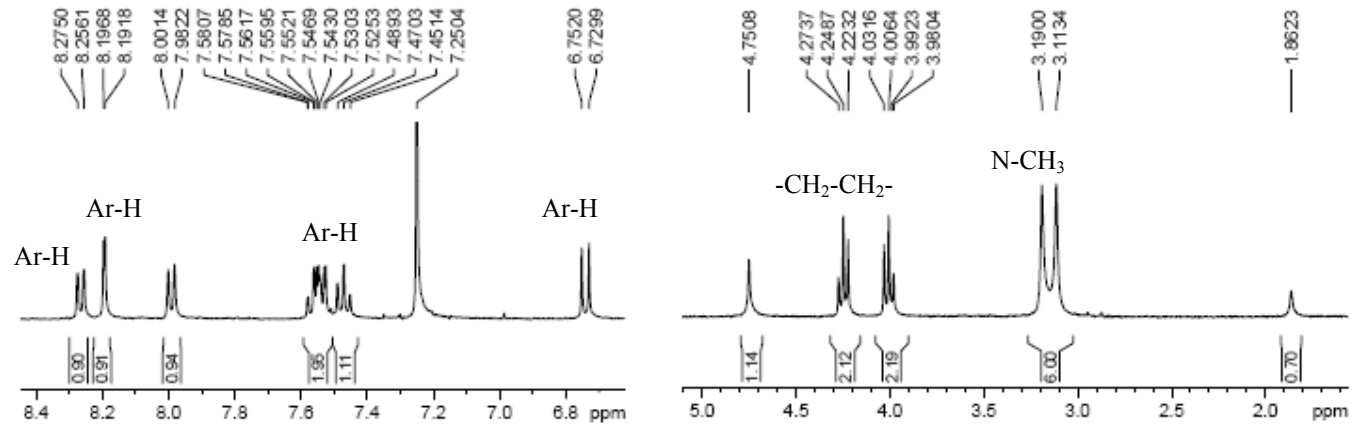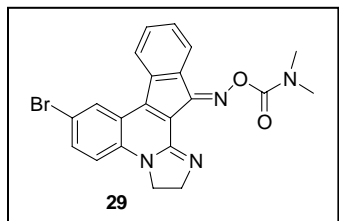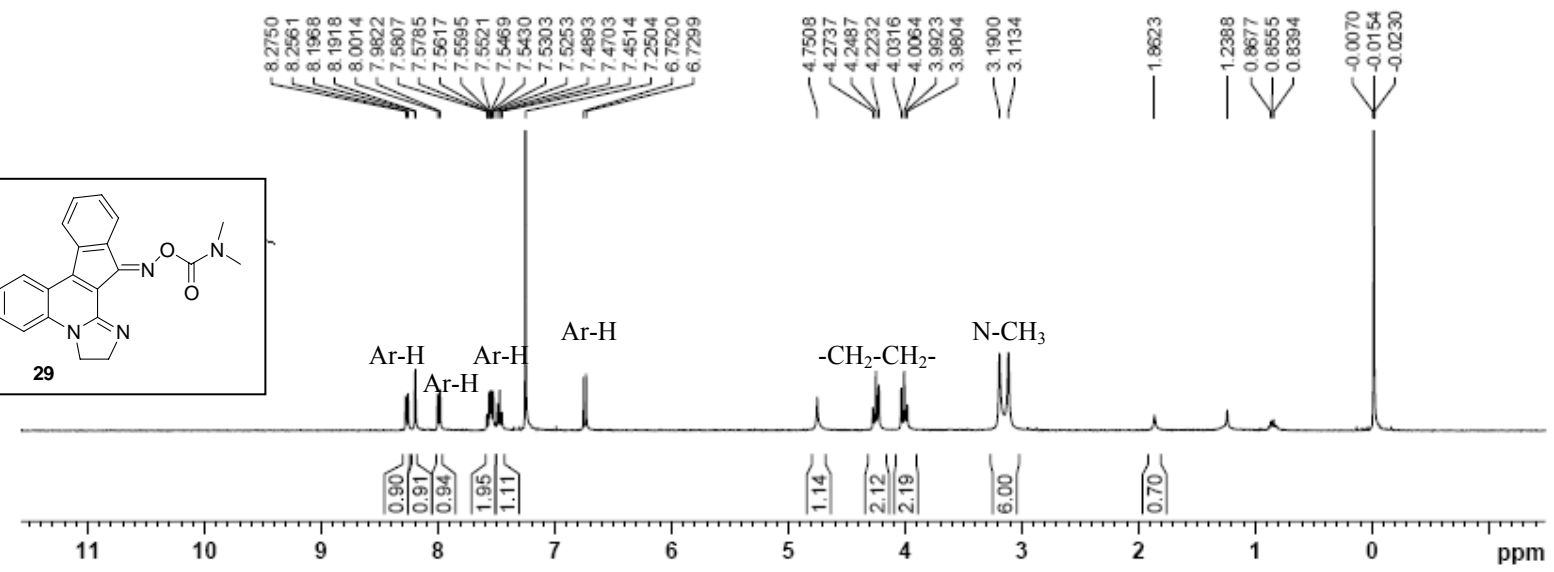

NAME CR080-80-48-48A-3  
 EXPNO 1  
 PROCNO 1  
 Date\_ 20100220  
 Time 11.27  
 INSTRUM spect  
 PROBHD 5 mm DUL 13C-1  
 PULPROG zgpg30  
 TD 66636  
 SOLVENT CDCl3  
 NS 5614  
 DS 4  
 SWH 23980.814 Hz  
 FIDRES 0.385518 Hz  
 AQ 1.3884768 sec  
 RG 7288.2  
 DW 25.850 usec  
 DE 5.00 usec  
 TE 293.0 K  
 D1 2.00000000 sec  
 d11 0.03000000 sec  
 DELTA 1.38888888 sec  
 TD0 1

===== CHANNEL f1 =====  
 NUC1 13C  
 P1 7.80 usec  
 PL1 -2.00 dB  
 SFO1 100.6228298 MHz

===== CHANNEL f2 =====  
 CPDPRG2 waltz16  
 NUC2 1H  
 PCPD2 100.00 usec  
 PL2 -1.00 dB  
 PL12 14.82 dB  
 PL18 18.82 dB  
 SFO2 400.1318006 MHz  
 S1 32768  
 S2 100.6127768 MHz  
 WDW EM  
 SSB 0  
 LB 8.00 Hz  
 GB 0  
 PC 0.20

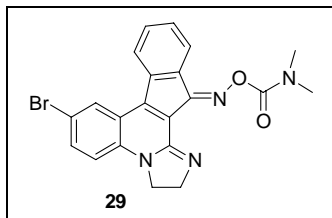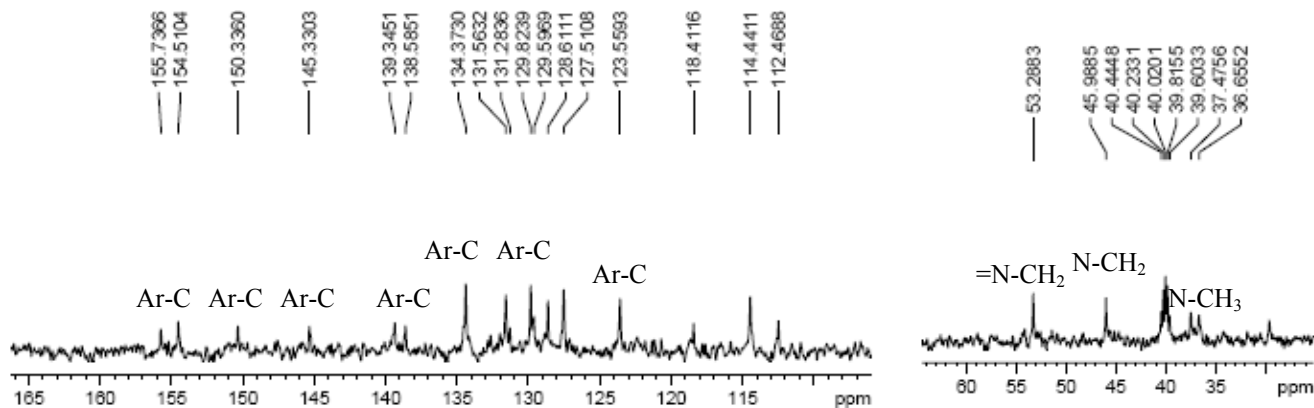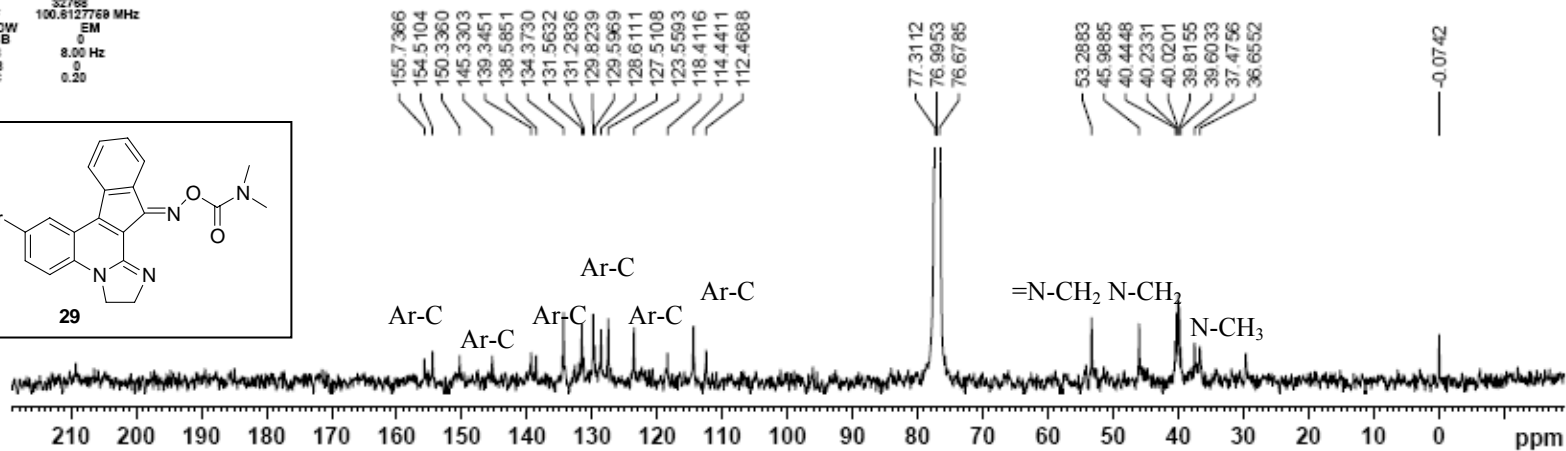



NAME CR00-00-18-48A3  
 EXPNO 5  
 PROCNO 1  
 Date\_ 20190413  
 Time 22:33  
 INSTRUM spect  
 PROBHD 5 mm DUL 13C-1  
 PULPROG zgpg30  
 TD 65536  
 SOLVENT CDCl3  
 RE 12900  
 DS 4  
 SWH 32063.814 Hz  
 FREQS 8.350918 Hz  
 AQ 1.3894756 sec  
 RG 2563  
 EQ 0.250 usec  
 DE 0.90 usec  
 TE 293.2 K  
 CHST2 145.000000  
 D1 2.8000000 sec  
 d2 0.0034428 sec  
 d12 0.0000250 sec  
 DELTA 6.0000003 sec  
 TD0 1

===== CHANNEL f1 =====  
 NUQ1 13C  
 P1 7.00 usec  
 PC 15.00 usec  
 PL1 -2.00 dB  
 SFO1 101.625188 MHz

===== CHANNEL f2 =====  
 CPDPRG2 waltz16  
 NUQ2 1H  
 P2 12.00 usec  
 PC 25.00 usec  
 PCPD2 100.00 usec  
 PL1 -1.00 dB  
 PL2 14.00 dB  
 SFO2 400.141885 MHz  
 SI 32768  
 SF 100.6251276 MHz  
 NDAQ 64  
 SSB 0  
 LB 6.00 Hz  
 GB 0  
 PC 0.20

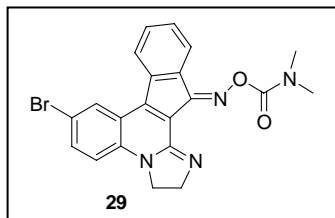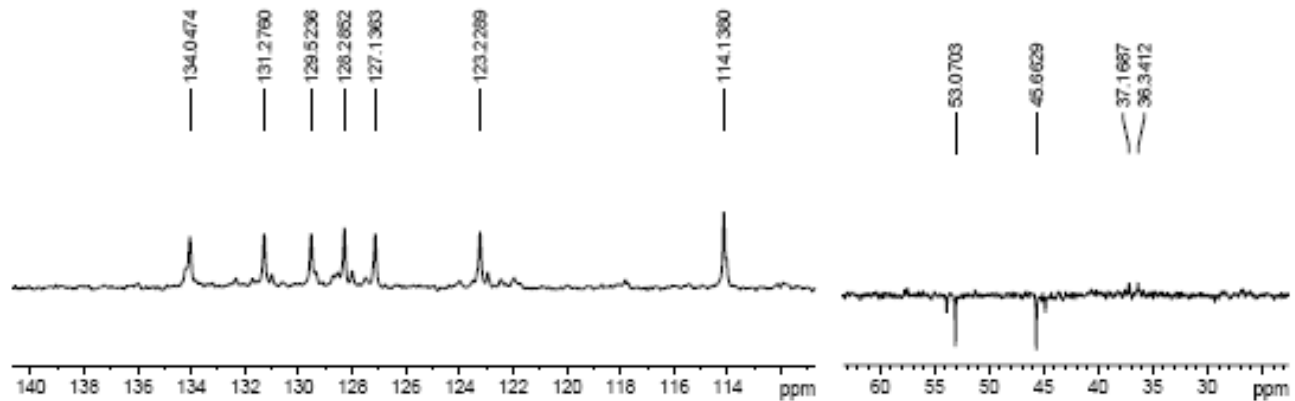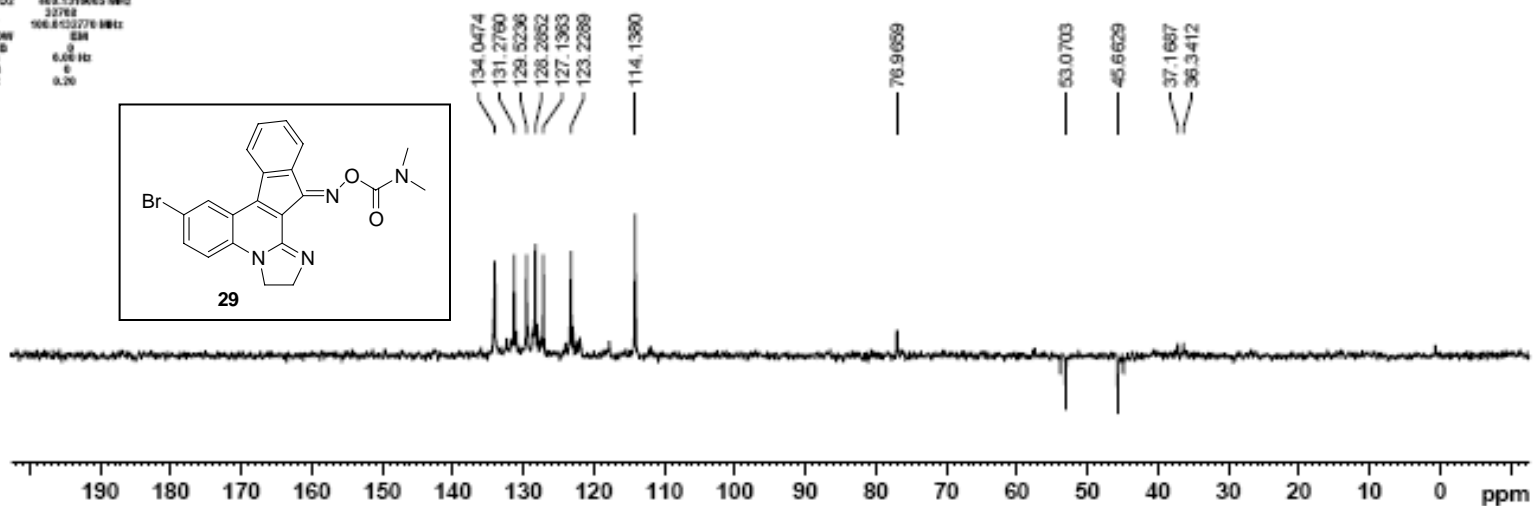

Sample Name: CR080-90-49-49A3 Acq. Time: 17:03 Acq. Date: Friday, November 13, 2009

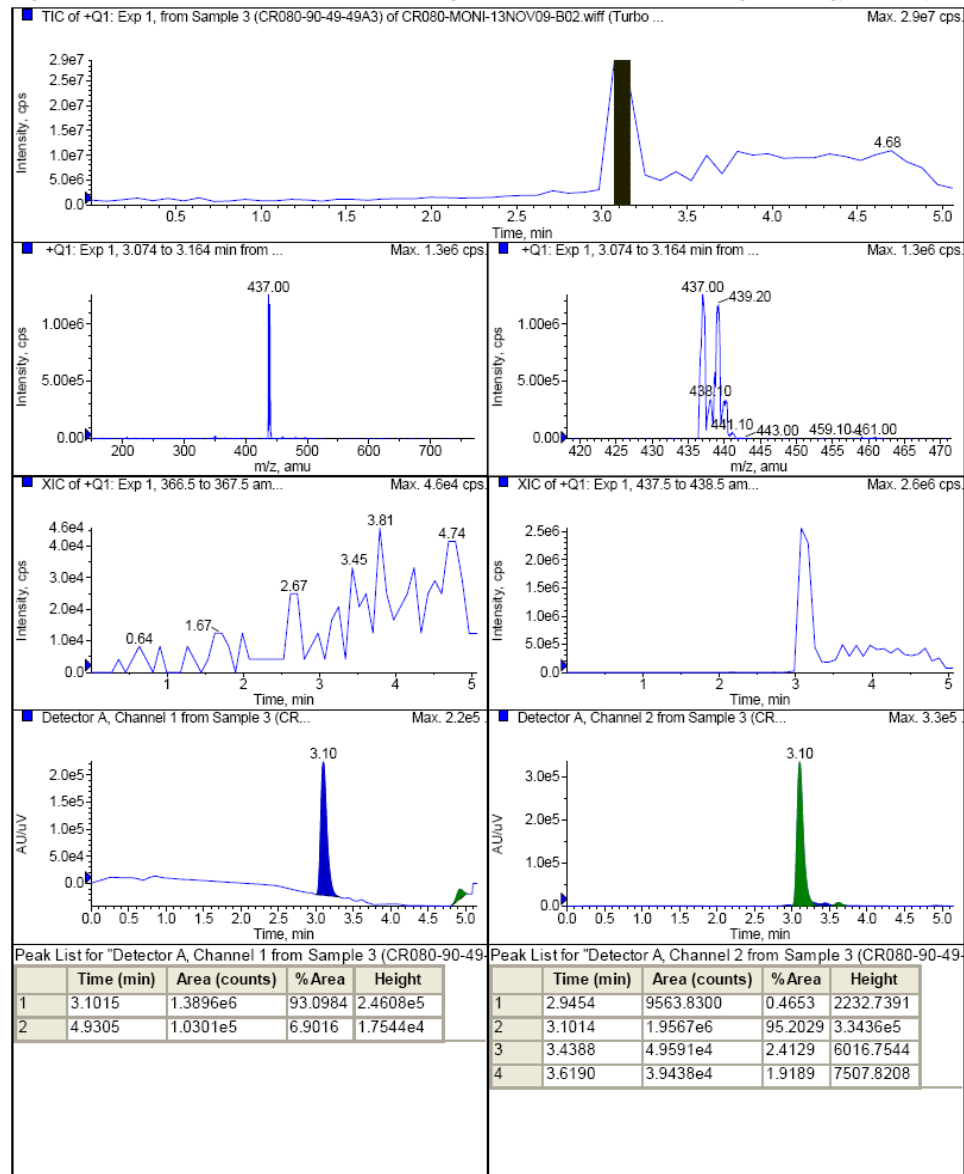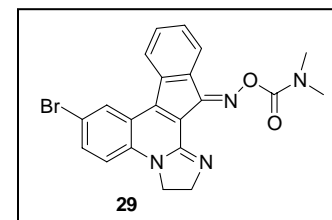

LCMS 2 Reaction Monitoring (RE40ac Buffer)  
 \*Channel 1 at wavelength 220 nm . Channel 2 at wavelength 260 nm

Analyzed By :

```

=====
Sample:CR080-90-49-49A3                                     ->
Column:GEMINI-C18 (150X4.6)mm 5µ
Injection date   : Tue, 17. Nov. 2009                      Location   :      Vial 15
Sample Name     : CR080-90-49-49A3                        Inj. No.   :      1
Acq Operator    : PRAKASH                                  Inj. Vol.  :      5 µl
Analysis Method : C:\CHEM32\2\METHODS\UPLC_GENARAL_GRAD_G1.M
Last Changed    : Wed, 18. Nov. 2009,
Acq. Method     :C:\Chem32\2\DATA\NOV-09\171109F 2009-11-17 17-19-25\
                  UPLC_GENARAL_GRAD_G1.M
Method ref      :DI/A0257/50
=====

```

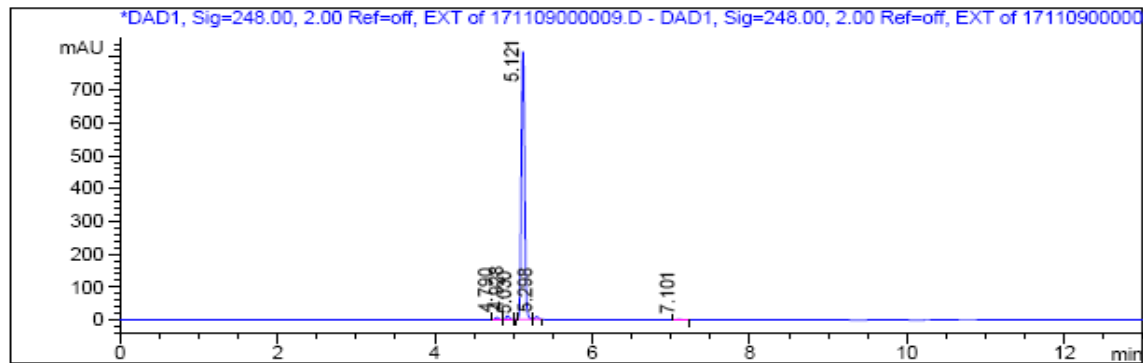

DAD1, Sig=248.00, 2.00 Ref=off, EXT

| Peak # | RT (Min) | Width (Min) | Area     | Area % |
|--------|----------|-------------|----------|--------|
| 1      | 4.790    | 0.047       | 20.452   | 0.828  |
| 2      | 4.928    | 0.048       | 33.080   | 1.339  |
| 3      | 5.030    | 0.023       | 0.458    | 0.019  |
| 4      | 5.121    | 0.048       | 2385.486 | 96.560 |
| 5      | 5.298    | 0.046       | 22.999   | 0.931  |
| 6      | 7.101    | 0.070       | 7.986    | 0.323  |

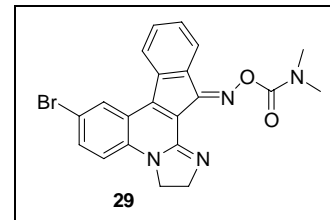

\*\*\* End of Report\*\*\*

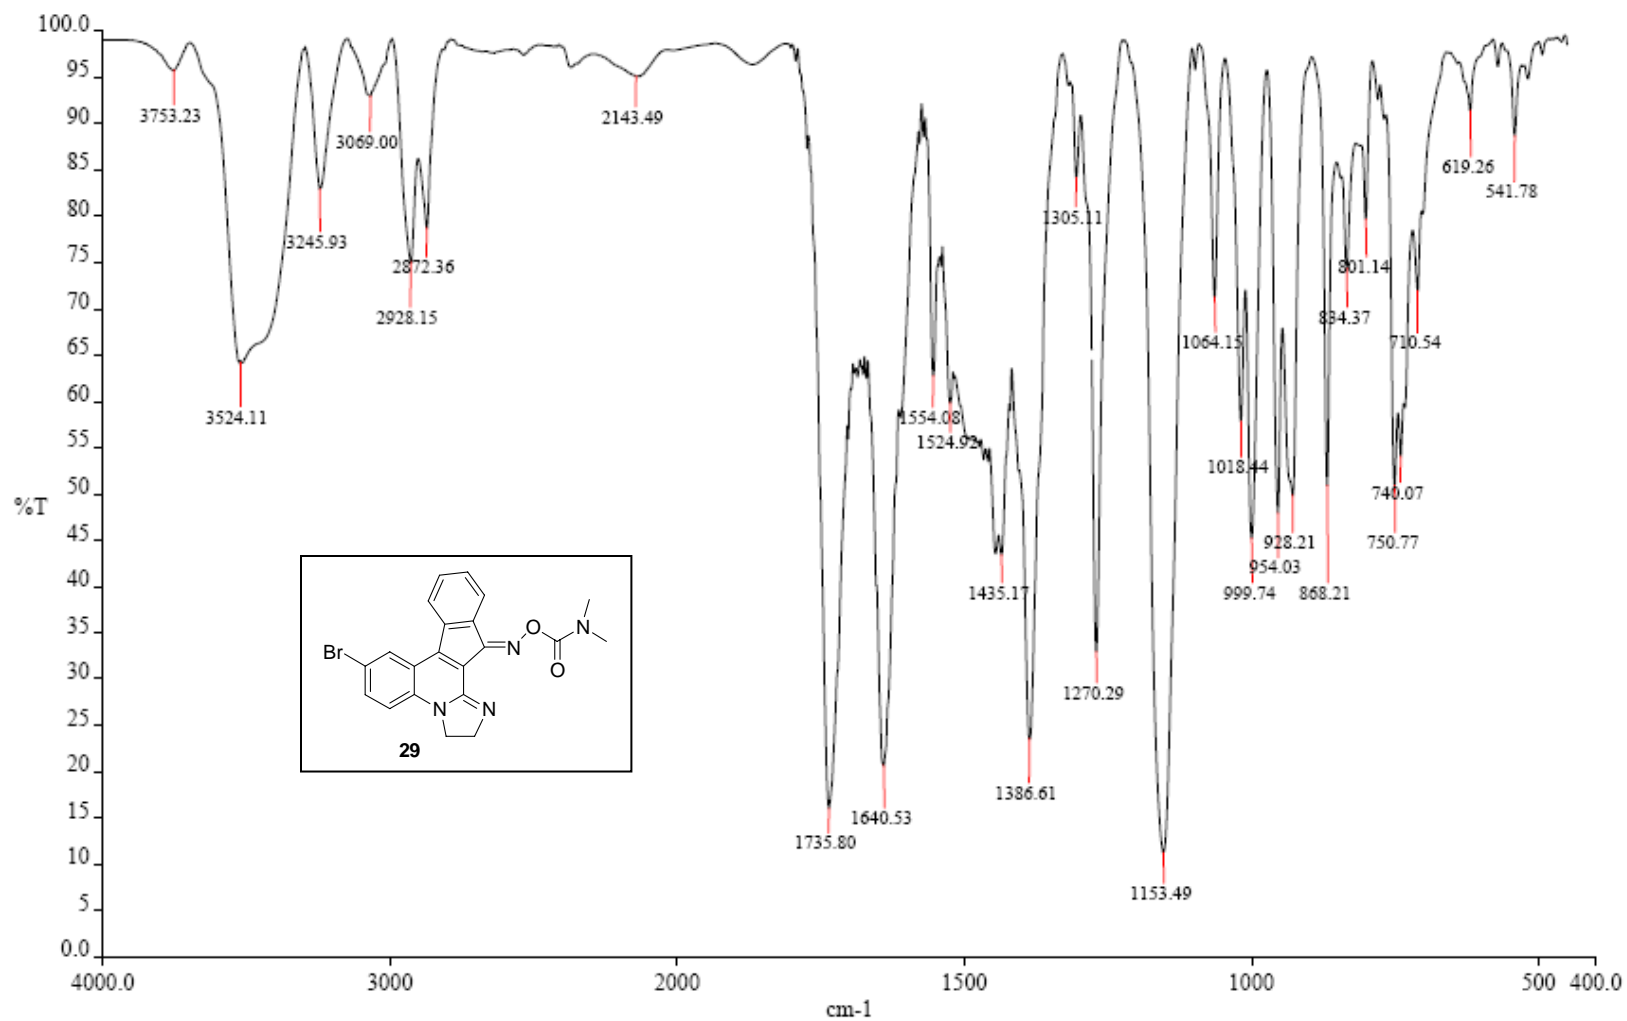

Spectrum Name: CR080-90-49-49A3.sp

Analyst: GANESH

Accumulations: 16

Time: 10:15:44 AM

Description: CR080-90-49-49A3 IN KBr

Resolution: 4.00 cm-1

Date: 2/5/2010

**Table S1:** Comparison of Chemical shift values ( $\delta$ ) of quinoline ring protons after formation of fused ring system<sup>¶</sup>

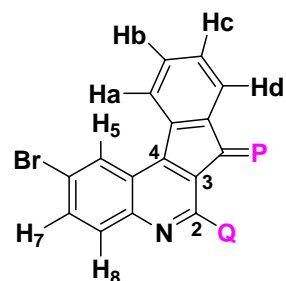

- 2b : P = O, Q = Methoxy  
 2c : P = O, Q = Trifluoromethyl  
 2d : P = O, Q = Imidazol-1-yl  
 2e : P = O, Q = 1H-Pyrazol-1-yl  
 2f : P = O, Q = 4-(2-Pyridyl)-piperazin-1-yl  
 2g : P = NOH, Q = Imidazol-1-yl  
 2h : P = NOH, Q = 4-(2-Pyridyl)-piperazin-1-yl  
 6 : P = O, Q = Cl

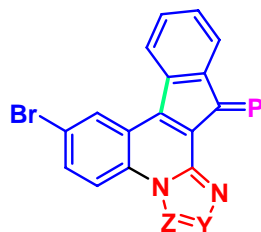

- 7 : Y=Z=N, P=O  
 8 : Y=Z=N, P=NOH  
 9 : Y=Z=N, P= N-O-C-N(CH<sub>3</sub>)<sub>2</sub>  
 15 : Y=N; Z=CH, P=O  
 17 : Y=N; Z=(C-CH<sub>3</sub>), P=O  
 23 : Y=NH; Z=(C=S), P=O  
 25 : Y=Z=CH<sub>2</sub>, P=O  
 28 : Y=Z=CH<sub>2</sub>, P=NOH

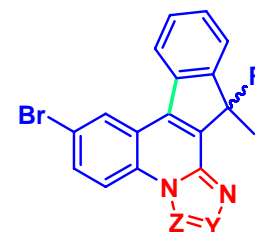

- 13: Y=Z=N, R=O-C(=O)-(CH<sub>2</sub>)<sub>5</sub>CH<sub>3</sub>  
 27: Y=Z=CH<sub>2</sub>, R=O-C(=O)-N(CH<sub>3</sub>)<sub>2</sub>

| Structure        | H <sub>5</sub>                          | H <sub>7</sub>                                | H <sub>8</sub>                          | Ha                                      | Hb                                      | Hc                                      | Hd                                      | Other signals                     |
|------------------|-----------------------------------------|-----------------------------------------------|-----------------------------------------|-----------------------------------------|-----------------------------------------|-----------------------------------------|-----------------------------------------|-----------------------------------|
| <p><b>6</b></p>  | 9.00<br>( <i>d</i> , <i>J</i> = 1.9 Hz) | 8.27<br>( <i>dd</i> , <i>J</i> = 1.9, 9.1 Hz) | 8.12<br>( <i>d</i> , <i>J</i> = 9.1 Hz) | 8.66<br>( <i>d</i> , <i>J</i> = 7.6 Hz) | 7.90<br>( <i>m</i> )                    | 7.78<br>( <i>t</i> , <i>J</i> = 7.4 Hz) | 7.90<br>( <i>m</i> )                    |                                   |
| <p><b>2b</b></p> | 8.66<br>( <i>d</i> , <i>J</i> = 1.9 Hz) | 7.95<br>( <i>dd</i> , <i>J</i> = 1.9, 9.1 Hz) | 7.77<br>( <i>d</i> , <i>J</i> = 9.1 Hz) | 8.34<br>( <i>d</i> , <i>J</i> = 7.6 Hz) | 7.70<br>( <i>t</i> , <i>J</i> = 7.6 Hz) | 7.58<br>( <i>t</i> , <i>J</i> = 7.6 Hz) | 7.66<br>( <i>d</i> , <i>J</i> = 7.2 Hz) | 4.08 ( <i>s</i> ) CH <sub>3</sub> |

|                                                                                                                   |                                         |                                               |                                         |                                         |                                                  |                                         |                                         |                                                                                                            |
|-------------------------------------------------------------------------------------------------------------------|-----------------------------------------|-----------------------------------------------|-----------------------------------------|-----------------------------------------|--------------------------------------------------|-----------------------------------------|-----------------------------------------|------------------------------------------------------------------------------------------------------------|
| 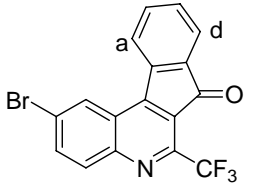 <p><b>2c</b></p>                | 8.89<br>( <i>d</i> , <i>J</i> = 1.9 Hz) | 8.20<br>( <i>dd</i> , <i>J</i> = 1.9, 9.1 Hz) | 8.14<br>( <i>d</i> , <i>J</i> = 9.1 Hz) | 8.51<br>( <i>d</i> , <i>J</i> = 7.6 Hz) | 7.78<br>( <i>dt</i> , <i>J</i> = 1.1, 7.6 Hz)    | 7.66<br>( <i>t</i> , <i>J</i> = 7.4 Hz) | 7.76<br>( <i>d</i> , <i>J</i> = 6.8 Hz) |                                                                                                            |
|  <p><b>2d</b></p>                | 8.90<br>( <i>d</i> , <i>J</i> = 1.9 Hz) | 8.13<br>( <i>dd</i> , <i>J</i> = 1.9, 8.8 Hz) | 8.01<br>( <i>d</i> , <i>J</i> = 8.8 Hz) | 8.55<br>( <i>d</i> , <i>J</i> = 7.6 Hz) | 7.80<br>( <i>dt</i> , <i>J</i> = 1.3, 7.6 Hz)    | 7.67<br>( <i>t</i> , <i>J</i> = 7.6 Hz) | 7.78<br>( <i>d</i> , <i>J</i> = 7.6 Hz) | 8.44 ( <i>t</i> , <i>J</i> = 1 Hz) H2', 7.89 ( <i>t</i> , <i>J</i> = 1.3 Hz) H5', 7.13 ( <i>t</i> ) H4'    |
|  <p><b>2dH<sup>+</sup></b></p>   | 9.01<br>( <i>d</i> , <i>J</i> = 1.9 Hz) | 8.24<br>( <i>dd</i> , <i>J</i> = 1.9, 9.1 Hz) | 8.11<br>( <i>d</i> , <i>J</i> = 9.1 Hz) | 8.65<br>( <i>d</i> , <i>J</i> = 7.6 Hz) | 7.85<br>( <i>dt</i> , <i>J</i> = 1.3, 7.6, Hz)   | 7.71<br>( <i>t</i> , <i>J</i> = 7.4 Hz) | 7.82<br>( <i>d</i> , <i>J</i> = 7.3 Hz) | 9.85 ( <i>t</i> , <i>J</i> = 1.3 Hz) H2', 8.35 ( <i>t</i> , <i>J</i> = 1.7 Hz) H5', 7.98 ( <i>t</i> ) H4'  |
|  <p><b>2e</b></p>               | 8.88<br>( <i>d</i> , <i>J</i> = 1.9 Hz) | 8.11<br>( <i>dd</i> , <i>J</i> = 1.9, 8.8 Hz) | 8.01<br>( <i>d</i> , <i>J</i> = 8.8 Hz) | 8.51<br>( <i>d</i> , <i>J</i> = 7.6 Hz) | 7.78<br>( <i>dt</i> , <i>J</i> = 7.6, 1.3 Hz)    | 7.65<br>( <i>t</i> , <i>J</i> = 7.4 Hz) | 7.72<br>( <i>d</i> , <i>J</i> = 7.3 Hz) | 8.42 ( <i>d</i> , <i>J</i> = 2.5 Hz) H3', 7.84 ( <i>d</i> , <i>J</i> = 1.6 Hz) H5', 6.59 ( <i>dd</i> ) H4' |
|  <p><b>2eH<sup>+</sup></b></p> | 8.85<br>( <i>br. s</i> )                | 8.07<br>( <i>d</i> , <i>J</i> = 8.8 Hz)       | 7.97<br>( <i>d</i> , 8.8 Hz)            | 8.49<br>( <i>d</i> , 7.6 Hz)            | 7.75<br>( <i>dt</i> , <i>J</i> = 7.6 Hz, 1.3 Hz) | 7.61<br>( <i>t</i> , <i>J</i> = 7.4 Hz) | 7.69<br>( <i>d</i> , <i>J</i> = 7.3 Hz) | 8.41 ( <i>s</i> ) H3', 7.83 ( <i>s</i> ) H5', 6.57 ( <i>d</i> ) H4'                                        |

|                                                                                                                  |                                    |                                          |                                      |                                      |                                      |                                      |                                      |                                                                                                                                                                                                       |
|------------------------------------------------------------------------------------------------------------------|------------------------------------|------------------------------------------|--------------------------------------|--------------------------------------|--------------------------------------|--------------------------------------|--------------------------------------|-------------------------------------------------------------------------------------------------------------------------------------------------------------------------------------------------------|
| 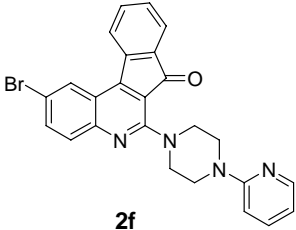 <p><b>2f</b></p>               | 8.62 ( <i>d</i> , <i>J</i> = 2 Hz) | 7.86 ( <i>dd</i> , <i>J</i> = 2, 9.1 Hz) | 7.66 ( <i>d</i> , <i>J</i> = 9.1 Hz) | 8.33 ( <i>d</i> , <i>J</i> = 7.6 Hz) | 7.70 ( <i>t</i> , <i>J</i> = 7.3 Hz) | 7.57 ( <i>t</i> , <i>J</i> = 7.3 Hz) | 7.67 ( <i>d</i> , <i>J</i> = 7.6 Hz) | 8.15 ( <i>dd</i> , <i>J</i> = 1.7, 4.7 Hz), 7.56 ( <i>ddd</i> , <i>J</i> = 1.9, 6.9, 8.8 Hz), 6.89 ( <i>d</i> , <i>J</i> = 8.5 Hz), 6.67 ( <i>dd</i> , <i>J</i> = 6.9, 4.7 Hz), 3.72 ( <i>s</i> , 8H) |
|  <p><b>2fH<sup>+</sup></b></p>  | 8.65 ( <i>d</i> , <i>J</i> = 2 Hz) | 7.90 ( <i>dd</i> , <i>J</i> = 2, 9.1 Hz) | 7.69 ( <i>d</i> , <i>J</i> = 9.1 Hz) | 8.37 ( <i>d</i> , <i>J</i> = 7.6 Hz) | 7.71 ( <i>t</i> , <i>J</i> = 7.3 Hz) | 7.57 ( <i>t</i> , <i>J</i> = 7.3 Hz) | 7.68 ( <i>d</i> , <i>J</i> = 7.3 Hz) | 8.07 ( <i>dt</i> , <i>J</i> = 1.9, 6.9 Hz), 8.06 ( <i>d</i> , <i>J</i> = 6.9 Hz), 7.51 ( <i>d</i> , <i>J</i> = 9.1 Hz), 7.00 ( <i>t</i> , <i>J</i> = 7.3 Hz), 3.94-3.84 ( <i>m</i> , 8H)              |
|  <p><b>2g</b></p>               | 9.05 ( <i>br. s</i> )              | 8.16-8.11 ( <i>m</i> )                   | 8.16-8.11 ( <i>m</i> )               | 8.74 ( <i>d</i> , <i>J</i> = 7.9 Hz) | 7.77 ( <i>t</i> , <i>J</i> = 7.6 Hz) | 7.73 ( <i>t</i> , <i>J</i> = 7.6 Hz) | 8.57 ( <i>d</i> , <i>J</i> = 7.6 Hz) | 9.67 ( <i>br. s</i> ), 8.25 ( <i>t</i> , <i>J</i> = 1.6 Hz), 7.90 ( <i>br. s</i> ) H <sub>2,5&amp;4</sub> Im, 13.43 (OH)                                                                              |
|  <p><b>2gH<sup>+</sup></b></p> | 9.06 ( <i>br. s</i> )              | 8.18-8.12 ( <i>m</i> )                   | 8.18-8.12 ( <i>m</i> )               | 8.75 ( <i>d</i> , <i>J</i> = 7.9 Hz) | 7.77 ( <i>t</i> , <i>J</i> = 7.6 Hz) | 7.74 ( <i>t</i> , <i>J</i> = 7.6 Hz) | 8.57 ( <i>d</i> , <i>J</i> = 7.6 Hz) | 9.83 ( <i>t</i> , <i>J</i> = 1.5 Hz), 8.30 ( <i>t</i> , <i>J</i> = 1.7 Hz), 7.98 ( <i>t</i> , <i>J</i> = 1.5 Hz) H <sub>2,5&amp;4</sub> Im, 13.43 (OH)                                                |
|  <p><b>2h</b></p>             | 8.72 ( <i>br. s</i> )              | 7.76 ( <i>s</i> )                        | 7.76 ( <i>s</i> )                    | 8.43 ( <i>d</i> , <i>J</i> = 7.6 Hz) | 7.57 ( <i>t</i> , <i>J</i> = 7.6 Hz) | 7.52 ( <i>t</i> , <i>J</i> = 7.4 Hz) | 8.73 ( <i>d</i> , <i>J</i> = 7.6 Hz) | 8.06 ( <i>dd</i> , <i>J</i> = 1.6, 4.4 Hz), 7.34 ( <i>br. t</i> , <i>J</i> = 7.6 Hz), 6.68 ( <i>d</i> , <i>J</i> = 8.2 Hz), 6.59 ( <i>dd</i> , <i>J</i> = 5.0, 6.9 Hz), 3.70-3.60 ( <i>m</i> , 8H)    |

|                                                                                                                                                                                                  |                                      |                                              |                                            |                                      |                                                 |                                                   |                                      |                                                                                                                                                                 |
|--------------------------------------------------------------------------------------------------------------------------------------------------------------------------------------------------|--------------------------------------|----------------------------------------------|--------------------------------------------|--------------------------------------|-------------------------------------------------|---------------------------------------------------|--------------------------------------|-----------------------------------------------------------------------------------------------------------------------------------------------------------------|
| <p>Chemical structure of 2hH<sup>+</sup>: A brominated indole ring system with a 4-pyridylpiperazine group at the 3-position and a hydroxylamine group at the 2-position.</p>                    | 8.77 ( <i>d</i> , <i>J</i> = 1.9 Hz) | 7.88 ( <i>d</i> , <i>J</i> = 8.8 Hz)         | 7.84 ( <i>dd</i> , <i>J</i> = 1.9, 8.8 Hz) | 8.51 ( <i>d</i> , <i>J</i> = 7.6 Hz) | 7.68 ( <i>dt</i> , <i>J</i> = 1.3, 7.6 Hz)      | 7.63 ( <i>t</i> , <i>J</i> = 7.3 Hz)              | 8.61                                 | 8.14-8.07 ( <i>m</i> , 2H), 7.53 ( <i>d</i> , <i>J</i> = 9.5 Hz), 7.02 ( <i>t</i> , <i>J</i> = 6.6 Hz), 3.95-3.74 ( <i>m</i> , 8H)                              |
| <p>Chemical structure of 7: A brominated indole ring system with a 4-pyridylpiperazine group at the 3-position and a carbonyl group at the 2-position. Protons are labeled 'a' and 'd'.</p>      | 9.15 ( <i>s</i> )                    | 8.48 ( <i>d</i> , <i>J</i> = 8.7 Hz)         | 8.85 ( <i>d</i> , <i>J</i> = 8.7 Hz)       | 8.66 ( <i>d</i> , <i>J</i> = 7.6 Hz) | 7.88 ( <i>m</i> )                               | 7.76 ( <i>t</i> , <i>J</i> = 7.2 Hz)              | 7.92 ( <i>d</i> , <i>J</i> = 7.2 Hz) |                                                                                                                                                                 |
| <p>Chemical structure of 8: A brominated indole ring system with a 4-pyridylpiperazine group at the 3-position and a hydroxylamine group at the 2-position. Protons are labeled 'a' and 'd'.</p> | 9.11 ( <i>br. s</i> )                | 8.33 ( <i>d</i> , <i>J</i> = 8.7 Hz)         | 8.82 ( <i>d</i> , <i>J</i> = 8.4 Hz)       | 8.65-8.70( <i>m</i> )                | 7.78-7.82 ( <i>m</i> , <i>J</i> = 6.4, 6.8, Hz) | 7.72-7.77 ( <i>m</i> , <i>J</i> = 6.8 Hz, 6.4 Hz) | 8.65 ( <i>d</i> , <i>J</i> = 6.4 Hz) | 13.82 ( <i>br. s</i> )                                                                                                                                          |
| <p>Chemical structure of 9: A brominated indole ring system with a 4-pyridylpiperazine group at the 3-position and a dimethylcarbamoyl group at the 2-position.</p>                              | 9.01 ( <i>d</i> , <i>J</i> = 1.9 Hz) | 8.27 ( <i>d</i> , <i>J</i> = 1.9 Hz, 9.1 Hz) | 8.73 ( <i>d</i> , <i>J</i> = 9.1 Hz)       | 8.61 ( <i>d</i> , <i>J</i> = 7.6 Hz) | 7.76 ( <i>t</i> , <i>J</i> = 7.6 Hz)            | 7.70 ( <i>d</i> , <i>J</i> = 7.6 Hz)              | 8.40 ( <i>d</i> , <i>J</i> = 7.6 Hz) | 3.22 ( <i>s</i> ); 3.07 ( <i>s</i> )                                                                                                                            |
| <p>Chemical structure of 13: A brominated indole ring system with a 4-pyridylpiperazine group at the 3-position and a pentyl ester group at the 2-position.</p>                                  | 9.18 ( <i>d</i> , <i>J</i> = 2 Hz)   | 8.38 ( <i>dd</i> , <i>J</i> = 2.0, 9.1 Hz)   | 8.86 ( <i>d</i> , <i>J</i> = 9.1 Hz)       | 8.68 ( <i>d</i> , <i>J</i> = 7.6 Hz) | 7.69-7.76 ( <i>m</i> )                          | 7.69-7.76 ( <i>m</i> )                            | 7.87 ( <i>m</i> )                    | 0.90 ( <i>t</i> , <i>J</i> = 7.1 Hz); 1.18-1.35 ( <i>m</i> ); 1.49 ( <i>quint</i> , <i>J</i> = 6.9 Hz); 2.04 ( <i>s</i> ); 2.39 ( <i>t</i> , <i>J</i> = 7.3 Hz) |



|                                                                                                                   |                                      |                                            |                                       |                                      |                                      |                                      |                                      |                                                                                          |
|-------------------------------------------------------------------------------------------------------------------|--------------------------------------|--------------------------------------------|---------------------------------------|--------------------------------------|--------------------------------------|--------------------------------------|--------------------------------------|------------------------------------------------------------------------------------------|
|  <p><b>15</b></p>                | 8.84 ( <i>d</i> )                    | 8.31 ( <i>d</i> , <i>J</i> = 9.1 Hz)       | 8.65 ( <i>d</i> , <i>J</i> = 9.1 Hz)  | 8.39 ( <i>d</i> , <i>J</i> = 7.6 Hz) | 7.77 ( <i>t</i> , <i>J</i> = 7.6 Hz) | 7.64 ( <i>t</i> , <i>J</i> = 7.2 Hz) | 7.78 ( <i>d</i> , <i>J</i> = 6.6 Hz) | 10.17 ( <i>s</i> , 1H) H9                                                                |
|  <p><b>17</b></p>                | 8.68 ( <i>d</i> , <i>J</i> = 2.1 Hz) | 8.08 ( <i>dd</i> , <i>J</i> = 2.1, 9.1 Hz) | 8.37 ( <i>d</i> , <i>J</i> = 9.1 Hz)  | 8.22 ( <i>d</i> , <i>J</i> = 7.6 Hz) | 7.65 ( <i>t</i> , <i>J</i> = 7.6 Hz) | 7.52 ( <i>t</i> , <i>J</i> = 7.3 Hz) | 7.64 ( <i>d</i> , <i>J</i> = 7.3 Hz) | 3.06 ( <i>s</i> , 3H)                                                                    |
|  <p><b>23</b></p>                | 8.76 ( <i>s</i> , 1H)                | 8.23 ( <i>d</i> , <i>J</i> = 9.1 Hz)       | 10.98 ( <i>d</i> , <i>J</i> = 9.1 Hz) | 8.39 ( <i>d</i> , <i>J</i> = 7.6 Hz) | 7.80 ( <i>t</i> , <i>J</i> = 7.6 Hz) | 7.67 ( <i>t</i> , <i>J</i> = 7.5 Hz) | 7.78 ( <i>d</i> , <i>J</i> = 6.6 Hz) | 14.93 ( <i>s</i> )                                                                       |
|  <p><b>25</b></p>               | 8.19 ( <i>d</i> , <i>J</i> = 1.9 Hz) | 7.57 ( <i>m</i> )                          | 6.68 ( <i>d</i> , <i>J</i> = 9.1 Hz)  | 7.87 ( <i>d</i> , <i>J</i> = 7.6 Hz) | 7.48 ( <i>m</i> )                    | 7.56 ( <i>t</i> , <i>J</i> = 7.6 Hz) | 7.73 ( <i>d</i> , <i>J</i> = 7.2 Hz) | 4.26 ( <i>t</i> , <i>J</i> = 10.2 Hz), 3.93 ( <i>t</i> , <i>J</i> = 10.2 Hz)             |
|  <p><b>25H<sup>+</sup></b></p> | 8.65 ( <i>s</i> )                    | 8.10 ( <i>d</i> , <i>J</i> = 9.1 Hz)       | 7.52 ( <i>d</i> , <i>J</i> = 9.1 Hz)  | 8.15 ( <i>d</i> , <i>J</i> = 7.6 Hz) | 7.76 ( <i>d</i> , <i>J</i> = 7.6 Hz) | 7.67 ( <i>t</i> , <i>J</i> = 7.4 Hz) | 7.83 ( <i>d</i> , <i>J</i> = 7.2 Hz) | 4.86 ( <i>dd</i> , <i>J</i> = 9.1, 10.6 Hz); 4.49 ( <i>dd</i> , <i>J</i> = 9.1, 10.6 Hz) |

|                                                                                                                  |                                         |                                            |                                      |                                      |                                            |                                      |                                      |                                                                                                                                                           |
|------------------------------------------------------------------------------------------------------------------|-----------------------------------------|--------------------------------------------|--------------------------------------|--------------------------------------|--------------------------------------------|--------------------------------------|--------------------------------------|-----------------------------------------------------------------------------------------------------------------------------------------------------------|
| 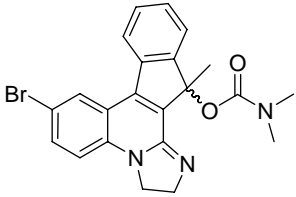 <p><b>27</b></p>               | 8.28<br>( <i>d</i> , <i>J</i> = 2.3 Hz) | 7.63 ( <i>dd</i> , <i>J</i> = 2.3, 8.7 Hz) | 6.94 ( <i>d</i> , <i>J</i> = 8.7 Hz) | 8.16 ( <i>d</i> , <i>J</i> = 7.6 Hz) | 7.48 ( <i>dt</i> , <i>J</i> = 1.1, 7.6 Hz) | 7.44 ( <i>t</i> , <i>J</i> = 7.2 Hz) | 7.55 ( <i>d</i> , <i>J</i> = 7.2 Hz) | 4.08-3.93 ( <i>m</i> , 4H),<br>2.95 & 2.59<br>(2x <i>br. s</i> , 2x3H),<br>1.73 ( <i>s</i> , 3H)                                                          |
|  <p><b>27H<sup>+</sup></b></p>  | 8.87<br>( <i>d</i> , <i>J</i> = 1.9 Hz) | 8.15 ( <i>dd</i> , <i>J</i> = 1.9, 8.8 Hz) | 7.76 ( <i>d</i> , <i>J</i> = 8.8 Hz) | 8.57 ( <i>d</i> , <i>J</i> = 7.6 Hz) | 7.67 ( <i>t</i> , <i>J</i> = 7.3 Hz)       | 7.63 ( <i>t</i> , <i>J</i> = 7.6 Hz) | 7.74 ( <i>d</i> , <i>J</i> = 7.3 Hz) | 4.90-4.77 ( <i>m</i> , 2H),<br>4.29-4.19 ( <i>m</i> , 2H),<br>3.05 & 2.63<br>(2x <i>br. s</i> , 2x3H),<br>1.84 ( <i>s</i> , 3H), 9.97<br>( <i>s</i> , 1H) |
|  <p><b>28</b></p>               | 8.46<br>( <i>d</i> , <i>J</i> = 2.2 Hz) | 7.76 ( <i>dd</i> , <i>J</i> = 2.2, 8.8 Hz) | 7.16 ( <i>d</i> , <i>J</i> = 8.8 Hz) | 8.31 ( <i>m</i> )                    | 7.55 ( <i>m</i> )                          | 7.55 ( <i>m</i> )                    | 8.00 ( <i>m</i> )                    | 4.38 ( <i>t</i> , <i>J</i> = 10.1 Hz, 2H), 4.10 ( <i>t</i> , <i>J</i> = 10.1 Hz, 2H),<br>15.58 ( <i>s</i> , OH)                                           |
|  <p><b>28H<sup>+</sup></b></p> | 8.74 ( <i>br. s</i> )                   | 8.11 ( <i>d</i> , <i>J</i> = 9.1 Hz)       | 7.73 ( <i>d</i> , <i>J</i> = 9.1 Hz) | 8.56 ( <i>m</i> )                    | 7.67 ( <i>t</i> , <i>J</i> = 7.3 Hz)       | 7.63 ( <i>t</i> , <i>J</i> = 7.6 Hz) | 8.45 ( <i>m</i> )                    | 4.78 ( <i>t</i> , <i>J</i> = 9.5 Hz, 2H), 4.20 ( <i>t</i> , <i>J</i> = 9.5 Hz, 2H),<br>9.23 ( <i>s</i> , OH)                                              |

Synthesis of compounds **2b**, **2d**, **2g**, **2h** and **2f** and their analytical data has been given in reference **14** of manuscript.

**2c** Unpublished result

<sup>¶</sup> We have used arbitrary systematic position numbering of protons for the sake of easier comparison within the same structural scaffold.

The IUPAC nomenclature of compounds is used throughout text in the Experimental section.

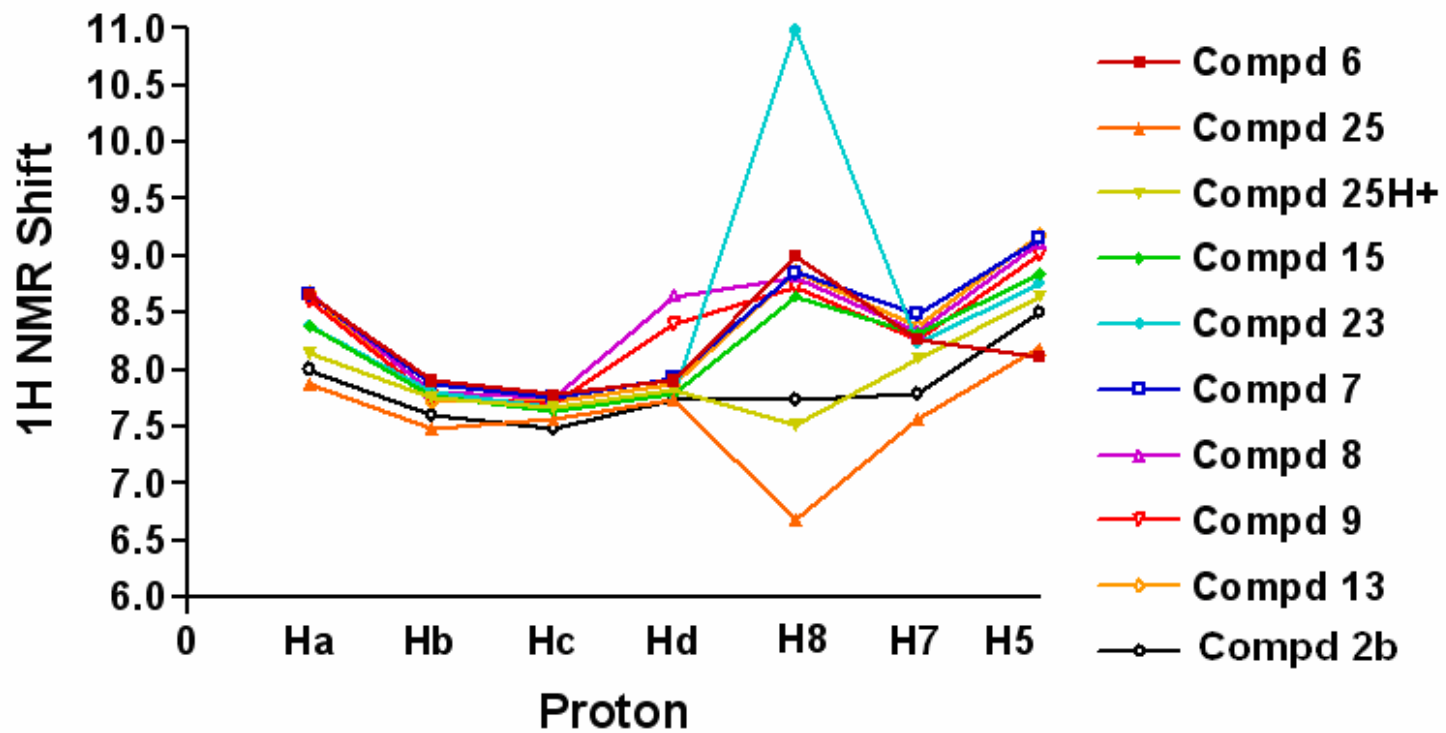

**Figure S1:** Plot of aromatic  $^1\text{H}$  Chemical shifts for various fused azoles. Maximum variation of proton shifts is observed for aromatic protons H8, Hd and H7 (shown in the square box).

**Computational details:** All geometry optimizations have been carried out using closed-shell Hartree-Fock method<sup>1</sup> and 6-31G(d,p) basis set<sup>2</sup> as it is implemented in Gaussian 03.<sup>3</sup> Then GIAO nuclear magnetic shielding tensors were calculated using the same method and basis set as the one employed during the geometry optimizations. Isotropic shielding part of the GIAO nuclear magnetic shielding tensors<sup>4</sup> have been employed to calculate proton NMR chemical shifts relative to TMS (see Table S3). The TMS reference signal for proton chemical shifts was found located at 32.3355 ppm. Chemical shifts have been calculated as follows:  $\delta$  (calc) = Isotropic Shielding(TMS) – Isotropic Shielding(proton).

## **1 *Ab initio* studies and comparison of theoretical proton chemical shifts with those of experimentals.**

### **1.1 *Thiol-thione tautomerism of compound 23***

Our energy calculations have shown that thione tautomeric form of compound **23** is more stable than thiol form by 16.95 kcal/mol. Calculated proton chemical shifts for both forms are found to be almost identical (see Table S2) with exceptions of proton associated with the tautomerization (proton in position **A**, Table S2) and proton interacting with the mercapto part of **23** (proton in position **8**, Table S2). Comparison of experimental and theoretical proton chemical shifts (see Table S2) suggests that thione form is indeed the only tautomeric form present in solution. Thus the calculated chemical shift of proton in position **8** (11.10 ppm) in the thione form is found to be within 0.12 ppm from the experimental value of 10.98 ppm while in thiol form the theoretical value is 8.39 ppm (2.59 ppm from the experimental  $\delta$ ). Calculated chemical shift of proton in position **A** in thione form is also much closer to experimental value than the one in thiol (9.54 ppm versus 5.58 ppm) but is still quite far from the experimental value of 14.93 ppm. This difference suggests that proton in position **A** is probably involved in interaction with solvent which is not taken into account in our theoretical calculations.

## 1.2 *Ab initio* simulation of proton chemical shifts

The assignment of experimental NMR spectra has been confirmed via *ab initio* simulations of proton chemical shifts (see Calculations details in computational part). A good agreement (standard error 0.37 ppm, Figure 2) between experimental and theoretical values has been obtained for the aromatic and aliphatic protons of all compounds (see Figure 2 as well as Table S3). However, the fast exchanging protons of hydroxyl groups in compounds **8**, **2g**, **2gH<sup>+</sup>** as well as proton in position **A** of compound **23** are not reproduced well missing the target 13 to 14 ppm chemical shift by almost 7 ppm (Table S3). Taking into account generally good reproducibility of experimental values by the computational technique employed (see Figure 2), such large deviation cannot be explained by deficiencies in technique *per se* and can probably be attributed to strong interactions of these protons with solvent which has not been taken into account in the gas phase calculations employed. Calculated chemical shifts of protons in position **d** of all compounds under investigation have also shown quite large 0.5-1.2 ppm deviation from the experimental values (see Table S3) which suggests presence of interactions unaccounted for by the theoretical model employed.

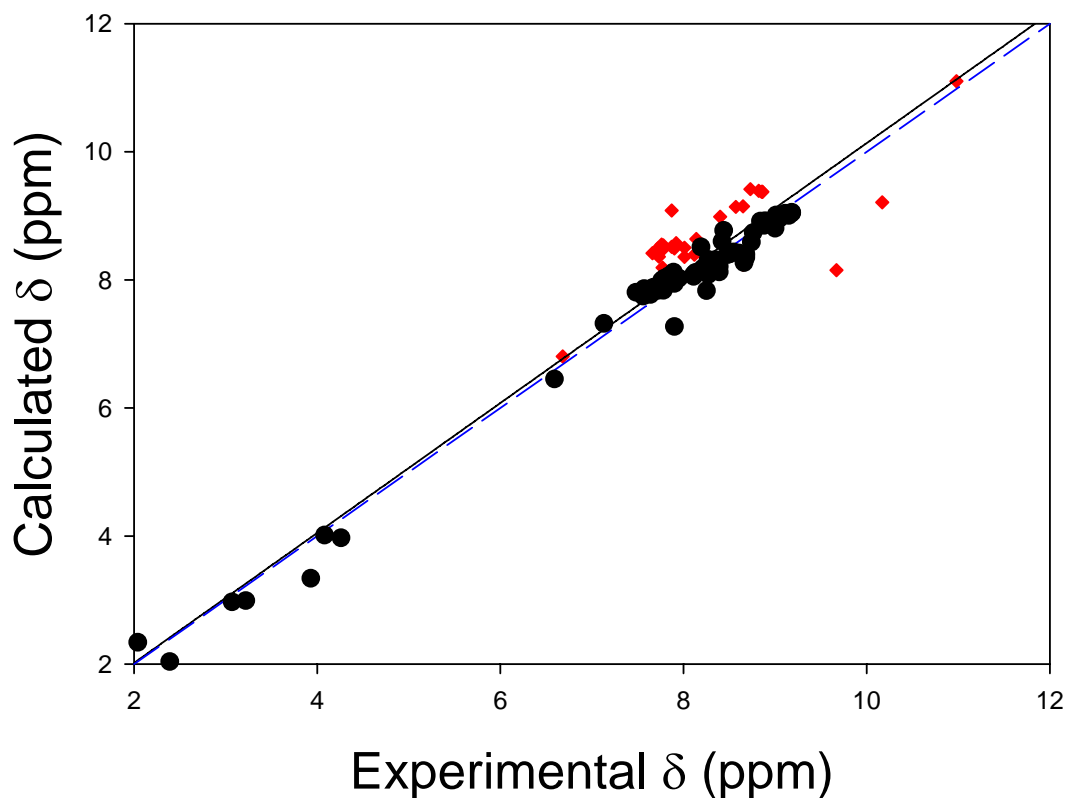

**Figure S2.** Comparison between theoretical and experimental proton chemical shifts of all protons (excluding hydroxyl protons of **8** and **2g** as well as proton in position **A** of compound **23**) in all compounds investigated (Table S3). Linear regression  $y = (1.0146 \pm 0.0179) x - (0.0120 \pm 0.1405)$ ,  $R = 0.982$ ,  $R^2 = 0.965$ , standard error of estimate = 0.37 ppm. Excluding from this statistics the aromatic protons in positions **8** and **d** as well as imidazole proton in position **A** of compound **2g** (red diamonds) significantly improves statistical parameters (linear regression  $y = (1.0121 \pm 0.0105) x - (-0.0940 \pm 0.0809)$ ,  $R = 0.995$ ,  $R^2 = 0.991$ , standard error of estimate = 0.21 ppm). The fact that these protons can spacially interact with C2-substituents in the series via solvent suggests a presence of additional interactions with the solvent which are not accounted for in the theoretical model employed. Blue dashed line represents ideal 1 to 1 correspondence between theoretical and experimental values.

**Table S2.** Hartree-Fock energy of thiol and thione tautomeric forms<sup>a,b,c</sup> of compound **23** as well as calculated (relative to TMS) and experimental chemical shifts<sup>b</sup> of aromatic protons (ppm) in compound **23**.

|                                                                                                             | HF energy<br>(a.u.) | $\delta(\text{H}_5)$            | $\delta(\text{H}_7)$            | $\delta(\text{H}_8)$              | $\delta(\text{H}_a)$            | $\delta(\text{H}_b)$            | $\delta(\text{H}_c)$            | $\delta(\text{H}_d)$            |
|-------------------------------------------------------------------------------------------------------------|---------------------|---------------------------------|---------------------------------|-----------------------------------|---------------------------------|---------------------------------|---------------------------------|---------------------------------|
| 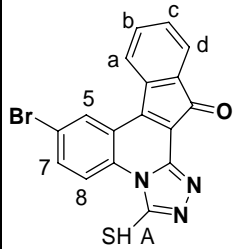 <p><b>23 (thiol)</b></p>  | -3854.02610644      | 8.76<br>(8.89)<br>$\Delta=0.13$ | 8.23<br>(8.21)<br>$\Delta=0.02$ | 10.98<br>(8.39)<br>$\Delta=2.59$  | 8.39<br>(8.12)<br>$\Delta=0.27$ | 7.80<br>(7.89)<br>$\Delta=0.09$ | 7.67<br>(7.77)<br>$\Delta=0.10$ | 7.78<br>(8.49)<br>$\Delta=0.71$ |
|  <p><b>23 (thione)</b></p> | -3854.05312372      | 8.76<br>(8.74)<br>$\Delta=0.02$ | 8.23<br>(8.20)<br>$\Delta=0.03$ | 10.98<br>(11.10)<br>$\Delta=0.12$ | 8.39<br>(8.21)<br>$\Delta=0.18$ | 7.80<br>(7.93)<br>$\Delta=0.13$ | 7.67<br>(7.83)<br>$\Delta=0.16$ | 7.78<br>(8.48)<br>$\Delta=0.70$ |

<sup>a</sup>The chemical shifts in parenthesis are from the *ab initio* calculations.

<sup>b</sup> $\Delta$  is a difference between experimental and calculated values (ppm).

<sup>c</sup> $\Delta E = -0.02701728$  a.u. = -16.95 kcal/mol, which means **23** (thione) is stabilized by 16.95 kcal/mol over **23** (thiol).

**Table S3:** Comparison between theoretical and experimental chemical shifts

| Sr. No. | Structure                                                                           | Proton position | $\delta$ (exp), ppm | $\delta$ (calc), ppm | $\Delta = \delta(\text{exp}) - \delta(\text{calc})$ , ppm |
|---------|-------------------------------------------------------------------------------------|-----------------|---------------------|----------------------|-----------------------------------------------------------|
| 6       | 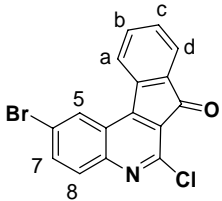   | 5               | 9.00                | 8.80                 | 0.20                                                      |
|         |                                                                                     | 7               | 8.27                | 8.08                 | 0.19                                                      |
|         |                                                                                     | 8               | 8.12                | 8.39                 | -0.27                                                     |
|         |                                                                                     | a               | 8.66                | 8.34                 | 0.32                                                      |
|         |                                                                                     | b               | 7.90                | 7.94                 | -0.04                                                     |
|         |                                                                                     | c               | 7.78                | 7.84                 | -0.06                                                     |
| 7       |    | 5               | 9.15                | 9.00                 | 0.15                                                      |
|         |                                                                                     | 7               | 8.48                | 8.39                 | 0.09                                                      |
|         |                                                                                     | 8               | 8.85                | 9.38                 | -0.53                                                     |
|         |                                                                                     | a               | 8.66                | 8.27                 | 0.39                                                      |
|         |                                                                                     | b               | 7.88                | 7.96                 | -0.08                                                     |
|         |                                                                                     | c               | 7.76                | 7.87                 | -0.11                                                     |
| 8       |    | 5               | 9.01                | 9.01                 | 0.00                                                      |
|         |                                                                                     | 7               | 8.33                | 8.28                 | 0.05                                                      |
|         |                                                                                     | 8               | 8.82                | 9.39                 | -0.57                                                     |
|         |                                                                                     | a               | 8.68                | 8.40                 | 0.28                                                      |
|         |                                                                                     | b               | 7.80                | 7.95                 | -0.15                                                     |
|         |                                                                                     | c               | 7.76                | 7.88                 | -0.12                                                     |
|         |                                                                                     | d               | 8.65                | 9.15                 | -0.50                                                     |
|         |                                                                                     | OH              | 13.82               | 7.09                 | 6.73                                                      |
| 9       |   | 5               | 9.01                | 9.01                 | 0.00                                                      |
|         |                                                                                     | 7               | 8.27                | 8.31                 | -0.04                                                     |
|         |                                                                                     | 8               | 8.73                | 9.42                 | -0.69                                                     |
|         |                                                                                     | a               | 8.61                | 8.42                 | 0.20                                                      |
|         |                                                                                     | b               | 7.76                | 7.99                 | -0.23                                                     |
|         |                                                                                     | c               | 7.70                | 7.84                 | -0.14                                                     |
|         |                                                                                     | d               | 8.40                | 8.99                 | -0.59                                                     |
|         |                                                                                     | A               | 3.07                | 2.97                 | 0.10                                                      |
| B       | 3.22                                                                                | 2.99            | 0.23                |                      |                                                           |
| 13      |  | 5               | 9.18                | 9.05                 | 0.13                                                      |
|         |                                                                                     | 7               | 8.38                | 8.29                 | 0.09                                                      |
|         |                                                                                     | 8               | 8.86                | 9.37                 | -0.51                                                     |
|         |                                                                                     | a               | 8.68                | 8.35                 | 0.33                                                      |
|         |                                                                                     | b               | 7.73                | 7.88                 | -0.16                                                     |
|         |                                                                                     | c               | 7.73                | 7.84                 | -0.12                                                     |
|         |                                                                                     | d               | 7.87                | 9.08                 | -1.21                                                     |
|         |                                                                                     | A               | 2.04                | 2.34                 | -0.30                                                     |
|         |                                                                                     | B               | 2.39                | 2.04                 | 0.35                                                      |
|         |                                                                                     | C               | 1.49                | 1.53                 | -0.04                                                     |
|         |                                                                                     | D               | 1.27 (1.18-1.35)    | 0.93                 | 0.33                                                      |
|         |                                                                                     | E               | 1.27 (1.18-1.35)    | 1.14                 | 0.12                                                      |
|         |                                                                                     | F               | 1.27 (1.18-1.35)    | 1.15                 | 0.12                                                      |
| G       | 0.90                                                                                | 0.95            | -0.05               |                      |                                                           |



|                                     |                                                                                     |           |           |           |             |
|-------------------------------------|-------------------------------------------------------------------------------------|-----------|-----------|-----------|-------------|
| 15                                  | 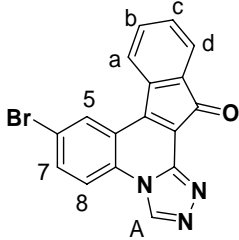   | 5         | 8.84      | 8.91      | -0.07       |
|                                     |                                                                                     | 7         | 8.31      | 8.21      | 0.10        |
|                                     |                                                                                     | 8         | 8.65      | 8.23      | 0.42        |
|                                     |                                                                                     | a         | 8.39      | 8.12      | 0.27        |
|                                     |                                                                                     | b         | 7.77      | 7.89      | -0.12       |
|                                     |                                                                                     | c         | 7.64      | 7.77      | -0.13       |
|                                     |                                                                                     | d         | 7.78      | 8.51      | -0.73       |
| A                                   | 10.17                                                                               | 9.21      | 0.96      |           |             |
| 23<br>(thiol form)                  |    | 5         | 8.76      | 8.89      | -0.13       |
|                                     |                                                                                     | 7         | 8.23      | 8.21      | 0.02        |
|                                     |                                                                                     | 8         | 10.98     | 8.39      | 2.59        |
|                                     |                                                                                     | a         | 8.39      | 8.12      | 0.27        |
|                                     |                                                                                     | b         | 7.80      | 7.89      | -0.09       |
|                                     |                                                                                     | c         | 7.67      | 7.77      | -0.10       |
|                                     |                                                                                     | d         | 7.78      | 8.49      | -0.71       |
| A                                   | 14.93                                                                               | 5.58      | 9.35      |           |             |
| 23<br>(thione form,<br>more stable) |    | 5         | 8.76      | 8.74      | 0.02        |
|                                     |                                                                                     | 7         | 8.23      | 8.20      | 0.03        |
|                                     |                                                                                     | 8         | 10.98     | 11.10     | -0.12       |
|                                     |                                                                                     | a         | 8.39      | 8.21      | 0.18        |
|                                     |                                                                                     | b         | 7.80      | 7.93      | -0.13       |
|                                     |                                                                                     | c         | 7.67      | 7.83      | -0.16       |
|                                     |                                                                                     | d         | 7.78      | 8.48      | -0.70       |
| A                                   | 14.93                                                                               | 9.536     | 5.39      |           |             |
| 25                                  |  | 5         | 8.17      | 8.51      | -0.34       |
|                                     |                                                                                     | 7         | 7.57      | 7.86      | -0.29       |
|                                     |                                                                                     | 8         | 6.68      | 6.80      | -0.12       |
|                                     |                                                                                     | a         | 7.89      | 8.05      | -0.16       |
|                                     |                                                                                     | b         | 7.57      | 7.80      | -0.23       |
|                                     |                                                                                     | c         | 7.46      | 7.75      | -0.29       |
|                                     |                                                                                     | d         | 7.73      | 8.36      | -0.63       |
| A                                   | 3.92                                                                                | 3.34      | 0.58      |           |             |
| B                                   | 4.25                                                                                | 3.97      | 0.28      |           |             |
| 25 H <sup>+</sup>                   |  | 5         | 8.65      | 9.25      | -0.60       |
|                                     |                                                                                     | 7         | 8.10      | 8.76      | -0.66       |
|                                     |                                                                                     | 8         | 7.52      | 7.57      | -0.05       |
|                                     |                                                                                     | a         | 8.15      | 8.62      | -0.47       |
|                                     |                                                                                     | b         | 7.76      | 8.36      | -0.60       |
|                                     |                                                                                     | c         | 7.67      | 8.43      | -0.76       |
|                                     |                                                                                     | d         | 7.83      | 8.82      | -0.99       |
| A                                   | 4.86                                                                                | 4.41      | 0.45      |           |             |
| B                                   | 4.49                                                                                | 4.21      | 0.28      |           |             |
| C                                   | -                                                                                   | 6.73      | -         |           |             |
| 2g                                  |  | 5         | 9.05      | 8.96/8.96 | 0.09/0.09   |
|                                     |                                                                                     | 7         | 8.11      | 8.05/8.04 | 0.06/0.07   |
|                                     |                                                                                     | 8         | 8.16      | 8.44/8.42 | -0.28/-0.26 |
|                                     |                                                                                     | a         | 8.74      | 8.59/8.59 | 0.15/0.15   |
|                                     |                                                                                     | b         | 7.77      | 8.00/8.00 | -0.23/-0.23 |
|                                     |                                                                                     | c         | 7.73      | 7.89/7.90 | -0.16/-0.17 |
|                                     |                                                                                     | d         | 8.57      | 9.14/9.15 | -0.57/-0.58 |
| A                                   | 9.67                                                                                | 8.45/8.15 | 1.22/1.52 |           |             |

|              |      |           |       |           |           |      |       |
|--------------|------|-----------|-------|-----------|-----------|------|-------|
|              |      | B         | 8.25  | 7.50/7.83 | 0.75/0.42 |      |       |
|              |      | C         | 7.90  | 7.23/7.27 | 0.67/0.63 |      |       |
|              |      | OH        | 13.43 | 6.44/6.48 | 6.99/6.95 |      |       |
| <b>2g H+</b> |      | 5         | 9.06  | 9.25      | -0.19     |      |       |
|              |      | 7         | 8.15  | 8.50      | -0.35     |      |       |
|              |      | 8         | 8.15  | 8.47      | -0.32     |      |       |
|              |      | a         | 8.75  | 8.83      | -0.08     |      |       |
|              |      | b         | 7.77  | 8.36      | -0.59     |      |       |
|              |      | c         | 7.74  | 8.29      | -0.55     |      |       |
|              |      | d         | 8.57  | 9.28      | -0.71     |      |       |
|              |      | A         | 7.98  | 8.41      | -0.43     |      |       |
|              |      | B         | 9.83  | 9.34      | 0.49      |      |       |
|              |      | C         | 8.30  | 9.16      | -0.86     |      |       |
|              |      | D         | 13.43 | 6.46      | 6.97      |      |       |
|              |      | <b>2b</b> |       | 5         | 8.66      | 8.76 | -0.10 |
|              |      |           |       | 7         | 7.95      | 8.02 | -0.07 |
| 8            | 7.77 |           |       | 8.19      | -0.42     |      |       |
| a            | 8.34 |           |       | 8.31      | 0.03      |      |       |
| b            | 7.70 |           |       | 7.89      | -0.19     |      |       |
| c            | 7.58 |           |       | 7.79      | -0.21     |      |       |
| d            | 7.66 |           |       | 8.42      | -0.76     |      |       |
| A            | 4.08 |           |       | 4.01      | 0.07      |      |       |
| <b>2d</b>    |      |           |       | 5         | 8.90      | 8.87 | 0.03  |
|              |      |           |       | 7         | 8.13      | 8.11 | 0.02  |
|              |      | 8         | 8.01  | 8.36      | -0.35     |      |       |
|              |      | a         | 8.55  | 8.43      | 0.12      |      |       |
|              |      | b         | 7.80  | 8.00      | -0.20     |      |       |
|              |      | c         | 7.67  | 7.88      | -0.21     |      |       |
|              |      | d         | 7.78  | 8.54      | -0.76     |      |       |
|              |      | A         | 8.44  | 8.77      | -0.33     |      |       |
|              |      | B         | 7.89  | 8.12      | -0.23     |      |       |
|              |      | C         | 7.13  | 7.32      | -0.19     |      |       |
| <b>2e</b>    |      | 5         | 8.90  | 8.87      | 0.03      |      |       |
|              |      | 7         | 8.13  | 8.11      | 0.02      |      |       |
|              |      | 8         | 8.01  | 8.36      | -0.35     |      |       |
|              |      | a         | 8.55  | 8.43      | 0.12      |      |       |
|              |      | b         | 7.80  | 8.00      | -0.20     |      |       |
|              |      | c         | 7.67  | 7.88      | -0.21     |      |       |
|              |      | d         | 7.78  | 8.54      | -0.76     |      |       |
|              |      | A         | 7.84  | 8.06      | -0.22     |      |       |
|              |      | B         | 8.42  | 8.60      | -0.18     |      |       |
|              |      | C         | 6.59  | 6.45      | 0.14      |      |       |
| <b>2c</b>    |      | 5         | 8.89  | 8.92      | -0.03     |      |       |
|              |      | 7         | 8.20  | 8.16      | 0.04      |      |       |
|              |      | 8         | 8.14  | 8.64      | -0.50     |      |       |
|              |      | a         | 8.51  | 8.41      | 0.10      |      |       |
|              |      | b         | 7.78  | 7.99      | -0.21     |      |       |
|              |      | c         | 7.66  | 7.87      | -0.21     |      |       |
|              |      | d         | 7.76  | 8.55      | -0.79     |      |       |

**Table S4.** Coordinates, charge, multiplicity, Hartree-Fock energy and dipole moment of *ab initio* optimized geometries (HF/6-31G\*\*, Gaussian 03).

**Compound 6**

Charge = 0 Multiplicity = 1  
C,0,2.8321931156,-0.3539189876,0.0001501645  
C,0,2.9056053728,-1.7657535663,0.0012153337  
C,0,1.7614997579,-2.4922835998,0.0015944185  
C,0,0.4953369331,-1.8527663348,0.0010105859  
C,0,0.4307432081,-0.4434296756,0.0001151986  
C,0,1.6441732963,0.2951614289,-0.0003822407  
C,0,-0.8735941104,0.1178225207,-0.0002080945  
C,0,-1.9618938651,-0.7197704298,-0.0006451507  
C,0,-1.7597109082,-2.115926438,-0.0003887429  
N,0,-0.5957282278,-2.6535667933,0.000816634  
C,0,-1.3550495041,1.5370077913,0.0001312069  
C,0,-2.7492440943,1.5090408507,-0.0005111458  
C,0,-3.2211478661,0.092397202,-0.0010721999  
O,0,-4.3488120441,-0.2777590361,-0.001558295  
Cl,0,-3.1157194747,-3.1907555048,0.0000072416  
C,0,-0.7054317893,2.7548467321,0.0013695015  
C,0,-2.8537753288,3.8765813488,0.0006192099  
C,0,-3.5119932421,2.6500293798,-0.0002921291  
H,0,1.777963683,-3.5654690114,0.0023117374  
H,0,-3.4177256151,4.7916527318,0.0007340403  
H,0,-4.5846367036,2.584829923,-0.0008161826  
Br,0,4.4465412433,0.6383757844,-0.0007433574  
H,0,3.8651940481,-2.2461841863,0.0016581501  
H,0,1.6341203189,1.3625673132,-0.0014550378  
H,0,0.3613349522,2.8444797842,0.0024307023  
C,0,-1.4719923372,3.9198258183,0.0015077274  
H,0,-0.9716810099,4.8716701691,0.002499054

HF=-3768.686413  
RMSD=6.219e-009  
Dipole =1.0156339,1.6672115,0.0008983  
PG=C01 [X(C16H7Br1Cl1N1O1)]

**Compound 7**

Charge = 0 Multiplicity = 1  
C,0,-2.7546423812,-0.211321651,0.0301817128  
C,0,-2.8608595116,-1.6013872744,0.0045938737  
C,0,-1.7244253663,-2.3669670465,-0.0243731759  
C,0,-0.4790968458,-1.7417665378,-0.027751935  
C,0,-0.3510963872,-0.3457086034,-0.0023178356  
C,0,-1.534716591,0.407920594,0.0269862453  
C,0,0.9914188179,0.2221703118,-0.0080475764  
C,0,2.0806958966,-0.579992122,-0.0371896005  
C,0,1.9320981158,-2.0009533558,-0.0628024104  
N,0,0.6836766345,-2.4919802425,-0.0567459169  
C,0,1.4510556106,1.6542933034,0.0140273104  
C,0,2.8483953621,1.646712965,-0.0036707184  
C,0,3.3331874557,0.2347426361,-0.0371300736  
O,0,4.4557628738,-0.1449517814,-0.0584983975

N,0,2.7594395824,-3.0051799111,-0.0924304918  
C,0,0.788683952,2.8623856056,0.0458835204  
C,0,2.920999511,4.01559428,0.0415186265  
C,0,3.5949507302,2.7953502971,0.0093133967  
H,0,-1.7761707248,-3.4378319267,-0.044458224  
H,0,3.4738316749,4.9372718473,0.0524973491  
H,0,4.6683306056,2.7441040382,-0.0051681794  
Br,0,-4.3300456313,0.8374457994,0.0700545265  
H,0,-3.8275490205,-2.0669758121,0.007604584  
H,0,-1.5007450866,1.4737154276,0.047185071  
H,0,-0.2782735774,2.9446630267,0.0608823728  
C,0,1.5416197065,4.039420711,0.0593249412  
H,0,1.0272772793,4.9834250821,0.0841704199  
N,0,0.7690182894,-3.8247037347,-0.0835657969  
N,0,1.9948918514,-4.0941825534,-0.1041024299

HF=-3472.4876487

RMSD=4.911e-009

Dipole=-2.0009017,2.5810999,0.0749247

PG=C01 [X(C16H7Br1N4O1)]

## Compound 8

Charge = 0 Multiplicity = 1

C,0,-3.0030838179,-0.2478445663,0.039511649  
C,0,-3.1048994734,-1.6370444626,0.013903926  
C,0,-1.9624294829,-2.3938401885,-0.017766694  
C,0,-0.7218625018,-1.7602797899,-0.0237401007  
C,0,-0.5976756806,-0.3650713535,0.0016933905  
C,0,-1.7864435263,0.3795506425,0.033784192  
C,0,0.7446560631,0.2093235518,-0.0069287041  
C,0,1.8385802222,-0.5870496283,-0.0387831751  
C,0,1.6922544754,-2.010561627,-0.0644389952  
N,0,0.4465868622,-2.5053367491,-0.0556049822  
C,0,1.2070264541,1.6288575735,0.0141484161  
C,0,2.61217113,1.6308512131,-0.0066823921  
C,0,3.0685563212,0.2229486386,-0.0411481553  
N,0,4.2064840429,-0.3091058692,-0.0685939816  
N,0,2.5226588864,-3.0141963739,-0.0963613958  
C,0,0.5270089849,2.8314892037,0.0479803934  
C,0,2.6327203632,4.0112996104,0.0399791371  
C,0,3.3296854104,2.8086252511,0.0058904601  
H,0,-2.0064905153,-3.4651035957,-0.0380422504  
H,0,3.1740756385,4.9400972884,0.0502838072  
H,0,4.399943413,2.7957432071,-0.0102531321  
Br,0,-4.5838250993,0.7950194802,0.0832039243  
H,0,-4.0689086111,-2.1079069096,0.0189576972  
H,0,-1.7616264875,1.4452750832,0.0542010492  
H,0,-0.5411465359,2.8903377826,0.0649885729  
C,0,1.2516942126,4.0188182636,0.0606434721  
H,0,0.7225076976,4.9545905562,0.0869798023  
N,0,0.5350581935,-3.8366149803,-0.0828077573  
N,0,1.7618773849,-4.104338331,-0.1063463177  
O,0,5.2292307072,0.578291381,-0.0663820545  
H,0,6.0052657043,0.0416658648,-0.0884763341

HF=-3527.4606282  
RMSD=5.653e-009  
Dipole=-0.5696856,2.1381979,0.0503419  
PG=C01 [X(C16H8Br1N5O1)]

### Compound 9

Charge = 0 Multiplicity = 1  
C,0,-4.2900581858,-0.2404878818,0.074473012  
C,0,-4.425679385,-1.6222083728,0.1918538627  
C,0,-3.3023941946,-2.4050655225,0.2545006973  
C,0,-2.0462340782,-1.8049680374,0.2005163769  
C,0,-1.8881067556,-0.4179969584,0.0846663328  
C,0,-3.0582542492,0.3538522397,0.0213776593  
C,0,-0.5312734318,0.11881887,0.0341087966  
C,0,0.5425024942,-0.7024483081,0.0832400182  
C,0,0.3620700062,-2.1174058281,0.2124420101  
N,0,-0.8973113525,-2.5762135132,0.2624320702  
C,0,-0.0358235802,1.5242827921,-0.069990371  
C,0,1.3691532245,1.494339749,-0.0800315665  
C,0,1.7937645691,0.0754943208,0.0074620921  
N,0,2.9108728117,-0.4988394312,0.0102523807  
N,0,1.1651255344,-3.1369904773,0.3121626037  
C,0,-0.6902210279,2.7377465843,-0.150082508  
C,0,1.4377526889,3.8695056603,-0.2596295486  
C,0,2.1083989043,2.6536483712,-0.1773861106  
H,0,-3.3725748085,-3.4713334727,0.3439379408  
H,0,1.9991753749,4.7831074814,-0.3357057927  
H,0,3.1776134009,2.6221472614,-0.1922872057  
Br,0,-5.8445142075,0.8380571327,-0.0144525385  
H,0,-5.401099525,-2.0672259122,0.231658655  
H,0,-3.0083968447,1.4146658776,-0.0714590785  
H,0,-1.7566239338,2.819596228,-0.1433329164  
C,0,0.0583558644,3.9072765297,-0.2437671077  
H,0,-0.4519235363,4.8517015114,-0.3060802095  
N,0,-0.8434355478,-3.9027929914,0.3931635932  
N,0,0.3762309392,-4.2015002406,0.4194230113  
O,0,3.9544087868,0.3837830081,0.0031404877  
C,0,5.1127268632,-0.1573723108,-0.4645275142  
N,0,6.1760545179,0.5630052991,-0.0495295807  
C,0,6.1074543437,1.6921047241,0.8558116757  
C,0,7.4801552637,0.2577648882,-0.6049186629  
O,0,5.1428843575,-1.10956004,-1.1700014354  
H,0,5.2137945615,1.6530061033,1.4559837599  
H,0,6.1330353127,2.637019224,0.3173714385  
H,0,6.9648898219,1.659633806,1.518234131  
H,0,7.8743592576,1.1189955483,-1.1375257167  
H,0,7.3956185011,-0.5726945877,-1.2850431586  
H,0,8.1732902018,-0.0023720306,0.1889311681

HF=-3773.3083721  
RMSD=5.117e-009  
Dipole=-0.5776884,3.4349931,0.4627808  
PG=C01 [X(C19H13Br1N6O2)]

## Compound 13

### Isomer 1

Charge = 0 Multiplicity = 1

C,0,-4.7836692929,-0.1983297716,-1.2972301773  
C,0,-4.7783617447,-1.5486436696,-1.6389824322  
C,0,-3.7068064421,-2.3268873696,-1.2847974938  
C,0,-2.6450196932,-1.7529481699,-0.5897175321  
C,0,-2.6318024978,-0.3977241886,-0.2341455916  
C,0,-3.742291582,0.3702158937,-0.6134680207  
C,0,-1.4719854482,0.1192300392,0.4932905347  
C,0,-0.4470764674,-0.6910273413,0.8168462336  
C,0,-0.4791757038,-2.0691349684,0.4438399595  
N,0,-1.5491971919,-2.5188267155,-0.2218510501  
C,0,-1.148704238,1.4857426868,0.9945286615  
C,0,0.1110445558,1.4331187731,1.6032761846  
C,0,0.6657833003,0.0137554173,1.5597669534  
O,0,1.8020581936,-0.1269596787,0.6996843055  
N,0,0.3375638536,-3.0713755098,0.6165164433  
C,0,-1.8473015287,2.6802272536,0.9635063308  
C,0,-0.0361581045,3.7512417486,2.1372339364  
C,0,0.6678460444,2.5527862932,2.1816188815  
H,0,-3.6712732551,-3.3694393009,-1.5338247969  
H,0,0.389169366,4.634893834,2.5783067762  
H,0,1.6318873273,2.5016920671,2.6477189165  
Br,0,-6.264841319,0.8746424309,-1.7903545638  
H,0,-5.6052544374,-1.973202983,-2.1747510986  
H,0,-3.7922824722,1.4087931495,-0.3768049797  
H,0,-2.8165681192,2.7691028247,0.5184555922  
C,0,-1.2782803919,3.8112667032,1.5352134524  
H,0,-1.8178388297,4.7411928093,1.5099618624  
N,0,-1.3685747364,-3.8212844508,-0.4563265655  
N,0,-0.2560403437,-4.1156745186,0.0466868195  
C,0,3.0211470984,0.2992738717,1.0115230075  
C,0,4.0057754279,-0.1037524983,-0.0579874158  
C,0,5.4318102068,0.3579877229,0.2238980838  
O,0,3.288494492,0.9131230788,1.9942081313  
C,0,6.4057206014,-0.0665594549,-0.8759832066  
C,0,0.9010119826,-0.6030283299,2.9399027346  
H,0,3.6392878822,0.2955769285,-1.0000270376  
H,0,3.9487442495,-1.1847256093,-0.1525033418  
H,0,5.7557826756,-0.044384614,1.1790808104  
H,0,5.4444531554,1.4387114158,0.3312935625  
H,0,6.0730812691,0.3378469729,-1.8312656963  
H,0,6.384155112,-1.1504512088,-0.9807221614  
C,0,7.8417218544,0.3862673548,-0.6091761877  
C,0,8.8222871372,-0.0344259567,-1.7047861579  
C,0,10.2550289681,0.4206785964,-1.4320627519  
H,0,-0.0361765702,-0.6141890939,3.4849890081  
H,0,1.6261446594,-0.035390211,3.5018042084  
H,0,1.2504888553,-1.6222785801,2.8287497385  
H,0,8.1747743384,-0.0182803643,0.345533202  
H,0,7.863748316,1.4701434686,-0.5042296448  
H,0,8.4908071786,0.3702181911,-2.6593211099  
H,0,8.8016420427,-1.1175370966,-1.8096122091  
H,0,10.6282223324,0.0040492924,-0.5005464626  
H,0,10.3151720807,1.5029655525,-1.3563811186

H,0,10.9253322018,0.1070448238,-2.226461231

HF=-3859.6739138

RMSD=4.372e-009

Dipole=-0.8192255,1.5281333,-0.307326

PG=C01 [X(C24H23Br1N4O2)]

## Isomer 2

Charge = 0 Multiplicity = 1

C,0,-4.6382289576,-0.2509237662,1.7405099546  
C,0,-4.5806776669,-1.597053397,2.0938183707  
C,0,-3.5352131721,-2.3641150571,1.6489125252  
C,0,-2.5516514703,-1.7832284095,0.8519597828  
C,0,-2.5921005562,-0.4320932957,0.4831641557  
C,0,-3.673856317,0.3244054358,0.9567974804  
C,0,-1.5131310212,0.0928114306,-0.3546003835  
C,0,-0.5108576827,-0.7065945807,-0.7645272799  
C,0,-0.4872537903,-2.0806765468,-0.3763760929  
N,0,-1.4835286054,-2.5377504536,0.3909576103  
C,0,-1.2586454122,1.4579814631,-0.8973843603  
C,0,-0.060645008,1.4161325477,-1.6208614286  
C,0,0.5169378234,0.0052890965,-1.6153542342  
N,0,0.3248099372,-3.0732556677,-0.6145446405  
C,0,-1.9690095266,2.6428678869,-0.8128303031  
C,0,-0.2917409035,3.7258391197,-2.1615133124  
C,0,0.4228667288,2.5368807089,-2.2598031873  
H,0,-3.4608984855,-3.4031587853,1.9039698715  
H,0,0.0772552807,4.6103311631,-2.6491646399  
H,0,1.3397828393,2.4940124677,-2.8135766787  
Br,0,-6.0830141466,0.8065952547,2.3590110259  
H,0,-5.3475035671,-2.0270865419,2.7087163399  
H,0,-3.7613913948,1.3593963815,0.7153599105  
H,0,-2.8936119644,2.7232643628,-0.279814749  
C,0,-1.4728726812,3.7752701628,-1.4464416445  
H,0,-2.021545763,4.6977953569,-1.3798967891  
N,0,-1.2622145592,-3.8347664556,0.6206122523  
N,0,-0.1971767467,-4.119204689,0.0187306256  
O,0,1.7306526426,-0.1096868688,-0.8639956638  
C,0,2.9086816178,0.3302035973,-1.2926445371  
C,0,3.9947596225,-0.0465609953,-0.3157837456  
C,0,5.381159382,0.4318815094,-0.7344110771  
O,0,3.0739031742,0.9365268045,-2.3021254396  
C,0,6.459680719,0.0338724856,0.2739845298  
H,0,3.9630942166,-1.127058871,-0.2052913233  
H,0,3.7118001993,0.3584739983,0.6522572819  
H,0,5.3674096109,1.5113529722,-0.8535921751  
H,0,5.6206653346,0.0230162611,-1.7114968472  
H,0,6.4643282251,-1.048926046,0.391377815  
H,0,6.2115118617,0.4446328132,1.251964606  
C,0,7.8575474933,0.5037238105,-0.130422265  
C,0,0.6315246039,-0.6237878211,-3.0051877443  
C,0,8.94222664,0.1096008324,0.8730662238  
C,0,10.3362846731,0.5815233021,0.4630110199  
H,0,7.8533368786,1.5865121694,-0.2480523342  
H,0,8.1061905356,0.0928490328,-1.1078730176  
H,0,1.2924470141,-0.0524638366,-3.638071058  
H,0,-0.3521671985,-0.6542217507,-3.4601616566

H,0,1.0050952997,-1.6367064075,-2.9169934366  
H,0,8.9477360287,-0.9723976644,0.9905079445  
H,0,8.6951644377,0.52066387,1.8501741551  
H,0,10.3728012235,1.6635839997,0.3708147954  
H,0,10.6272322165,0.1592575517,-0.4949112159  
H,0,11.0823747572,0.286667846,1.1945505045

HF=-3859.6739138  
RMSD=4.372e-009  
Dipole=-0.8103326,1.5200273,0.367354  
PG=C01 [X(C24H23Br1N4O2)]

### **Compound 15**

Charge = 0 Multiplicity = 1  
C,0,-2.7653725384,-0.1913512223,0.0306524043  
C,0,-2.8847954436,-1.5749886312,0.0061271348  
C,0,-1.7509931619,-2.3493242168,-0.0223779792  
C,0,-0.4922263176,-1.7529429206,-0.026673808  
C,0,-0.3602275773,-0.3549183459,-0.0021263831  
C,0,-1.5331443069,0.4086651479,0.0267040331  
C,0,0.9850780934,0.2143751165,-0.0081275274  
C,0,2.0679669698,-0.5883729145,-0.0363346947  
C,0,1.9338023199,-2.0157230364,-0.061164209  
N,0,0.661935164,-2.5272331836,-0.0552965419  
C,0,1.4419010495,1.6484964783,0.0126804329  
C,0,2.8391836808,1.6407798075,-0.0047566975  
C,0,3.3222483424,0.2280455199,-0.0368229147  
O,0,4.4462122639,-0.1473567829,-0.0577436858  
N,0,2.8043095252,-2.964880784,-0.0892996474  
C,0,0.7828285437,2.8584554347,0.0431152329  
C,0,2.9166734985,4.0099957989,0.0380014218  
C,0,3.5876162189,2.7877305642,0.0071493973  
H,0,-1.8445431115,-3.4177534271,-0.0412845452  
H,0,3.4711019265,4.9307773255,0.0481333267  
H,0,4.6609282792,2.7335812333,-0.0071395432  
Br,0,-4.3257531648,0.880312453,0.0700790553  
H,0,-3.8542531117,-2.0348922844,0.0094310253  
H,0,-1.4844687465,1.4737114006,0.0461642974  
H,0,-0.2837992674,2.9450143608,0.0578105195  
C,0,1.5378647682,4.0348503692,0.0554899483  
H,0,1.0241631455,4.9793912328,0.0792487941  
C,0,0.8651662092,-3.8782340908,-0.0825942078  
N,0,2.1188958285,-4.1347881536,-0.1025765348  
H,0,0.0851278258,-4.6068297362,-0.0866217606

HF=-3456.5228163  
RMSD=4.870e-009  
Dipole=-2.5890061,1.6114949,0.0613891  
PG=C01 [X(C17H8Br1N3O1)]

### **Compound 23**

**Thiol form**



Charge = 0 Multiplicity = 1  
C,0,-2.7498096995,0.267081408,0.0361160337  
C,0,-2.8816811233,-1.1111117979,0.0133987089  
C,0,-1.7558631393,-1.9009119132,-0.0133896668  
C,0,-0.4847849435,-1.3327509049,-0.0179654057  
C,0,-0.3460975507,0.069618392,0.0051641851  
C,0,-1.5075233328,0.8465276964,0.0321041314  
C,0,0.9934166715,0.650164468,0.0001198368  
C,0,2.0754022719,-0.1480630522,-0.0263684117  
C,0,1.9485233744,-1.5737861579,-0.0500996283  
N,0,0.6776375298,-2.1165952941,-0.0451316344  
C,0,1.4460085766,2.0867040472,0.0204040666  
C,0,2.8436491711,2.0804690057,0.0043110919  
C,0,3.3296422048,0.6690478981,-0.0262251133  
O,0,4.4543847334,0.2962207115,-0.0456644234  
N,0,2.8425527789,-2.4926615677,-0.0765575974  
C,0,0.7877130897,3.2973690329,0.0494071903  
C,0,2.9215128597,4.4496312157,0.0453823015  
C,0,3.5921590546,3.2272495503,0.0160546029  
H,0,-1.8877547805,-2.96081568,-0.0305224889  
H,0,3.4758225921,5.3704832184,0.0553451979  
H,0,4.6654582977,3.1725657609,0.0028088293  
Br,0,-4.2932772267,1.3612814405,0.0729927644  
H,0,-3.8538638697,-1.5650360322,0.0165571671  
H,0,-1.4409807643,1.9100227236,0.0500262008  
H,0,-0.2785260154,3.386532592,0.0632325342  
C,0,1.5428837301,4.4738201958,0.0616041791  
H,0,1.0286159757,5.41807893,0.0842330039  
C,0,0.9305427419,-3.466970909,-0.0718733108  
N,0,2.1935305008,-3.6805347653,-0.0901123973  
S,0,-0.2427893503,-4.7816596008,-0.0817362175  
H,0,0.6952738285,-5.7158816674,-0.1095896778

HF=-3854.0261064

RMSD=4.565e-009

Dipole=-2.1563163,1.403344,0.0493519

PG=C01 [X(C17H8Br1N3O1S1)]

## Thione form

Charge = 0 Multiplicity = 1  
C,0,-2.7599825159,0.2489170144,0.0212177502  
C,0,-2.8872638383,-1.1278969522,0.0056421774  
C,0,-1.7611271928,-1.9220099825,-0.0113492481  
C,0,-0.4951832908,-1.3477860193,-0.0129331286  
C,0,-0.3589314576,0.0555607929,0.0030323265  
C,0,-1.5180946899,0.8322589967,0.0199681676  
C,0,0.9782405443,0.6448963799,0.0013090502  
C,0,2.066387779,-0.1432822039,-0.0156294497  
C,0,1.9469248742,-1.5703571897,-0.0321980209  
N,0,0.6767039797,-2.1356867728,-0.0303096612  
C,0,1.4255620399,2.0839361192,0.0160401378  
C,0,2.8236251265,2.0835483419,0.0066464989  
C,0,3.3154288434,0.674337715,-0.0139465585  
O,0,4.4410595554,0.3010550967,-0.0260336683  
N,0,2.8616715943,-2.4563729806,-0.0492746639  
C,0,0.7608819731,3.2910644968,0.0354503466  
C,0,2.8894691318,4.452501629,0.0354208584

C,0,3.5669251673,3.2335749198,0.0158298043  
H,0,-1.8632618879,-2.9847035041,-0.023388752  
H,0,3.4392915031,5.3760139375,0.0431080066  
H,0,4.6404914325,3.1847632421,0.0080249313  
Br,0,-4.3036843215,1.3434858478,0.0444718908  
H,0,-3.8583956752,-1.5842785354,0.006650573  
H,0,-1.4538120604,1.8956901111,0.0321835518  
H,0,-0.3055290807,3.3749822221,0.043747794  
C,0,1.5106789103,4.4709416619,0.0449567804  
H,0,0.9922046471,5.4128721505,0.0600966023  
C,0,0.857107404,-3.5029925987,-0.0481935693  
N,0,2.1771997547,-3.6205945023,-0.0587287332  
S,0,-0.2073480588,-4.8043037648,-0.0565999901  
H,0,2.6541347197,-4.49162377,-0.0724618263

HF=-3854.0531237

RMSD=8.709e-009

Dipole=-0.3412225,2.4638613,0.0323475

PG=C01 [X(C17H8Br1N3O1S1)]

## Compound 25

Charge = 0 Multiplicity = 1

C,0,-2.7882386501,-0.1234294834,0.0349727118  
C,0,-2.9010909136,-1.504944916,0.0111520027  
C,0,-1.7689392851,-2.2848937345,-0.0181981483  
C,0,-0.4993277426,-1.6979336474,-0.0243760224  
C,0,-0.3841875537,-0.2905262128,-0.0002489829  
C,0,-1.5512520512,0.4725378809,0.0293689448  
C,0,0.9650923942,0.2657562216,-0.0081107194  
C,0,2.0468878673,-0.5391539176,-0.036908009  
C,0,1.9305103753,-1.9836968681,-0.0616252466  
N,0,0.6260029492,-2.4693389837,-0.0533185681  
C,0,1.4236614644,1.7002726142,0.0116836681  
C,0,2.8193012813,1.6896011668,-0.006767483  
C,0,3.2984580884,0.2730316134,-0.0386183084  
O,0,4.4279412744,-0.0899923399,-0.0599358478  
N,0,2.8440234613,-2.8476679109,-0.0894543909  
C,0,0.7653688927,2.9113513851,0.0419203171  
C,0,2.9006662222,4.0581352013,0.0346449402  
C,0,3.5699239873,2.8352454786,0.0039633858  
H,0,-1.8668875792,-3.3526641864,-0.036395101  
H,0,3.4565733326,4.978270142,0.0438973105  
H,0,4.643117543,2.7790329069,-0.0111060707  
Br,0,-4.3496844379,0.9524359859,0.0755939394  
H,0,-3.8703708208,-1.9666336428,0.0156233256  
H,0,-1.5010513202,1.5378392307,0.048317033  
H,0,-0.3010119904,2.9987004734,0.0572351096  
C,0,1.521457836,4.0863896407,0.0531167229  
H,0,1.009666612,5.0320127587,0.0767069919  
C,0,0.6845762786,-3.9245280184,-0.0805857768  
C,0,2.2162805601,-4.1602803127,-0.1051909971  
H,0,0.1854659869,-4.3140016824,-0.9614838859  
H,0,0.2088159295,-4.346025189,0.7984929187  
H,0,2.5214475723,-4.7041818664,-0.9924607196  
H,0,2.5445806836,-4.7362260182,0.7531247034

HF=-3441.7125376  
RMSD=8.244e-009  
Dipole=-1.5758249,0.1144842,0.022368  
PG=C01 [X(C18H11Br1N2O1)]

### **Compound 25 H+**

Charge = 1 Multiplicity = 1  
C,0,-2.8183252567,-0.1203978507,0.0463851809  
C,0,-2.8972196284,-1.5149008551,0.0188301416  
C,0,-1.7560958941,-2.2744731801,-0.0167501332  
C,0,-0.5058364283,-1.6532151424,-0.0255827934  
C,0,-0.4111806399,-0.2455073856,0.0019572544  
C,0,-1.6022503506,0.5008916332,0.0381409622  
C,0,0.9079183735,0.333872481,-0.0089323748  
C,0,2.0026898669,-0.4836637506,-0.0449769913  
C,0,1.866752335,-1.8767031746,-0.0714596717  
N,0,0.6486879225,-2.4159462817,-0.0614805571  
C,0,1.4006171082,1.7457236793,0.0119313842  
C,0,2.8038429167,1.7131898988,-0.0130209284  
C,0,3.2602978649,0.2969193756,-0.0504725633  
O,0,4.3635723021,-0.1497625178,-0.0789162164  
N,0,2.807890574,-2.792942141,-0.1066728454  
C,0,0.7527094333,2.9618609498,0.0484523669  
C,0,2.9025191713,4.0795481565,0.0345096746  
C,0,3.5652975319,2.8517286745,-0.0024956646  
H,0,-1.8366368104,-3.3436367773,-0.0375415184  
H,0,3.4676900672,4.9931884233,0.0437297155  
H,0,4.6379050397,2.7934290671,-0.022252135  
Br,0,-4.4002508009,0.9010631384,0.0950574589  
H,0,-3.8577765038,-1.9938083088,0.0255950462  
H,0,-1.5686390446,1.5674625024,0.0596671364  
H,0,-0.3132298853,3.0569211914,0.0689220247  
C,0,1.5229232547,4.1268539271,0.0593622924  
H,0,1.0253617423,5.0787882745,0.0877813883  
C,0,0.733191258,-3.8871559747,-0.0932860602  
C,0,2.2587222599,-4.1441054746,-0.1252032755  
H,0,0.2351979283,-4.2658617223,-0.9747693378  
H,0,0.2659584901,-4.3021935017,0.7886798815  
H,0,2.5613404764,-4.6672729405,-1.0216490625  
H,0,2.5919954175,-4.703841518,0.7376483895  
H,0,3.7755441638,-2.5528613585,-0.1187518449

HF=-3442.1415096  
RMSD=5.212e-009  
Dipole=1.2767589,-2.3448734,-0.0708537  
PG=C01 [X(C18H12Br1N2O1)]

### **Compound 2g**

Charge = 0 Multiplicity = 1  
C,0,-3.4139534617,-0.1682739282,0.1962565909  
C,0,-3.4076773197,-1.5769454835,0.093721865  
C,0,-2.2226732944,-2.2276820993,-0.0041958103

C,0,-0.9978051412,-1.5121942737,-0.003479443  
C,0,-1.0123720643,-0.1086648362,0.1041709047  
C,0,-2.2661163367,0.5509856167,0.2021541839  
C,0,0.2598134006,0.5282224676,0.0649242291  
C,0,1.3967374889,-0.2307450909,-0.0776823573  
C,0,1.2841175081,-1.647276529,-0.1060614277  
N,0,0.137771135,-2.2382552418,-0.08169261  
C,0,0.6463186909,1.9653423689,0.0921820576  
C,0,2.0289757338,2.0518824829,-0.1160867083  
C,0,2.5584498846,0.6760092226,-0.2696548261  
N,0,3.7020900537,0.2555265201,-0.5758433833  
N,0,2.3998047495,-2.4980650867,-0.1645230734  
C,0,-0.089791382,3.1190176612,0.2938933877  
C,0,1.9243627098,4.4247110763,0.056938378  
C,0,2.6752630868,3.2728141238,-0.1397643288  
H,0,-2.1759348793,-3.2974320489,-0.0816350444  
H,0,2.4099195381,5.3839090642,0.0448602265  
H,0,3.7311074031,3.3308968433,-0.3020937989  
Br,0,-5.0818904404,0.724869216,0.3243060096  
H,0,-4.3366002594,-2.1142598919,0.0940474438  
H,0,-2.3235303944,1.6140499647,0.2712593183  
H,0,-1.1436551955,3.1027182984,0.4777042307  
C,0,0.5609784831,4.3461671986,0.2736611739  
H,0,-0.007822705,5.2449276276,0.4318905455  
C,0,3.5456041482,-2.4782698085,0.6101910102  
C,0,4.1973947891,-3.6170820849,0.3230149373  
N,0,3.4972259175,-4.3555348646,-0.6060632725  
C,0,2.4383939655,-3.6768344034,-0.8515457529  
H,0,3.7728129615,-1.6747029485,1.2723385745  
H,0,5.1286812236,-3.9602183825,0.7228913382  
H,0,1.6496479745,-3.9548105802,-1.5177203359  
O,0,4.6201794065,1.2360255208,-0.7755384664  
H,0,5.4057361659,0.7734939546,-1.0189171132

HF=-3588.4210539

RMSE=5.458e-009

Dipole=-0.0307091,2.0660834,0.2518793

PG=C01 [X(C19H11Br1N4O1)]

### **Compound 2gH+**

Charge = 1 Multiplicity = 1

C,0,-3.4376962199,-0.1497917312,0.2215476191  
C,0,-3.4262739095,-1.5633608778,0.1514472138  
C,0,-2.2437622364,-2.2172233756,0.0570631911  
C,0,-1.0235153438,-1.4969764658,0.0283884306  
C,0,-1.035059497,-0.0867281774,0.1016214177  
C,0,-2.2906681102,0.5709611974,0.1984969604  
C,0,0.2285153099,0.5610589164,0.0473244863  
C,0,1.3763648906,-0.1982371532,-0.0681112148  
C,0,1.2422408882,-1.5933047552,-0.0898951863  
N,0,0.1191275824,-2.2147336443,-0.0539710093  
C,0,0.6190182374,1.9953847048,0.0471673967  
C,0,2.009632429,2.0756247581,-0.1229361792  
C,0,2.54637382,0.7006760171,-0.224977449  
N,0,3.7021964942,0.2556885064,-0.4430796763

N,0,2.3786007931,-2.4774135735,-0.1662189845  
C,0,-0.1228882854,3.1537327826,0.1862165576  
C,0,1.9009152284,4.4506854019,-0.0272563105  
C,0,2.6586916043,3.2938841373,-0.1640602281  
H,0,-2.2006911002,-3.2886038476,0.0065530938  
H,0,2.3864511825,5.408942943,-0.05485244  
H,0,3.7188809168,3.3496499133,-0.295800835  
Br,0,-5.0993559847,0.7346359832,0.3486134183  
H,0,-4.3544038938,-2.1012450162,0.1749163221  
H,0,-2.3488694709,1.6345959059,0.2495772095  
H,0,-1.1826406196,3.1461829219,0.3304367616  
C,0,0.5311112632,4.3792804065,0.1472235969  
H,0,-0.0407848705,5.2826600413,0.256109085  
C,0,3.5063983112,-2.4963582109,0.6381001427  
C,0,4.2049217091,-3.5883021062,0.3097547519  
N,0,3.4920980526,-4.2228834964,-0.6914275326  
C,0,2.4007049318,-3.5391217599,-0.9418859773  
H,0,3.6994160664,-1.7351018142,1.357603873  
H,0,5.1256578648,-3.9739194767,0.6874905986  
H,0,1.6407010742,-3.7962515465,-1.6472827123  
O,0,4.6407646903,1.221057091,-0.5998752087  
H,0,5.4407774069,0.7629960584,-0.8014758317  
H,0,3.7525368041,-5.0665290215,-1.154237995

HF=-3588.8237819

RMSD=7.051e-009

Dipole=4.6452388,-3.7795648,-0.7429579

PG=C01 [X(C19H12Br1N4O1)]

## Compound 2b

Charge = 0 Multiplicity = 1

C,0,-2.8124827911,-0.1866511805,0.0161225686  
C,0,-2.9427105787,-1.590696118,-0.0062719526  
C,0,-1.8285485564,-2.3660595086,-0.0267325077  
C,0,-0.5353160958,-1.7872486632,-0.0260048412  
C,0,-0.4169309658,-0.3813957138,-0.0035996538  
C,0,-1.5943473383,0.4074937688,0.0176020201  
C,0,0.9147172172,0.1278587127,-0.0042988851  
C,0,1.9627070945,-0.7484178755,-0.0256429537  
C,0,1.715396296,-2.1477646535,-0.0469942074  
N,0,0.5221217648,-2.6352767044,-0.0470768178  
C,0,1.4562981634,1.526740354,0.0148813913  
C,0,2.8487684062,1.4373636163,0.0042961888  
C,0,3.2552827809,-0.0028658035,-0.0219361761  
O,0,4.366634294,-0.422207996,-0.0360637395  
O,0,2.7674846295,-2.9400459377,-0.0670192208  
C,0,0.8603077987,2.7705613615,0.038819851  
C,0,3.054437474,3.7987459091,0.0412073219  
C,0,3.6590108413,2.5440089644,0.016924591  
H,0,-1.8961433332,-3.4373282034,-0.0439800151  
H,0,3.6580409128,4.6883199735,0.0516846776  
H,0,4.7279751271,2.4329713216,0.0080977367  
Br,0,-4.3828836516,0.8775481101,0.0446889196  
H,0,-3.9207818485,-2.032976778,-0.0069067499  
H,0,-1.5361552974,1.4736926564,0.035037803  
H,0,-0.2018983162,2.9053994176,0.0477695096

C,0,1.6766957843,3.9021747016,0.0518229715  
H,0,1.2179013639,4.8746812189,0.0705246233  
C,0,2.5652189718,-4.338475788,-0.088535223  
H,0,2.0138109029,-4.6334107016,-0.9710008164  
H,0,2.0253322384,-4.6621976468,0.7909570016  
H,0,3.5540153033,-4.7705992159,-0.1020575716

HF=-3423.6905686

RMSD=8.253e-009

Dipole=-0.5022873,0.5041672,0.0112763

PG=C01 [X(C17H10Br1N1O2)]

### ***Compound 2d***

Charge = 0 Multiplicity = 1

C,0,-3.2110980415,-0.0992350338,0.146798779  
C,0,-3.2071045236,-1.5104976955,0.0409476045  
C,0,-2.027791918,-2.1696402235,-0.0510121668  
C,0,-0.7959395847,-1.4617029565,-0.0413784487  
C,0,-0.809280255,-0.0561496061,0.0657868946  
C,0,-2.0608832031,0.612227532,0.159002544  
C,0,0.4613642142,0.5706470758,0.0416207933  
C,0,1.6028930089,-0.1948290096,-0.0681189417  
C,0,1.4884549646,-1.6102222089,-0.124183448  
N,0,0.3319126437,-2.1921306836,-0.1181736537  
C,0,0.8398228204,2.0207236096,0.062036742  
C,0,2.2198047187,2.0946757971,-0.1036001202  
C,0,2.7833691121,0.7193815246,-0.21009517  
O,0,3.9286633709,0.452506228,-0.3881607863  
N,0,2.5858517723,-2.4712322032,-0.2054636149  
C,0,0.1169558944,3.1879836543,0.2077197252  
C,0,2.1701719344,4.4603074142,0.0003971296  
C,0,2.9021560872,3.2851321167,-0.1407183057  
H,0,-1.9884349942,-3.2393967611,-0.1298676601  
H,0,2.6679060502,5.4127279116,-0.0226652746  
H,0,3.9684307408,3.2956587229,-0.2737151244  
Br,0,-4.8762642375,0.7969624787,0.2712586152  
H,0,-4.1388695214,-2.0430988599,0.0349919291  
H,0,-2.1097433451,1.6754112913,0.2355615904  
H,0,-0.9433040089,3.2032759368,0.351834791  
C,0,0.799819019,4.40347594,0.1747010099  
H,0,0.2420803824,5.3158029861,0.2884322435  
C,0,3.8463271721,-2.3712370664,0.3672304181  
C,0,4.4480487085,-3.5451616798,0.1237984074  
N,0,3.6130662289,-4.3856791159,-0.5828393802  
C,0,2.5263018916,-3.7314433904,-0.7437039519  
H,0,4.1838738051,-1.4929958453,0.8628982102  
H,0,5.4346584742,-3.8463639267,0.4070483007  
H,0,1.6471771256,-4.0780787771,-1.2413246728

HF=-3533.4539629

RMSD=8.752e-009

Dipole=-1.2295682,2.3341505,0.4290611

PG=C01 [X(C19H10Br1N3O1)]

## Compound 2e

Charge = 0 Multiplicity = 1

C,0,-3.0626403782,-1.008425992,0.0162591648  
C,0,-2.6581183911,-2.364521498,-0.0229229471  
C,0,-1.338247833,-2.6658074769,-0.0349451329  
C,0,-0.3561846687,-1.6386002319,-0.0077573588  
C,0,-0.7696714208,-0.2901447316,0.0309963593  
C,0,-2.1620031837,0.0000096718,0.0412511084  
C,0,0.2724980737,0.668841613,0.0376667909  
C,0,1.5835278925,0.247226833,0.0207601557  
C,0,1.8700296332,-1.1425337172,0.0069073981  
N,0,0.9320711151,-2.027910085,-0.0057523078  
C,0,0.2377090453,2.1671259637,0.0067659515  
C,0,1.5539088751,2.6151910161,-0.0763764893  
C,0,2.478403718,1.445750103,-0.0759987629  
O,0,3.6654818851,1.4958202753,-0.1399205755  
N,0,3.1863810649,-1.6300331477,0.0004978947  
C,0,-0.7859757041,3.0922079439,0.042965499  
C,0,0.8489031335,4.8768421572,-0.0991356006  
C,0,1.8836719779,3.9463582773,-0.1310405467  
H,0,-0.9928347871,-3.6815504709,-0.0657792787  
H,0,1.0667450725,5.9286228365,-0.1409217071  
H,0,2.9130063322,4.24816225,-0.196360594  
Br,0,-4.9172849564,-0.6157521928,0.0319012477  
H,0,-3.4019011779,-3.137937248,-0.0435850683  
H,0,-2.5113629308,1.008186656,0.0675956743  
H,0,-1.817585057,2.8162913085,0.1148993267  
C,0,-0.4622376555,4.4479502287,-0.0110787565  
H,0,-1.255938307,5.1730253342,0.0168562899  
C,0,4.2420519505,-1.2238180504,0.750874362  
C,0,5.2526269077,-2.0940155128,0.522658188  
C,0,4.7058304396,-3.0204314185,-0.4029256968  
N,0,3.4766240385,-2.7454881575,-0.6945955309  
H,0,4.1904279162,-0.358918317,1.3720309577  
H,0,6.2354922438,-2.0769476655,0.9431220396  
H,0,5.1850410888,-3.865381478,-0.8556292142

HF= -3533.42936975

HF=-3533.4293698|

RMSE=9.021e-009

Dipole=-0.7143412,1.496856,0.5894937

PG=C01 [X(C19H10Br1N3O1 )]

## Compound 2c

Charge = 0 Multiplicity = 1

C,0,-3.1179834437,-0.052030197,0.156271184  
C,0,-3.2001301068,-1.4608139089,0.0726723508  
C,0,-2.0605306189,-2.1872171477,-0.0308506319  
C,0,-0.7937955639,-1.5501153482,-0.0559622021  
C,0,-0.7205361237,-0.1440473354,0.0279458896  
C,0,-1.9285414275,0.5951564492,0.1358116751  
C,0,0.5847685707,0.4151464226,-0.0039467081  
C,0,1.6651266084,-0.4239048413,-0.1113810184  
C,0,1.4654168576,-1.8204715787,-0.1881939148  
N,0,0.2923567785,-2.3495280456,-0.1612262493

C,0,1.0704333622,1.8315412402,0.0593929446  
C,0,2.4628644538,1.8026830022,-0.0135204385  
C,0,2.9268852078,0.3891845985,-0.1253093003  
O,0,4.0493113267,0.0127340352,-0.2062620659  
C,0,2.6348890655,-2.7842433534,-0.3083611831  
C,0,0.4268405743,3.0475169479,0.167821937  
C,0,2.5771555874,4.1655399309,0.1276685183  
C,0,3.2294750686,2.9406307775,0.018160917  
H,0,-2.0813410153,-3.2584391739,-0.0965366868  
H,0,3.1441325395,5.0783109745,0.1555528732  
H,0,4.3005009311,2.8746613295,-0.0406044923  
Br,0,-4.724286195,0.9415003414,0.3003536396  
H,0,-4.1610847731,-1.93793373,0.0920850982  
H,0,-1.9141000652,1.660467776,0.201509466  
H,0,-0.6381982369,3.1383568663,0.2277203808  
C,0,1.1974783892,4.2096143802,0.2007717082  
H,0,0.7015574003,5.1600632723,0.2851580716  
F,0,3.4410909959,-2.6709655379,0.7300543931  
F,0,3.3316587642,-2.5379421891,-1.401512494  
F,0,2.2315461527,-4.0320028793,-0.3654899199

HF=-3645.4038559

RMSD=5.418e-009

Dipole=-1.3094064,1.853069,0.1824836

PG=C01 [X(C17H7Br1F3N1O1)]



## References:

- 1 C. C. J. Roothan, *Rev. Mod. Phys.* 1951, **23**, 69-89.
- 2 R. Ditchfield, W. J. Hehre, J. A. Pople, *J. Chem. Phys.* 1971, **54**, 724-728.
- 3 Gaussian 03, Revision B.02, J. A. Pople *et. al.*, Gaussian, Inc., Pittsburgh PA, **2003**.
- 4 K. Ruud, T. Helgaker, K. L. Bak, P. Jørgensen, H. J. A. Jensen, *J. Chem. Phys.* 1993, **99**, 3847-3859.
